# Supplementary material for: Multi-omics Insights into the Effects of Region and Growth Period on the Bioactive Compounds of Angelica sinensis (Oliv.) Diels
Source: Research Square preprint supplement (doi:10.21203/rs.3.rs-7812601/v1), 2025-11-24
Supplement: Supplementary file 1 [file 4e7cf81b7605c5f70947b276.xlsx]

## Sheet: DEGs-A7vsA5 （GO）
No.	Category	ID	term	Genes	adj_pvalue
1	BP	GO:0010200	response to chitin	AS10G02379-RA,AS01G03495-RA,AS11G01447-RA,AS05G00752-RA,AS08G01485-RA,AS07G00478-RA,AS11G01952-RA,AS08G03536-RA,AS11G00942-RA,AS08G00023-RA,AS06G03735-RA,AS02G00111-RA,AS08G01197-RA,AS11G02326-RA,AS03G02652-RA,AS01G01188-RA,AS02G00605-RA,AS01G03176-RA,AS10G00370-RA,AS07G03050-RA,AS06G03178-RA,AS01G03267-RA,AS08G00193-RA,AS01G00060-RA,AS05G02415-RA,AS11G02192-RA,AS11G00148-RA,AS05G00901-RA,AS02G00…	9.068998334808e-18
2	BP	GO:0019748	secondary metabolic process	AS06G02568-RA,AS06G03499-RA,AS01G03183-RA,AS05G02486-RA,AS02G02948-RA,AS04G03593-RA,AS01G03363-RA,AS01G01384-RA,AS09G00193-RA,AS03G00113-RA,AS11G01385-RA,AS03G02023-RA,AS06G03538-RA,AS04G02686-RA,AS04G00781-RA,AS06G00582-RA,AS05G01898-RA,AS06G03556-RA,AS02G01011-RA,AS10G00416-RA,AS11G00901-RA,AS01G01069-RA,AS03G02658-RA,AS02G00410-RA,AS04G00249-RA,AS09G00047-RA,AS07G02082-RA,AS07G02833-RA,AS02G02…	7.23687956066094e-14
3	BP	GO:0010243	response to organonitrogen compound	AS10G02379-RA,AS01G03495-RA,AS11G01447-RA,AS05G00752-RA,AS08G01485-RA,AS07G00478-RA,AS11G01952-RA,AS08G03536-RA,AS11G00942-RA,AS01G03349-RA,AS08G00023-RA,AS06G03735-RA,AS02G00111-RA,AS08G01197-RA,AS11G02326-RA,AS03G02652-RA,AS01G01188-RA,AS02G00605-RA,AS01G03176-RA,AS10G00370-RA,AS07G03050-RA,AS06G03178-RA,AS03G02551-RA,AS08G03891-RA,AS02G03612-RA,AS01G03267-RA,AS08G00193-RA,AS01G00060-RA,AS08G01…	1.93970097691663e-11
4	CC	GO:0031226	intrinsic component of plasma membrane	AS10G00067-RA,AS08G02807-RA,AS09G00741-RA,AS01G03108-RA,AS05G00389-RA,AS10G00384-RA,AS06G00548-RA,AS03G00739-RA,AS07G01392-RA,AS05G00235-RA,AS06G03011-RA,AS01G02077-RA,AS10G00182-RA,AS02G02508-RA,AS05G01265-RA,AS04G02739-RA,AS11G00716-RA,AS07G03048-RA,AS06G03056-RA,AS08G01281-RA,AS01G02890-RA,AS06G02367-RA,AS02G01865-RA,AS07G02278-RA,AS04G00236-RA,AS02G02346-RA,AS01G00938-RA,AS07G01467-RA,AS07G00…	2.13510808320782e-10
5	BP	GO:0044550	secondary metabolite biosynthetic process	AS06G02568-RA,AS06G03499-RA,AS01G03183-RA,AS02G02948-RA,AS04G03593-RA,AS01G01384-RA,AS09G00193-RA,AS03G00113-RA,AS11G01385-RA,AS03G02023-RA,AS06G03538-RA,AS04G02686-RA,AS05G01898-RA,AS02G01011-RA,AS11G00901-RA,AS01G01069-RA,AS03G02658-RA,AS02G00410-RA,AS04G00249-RA,AS09G00047-RA,AS07G02082-RA,AS07G02833-RA,AS02G02804-RA,AS04G03120-RA,AS08G03457-RA,AS07G00843-RA,AS01G01864-RA,AS08G00542-RA,AS06G00…	2.13510808320782e-10
6	BP	GO:0009611	response to wounding	AS09G01753-RA,AS08G02659-RA,AS04G00772-RA,AS05G00750-RA,AS02G01923-RA,AS08G03536-RA,AS03G02023-RA,AS09G00627-RA,AS04G02400-RA,AS10G00870-RA,AS01G01188-RA,AS07G03050-RA,AS08G01809-RA,AS03G02018-RA,AS08G01893-RA,AS03G00911-RA,AS09G00302-RA,AS07G02493-RA,AS02G00130-RA,AS04G02942-RA,AS09G00630-RA,AS06G02679-RA,AS05G00251-RA,AS04G03343-RA,AS08G01240-RA,AS11G01104-RA,AS04G01097-RA,AS03G01225-RA,AS04G02…	5.99523864389459e-09
7	CC	GO:0031225	anchored component of membrane	AS07G02689-RA,AS08G02807-RA,AS09G00741-RA,AS05G00389-RA,AS10G00384-RA,AS06G00548-RA,AS05G00235-RA,AS10G00182-RA,AS02G02508-RA,AS01G01251-RA,AS05G01265-RA,AS04G02739-RA,AS11G00716-RA,AS07G03048-RA,AS01G02890-RA,AS05G02144-RA,AS02G01865-RA,AS07G02278-RA,AS02G02346-RA,AS06G03472-RA,AS01G00938-RA,AS03G00319-RA,AS08G00706-RA,AS08G02511-RA,AS02G00135-RA,AS01G01557-RA,AS10G01587-RA,AS05G00589-RA,AS05G00…	4.68455664420858e-07
8	BP	GO:0071554	cell wall organization or biogenesis	AS06G02856-RA,AS07G02689-RA,AS11G01454-RA,AS05G01492-RA,AS11G01636-RA,AS08G03558-RA,AS04G02428-RA,AS01G01384-RA,AS01G03108-RA,AS06G02320-RA,AS04G00580-RA,AS01G02601-RA,AS04G02686-RA,AS08G00521-RA,AS07G00877-RA,AS04G02400-RA,AS10G01519-RA,AS01G01251-RA,AS01G01034-RA,AS04G02739-RA,AS06G03252-RA,AS02G01011-RA,AS05G00042-RA,AS08G03009-RA,AS03G00064-RA,AS05G02139-RA,AS04G02137-RA,AS01G00938-RA,AS11G00…	1.03731897455964e-06
9	BP	GO:0071669	plant-type cell wall organization or biogenesis	AS07G02689-RA,AS11G01454-RA,AS05G01492-RA,AS04G02428-RA,AS01G01384-RA,AS01G03108-RA,AS04G00580-RA,AS04G02686-RA,AS07G00877-RA,AS10G01519-RA,AS01G01251-RA,AS01G01034-RA,AS04G02739-RA,AS02G01011-RA,AS05G00042-RA,AS08G03009-RA,AS05G02139-RA,AS04G02137-RA,AS11G00901-RA,AS09G01066-RA,AS05G03241-RA,AS02G03287-RA,AS01G03423-RA,AS04G00249-RA,AS03G00690-RA,AS04G02432-RA,AS05G00697-RA,AS04G02173-RA,AS08G01…	1.03731897455964e-06
10	BP	GO:1901698	response to nitrogen compound	AS10G02379-RA,AS01G03495-RA,AS11G01447-RA,AS05G00752-RA,AS08G01485-RA,AS07G00478-RA,AS11G01952-RA,AS08G03536-RA,AS01G01324-RA,AS11G00942-RA,AS01G03349-RA,AS08G00023-RA,AS06G03735-RA,AS02G00111-RA,AS08G01197-RA,AS11G02326-RA,AS03G02652-RA,AS01G01188-RA,AS02G00605-RA,AS01G03176-RA,AS10G00370-RA,AS07G03050-RA,AS06G03178-RA,AS01G00075-RA,AS03G02551-RA,AS03G02124-RA,AS08G03891-RA,AS02G01503-RA,AS02G03…	1.03731897455964e-06
11	CC	GO:0009505	plant-type cell wall	AS04G00569-RA,AS08G01962-RA,AS03G02592-RA,AS05G00389-RA,AS05G00235-RA,AS06G00838-RA,AS08G00521-RA,AS03G00007-RA,AS11G02587-RA,AS10G01519-RA,AS05G01265-RA,AS05G02230-RA,AS08G03009-RA,AS02G02346-RA,AS05G02139-RA,AS06G03472-RA,AS11G02006-RA,AS04G02137-RA,AS03G00319-RA,AS08G00706-RA,AS03G00289-RA,AS02G01428-RA,AS01G02521-RA,AS04G02173-RA,AS07G00514-RA,AS07G02417-RA,AS01G01557-RA,AS04G03076-RA,AS10G01…	2.52448160181985e-06
12	BP	GO:0009834	plant-type secondary cell wall biogenesis	AS07G02689-RA,AS11G01454-RA,AS05G01492-RA,AS04G02428-RA,AS01G01384-RA,AS01G03108-RA,AS04G02686-RA,AS01G01251-RA,AS02G01011-RA,AS05G00042-RA,AS11G00901-RA,AS09G01066-RA,AS05G03241-RA,AS02G03287-RA,AS01G03423-RA,AS03G00690-RA,AS01G03747-RA,AS06G02964-RA,AS07G00843-RA,AS01G01864-RA,AS11G00148-RA,AS05G01264-RA,AS01G01249-RA,AS02G01081-RA,AS08G02903-RA,AS03G02428-RA,AS05G02391-RA,AS08G00495-RA,AS07G00…	2.52448160181985e-06
13	BP	GO:0009414	response to water deprivation	AS07G01198-RA,AS03G00743-RA,AS01G03363-RA,AS08G03536-RA,AS06G03903-RA,AS01G02601-RA,AS06G03011-RA,AS03G01775-RA,AS03G00402-RA,AS06G00582-RA,AS07G03345-RA,AS06G03735-RA,AS06G01938-RA,AS11G02326-RA,AS08G02559-RA,AS07G02823-RA,AS01G02682-RA,AS06G03774-RA,AS06G01070-RA,AS03G02650-RA,AS03G02018-RA,AS08G01893-RA,AS10G00030-RA,AS04G01364-RA,AS08G00202-RA,AS09G03090-RA,AS05G03112-RA,AS11G01257-RA,AS07G01…	6.64161626707639e-06
14	BP	GO:0009415	response to water	AS07G01198-RA,AS03G00743-RA,AS01G03363-RA,AS08G03536-RA,AS06G03903-RA,AS01G02601-RA,AS06G03011-RA,AS03G01775-RA,AS03G00402-RA,AS06G00582-RA,AS07G03345-RA,AS06G03735-RA,AS06G01938-RA,AS11G02326-RA,AS08G02559-RA,AS07G02823-RA,AS01G02682-RA,AS06G03774-RA,AS06G01070-RA,AS03G02650-RA,AS03G02018-RA,AS08G01893-RA,AS10G00030-RA,AS04G01364-RA,AS08G00202-RA,AS09G03090-RA,AS05G03112-RA,AS11G01257-RA,AS07G01…	9.4973267772058e-06
15	MF	GO:0016722	oxidoreductase activity, acting on metal ions	AS07G02486-RA,AS07G00502-RA,AS01G01384-RA,AS03G00113-RA,AS08G00008-RA,AS06G00548-RA,AS07G03431-RA,AS01G00523-RA,AS02G01011-RA,AS11G00901-RA,AS06G03130-RA,AS03G00337-RA,AS11G02004-RA,AS08G00706-RA,AS01G01557-RA,AS07G00843-RA,AS08G00226-RA,AS06G01760-RA,AS11G02480-RA,AS11G02368-RA,AS11G00920-RA,AS01G00928-RA,AS07G02428-RA	1.27105710504299e-05
16	CC	GO:0046658	anchored component of plasma membrane	AS08G02807-RA,AS09G00741-RA,AS05G00389-RA,AS10G00384-RA,AS06G00548-RA,AS05G00235-RA,AS10G00182-RA,AS02G02508-RA,AS05G01265-RA,AS04G02739-RA,AS11G00716-RA,AS07G03048-RA,AS01G02890-RA,AS02G01865-RA,AS07G02278-RA,AS02G02346-RA,AS01G00938-RA,AS03G00319-RA,AS08G00706-RA,AS08G02511-RA,AS01G01557-RA,AS10G01587-RA,AS05G00589-RA,AS05G00991-RA,AS05G01780-RA,AS01G00633-RA,AS01G00091-RA,AS04G00884-RA,AS06G02…	3.18027851437038e-05
17	MF	GO:0046873	metal ion transmembrane transporter activity	AS06G00379-RA,AS07G01198-RA,AS01G01211-RA,AS06G03011-RA,AS02G01376-RA,AS08G03846-RA,AS06G03056-RA,AS08G01281-RA,AS06G00240-RA,AS08G03804-RA,AS06G01070-RA,AS10G00030-RA,AS08G00562-RA,AS02G01503-RA,AS05G03067-RA,AS11G01032-RA,AS06G01506-RA,AS04G02230-RA,AS10G01021-RA,AS01G01339-RA,AS04G02962-RA,AS02G01181-RA,AS03G00591-RA,AS04G03645-RA,AS04G00078-RA,AS06G00878-RA,AS01G00687-RA,AS02G01126-RA,AS05G02…	3.18027851437038e-05
18	MF	GO:0004497	monooxygenase activity	AS04G02302-RA,AS02G02948-RA,AS04G02523-RA,AS04G00608-RA,AS05G01898-RA,AS11G00187-RA,AS01G01069-RA,AS03G02658-RA,AS02G00410-RA,AS06G02080-RA,AS09G00047-RA,AS08G00075-RA,AS09G03090-RA,AS04G03360-RA,AS08G00542-RA,AS05G00251-RA,AS02G03828-RA,AS08G00250-RA,AS11G00024-RA,AS02G01008-RA,AS07G02325-RA,AS07G01482-RA,AS08G03466-RA,AS04G00953-RA,AS02G00871-RA,AS03G00837-RA,AS09G00870-RA,AS03G02657-RA,AS01G02…	3.29122026431994e-05
19	CC	GO:0005887	integral component of plasma membrane	AS10G00067-RA,AS01G03108-RA,AS03G00739-RA,AS07G01392-RA,AS06G03011-RA,AS01G02077-RA,AS06G03056-RA,AS08G01281-RA,AS06G02367-RA,AS04G00236-RA,AS07G01467-RA,AS07G00461-RA,AS06G02964-RA,AS08G00556-RA,AS02G00475-RA,AS11G01032-RA,AS05G03476-RA,AS08G01021-RA,AS06G01044-RA,AS03G02859-RA,AS07G01972-RA,AS03G02542-RA,AS03G02925-RA,AS08G01316-RA,AS01G01339-RA,AS08G00555-RA,AS02G01181-RA,AS07G01416-RA,AS03G00…	3.55496787258455e-05
20	MF	GO:0004888	transmembrane signaling receptor activity	AS05G00752-RA,AS07G00405-RA,AS11G02359-RA,AS03G02955-RA,AS04G03186-RA,AS02G03737-RA,AS05G01315-RA,AS06G03056-RA,AS08G02876-RA,AS02G02484-RA,AS04G00172-RA,AS08G01746-RA,AS03G02650-RA,AS04G02901-RA,AS09G02189-RA,AS10G01508-RA,AS10G01518-RA,AS02G03055-RA,AS07G01556-RA,AS02G02929-RA,AS04G01628-RA,AS05G00033-RA,AS06G01506-RA,AS01G02459-RA,AS01G03340-RA,AS09G02928-RA,AS04G02962-RA,AS02G00581-RA,AS03G02…	5.29472960450348e-05
21	BP	GO:0009636	response to toxic substance	AS03G00743-RA,AS04G00580-RA,AS11G00990-RA,AS06G00066-RA,AS10G01519-RA,AS01G03349-RA,AS06G03056-RA,AS11G00382-RA,AS08G03009-RA,AS05G02139-RA,AS03G00476-RA,AS04G02137-RA,AS07G03050-RA,AS10G00416-RA,AS06G03712-RA,AS01G02682-RA,AS03G02551-RA,AS08G01893-RA,AS04G00673-RA,AS08G00202-RA,AS02G00053-RA,AS05G03275-RA,AS01G00899-RA,AS07G02640-RA,AS02G00147-RA,AS05G00459-RA,AS04G03104-RA,AS10G02600-RA,AS11G02…	0.000123039870779691
22	BP	GO:0042546	cell wall biogenesis	AS06G02856-RA,AS07G02689-RA,AS11G01454-RA,AS05G01492-RA,AS04G02428-RA,AS01G01384-RA,AS01G03108-RA,AS04G02686-RA,AS07G00877-RA,AS01G01251-RA,AS01G01034-RA,AS06G03252-RA,AS02G01011-RA,AS05G00042-RA,AS11G00901-RA,AS09G01066-RA,AS05G03241-RA,AS02G03287-RA,AS01G03423-RA,AS04G00249-RA,AS03G00690-RA,AS04G00673-RA,AS09G01881-RA,AS04G02173-RA,AS08G01558-RA,AS11G01586-RA,AS01G03747-RA,AS06G02964-RA,AS07G00…	0.000138450980143434
23	BP	GO:0009699	phenylpropanoid biosynthetic process	AS06G03499-RA,AS01G03183-RA,AS01G01384-RA,AS09G00193-RA,AS03G00113-RA,AS03G02023-RA,AS06G03538-RA,AS04G02686-RA,AS02G01011-RA,AS11G00901-RA,AS01G01069-RA,AS04G00249-RA,AS07G02833-RA,AS02G02804-RA,AS08G03457-RA,AS07G00843-RA,AS01G01864-RA,AS08G00542-RA,AS05G00657-RA,AS05G03210-RA,AS11G01724-RA,AS07G02808-RA,AS06G02176-RA,AS11G01840-RA,AS01G01031-RA,AS05G03296-RA,AS06G02531-RA,AS04G00078-RA,AS10G00…	0.000143858459117534
24	BP	GO:0046677	response to antibiotic	AS01G03495-RA,AS03G00743-RA,AS05G00750-RA,AS03G00035-RA,AS07G02060-RA,AS05G01829-RA,AS01G03349-RA,AS06G03056-RA,AS11G00382-RA,AS02G00605-RA,AS04G02699-RA,AS03G00476-RA,AS07G03050-RA,AS09G01066-RA,AS06G03712-RA,AS01G02682-RA,AS08G01735-RA,AS03G02551-RA,AS08G01893-RA,AS08G00202-RA,AS02G03612-RA,AS02G00053-RA,AS04G02942-RA,AS01G01864-RA,AS04G03104-RA,AS04G02487-RA,AS11G02173-RA,AS11G01104-RA,AS04G01…	0.000143858459117534
25	BP	GO:0009642	response to light intensity	AS08G03536-RA,AS06G01619-RA,AS01G01188-RA,AS01G03176-RA,AS03G00476-RA,AS06G03712-RA,AS06G01894-RA,AS06G02080-RA,AS08G01893-RA,AS04G00673-RA,AS03G01046-RA,AS03G00620-RA,AS05G00082-RA,AS04G02487-RA,AS11G01104-RA,AS11G02376-RA,AS01G03040-RA,AS02G00885-RA,AS03G00591-RA,AS02G02681-RA,AS10G02144-RA,AS08G02714-RA,AS11G01476-RA,AS07G03192-RA,AS06G00370-RA,AS07G00134-RA,AS04G00012-RA,AS11G02119-RA,AS07G03…	0.000291046539551358
26	BP	GO:0009698	phenylpropanoid metabolic process	AS06G03499-RA,AS01G03183-RA,AS05G02486-RA,AS01G01384-RA,AS09G00193-RA,AS03G00113-RA,AS03G02023-RA,AS06G03538-RA,AS04G02686-RA,AS02G01011-RA,AS11G00901-RA,AS01G01069-RA,AS04G00249-RA,AS07G02833-RA,AS02G02804-RA,AS08G03457-RA,AS07G00843-RA,AS01G01864-RA,AS08G00542-RA,AS05G00657-RA,AS05G03210-RA,AS11G01724-RA,AS07G02808-RA,AS06G02176-RA,AS11G01840-RA,AS01G01031-RA,AS05G03296-RA,AS06G02531-RA,AS04G00…	0.000291046539551358
27	BP	GO:0009753	response to jasmonic acid	AS09G01753-RA,AS01G03495-RA,AS04G00608-RA,AS05G01829-RA,AS02G00605-RA,AS07G03050-RA,AS03G02018-RA,AS08G01735-RA,AS03G00911-RA,AS03G02124-RA,AS09G02370-RA,AS01G01864-RA,AS02G03383-RA,AS02G03804-RA,AS04G03343-RA,AS04G01928-RA,AS08G01240-RA,AS03G01225-RA,AS04G00469-RA,AS04G02962-RA,AS11G01504-RA,AS01G01433-RA,AS03G00354-RA,AS09G02126-RA,AS08G02488-RA,AS07G00717-RA,AS10G00442-RA,AS05G02015-RA,AS05G00…	0.000291046539551358
28	MF	GO:0038023	signaling receptor activity	AS05G00752-RA,AS07G00405-RA,AS11G02359-RA,AS03G02955-RA,AS04G03186-RA,AS02G03737-RA,AS04G02686-RA,AS05G01315-RA,AS06G03056-RA,AS08G02876-RA,AS02G02484-RA,AS04G00172-RA,AS08G01746-RA,AS03G02650-RA,AS04G02901-RA,AS09G02189-RA,AS10G01508-RA,AS10G01518-RA,AS02G03055-RA,AS07G01556-RA,AS02G02929-RA,AS04G01628-RA,AS05G00033-RA,AS06G01506-RA,AS01G02459-RA,AS05G00082-RA,AS01G03340-RA,AS09G02928-RA,AS04G02…	0.000291046539551358
29	MF	GO:0060089	molecular transducer activity	AS05G00752-RA,AS07G00405-RA,AS11G02359-RA,AS03G02955-RA,AS04G03186-RA,AS02G03737-RA,AS04G02686-RA,AS05G01315-RA,AS06G03056-RA,AS08G02876-RA,AS02G02484-RA,AS10G01128-RA,AS04G00172-RA,AS08G01746-RA,AS03G02650-RA,AS04G02901-RA,AS09G02189-RA,AS10G01508-RA,AS10G01518-RA,AS02G03055-RA,AS07G01556-RA,AS02G02929-RA,AS04G01628-RA,AS05G00033-RA,AS06G01506-RA,AS01G02459-RA,AS05G00082-RA,AS01G03340-RA,AS09G02…	0.000291046539551358
30	BP	GO:0070542	response to fatty acid	AS09G01753-RA,AS01G03495-RA,AS04G00608-RA,AS05G01829-RA,AS11G00382-RA,AS02G00605-RA,AS07G03050-RA,AS01G00075-RA,AS03G02018-RA,AS08G01735-RA,AS03G00911-RA,AS03G02124-RA,AS09G02370-RA,AS01G01864-RA,AS02G03383-RA,AS02G03804-RA,AS04G03343-RA,AS04G01928-RA,AS08G01240-RA,AS03G01225-RA,AS04G00469-RA,AS04G02962-RA,AS11G01504-RA,AS01G01433-RA,AS03G00354-RA,AS09G02126-RA,AS08G02488-RA,AS07G00717-RA,AS10G00…	0.000330613752662915
31	CC	GO:0005875	microtubule associated complex	AS07G01716-RA,AS08G04018-RA,AS03G00311-RA,AS03G01883-RA,AS05G00624-RA,AS04G01543-RA,AS03G00064-RA,AS09G00728-RA,AS01G00532-RA,AS01G00133-RA,AS04G02502-RA,AS04G02101-RA,AS06G00614-RA,AS02G02423-RA,AS01G00050-RA,AS05G00158-RA,AS08G02860-RA,AS07G00333-RA,AS09G00868-RA,AS08G03044-RA,AS05G00566-RA,AS04G00416-RA,AS02G03159-RA,AS01G03343-RA,AS05G03765-RA,AS07G02994-RA,AS04G00055-RA,AS09G01320-RA,AS05G00…	0.000337851413053843
32	BP	GO:0071395	cellular response to jasmonic acid stimulus	AS01G03495-RA,AS04G00608-RA,AS03G00911-RA,AS03G02124-RA,AS02G03383-RA,AS02G03804-RA,AS04G03343-RA,AS04G01928-RA,AS08G01240-RA,AS04G02962-RA,AS11G01504-RA,AS01G01433-RA,AS03G00354-RA,AS09G02126-RA,AS07G00717-RA,AS10G00442-RA,AS05G00901-RA,AS05G02093-RA,AS07G03192-RA,AS10G00617-RA,AS06G01118-RA,AS03G01743-RA,AS02G00852-RA,AS07G00547-RA,AS03G00294-RA,AS07G01388-RA,AS08G01873-RA,AS07G01374-RA,AS11G01…	0.000337851413053843
33	MF	GO:0001067	transcription regulatory region nucleic acid binding	AS09G00193-RA,AS05G01955-RA,AS03G01775-RA,AS05G01829-RA,AS04G01687-RA,AS08G00023-RA,AS06G03735-RA,AS10G00144-RA,AS04G00218-RA,AS10G00386-RA,AS08G01197-RA,AS02G00605-RA,AS01G03176-RA,AS01G03138-RA,AS04G02699-RA,AS09G01066-RA,AS11G02634-RA,AS03G00710-RA,AS07G02493-RA,AS02G03612-RA,AS09G01823-RA,AS02G00953-RA,AS08G00193-RA,AS01G00060-RA,AS01G01864-RA,AS10G00822-RA,AS08G00537-RA,AS07G02790-RA,AS06G00…	0.000355293366239377
34	MF	GO:0019199	transmembrane receptor protein kinase activity	AS05G00752-RA,AS11G02359-RA,AS03G02955-RA,AS04G03186-RA,AS02G03737-RA,AS05G01315-RA,AS08G02876-RA,AS02G02484-RA,AS04G00172-RA,AS08G01746-RA,AS03G02650-RA,AS04G02901-RA,AS09G02189-RA,AS10G01508-RA,AS10G01518-RA,AS02G03055-RA,AS07G01556-RA,AS02G02929-RA,AS04G01628-RA,AS05G00033-RA,AS01G02459-RA,AS01G03340-RA,AS09G02928-RA,AS02G00581-RA,AS03G02256-RA,AS07G00794-RA,AS06G00568-RA,AS06G00081-RA,AS03G00…	0.000355293366239377
35	MF	GO:0016705	oxidoreductase activity, acting on paired donors, with incorporation or reduction of molecular oxygen	AS02G02948-RA,AS05G01898-RA,AS01G01069-RA,AS03G02658-RA,AS06G02612-RA,AS02G00410-RA,AS09G00047-RA,AS08G00075-RA,AS05G03642-RA,AS09G03090-RA,AS04G03360-RA,AS08G00542-RA,AS10G00532-RA,AS08G01857-RA,AS02G03828-RA,AS08G00250-RA,AS02G01008-RA,AS07G01482-RA,AS03G00755-RA,AS08G03466-RA,AS06G01691-RA,AS04G00953-RA,AS02G00871-RA,AS03G00837-RA,AS09G00870-RA,AS03G02657-RA,AS07G01900-RA,AS01G02076-RA,AS02G03…	0.000357118804301583
36	MF	GO:0003777	microtubule motor activity	AS07G01716-RA,AS08G04018-RA,AS03G00311-RA,AS03G01883-RA,AS05G00624-RA,AS04G01543-RA,AS03G00064-RA,AS09G00728-RA,AS01G00532-RA,AS01G00133-RA,AS04G02502-RA,AS04G02101-RA,AS06G00614-RA,AS02G02423-RA,AS01G00050-RA,AS05G00158-RA,AS08G02860-RA,AS07G00333-RA,AS08G03044-RA,AS05G00566-RA,AS02G03159-RA,AS05G03765-RA,AS07G02994-RA,AS05G00801-RA,AS06G00349-RA,AS10G01716-RA,AS09G00894-RA,AS01G02008-RA	0.000357953281225144
37	CC	GO:0005871	kinesin complex	AS07G01716-RA,AS08G04018-RA,AS03G00311-RA,AS03G01883-RA,AS05G00624-RA,AS04G01543-RA,AS03G00064-RA,AS09G00728-RA,AS01G00532-RA,AS01G00133-RA,AS04G02502-RA,AS04G02101-RA,AS06G00614-RA,AS02G02423-RA,AS01G00050-RA,AS05G00158-RA,AS08G02860-RA,AS07G00333-RA,AS08G03044-RA,AS05G00566-RA,AS02G03159-RA,AS05G03765-RA,AS07G02994-RA,AS05G00801-RA,AS06G00349-RA,AS10G01716-RA,AS09G00894-RA,AS01G02008-RA	0.000357953281225144
38	BP	GO:0071398	cellular response to fatty acid	AS01G03495-RA,AS04G00608-RA,AS11G00382-RA,AS01G00075-RA,AS03G00911-RA,AS03G02124-RA,AS02G03383-RA,AS02G03804-RA,AS04G03343-RA,AS04G01928-RA,AS08G01240-RA,AS04G02962-RA,AS11G01504-RA,AS01G01433-RA,AS03G00354-RA,AS09G02126-RA,AS07G00717-RA,AS10G00442-RA,AS05G00901-RA,AS05G02093-RA,AS07G03192-RA,AS10G00617-RA,AS06G01118-RA,AS03G01743-RA,AS02G00852-RA,AS07G00547-RA,AS03G00294-RA,AS07G01388-RA,AS08G01…	0.000430746454781034
39	BP	GO:0009620	response to fungus	AS11G01454-RA,AS01G03495-RA,AS08G01485-RA,AS08G02659-RA,AS07G00478-RA,AS11G01952-RA,AS08G01624-RA,AS03G00035-RA,AS01G02601-RA,AS01G03086-RA,AS04G02400-RA,AS05G01265-RA,AS01G03349-RA,AS11G02594-RA,AS06G03472-RA,AS09G01066-RA,AS06G02396-RA,AS01G00075-RA,AS07G01236-RA,AS10G00308-RA,AS08G01893-RA,AS03G00911-RA,AS05G01050-RA,AS05G01701-RA,AS02G01428-RA,AS07G02417-RA,AS02G03055-RA,AS02G03612-RA,AS02G00…	0.000570757477938902
40	BP	GO:0009768	photosynthesis, light harvesting in photosystem I	AS09G02198-RA,AS11G02428-RA,AS05G03579-RA,AS10G01176-RA,AS01G03040-RA,AS10G01920-RA,AS07G03326-RA,AS06G01935-RA,AS04G03596-RA,AS09G00108-RA,AS11G00231-RA,AS08G01536-RA,AS11G00119-RA	0.000611837414077686
41	BP	GO:2000652	regulation of secondary cell wall biogenesis	AS04G02686-RA,AS09G01066-RA,AS02G03287-RA,AS01G03423-RA,AS03G00690-RA,AS01G01864-RA,AS11G00148-RA,AS05G01264-RA,AS02G01081-RA,AS05G02391-RA,AS08G00495-RA,AS07G00220-RA,AS04G00551-RA,AS05G01661-RA	0.000684703292138311
42	MF	GO:0016709	oxidoreductase activity, acting on paired donors, with incorporation or reduction of molecular oxygen, NAD(P)H as one donor, and incorporation of one atom of oxygen	AS02G02948-RA,AS05G01898-RA,AS03G02658-RA,AS02G00410-RA,AS09G00047-RA,AS09G03090-RA,AS04G03360-RA,AS08G00542-RA,AS02G03828-RA,AS08G00250-RA,AS02G01008-RA,AS07G01482-RA,AS08G03466-RA,AS04G00953-RA,AS02G00871-RA,AS03G00837-RA,AS09G00870-RA,AS03G02657-RA,AS01G02076-RA,AS11G01716-RA,AS08G02096-RA,AS08G03515-RA,AS06G01052-RA,AS01G03081-RA,AS05G00196-RA,AS09G00208-RA,AS06G03249-RA,AS01G00678-RA,AS04G03…	0.00081721053531
43	BP	GO:0071555	cell wall organization	AS06G02856-RA,AS04G00580-RA,AS01G02601-RA,AS07G00877-RA,AS04G02400-RA,AS10G01519-RA,AS04G02739-RA,AS08G03009-RA,AS05G02139-RA,AS04G02137-RA,AS01G00938-RA,AS04G00249-RA,AS04G00673-RA,AS09G02189-RA,AS04G02432-RA,AS05G00697-RA,AS04G02173-RA,AS07G02417-RA,AS02G03055-RA,AS02G00147-RA,AS03G02925-RA,AS09G02928-RA,AS09G00319-RA,AS06G02176-RA,AS11G01568-RA,AS09G00768-RA,AS02G01008-RA,AS05G00809-RA,AS03G02…	0.00109777672877892
44	BP	GO:0009867	jasmonic acid mediated signaling pathway	AS01G03495-RA,AS04G00608-RA,AS03G00911-RA,AS03G02124-RA,AS02G03383-RA,AS02G03804-RA,AS04G03343-RA,AS04G01928-RA,AS08G01240-RA,AS04G02962-RA,AS11G01504-RA,AS01G01433-RA,AS03G00354-RA,AS09G02126-RA,AS07G00717-RA,AS10G00442-RA,AS05G00901-RA,AS05G02093-RA,AS07G03192-RA,AS10G00617-RA,AS06G01118-RA,AS03G01743-RA,AS02G00852-RA,AS07G00547-RA,AS03G00294-RA,AS07G01388-RA,AS08G01873-RA,AS07G01374-RA,AS11G01…	0.00111413512431321
45	BP	GO:0030001	metal ion transport	AS06G00379-RA,AS07G01198-RA,AS01G01211-RA,AS06G03011-RA,AS11G01276-RA,AS02G01376-RA,AS08G03846-RA,AS06G03056-RA,AS08G01281-RA,AS06G00240-RA,AS08G03804-RA,AS04G00236-RA,AS08G01809-RA,AS06G01070-RA,AS04G01858-RA,AS08G01735-RA,AS10G00030-RA,AS10G02485-RA,AS08G00562-RA,AS02G01503-RA,AS05G03067-RA,AS11G01032-RA,AS08G00226-RA,AS05G03279-RA,AS06G01506-RA,AS08G00585-RA,AS04G02230-RA,AS10G01021-RA,AS01G01…	0.00111413512431321
46	BP	GO:0071229	cellular response to acid chemical	AS01G03495-RA,AS02G02948-RA,AS08G02659-RA,AS07G00405-RA,AS01G01324-RA,AS04G00608-RA,AS07G03345-RA,AS11G00382-RA,AS06G03472-RA,AS09G00635-RA,AS06G03774-RA,AS06G02396-RA,AS01G00075-RA,AS06G02612-RA,AS05G00256-RA,AS08G01893-RA,AS03G00911-RA,AS03G02124-RA,AS01G03194-RA,AS11G01257-RA,AS10G02784-RA,AS02G03804-RA,AS08G00537-RA,AS04G03343-RA,AS06G01506-RA,AS11G00325-RA,AS04G01928-RA,AS10G01718-RA,AS09G00…	0.00124322401185604
47	BP	GO:0080167	response to karrikin	AS09G01753-RA,AS10G00067-RA,AS07G01198-RA,AS06G00410-RA,AS06G03455-RA,AS06G01070-RA,AS10G00030-RA,AS02G02293-RA,AS04G02198-RA,AS10G01992-RA,AS04G03445-RA,AS11G00772-RA,AS04G00469-RA,AS06G01271-RA,AS11G02376-RA,AS03G00354-RA,AS04G02907-RA,AS04G00474-RA,AS05G01498-RA,AS05G00316-RA,AS02G00798-RA,AS07G03326-RA,AS01G03580-RA,AS08G00391-RA,AS04G02680-RA,AS11G01951-RA,AS01G01179-RA,AS11G02641-RA,AS06G00…	0.00132133337904875
48	BP	GO:1905177	tracheary element differentiation	AS03G02131-RA,AS01G03423-RA,AS02G03541-RA,AS03G00690-RA,AS11G00148-RA,AS05G02391-RA,AS04G00551-RA,AS05G01661-RA,AS09G00189-RA	0.00139820396915284
49	BP	GO:0009664	plant-type cell wall organization	AS04G00580-RA,AS07G00877-RA,AS10G01519-RA,AS04G02739-RA,AS08G03009-RA,AS05G02139-RA,AS04G02137-RA,AS04G00249-RA,AS04G02432-RA,AS05G00697-RA,AS04G02173-RA,AS07G02417-RA,AS02G03055-RA,AS02G00147-RA,AS03G02925-RA,AS09G02928-RA,AS09G00319-RA,AS06G02176-RA,AS11G01568-RA,AS09G01812-RA,AS07G02994-RA,AS06G02838-RA,AS10G01250-RA,AS07G00781-RA,AS09G01824-RA,AS06G03666-RA,AS04G03253-RA,AS05G00696-RA,AS05G00…	0.00163340887185111
50	MF	GO:0031409	pigment binding	AS09G02198-RA,AS05G03579-RA,AS10G01176-RA,AS01G03040-RA,AS10G01920-RA,AS07G03326-RA,AS06G01935-RA,AS04G03596-RA,AS09G00108-RA,AS11G00231-RA,AS08G01536-RA,AS11G00119-RA	0.00168561005435024
51	BP	GO:0048759	xylem vessel member cell differentiation	AS03G02131-RA,AS01G03423-RA,AS02G03541-RA,AS03G00690-RA,AS11G00148-RA,AS05G02391-RA,AS04G00551-RA,AS05G01661-RA	0.00185058637724192
52	BP	GO:0009809	lignin biosynthetic process	AS06G03499-RA,AS01G03183-RA,AS01G01384-RA,AS09G00193-RA,AS03G00113-RA,AS06G03538-RA,AS04G02686-RA,AS02G01011-RA,AS11G00901-RA,AS07G00843-RA,AS01G01864-RA,AS08G00542-RA,AS05G00657-RA,AS05G03210-RA,AS07G02808-RA,AS01G01031-RA,AS04G00078-RA,AS05G01554-RA,AS06G01052-RA,AS07G02473-RA,AS06G03766-RA,AS09G00734-RA,AS07G03229-RA	0.00186639702947246
53	BP	GO:0007166	cell surface receptor signaling pathway	AS05G00752-RA,AS07G00405-RA,AS11G02359-RA,AS01G00783-RA,AS03G02955-RA,AS04G03186-RA,AS02G03737-RA,AS05G01315-RA,AS06G03056-RA,AS08G02876-RA,AS02G02484-RA,AS04G00172-RA,AS08G01746-RA,AS02G01491-RA,AS04G02901-RA,AS09G02189-RA,AS10G01508-RA,AS10G01518-RA,AS11G01077-RA,AS10G00991-RA,AS04G01628-RA,AS05G00033-RA,AS01G02459-RA,AS01G02875-RA,AS02G00581-RA,AS03G00102-RA,AS01G02512-RA,AS03G02256-RA,AS06G02…	0.00225632615608123
54	BP	GO:0009751	response to salicylic acid	AS01G03495-RA,AS03G00035-RA,AS05G01829-RA,AS02G00605-RA,AS04G02699-RA,AS07G03050-RA,AS09G01066-RA,AS08G01735-RA,AS02G03612-RA,AS01G01864-RA,AS02G03383-RA,AS11G02173-RA,AS11G01104-RA,AS04G00469-RA,AS05G00901-RA,AS05G02922-RA,AS02G02681-RA,AS05G02093-RA,AS03G00544-RA,AS11G01476-RA,AS07G03192-RA,AS06G01118-RA,AS03G01743-RA,AS04G00474-RA,AS05G03523-RA,AS05G00316-RA,AS05G01648-RA,AS07G03225-RA,AS06G00…	0.00285506489782522
55	BP	GO:1900376	regulation of secondary metabolite biosynthetic process	AS06G03499-RA,AS04G03593-RA,AS09G00193-RA,AS04G02686-RA,AS04G03120-RA,AS06G00996-RA,AS05G00657-RA,AS06G02877-RA,AS04G00078-RA,AS03G01798-RA,AS05G01554-RA,AS06G00990-RA,AS01G00665-RA,AS06G03906-RA,AS09G01366-RA	0.00285506489782522
56	BP	GO:0044036	cell wall macromolecule metabolic process	AS06G02856-RA,AS05G01492-RA,AS11G01636-RA,AS08G03558-RA,AS04G02428-RA,AS06G02320-RA,AS04G00580-RA,AS08G00521-RA,AS07G00877-RA,AS05G00042-RA,AS04G02388-RA,AS04G00249-RA,AS04G00673-RA,AS04G02173-RA,AS11G01586-RA,AS05G03601-RA,AS08G03796-RA,AS06G02176-RA,AS11G01568-RA,AS07G01159-RA,AS06G02838-RA,AS07G01109-RA,AS02G00826-RA,AS10G01250-RA,AS01G02343-RA,AS03G02428-RA,AS04G03253-RA,AS01G03395-RA,AS05G00…	0.00287403439833694
57	BP	GO:0009832	plant-type cell wall biogenesis	AS07G02689-RA,AS11G01454-RA,AS05G01492-RA,AS04G02428-RA,AS01G01384-RA,AS01G03108-RA,AS04G02686-RA,AS01G01251-RA,AS01G01034-RA,AS02G01011-RA,AS05G00042-RA,AS11G00901-RA,AS09G01066-RA,AS05G03241-RA,AS02G03287-RA,AS01G03423-RA,AS04G00249-RA,AS03G00690-RA,AS04G02173-RA,AS08G01558-RA,AS01G03747-RA,AS06G02964-RA,AS07G00843-RA,AS01G01864-RA,AS11G00148-RA,AS06G02176-RA,AS05G01264-RA,AS01G01249-RA,AS02G01…	0.00357179313117399
58	BP	GO:0009738	abscisic acid-activated signaling pathway	AS08G02659-RA,AS01G02601-RA,AS04G02400-RA,AS07G03345-RA,AS05G03378-RA,AS09G00635-RA,AS05G01584-RA,AS06G03774-RA,AS06G02396-RA,AS05G00256-RA,AS01G03194-RA,AS11G01257-RA,AS10G02784-RA,AS08G00537-RA,AS11G00325-RA,AS07G02790-RA,AS10G01718-RA,AS09G00694-RA,AS02G03704-RA,AS04G00469-RA,AS04G02351-RA,AS09G00201-RA,AS08G00830-RA,AS04G00977-RA,AS04G00474-RA,AS11G02119-RA,AS04G02130-RA,AS08G00616-RA,AS07G03…	0.00380108881470478
59	BP	GO:0042542	response to hydrogen peroxide	AS03G00743-RA,AS06G03056-RA,AS03G00476-RA,AS07G03050-RA,AS06G03712-RA,AS01G02682-RA,AS03G02551-RA,AS08G01893-RA,AS08G00202-RA,AS02G00053-RA,AS04G03104-RA,AS04G02487-RA,AS04G01097-RA,AS02G01181-RA,AS02G00885-RA,AS03G00544-RA,AS07G03192-RA,AS01G02948-RA,AS09G02203-RA,AS07G02714-RA,AS07G00439-RA,AS04G02702-RA,AS06G01213-RA,AS04G00298-RA,AS11G02531-RA,AS08G02821-RA,AS06G01411-RA,AS07G03455-RA,AS03G00…	0.00380108881470478
60	BP	GO:0050832	defense response to fungus	AS11G01454-RA,AS01G03495-RA,AS08G01485-RA,AS08G02659-RA,AS07G00478-RA,AS11G01952-RA,AS08G01624-RA,AS03G00035-RA,AS01G02601-RA,AS01G03086-RA,AS04G02400-RA,AS06G03472-RA,AS09G01066-RA,AS06G02396-RA,AS07G01236-RA,AS08G01893-RA,AS03G00911-RA,AS05G01050-RA,AS02G01428-RA,AS07G02417-RA,AS02G03055-RA,AS02G00053-RA,AS02G03383-RA,AS09G02928-RA,AS04G02962-RA,AS05G00901-RA,AS09G00201-RA,AS02G02681-RA,AS05G02…	0.00380108881470478
61	BP	GO:2000022	regulation of jasmonic acid mediated signaling pathway	AS03G00911-RA,AS02G03383-RA,AS08G01240-RA,AS01G01433-RA,AS03G00354-RA,AS09G02126-RA,AS05G00901-RA,AS05G02093-RA,AS10G00617-RA,AS06G01118-RA,AS03G01743-RA,AS07G00547-RA,AS03G00294-RA,AS11G01951-RA,AS06G02726-RA,AS07G00873-RA,AS04G00212-RA,AS03G00382-RA	0.0040992511027374
62	MF	GO:0008324	cation transmembrane transporter activity	AS06G00379-RA,AS10G00067-RA,AS07G01198-RA,AS01G01211-RA,AS03G00739-RA,AS10G00929-RA,AS06G03011-RA,AS02G01376-RA,AS08G03846-RA,AS06G03056-RA,AS08G00460-RA,AS08G01281-RA,AS07G00074-RA,AS06G00240-RA,AS08G03804-RA,AS08G02559-RA,AS06G01070-RA,AS06G01894-RA,AS10G00030-RA,AS03G00499-RA,AS08G00562-RA,AS02G01503-RA,AS07G03177-RA,AS05G03067-RA,AS08G00556-RA,AS02G00475-RA,AS11G01032-RA,AS06G01506-RA,AS03G02…	0.00414755216726695
63	BP	GO:0007018	microtubule-based movement	AS07G01716-RA,AS08G04018-RA,AS03G00311-RA,AS03G01883-RA,AS05G00624-RA,AS04G01543-RA,AS03G00064-RA,AS09G00728-RA,AS01G00532-RA,AS01G00133-RA,AS04G02502-RA,AS04G02101-RA,AS06G00614-RA,AS02G02423-RA,AS01G00050-RA,AS05G00158-RA,AS08G02860-RA,AS07G00333-RA,AS08G03044-RA,AS05G00566-RA,AS04G00416-RA,AS02G03159-RA,AS05G03765-RA,AS07G02994-RA,AS06G02271-RA,AS04G00055-RA,AS05G00801-RA,AS06G00349-RA,AS10G01…	0.00428950408651966
64	MF	GO:0008574	plus-end-directed microtubule motor activity	AS03G01883-RA,AS01G00532-RA,AS06G00614-RA,AS02G02423-RA,AS01G00050-RA,AS05G00158-RA,AS08G02860-RA,AS05G00566-RA,AS07G02994-RA,AS05G00801-RA,AS09G00894-RA	0.00463050406117854
65	BP	GO:0009914	hormone transport	AS01G02059-RA,AS07G01198-RA,AS09G01808-RA,AS01G03108-RA,AS06G01355-RA,AS03G00144-RA,AS03G01775-RA,AS04G02400-RA,AS06G03056-RA,AS06G02985-RA,AS09G03024-RA,AS05G02230-RA,AS08G02559-RA,AS04G03255-RA,AS04G02770-RA,AS03G02131-RA,AS06G01070-RA,AS02G03541-RA,AS10G00030-RA,AS07G03474-RA,AS02G03285-RA,AS06G02964-RA,AS03G00266-RA,AS05G00082-RA,AS07G00855-RA,AS08G02517-RA,AS01G00456-RA,AS04G02022-RA,AS04G00…	0.00496956259776525
66	MF	GO:0003774	cytoskeletal motor activity	AS07G01716-RA,AS08G04018-RA,AS03G00311-RA,AS03G01883-RA,AS05G00624-RA,AS04G01543-RA,AS03G00064-RA,AS09G00728-RA,AS01G00532-RA,AS01G00133-RA,AS04G02502-RA,AS04G02101-RA,AS06G00614-RA,AS03G02551-RA,AS02G02423-RA,AS01G00050-RA,AS05G00158-RA,AS08G02860-RA,AS07G00333-RA,AS08G03044-RA,AS04G03104-RA,AS05G00566-RA,AS02G03159-RA,AS05G03765-RA,AS07G02994-RA,AS05G00801-RA,AS06G00349-RA,AS10G01716-RA,AS09G00…	0.0051322209615057
67	BP	GO:0019932	second-messenger-mediated signaling	AS07G00405-RA,AS11G01276-RA,AS10G00178-RA,AS06G03056-RA,AS07G02064-RA,AS08G01021-RA,AS06G01506-RA,AS02G03704-RA,AS04G02962-RA,AS02G01181-RA,AS01G00022-RA,AS01G02826-RA,AS01G00687-RA,AS04G02413-RA,AS04G01129-RA,AS01G00018-RA,AS10G02562-RA,AS09G02375-RA,AS09G00405-RA,AS01G01742-RA,AS06G00085-RA,AS01G00575-RA,AS04G00613-RA,AS09G00406-RA	0.00556388490039878
68	BP	GO:0071215	cellular response to abscisic acid stimulus	AS08G02659-RA,AS07G00405-RA,AS01G02601-RA,AS04G02400-RA,AS07G03345-RA,AS05G03378-RA,AS06G03472-RA,AS09G00635-RA,AS05G01584-RA,AS06G03774-RA,AS06G02396-RA,AS05G00256-RA,AS01G03194-RA,AS11G01257-RA,AS10G02784-RA,AS08G00537-RA,AS11G00325-RA,AS07G02790-RA,AS10G01718-RA,AS09G00694-RA,AS02G03704-RA,AS04G00469-RA,AS04G02351-RA,AS09G00201-RA,AS08G00830-RA,AS04G00977-RA,AS04G00474-RA,AS11G02119-RA,AS04G02…	0.00559183765221139
69	BP	GO:0097306	cellular response to alcohol	AS08G02659-RA,AS07G00405-RA,AS01G02601-RA,AS04G02400-RA,AS07G03345-RA,AS05G03378-RA,AS06G03472-RA,AS09G00635-RA,AS05G01584-RA,AS06G03774-RA,AS06G02396-RA,AS05G00256-RA,AS01G03194-RA,AS11G01257-RA,AS10G02784-RA,AS08G00537-RA,AS11G00325-RA,AS07G02790-RA,AS10G01718-RA,AS09G00694-RA,AS02G03704-RA,AS04G00469-RA,AS04G02351-RA,AS09G00201-RA,AS08G00830-RA,AS04G00977-RA,AS04G00474-RA,AS11G02119-RA,AS04G02…	0.00559183765221139
70	BP	GO:0043455	regulation of secondary metabolic process	AS06G03499-RA,AS04G03593-RA,AS09G00193-RA,AS04G02686-RA,AS04G03120-RA,AS06G00996-RA,AS05G00657-RA,AS04G00469-RA,AS06G02877-RA,AS04G00078-RA,AS04G00474-RA,AS05G00316-RA,AS03G01798-RA,AS07G01374-RA,AS05G01554-RA,AS08G02838-RA,AS06G00990-RA,AS01G00665-RA,AS10G00710-RA,AS11G01268-RA,AS01G03785-RA,AS06G03906-RA,AS07G03546-RA,AS09G01378-RA,AS09G01366-RA	0.00563327209693831
71	MF	GO:0022890	inorganic cation transmembrane transporter activity	AS06G00379-RA,AS10G00067-RA,AS07G01198-RA,AS01G01211-RA,AS03G00739-RA,AS10G00929-RA,AS06G03011-RA,AS02G01376-RA,AS08G03846-RA,AS06G03056-RA,AS08G00460-RA,AS08G01281-RA,AS07G00074-RA,AS06G00240-RA,AS08G03804-RA,AS08G02559-RA,AS06G01070-RA,AS06G01894-RA,AS10G00030-RA,AS08G00562-RA,AS02G01503-RA,AS07G03177-RA,AS05G03067-RA,AS02G00475-RA,AS11G01032-RA,AS06G01506-RA,AS03G02542-RA,AS04G02230-RA,AS10G01…	0.00579924546943563
72	BP	GO:0023056	positive regulation of signaling	AS02G03765-RA,AS07G00405-RA,AS09G01808-RA,AS08G02658-RA,AS01G02601-RA,AS04G02400-RA,AS06G03056-RA,AS11G00382-RA,AS08G00744-RA,AS01G03176-RA,AS05G01584-RA,AS06G03774-RA,AS05G00256-RA,AS02G03072-RA,AS11G01077-RA,AS03G00266-RA,AS08G01021-RA,AS10G01718-RA,AS11G02192-RA,AS09G01209-RA,AS02G01181-RA,AS08G00754-RA,AS05G00901-RA,AS05G02093-RA,AS03G02256-RA,AS04G00055-RA,AS06G01118-RA,AS03G01743-RA,AS08G00…	0.00600638737460683
73	BP	GO:1900378	positive regulation of secondary metabolite biosynthetic process	AS06G03499-RA,AS04G03593-RA,AS04G03120-RA,AS06G00996-RA,AS05G00657-RA,AS06G02877-RA,AS06G00990-RA,AS01G00665-RA,AS09G01366-RA	0.00600638737460683
74	MF	GO:0008509	anion transmembrane transporter activity	AS07G01198-RA,AS01G01324-RA,AS08G00850-RA,AS01G01288-RA,AS09G00627-RA,AS09G03034-RA,AS07G00004-RA,AS02G00255-RA,AS09G03061-RA,AS08G00395-RA,AS07G02107-RA,AS06G01070-RA,AS07G01467-RA,AS10G00030-RA,AS03G00499-RA,AS02G01503-RA,AS10G00735-RA,AS03G01046-RA,AS03G01421-RA,AS09G00630-RA,AS05G01248-RA,AS07G02064-RA,AS08G00556-RA,AS06G02156-RA,AS05G03476-RA,AS07G01972-RA,AS07G00855-RA,AS05G01082-RA,AS02G03…	0.00641373659703017
75	BP	GO:0045229	external encapsulating structure organization	AS06G02856-RA,AS08G00524-RA,AS04G00580-RA,AS01G02601-RA,AS07G00877-RA,AS04G02400-RA,AS10G01519-RA,AS04G02739-RA,AS08G03009-RA,AS05G02139-RA,AS04G02137-RA,AS01G00938-RA,AS04G00249-RA,AS05G00610-RA,AS04G00673-RA,AS09G02189-RA,AS04G02432-RA,AS05G00697-RA,AS04G02173-RA,AS07G02417-RA,AS02G03055-RA,AS02G00147-RA,AS03G02925-RA,AS09G02928-RA,AS09G00319-RA,AS11G01724-RA,AS06G02176-RA,AS11G01568-RA,AS09G00…	0.00641373659703017
76	MF	GO:0015085	calcium ion transmembrane transporter activity	AS01G01211-RA,AS06G03011-RA,AS06G03056-RA,AS06G01506-RA,AS04G02962-RA,AS02G01181-RA,AS01G00687-RA,AS05G02727-RA,AS04G02413-RA,AS04G00807-RA,AS06G00383-RA,AS04G01129-RA,AS01G01430-RA,AS03G02057-RA,AS02G02965-RA,AS01G02021-RA,AS03G02814-RA,AS09G00405-RA,AS07G01993-RA,AS03G02033-RA,AS01G00575-RA,AS03G02034-RA,AS09G00406-RA,AS02G03783-RA	0.0065048893498496
77	CC	GO:0015630	microtubule cytoskeleton	AS03G00743-RA,AS07G01716-RA,AS08G04018-RA,AS01G02057-RA,AS09G02958-RA,AS03G00311-RA,AS04G00082-RA,AS03G01883-RA,AS05G00624-RA,AS04G01543-RA,AS03G00064-RA,AS09G00728-RA,AS01G02682-RA,AS01G00532-RA,AS04G02221-RA,AS08G03255-RA,AS01G00133-RA,AS04G02502-RA,AS04G02101-RA,AS06G00614-RA,AS04G03199-RA,AS04G02432-RA,AS02G02423-RA,AS01G00050-RA,AS08G00202-RA,AS05G00158-RA,AS02G01485-RA,AS08G02860-RA,AS06G00…	0.00676184762708533
78	BP	GO:0019722	calcium-mediated signaling	AS07G00405-RA,AS11G01276-RA,AS06G03056-RA,AS08G01021-RA,AS06G01506-RA,AS02G03704-RA,AS04G02962-RA,AS02G01181-RA,AS01G00022-RA,AS01G02826-RA,AS01G00687-RA,AS04G02413-RA,AS01G00018-RA,AS10G02562-RA,AS09G02375-RA,AS09G00405-RA,AS01G01742-RA,AS06G00085-RA,AS01G00575-RA,AS04G00613-RA,AS09G00406-RA	0.00697746919113706
79	MF	GO:0004675	transmembrane receptor protein serine/threonine kinase activity	AS05G00752-RA,AS11G02359-RA,AS03G02955-RA,AS04G03186-RA,AS02G03737-RA,AS05G01315-RA,AS08G02876-RA,AS02G02484-RA,AS04G00172-RA,AS08G01746-RA,AS04G02901-RA,AS09G02189-RA,AS10G01508-RA,AS10G01518-RA,AS04G01628-RA,AS05G00033-RA,AS01G02459-RA,AS02G00581-RA,AS03G02256-RA,AS07G00794-RA,AS06G00568-RA,AS06G00081-RA,AS03G00097-RA,AS08G02796-RA,AS06G01071-RA,AS01G02486-RA,AS06G01809-RA,AS02G01539-RA,AS07G01…	0.00706729831594359
80	BP	GO:0006833	water transport	AS03G00739-RA,AS01G02077-RA,AS07G00461-RA,AS02G03055-RA,AS08G01316-RA,AS09G02928-RA,AS06G02457-RA,AS04G03630-RA,AS07G02418-RA,AS08G02948-RA,AS09G01824-RA,AS02G00680-RA,AS02G00246-RA,AS01G01302-RA,AS07G02394-RA,AS02G00136-RA,AS04G00330-RA,AS08G01695-RA,AS01G01268-RA,AS01G02349-RA,AS02G01137-RA,AS02G01214-RA	0.00728871904580536
81	BP	GO:0042044	fluid transport	AS03G00739-RA,AS01G02077-RA,AS07G00461-RA,AS02G03055-RA,AS08G01316-RA,AS09G02928-RA,AS06G02457-RA,AS04G03630-RA,AS07G02418-RA,AS08G02948-RA,AS09G01824-RA,AS02G00680-RA,AS02G00246-RA,AS01G01302-RA,AS07G02394-RA,AS02G00136-RA,AS04G00330-RA,AS08G01695-RA,AS01G01268-RA,AS01G02349-RA,AS02G01137-RA,AS02G01214-RA	0.00728871904580536
82	BP	GO:0007167	enzyme linked receptor protein signaling pathway	AS05G00752-RA,AS11G02359-RA,AS01G00783-RA,AS03G02955-RA,AS04G03186-RA,AS02G03737-RA,AS05G01315-RA,AS08G02876-RA,AS02G02484-RA,AS04G00172-RA,AS08G01746-RA,AS02G01491-RA,AS04G02901-RA,AS09G02189-RA,AS10G01508-RA,AS10G01518-RA,AS04G01628-RA,AS05G00033-RA,AS01G02459-RA,AS01G02875-RA,AS02G00581-RA,AS03G00102-RA,AS03G02256-RA,AS07G00794-RA,AS11G02262-RA,AS07G03191-RA,AS06G00568-RA,AS06G00081-RA,AS03G00…	0.00762581528727269
83	BP	GO:0010383	cell wall polysaccharide metabolic process	AS06G02856-RA,AS05G01492-RA,AS11G01636-RA,AS08G03558-RA,AS04G02428-RA,AS04G00580-RA,AS08G00521-RA,AS07G00877-RA,AS05G00042-RA,AS04G00249-RA,AS04G02173-RA,AS11G01586-RA,AS05G03601-RA,AS08G03796-RA,AS06G02176-RA,AS11G01568-RA,AS06G02838-RA,AS07G01109-RA,AS10G01250-RA,AS01G02343-RA,AS03G02428-RA,AS04G03253-RA,AS01G03395-RA,AS05G00208-RA,AS05G01661-RA,AS05G03053-RA,AS07G03513-RA,AS01G00425-RA,AS07G03…	0.00792471049781359
84	BP	GO:0006816	calcium ion transport	AS01G01211-RA,AS06G03011-RA,AS11G01276-RA,AS06G03056-RA,AS06G01506-RA,AS04G02962-RA,AS02G01181-RA,AS04G00501-RA,AS01G02826-RA,AS01G00687-RA,AS05G02727-RA,AS04G02413-RA,AS04G00807-RA,AS06G00383-RA,AS04G01129-RA,AS01G01430-RA,AS10G01509-RA,AS03G02057-RA,AS02G02965-RA,AS01G02021-RA,AS03G02814-RA,AS09G00405-RA,AS07G01993-RA,AS03G02033-RA,AS01G00575-RA,AS03G02034-RA,AS09G00406-RA,AS02G03783-RA	0.00829248381550537
85	MF	GO:0008061	chitin binding	AS05G00752-RA,AS05G01718-RA,AS02G00581-RA,AS06G01809-RA,AS05G00755-RA,AS05G00754-RA,AS05G00247-RA,AS08G00024-RA	0.00864931480975673
86	BP	GO:1901348	positive regulation of secondary cell wall biogenesis	AS09G01066-RA,AS01G03423-RA,AS03G00690-RA,AS11G00148-RA,AS05G02391-RA,AS07G00220-RA,AS04G00551-RA,AS05G01661-RA	0.00864931480975673
87	BP	GO:1903340	positive regulation of cell wall organization or biogenesis	AS09G01066-RA,AS01G03423-RA,AS03G00690-RA,AS11G00148-RA,AS05G02391-RA,AS07G00220-RA,AS04G00551-RA,AS05G01661-RA	0.00864931480975673
88	BP	GO:0009646	response to absence of light	AS06G01619-RA,AS06G02080-RA,AS08G01893-RA,AS04G00673-RA,AS03G00620-RA,AS05G00082-RA,AS11G01104-RA,AS02G02681-RA,AS11G01476-RA,AS07G03192-RA,AS05G00430-RA,AS02G01827-RA,AS01G02649-RA,AS07G02352-RA,AS01G00215-RA,AS02G01059-RA,AS08G02660-RA,AS02G00926-RA,AS08G00194-RA,AS08G00132-RA,AS06G01714-RA,AS02G00016-RA,AS11G00213-RA	0.00913992464375458
89	BP	GO:0016143	S-glycoside metabolic process	AS06G02568-RA,AS01G03363-RA,AS04G00781-RA,AS06G00582-RA,AS06G03556-RA,AS07G02082-RA,AS08G00537-RA,AS01G03359-RA,AS05G02938-RA,AS02G01008-RA,AS05G02015-RA,AS04G00078-RA,AS03G00837-RA,AS03G01798-RA,AS01G03081-RA,AS05G00196-RA,AS09G00208-RA,AS07G01194-RA,AS01G03360-RA,AS10G01823-RA,AS01G03608-RA,AS02G02928-RA,AS07G01380-RA,AS07G02614-RA,AS03G02748-RA,AS05G00522-RA,AS01G03077-RA,AS04G01915-RA,AS03G03…	0.00913992464375458
90	BP	GO:0019757	glycosinolate metabolic process	AS06G02568-RA,AS01G03363-RA,AS04G00781-RA,AS06G00582-RA,AS06G03556-RA,AS07G02082-RA,AS08G00537-RA,AS01G03359-RA,AS05G02938-RA,AS02G01008-RA,AS05G02015-RA,AS04G00078-RA,AS03G00837-RA,AS03G01798-RA,AS01G03081-RA,AS05G00196-RA,AS09G00208-RA,AS07G01194-RA,AS01G03360-RA,AS10G01823-RA,AS01G03608-RA,AS02G02928-RA,AS07G01380-RA,AS07G02614-RA,AS03G02748-RA,AS05G00522-RA,AS01G03077-RA,AS04G01915-RA,AS03G03…	0.00913992464375458
91	BP	GO:0019760	glucosinolate metabolic process	AS06G02568-RA,AS01G03363-RA,AS04G00781-RA,AS06G00582-RA,AS06G03556-RA,AS07G02082-RA,AS08G00537-RA,AS01G03359-RA,AS05G02938-RA,AS02G01008-RA,AS05G02015-RA,AS04G00078-RA,AS03G00837-RA,AS03G01798-RA,AS01G03081-RA,AS05G00196-RA,AS09G00208-RA,AS07G01194-RA,AS01G03360-RA,AS10G01823-RA,AS01G03608-RA,AS02G02928-RA,AS07G01380-RA,AS07G02614-RA,AS03G02748-RA,AS05G00522-RA,AS01G03077-RA,AS04G01915-RA,AS03G03…	0.00913992464375458
92	BP	GO:0048878	chemical homeostasis	AS01G02059-RA,AS01G03419-RA,AS04G02302-RA,AS07G01198-RA,AS06G02354-RA,AS04G03593-RA,AS04G02523-RA,AS06G03011-RA,AS11G01276-RA,AS01G03086-RA,AS03G01775-RA,AS04G00608-RA,AS08G02195-RA,AS06G03056-RA,AS04G00804-RA,AS05G02230-RA,AS08G03804-RA,AS05G00555-RA,AS08G01809-RA,AS03G02650-RA,AS06G00546-RA,AS06G02080-RA,AS07G00701-RA,AS10G00030-RA,AS03G00499-RA,AS10G02485-RA,AS08G00562-RA,AS09G03090-RA,AS02G01…	0.00913992464375458
93	BP	GO:0010647	positive regulation of cell communication	AS02G03765-RA,AS07G00405-RA,AS09G01808-RA,AS08G02658-RA,AS01G02601-RA,AS04G02400-RA,AS05G03415-RA,AS06G03056-RA,AS11G00382-RA,AS08G00744-RA,AS01G03176-RA,AS05G01584-RA,AS06G03774-RA,AS05G00256-RA,AS02G03072-RA,AS11G01077-RA,AS03G00266-RA,AS08G01021-RA,AS10G01718-RA,AS11G02192-RA,AS09G01209-RA,AS02G01181-RA,AS08G00754-RA,AS05G00901-RA,AS05G02093-RA,AS03G02256-RA,AS04G00055-RA,AS06G01118-RA,AS03G01…	0.00931374594374325
94	BP	GO:0007140	male meiotic nuclear division	AS03G00311-RA,AS09G00446-RA,AS02G00201-RA,AS05G02481-RA,AS07G00333-RA,AS05G00729-RA,AS11G02192-RA,AS09G00600-RA,AS08G01873-RA,AS10G01586-RA,AS01G01202-RA,AS07G02432-RA	0.00965688508690574
95	BP	GO:0010929	positive regulation of auxin mediated signaling pathway	AS09G01808-RA,AS03G00266-RA,AS05G00901-RA,AS05G02093-RA,AS06G01118-RA,AS03G01743-RA,AS03G02849-RA,AS07G00611-RA,AS03G00382-RA,AS07G01277-RA,AS08G01227-RA,AS10G00795-RA	0.00965688508690574
96	BP	GO:0098660	inorganic ion transmembrane transport	AS06G00379-RA,AS10G00067-RA,AS07G01198-RA,AS01G01211-RA,AS03G00739-RA,AS10G00929-RA,AS06G03011-RA,AS11G01276-RA,AS02G01376-RA,AS08G03846-RA,AS06G03056-RA,AS08G00460-RA,AS08G01281-RA,AS07G00074-RA,AS02G00255-RA,AS06G00240-RA,AS08G03804-RA,AS06G01070-RA,AS07G01467-RA,AS04G01858-RA,AS10G00030-RA,AS02G01503-RA,AS07G03177-RA,AS05G03067-RA,AS07G02064-RA,AS02G00475-RA,AS11G01032-RA,AS06G01506-RA,AS07G01…	0.00965688508690574
97	BP	GO:0009404	toxin metabolic process	AS02G02948-RA,AS04G03593-RA,AS10G00416-RA,AS04G03120-RA,AS10G02600-RA,AS11G02363-RA,AS06G02877-RA,AS08G00391-RA,AS01G00665-RA,AS01G03608-RA,AS07G01160-RA,AS11G02355-RA,AS01G01230-RA,AS09G00733-RA,AS09G01366-RA,AS01G00297-RA,AS01G03033-RA	0.00965900241240015
98	BP	GO:0007178	transmembrane receptor protein serine/threonine kinase signaling pathway	AS05G00752-RA,AS11G02359-RA,AS03G02955-RA,AS04G03186-RA,AS02G03737-RA,AS05G01315-RA,AS08G02876-RA,AS02G02484-RA,AS04G00172-RA,AS08G01746-RA,AS04G02901-RA,AS09G02189-RA,AS10G01508-RA,AS10G01518-RA,AS04G01628-RA,AS05G00033-RA,AS01G02459-RA,AS01G02875-RA,AS02G00581-RA,AS03G02256-RA,AS07G00794-RA,AS07G03191-RA,AS06G00568-RA,AS06G00081-RA,AS03G00097-RA,AS08G02796-RA,AS06G01071-RA,AS01G02486-RA,AS06G01…	0.00995530329951204
99	BP	GO:0010089	xylem development	AS06G03499-RA,AS05G02371-RA,AS02G00201-RA,AS03G02131-RA,AS02G03287-RA,AS01G03423-RA,AS02G03541-RA,AS03G00690-RA,AS03G02124-RA,AS05G00657-RA,AS11G00148-RA,AS01G03414-RA,AS08G00143-RA,AS05G02391-RA,AS04G00551-RA,AS05G01661-RA,AS08G03800-RA,AS01G00047-RA,AS01G01272-RA,AS01G00703-RA,AS06G03670-RA,AS09G00189-RA	0.0107014917760034
100	BP	GO:0048584	positive regulation of response to stimulus	AS01G03495-RA,AS02G03765-RA,AS03G00743-RA,AS07G00405-RA,AS09G01808-RA,AS07G02423-RA,AS08G02658-RA,AS03G02955-RA,AS04G03186-RA,AS01G02601-RA,AS03G01775-RA,AS04G02400-RA,AS05G03415-RA,AS06G03056-RA,AS07G03345-RA,AS11G00382-RA,AS05G01147-RA,AS08G00744-RA,AS01G03176-RA,AS01G02682-RA,AS05G01584-RA,AS06G03774-RA,AS05G02019-RA,AS05G00256-RA,AS02G03072-RA,AS08G00202-RA,AS11G01077-RA,AS02G00053-RA,AS02G03…	0.0107344327396915
101	BP	GO:0009808	lignin metabolic process	AS06G03499-RA,AS01G03183-RA,AS01G01384-RA,AS09G00193-RA,AS03G00113-RA,AS06G03538-RA,AS04G02686-RA,AS02G01011-RA,AS11G00901-RA,AS07G00843-RA,AS01G01864-RA,AS08G00542-RA,AS05G00657-RA,AS05G03210-RA,AS07G02808-RA,AS01G01031-RA,AS04G00078-RA,AS05G01554-RA,AS06G01052-RA,AS07G02473-RA,AS06G03766-RA,AS09G00734-RA,AS07G03229-RA	0.0108730180442438
102	BP	GO:0098813	nuclear chromosome segregation	AS04G02502-RA,AS06G00614-RA,AS06G01668-RA,AS01G00050-RA,AS02G03072-RA,AS08G02946-RA,AS10G01395-RA,AS02G01485-RA,AS04G02005-RA,AS03G02629-RA,AS02G02110-RA,AS06G03409-RA,AS07G02472-RA,AS06G03008-RA,AS05G02678-RA,AS01G03125-RA,AS09G00600-RA,AS08G00297-RA,AS11G00424-RA,AS07G02994-RA,AS10G01952-RA,AS07G02616-RA,AS04G02565-RA,AS11G00844-RA,AS01G00063-RA,AS06G02179-RA,AS10G01586-RA,AS06G00349-RA,AS09G00…	0.0116823724895868
103	BP	GO:0098656	anion transmembrane transport	AS01G01324-RA,AS08G00850-RA,AS01G01288-RA,AS09G00627-RA,AS09G03034-RA,AS07G00004-RA,AS02G00255-RA,AS09G03061-RA,AS08G00395-RA,AS07G02107-RA,AS07G01467-RA,AS09G02189-RA,AS03G00499-RA,AS02G01503-RA,AS10G00735-RA,AS03G01046-RA,AS01G01378-RA,AS03G01421-RA,AS09G00630-RA,AS05G01248-RA,AS07G02064-RA,AS08G00556-RA,AS06G02156-RA,AS05G03476-RA,AS05G00082-RA,AS10G01718-RA,AS07G01972-RA,AS07G00855-RA,AS05G01…	0.0119247670130974
104	MF	GO:0030246	carbohydrate binding	AS08G02807-RA,AS09G00741-RA,AS02G03395-RA,AS05G00235-RA,AS08G02163-RA,AS04G02739-RA,AS07G03048-RA,AS06G01513-RA,AS02G01865-RA,AS02G03397-RA,AS02G02346-RA,AS03G00319-RA,AS08G02511-RA,AS10G01587-RA,AS01G00070-RA,AS11G01285-RA,AS04G03663-RA,AS02G03764-RA,AS01G00255-RA,AS09G02131-RA,AS07G00781-RA,AS06G00073-RA,AS02G00792-RA,AS08G00356-RA,AS04G00009-RA,AS08G02530-RA,AS07G03513-RA,AS01G01905-RA,AS04G03…	0.0127535348161239
105	BP	GO:0010143	cutin biosynthetic process	AS08G00240-RA,AS07G02823-RA,AS06G03455-RA,AS02G00410-RA,AS07G00850-RA,AS01G01395-RA,AS11G01840-RA,AS11G02539-RA,AS04G03708-RA,AS01G01747-RA,AS04G03709-RA,AS06G00770-RA,AS04G00007-RA,AS01G01392-RA,AS08G02460-RA	0.0131965461114057
106	BP	GO:1903338	regulation of cell wall organization or biogenesis	AS04G02686-RA,AS03G00064-RA,AS09G01066-RA,AS02G03287-RA,AS01G03423-RA,AS03G00690-RA,AS01G01864-RA,AS11G00148-RA,AS05G01264-RA,AS02G01081-RA,AS05G02391-RA,AS08G00495-RA,AS07G00220-RA,AS04G00551-RA,AS05G01661-RA	0.0131965461114057
107	BP	GO:0009787	regulation of abscisic acid-activated signaling pathway	AS01G02601-RA,AS04G02400-RA,AS05G03378-RA,AS05G01584-RA,AS06G03774-RA,AS05G00256-RA,AS10G02784-RA,AS08G00537-RA,AS07G02790-RA,AS10G01718-RA,AS04G00469-RA,AS04G02351-RA,AS09G00201-RA,AS04G00977-RA,AS04G00474-RA,AS11G02119-RA,AS08G00616-RA,AS07G01298-RA,AS05G00316-RA,AS03G02731-RA,AS08G02566-RA,AS01G02337-RA,AS07G02146-RA,AS10G01823-RA,AS05G01433-RA,AS02G02928-RA,AS07G01380-RA,AS03G02926-RA,AS03G02…	0.0139254508337512
108	BP	GO:1901419	regulation of response to alcohol	AS01G02601-RA,AS04G02400-RA,AS05G03378-RA,AS05G01584-RA,AS06G03774-RA,AS05G00256-RA,AS10G02784-RA,AS08G00537-RA,AS07G02790-RA,AS10G01718-RA,AS04G00469-RA,AS04G02351-RA,AS09G00201-RA,AS04G00977-RA,AS04G00474-RA,AS11G02119-RA,AS08G00616-RA,AS07G01298-RA,AS05G00316-RA,AS03G02731-RA,AS08G02566-RA,AS01G02337-RA,AS07G02146-RA,AS10G01823-RA,AS05G01433-RA,AS02G02928-RA,AS07G01380-RA,AS03G02926-RA,AS03G02…	0.0139254508337512
109	BP	GO:1905957	regulation of cellular response to alcohol	AS01G02601-RA,AS04G02400-RA,AS05G03378-RA,AS05G01584-RA,AS06G03774-RA,AS05G00256-RA,AS10G02784-RA,AS08G00537-RA,AS07G02790-RA,AS10G01718-RA,AS04G00469-RA,AS04G02351-RA,AS09G00201-RA,AS04G00977-RA,AS04G00474-RA,AS11G02119-RA,AS08G00616-RA,AS07G01298-RA,AS05G00316-RA,AS03G02731-RA,AS08G02566-RA,AS01G02337-RA,AS07G02146-RA,AS10G01823-RA,AS05G01433-RA,AS02G02928-RA,AS07G01380-RA,AS03G02926-RA,AS03G02…	0.0139254508337512
110	BP	GO:0060918	auxin transport	AS01G02059-RA,AS07G01198-RA,AS09G01808-RA,AS01G03108-RA,AS06G01355-RA,AS03G00144-RA,AS03G01775-RA,AS04G02400-RA,AS06G02985-RA,AS09G03024-RA,AS05G02230-RA,AS08G02559-RA,AS04G03255-RA,AS04G02770-RA,AS03G02131-RA,AS06G01070-RA,AS02G03541-RA,AS10G00030-RA,AS07G03474-RA,AS02G03285-RA,AS06G02964-RA,AS03G00266-RA,AS05G00082-RA,AS07G00855-RA,AS08G02517-RA,AS01G00456-RA,AS06G01670-RA,AS07G02771-RA,AS09G03…	0.014012903541623
111	MF	GO:0000981	DNA-binding transcription factor activity, RNA polymerase II-specific	AS03G01775-RA,AS05G01829-RA,AS10G00386-RA,AS07G02823-RA,AS02G00605-RA,AS01G03138-RA,AS04G02699-RA,AS09G01066-RA,AS02G03612-RA,AS09G01823-RA,AS01G01864-RA,AS11G02173-RA,AS03G01225-RA,AS04G00469-RA,AS05G01264-RA,AS04G00073-RA,AS05G00901-RA,AS11G01497-RA,AS05G02093-RA,AS01G01436-RA,AS06G01118-RA,AS03G01743-RA,AS04G00474-RA,AS04G00316-RA,AS10G02880-RA,AS05G00316-RA,AS05G01648-RA,AS07G01374-RA,AS01G03…	0.0144323952251805
112	BP	GO:0002239	response to oomycetes	AS01G02601-RA,AS08G01735-RA,AS05G00459-RA,AS06G00721-RA,AS11G01104-RA,AS01G02260-RA,AS02G02681-RA,AS11G01476-RA,AS08G02566-RA,AS05G00401-RA,AS06G01908-RA,AS02G00926-RA,AS06G02252-RA,AS08G00194-RA,AS08G00132-RA,AS09G00011-RA,AS11G01842-RA,AS08G02567-RA,AS06G02251-RA,AS02G00016-RA,AS10G02265-RA,AS01G03184-RA,AS04G00731-RA,AS06G00752-RA,AS04G03278-RA	0.0161046331107694
113	CC	GO:0009897	external side of plasma membrane	AS08G02807-RA,AS09G00627-RA,AS07G00639-RA,AS09G00630-RA,AS11G02145-RA,AS04G03322-RA,AS04G02987-RA,AS11G02147-RA,AS05G01190-RA	0.0161046331107694
114	MF	GO:0016899	oxidoreductase activity, acting on the CH-OH group of donors, oxygen as acceptor	AS08G01310-RA,AS02G01428-RA,AS03G01881-RA,AS02G03347-RA,AS08G01437-RA,AS02G03344-RA,AS11G01469-RA,AS01G00136-RA,AS06G01703-RA,AS09G01990-RA	0.0161046331107694
115	BP	GO:0070588	calcium ion transmembrane transport	AS01G01211-RA,AS06G03011-RA,AS11G01276-RA,AS06G03056-RA,AS06G01506-RA,AS04G02962-RA,AS02G01181-RA,AS01G02826-RA,AS01G00687-RA,AS05G02727-RA,AS04G02413-RA,AS04G00807-RA,AS06G00383-RA,AS04G01129-RA,AS01G01430-RA,AS03G02057-RA,AS02G02965-RA,AS01G02021-RA,AS03G02814-RA,AS09G00405-RA,AS07G01993-RA,AS03G02033-RA,AS01G00575-RA,AS03G02034-RA,AS09G00406-RA,AS02G03783-RA	0.0161046331107694
116	BP	GO:0006820	anion transport	AS01G01324-RA,AS08G00850-RA,AS01G01288-RA,AS09G00627-RA,AS04G02686-RA,AS09G03034-RA,AS07G00004-RA,AS06G03056-RA,AS02G00255-RA,AS09G03061-RA,AS08G00395-RA,AS07G02107-RA,AS07G01467-RA,AS03G02650-RA,AS08G01735-RA,AS09G02189-RA,AS03G00499-RA,AS09G01955-RA,AS02G01503-RA,AS10G00735-RA,AS07G01556-RA,AS03G01046-RA,AS02G02929-RA,AS01G01378-RA,AS03G01421-RA,AS09G00630-RA,AS05G01248-RA,AS07G02064-RA,AS08G00…	0.0179332781210653
117	BP	GO:0009637	response to blue light	AS06G01355-RA,AS06G03884-RA,AS06G01619-RA,AS08G03373-RA,AS06G03899-RA,AS09G02198-RA,AS05G00082-RA,AS09G00694-RA,AS05G03579-RA,AS11G01104-RA,AS04G00686-RA,AS11G02376-RA,AS04G02674-RA,AS08G03399-RA,AS02G02681-RA,AS10G02144-RA,AS11G01476-RA,AS07G03192-RA,AS10G02794-RA,AS08G00616-RA,AS07G03628-RA,AS08G01217-RA,AS02G01607-RA,AS01G00215-RA,AS09G00108-RA,AS02G00926-RA,AS08G00194-RA,AS03G01660-RA,AS02G00…	0.0183337202086257
118	BP	GO:0009967	positive regulation of signal transduction	AS02G03765-RA,AS07G00405-RA,AS09G01808-RA,AS08G02658-RA,AS01G02601-RA,AS04G02400-RA,AS11G00382-RA,AS08G00744-RA,AS01G03176-RA,AS05G01584-RA,AS06G03774-RA,AS05G00256-RA,AS02G03072-RA,AS11G01077-RA,AS03G00266-RA,AS08G01021-RA,AS10G01718-RA,AS11G02192-RA,AS09G01209-RA,AS08G00754-RA,AS05G00901-RA,AS05G02093-RA,AS03G02256-RA,AS06G01118-RA,AS03G01743-RA,AS08G00616-RA,AS07G01298-RA,AS10G01045-RA,AS05G02…	0.0228526151647954
119	MF	GO:0046527	glucosyltransferase activity	AS01G00663-RA,AS11G01454-RA,AS05G01492-RA,AS06G00410-RA,AS01G01034-RA,AS05G00042-RA,AS01G02014-RA,AS04G02915-RA,AS05G01755-RA,AS05G00697-RA,AS06G01366-RA,AS04G03404-RA,AS08G01558-RA,AS06G03772-RA,AS01G02730-RA,AS01G02015-RA,AS04G02932-RA,AS06G02143-RA,AS10G00765-RA,AS02G03148-RA,AS08G03750-RA,AS04G02917-RA,AS03G02646-RA,AS02G01728-RA,AS10G02988-RA,AS04G01599-RA,AS06G02474-RA,AS03G02763-RA,AS07G02…	0.0240432853797305
120	BP	GO:0042447	hormone catabolic process	AS05G03772-RA,AS01G02028-RA,AS09G01022-RA,AS03G00755-RA,AS02G03540-RA,AS06G01691-RA,AS02G02722-RA,AS11G02533-RA,AS01G03184-RA,AS10G02720-RA,AS06G00752-RA,AS01G03026-RA,AS04G03078-RA	0.0245935850489741
121	BP	GO:0098655	cation transmembrane transport	AS06G00379-RA,AS10G00067-RA,AS07G01198-RA,AS01G01211-RA,AS03G00739-RA,AS10G00929-RA,AS06G03011-RA,AS11G01276-RA,AS02G01376-RA,AS08G03846-RA,AS06G03056-RA,AS08G00460-RA,AS08G01281-RA,AS07G00074-RA,AS06G00240-RA,AS08G03804-RA,AS06G01070-RA,AS06G01894-RA,AS10G00030-RA,AS03G00499-RA,AS08G00562-RA,AS02G01503-RA,AS07G03177-RA,AS05G03067-RA,AS08G00556-RA,AS02G00475-RA,AS11G01032-RA,AS06G01506-RA,AS03G02…	0.0245935850489741
122	BP	GO:1902456	regulation of stomatal opening	AS05G00256-RA,AS01G02459-RA,AS10G01718-RA,AS11G02119-RA,AS08G02796-RA,AS02G03321-RA,AS01G00059-RA	0.0245935850489741
123	BP	GO:0000160	phosphorelay signal transduction system	AS04G02400-RA,AS06G03556-RA,AS10G01128-RA,AS04G02560-RA,AS03G02650-RA,AS07G01556-RA,AS02G02929-RA,AS04G01928-RA,AS02G02709-RA,AS06G00996-RA,AS11G01504-RA,AS10G00126-RA,AS01G01793-RA,AS08G01941-RA,AS08G00830-RA,AS06G00983-RA,AS01G03681-RA,AS05G00005-RA,AS02G03455-RA,AS07G01388-RA,AS02G03155-RA,AS11G01505-RA,AS06G00990-RA,AS02G02678-RA,AS03G01930-RA,AS04G00007-RA,AS05G00375-RA,AS07G03360-RA,AS02G01…	0.0255211411262957
124	BP	GO:0007135	meiosis II	AS09G00446-RA,AS02G03072-RA,AS08G02946-RA,AS03G02629-RA,AS05G00729-RA,AS06G03409-RA,AS04G02565-RA,AS01G01975-RA,AS01G01202-RA	0.0265721353683037
125	BP	GO:0061983	meiosis II cell cycle process	AS09G00446-RA,AS02G03072-RA,AS08G02946-RA,AS03G02629-RA,AS05G00729-RA,AS06G03409-RA,AS04G02565-RA,AS01G01975-RA,AS01G01202-RA	0.0265721353683037
126	BP	GO:0098662	inorganic cation transmembrane transport	AS06G00379-RA,AS10G00067-RA,AS07G01198-RA,AS01G01211-RA,AS03G00739-RA,AS10G00929-RA,AS06G03011-RA,AS11G01276-RA,AS02G01376-RA,AS08G03846-RA,AS06G03056-RA,AS08G00460-RA,AS08G01281-RA,AS07G00074-RA,AS06G00240-RA,AS08G03804-RA,AS06G01070-RA,AS10G00030-RA,AS02G01503-RA,AS07G03177-RA,AS05G03067-RA,AS02G00475-RA,AS11G01032-RA,AS06G01506-RA,AS03G02542-RA,AS04G02230-RA,AS10G01021-RA,AS01G01339-RA,AS04G02…	0.0266497785430277
127	BP	GO:0042742	defense response to bacterium	AS10G02379-RA,AS11G01454-RA,AS01G03794-RA,AS01G03495-RA,AS01G02584-RA,AS03G02955-RA,AS04G03186-RA,AS07G02060-RA,AS01G02601-RA,AS06G03011-RA,AS10G00422-RA,AS01G03086-RA,AS04G02400-RA,AS07G00004-RA,AS06G03178-RA,AS06G02396-RA,AS07G01236-RA,AS03G02650-RA,AS08G01893-RA,AS03G00911-RA,AS09G02189-RA,AS10G02026-RA,AS07G00514-RA,AS02G03055-RA,AS07G01556-RA,AS02G00053-RA,AS06G02432-RA,AS03G02684-RA,AS02G02…	0.0300981002653671
128	BP	GO:0042445	hormone metabolic process	AS02G01929-RA,AS04G02302-RA,AS02G02948-RA,AS01G03108-RA,AS04G02523-RA,AS06G01231-RA,AS04G00608-RA,AS04G00804-RA,AS09G03024-RA,AS04G02560-RA,AS11G00382-RA,AS05G03772-RA,AS01G02014-RA,AS01G02028-RA,AS01G00075-RA,AS06G02612-RA,AS10G00967-RA,AS06G02080-RA,AS09G01022-RA,AS04G02574-RA,AS10G02852-RA,AS09G03090-RA,AS04G03360-RA,AS11G01933-RA,AS06G02964-RA,AS01G01317-RA,AS10G00532-RA,AS09G02321-RA,AS01G02…	0.0316173437190828
129	BP	GO:0007389	pattern specification process	AS08G01912-RA,AS09G00627-RA,AS04G02686-RA,AS03G01775-RA,AS10G00178-RA,AS04G00804-RA,AS05G02230-RA,AS11G00382-RA,AS11G02591-RA,AS09G02047-RA,AS03G00004-RA,AS04G03255-RA,AS06G03472-RA,AS05G00555-RA,AS04G02770-RA,AS02G01228-RA,AS05G00775-RA,AS02G01491-RA,AS04G02436-RA,AS01G01334-RA,AS01G03797-RA,AS02G03055-RA,AS07G03474-RA,AS11G01077-RA,AS09G00630-RA,AS08G02929-RA,AS03G01842-RA,AS09G02928-RA,AS07G00…	0.0323657815393997
130	MF	GO:0034485	phosphatidylinositol-3,4,5-trisphosphate 5-phosphatase activity	AS05G01966-RA,AS08G00884-RA,AS10G00576-RA,AS10G00178-RA,AS02G02922-RA,AS11G01202-RA,AS08G02301-RA,AS04G00859-RA,AS09G00126-RA,AS07G01551-RA,AS04G03639-RA	0.0323657815393997
131	MF	GO:0034594	phosphatidylinositol trisphosphate phosphatase activity	AS05G01966-RA,AS08G00884-RA,AS10G00576-RA,AS10G00178-RA,AS02G02922-RA,AS11G01202-RA,AS08G02301-RA,AS04G00859-RA,AS09G00126-RA,AS07G01551-RA,AS04G03639-RA	0.0323657815393997
132	CC	GO:0048046	apoplast	AS06G03499-RA,AS04G00580-RA,AS08G00521-RA,AS07G01936-RA,AS04G02739-RA,AS07G01061-RA,AS01G00336-RA,AS03G00476-RA,AS08G03373-RA,AS09G03117-RA,AS05G00044-RA,AS08G00706-RA,AS11G02386-RA,AS02G01428-RA,AS05G03610-RA,AS01G01557-RA,AS06G03899-RA,AS05G03112-RA,AS09G02198-RA,AS05G03601-RA,AS02G03285-RA,AS06G01228-RA,AS09G00052-RA,AS07G01798-RA,AS05G00991-RA,AS04G02487-RA,AS03G02786-RA,AS07G02190-RA,AS05G00…	0.0323657815393997
133	BP	GO:1902749	regulation of cell cycle G2/M phase transition	AS07G03537-RA,AS04G02952-RA,AS11G01950-RA,AS01G03800-RA,AS07G00170-RA,AS02G03623-RA,AS06G02103-RA,AS08G01730-RA,AS09G01586-RA,AS02G01509-RA,AS05G01087-RA	0.0323657815393997
134	MF	GO:0015079	potassium ion transmembrane transporter activity	AS07G01198-RA,AS02G01376-RA,AS08G01281-RA,AS06G01070-RA,AS10G00030-RA,AS02G01503-RA,AS11G01032-RA,AS10G01021-RA,AS01G01339-RA,AS03G00591-RA,AS02G01126-RA,AS08G00092-RA,AS08G01392-RA,AS02G00531-RA,AS06G00383-RA,AS04G02680-RA,AS04G01129-RA,AS01G03715-RA,AS04G03251-RA,AS03G00897-RA,AS08G00891-RA,AS10G00204-RA,AS10G02706-RA,AS11G01539-RA,AS10G00203-RA,AS08G02610-RA,AS01G02112-RA,AS04G01331-RA,AS07G00…	0.0329940154601795
135	BP	GO:0048646	anatomical structure formation involved in morphogenesis	AS02G01929-RA,AS10G00067-RA,AS07G00405-RA,AS03G02140-RA,AS04G00772-RA,AS08G00524-RA,AS07G02423-RA,AS08G02658-RA,AS03G00311-RA,AS02G03737-RA,AS04G02686-RA,AS03G01775-RA,AS05G02371-RA,AS05G01898-RA,AS09G03024-RA,AS05G02230-RA,AS11G00382-RA,AS04G01543-RA,AS06G03472-RA,AS04G00172-RA,AS07G03537-RA,AS06G02396-RA,AS04G02221-RA,AS08G03255-RA,AS04G03615-RA,AS01G00683-RA,AS05G00610-RA,AS08G01008-RA,AS04G02…	0.0329940154601795
136	MF	GO:0030247	polysaccharide binding	AS08G02807-RA,AS09G00741-RA,AS05G00235-RA,AS04G02739-RA,AS07G03048-RA,AS02G01865-RA,AS02G02346-RA,AS03G00319-RA,AS08G02511-RA,AS10G01587-RA,AS01G00070-RA,AS04G03663-RA,AS01G00255-RA,AS09G02131-RA,AS07G00781-RA,AS02G00792-RA,AS04G00009-RA,AS08G02530-RA,AS07G03513-RA,AS01G01905-RA,AS04G03498-RA,AS10G02172-RA	0.0343234136705668
137	BP	GO:0045132	meiotic chromosome segregation	AS06G01668-RA,AS02G03072-RA,AS08G02946-RA,AS02G01485-RA,AS04G02005-RA,AS03G02629-RA,AS06G03409-RA,AS07G02472-RA,AS06G03008-RA,AS09G00600-RA,AS11G00424-RA,AS04G02565-RA,AS06G02179-RA,AS10G01586-RA,AS09G00894-RA,AS06G02632-RA,AS02G02495-RA,AS10G01076-RA	0.0343234136705668
138	BP	GO:0009765	photosynthesis, light harvesting	AS09G02198-RA,AS11G02428-RA,AS05G03579-RA,AS10G01176-RA,AS01G03040-RA,AS10G01920-RA,AS07G03326-RA,AS06G01935-RA,AS04G03596-RA,AS09G00108-RA,AS11G00231-RA,AS01G00677-RA,AS08G01536-RA,AS11G00119-RA	0.0356295425811654
139	BP	GO:0009624	response to nematode	AS08G03684-RA,AS07G01198-RA,AS06G01355-RA,AS08G00850-RA,AS01G03349-RA,AS04G01287-RA,AS11G02048-RA,AS11G02591-RA,AS05G01174-RA,AS04G02221-RA,AS10G00030-RA,AS06G00575-RA,AS05G01248-RA,AS07G00855-RA,AS02G03707-RA,AS11G01724-RA,AS01G03406-RA,AS01G01231-RA,AS03G00527-RA,AS05G00054-RA,AS02G00531-RA,AS08G03753-RA,AS04G03682-RA,AS01G01430-RA,AS10G01082-RA,AS10G00204-RA,AS02G00644-RA,AS10G02706-RA,AS05G01…	0.0357287781456143
140	BP	GO:0051552	flavone metabolic process	AS01G03183-RA,AS06G00410-RA,AS02G03285-RA,AS05G03210-RA,AS01G01031-RA,AS06G01670-RA,AS02G01400-RA,AS06G03787-RA,AS06G03906-RA,AS01G03184-RA,AS06G00752-RA,AS10G02177-RA	0.0374736128293614
141	BP	GO:0051553	flavone biosynthetic process	AS01G03183-RA,AS06G00410-RA,AS02G03285-RA,AS05G03210-RA,AS01G01031-RA,AS06G01670-RA,AS02G01400-RA,AS06G03787-RA,AS06G03906-RA,AS01G03184-RA,AS06G00752-RA,AS10G02177-RA	0.0374736128293614
142	BP	GO:0009627	systemic acquired resistance	AS01G03495-RA,AS09G03117-RA,AS06G02679-RA,AS02G03383-RA,AS05G00082-RA,AS08G03796-RA,AS11G01039-RA,AS05G02262-RA,AS04G00078-RA,AS07G03600-RA,AS08G02566-RA,AS10G00112-RA,AS08G01873-RA,AS01G03496-RA,AS11G00028-RA,AS03G00901-RA,AS08G02932-RA,AS07G02432-RA,AS02G03684-RA,AS01G01546-RA,AS09G00011-RA,AS08G02567-RA,AS10G02265-RA,AS08G01990-RA	0.0389913281924803
143	MF	GO:0005516	calmodulin binding	AS07G00405-RA,AS04G02788-RA,AS07G00408-RA,AS04G01988-RA,AS07G03345-RA,AS07G03050-RA,AS06G02396-RA,AS04G03111-RA,AS05G03515-RA,AS01G03194-RA,AS08G01475-RA,AS03G00859-RA,AS07G00411-RA,AS10G01195-RA,AS11G00325-RA,AS04G03594-RA,AS08G01090-RA,AS05G00628-RA,AS07G03231-RA,AS05G00287-RA,AS08G00989-RA,AS04G02130-RA,AS09G02706-RA,AS08G02743-RA,AS04G01999-RA,AS08G01476-RA,AS04G00807-RA,AS06G03644-RA,AS08G02…	0.0406179137055121
144	BP	GO:0006928	movement of cell or subcellular component	AS07G00405-RA,AS07G01716-RA,AS04G00772-RA,AS08G04018-RA,AS03G00311-RA,AS01G00783-RA,AS11G01276-RA,AS03G01883-RA,AS05G00624-RA,AS04G01543-RA,AS03G00064-RA,AS09G00728-RA,AS01G00532-RA,AS01G00133-RA,AS04G02502-RA,AS04G02101-RA,AS06G00614-RA,AS03G02551-RA,AS02G02423-RA,AS01G00050-RA,AS05G00158-RA,AS08G02860-RA,AS07G00333-RA,AS08G03044-RA,AS04G03104-RA,AS05G00566-RA,AS04G00416-RA,AS02G03159-RA,AS05G03…	0.0406179137055121
145	BP	GO:0000280	nuclear division	AS03G00311-RA,AS09G00446-RA,AS02G00201-RA,AS04G01543-RA,AS04G02221-RA,AS01G02941-RA,AS04G02502-RA,AS11G02060-RA,AS06G00614-RA,AS06G01668-RA,AS01G00050-RA,AS02G03072-RA,AS08G02946-RA,AS10G01395-RA,AS02G01485-RA,AS05G02481-RA,AS06G00575-RA,AS07G00333-RA,AS04G02005-RA,AS03G02629-RA,AS05G00729-RA,AS11G02192-RA,AS06G03409-RA,AS07G02472-RA,AS01G03406-RA,AS06G03008-RA,AS05G02678-RA,AS09G00600-RA,AS08G00…	0.0431409021956519
146	BP	GO:0006813	potassium ion transport	AS07G01198-RA,AS11G01276-RA,AS02G01376-RA,AS08G01281-RA,AS08G01809-RA,AS06G01070-RA,AS10G00030-RA,AS02G01503-RA,AS11G01032-RA,AS08G00585-RA,AS10G01021-RA,AS01G01339-RA,AS03G00591-RA,AS06G00878-RA,AS01G02826-RA,AS02G01126-RA,AS08G00092-RA,AS08G01392-RA,AS02G00531-RA,AS06G00383-RA,AS04G02680-RA,AS04G01129-RA,AS01G03715-RA,AS04G03251-RA,AS03G00897-RA,AS08G00891-RA,AS10G00204-RA,AS10G02706-RA,AS11G01…	0.0431409021956519
147	BP	GO:0009739	response to gibberellin	AS02G02948-RA,AS01G00336-RA,AS02G00605-RA,AS07G03050-RA,AS10G00416-RA,AS06G02612-RA,AS09G01817-RA,AS08G00537-RA,AS11G02363-RA,AS06G03230-RA,AS06G01742-RA,AS05G00901-RA,AS05G03296-RA,AS05G02093-RA,AS07G02994-RA,AS06G01118-RA,AS03G01743-RA,AS02G02023-RA,AS07G03167-RA,AS09G02843-RA,AS05G01648-RA,AS08G00705-RA,AS08G00124-RA,AS07G01374-RA,AS09G01944-RA,AS10G01823-RA,AS10G00710-RA,AS07G01380-RA,AS07G02…	0.0431409021956519
148	BP	GO:0017000	antibiotic biosynthetic process	AS06G00410-RA,AS04G01687-RA,AS03G00710-RA,AS08G00830-RA,AS08G02566-RA,AS10G00112-RA,AS01G00136-RA,AS08G02567-RA,AS10G02265-RA,AS01G00918-RA,AS06G01703-RA	0.0431409021956519
149	BP	GO:0000302	response to reactive oxygen species	AS03G00743-RA,AS05G00750-RA,AS07G02060-RA,AS11G00990-RA,AS06G03056-RA,AS01G02277-RA,AS01G02273-RA,AS03G00476-RA,AS07G03050-RA,AS06G03712-RA,AS01G02682-RA,AS01G00075-RA,AS10G01416-RA,AS08G01735-RA,AS03G02551-RA,AS08G01893-RA,AS08G00202-RA,AS02G00053-RA,AS04G02942-RA,AS04G03104-RA,AS05G00082-RA,AS04G02487-RA,AS06G00996-RA,AS04G01097-RA,AS02G01181-RA,AS11G01039-RA,AS02G00885-RA,AS04G01115-RA,AS03G00…	0.0439812014482932
150	BP	GO:0003333	amino acid transmembrane transport	AS08G00850-RA,AS03G00499-RA,AS10G00735-RA,AS05G01248-RA,AS08G00556-RA,AS06G02156-RA,AS05G03476-RA,AS07G00855-RA,AS05G01082-RA,AS02G03707-RA,AS09G01080-RA,AS08G00162-RA,AS02G00798-RA,AS08G02207-RA,AS06G00994-RA,AS09G00475-RA,AS06G01002-RA,AS06G02998-RA,AS05G01326-RA,AS05G03527-RA,AS03G01423-RA,AS04G01848-RA,AS03G00501-RA,AS09G00443-RA	0.0439812014482932
151	BP	GO:0006865	amino acid transport	AS08G00850-RA,AS03G00499-RA,AS10G00735-RA,AS05G01248-RA,AS08G00556-RA,AS06G02156-RA,AS05G03476-RA,AS07G00855-RA,AS05G01082-RA,AS02G03707-RA,AS09G01080-RA,AS08G00162-RA,AS02G00798-RA,AS08G02207-RA,AS06G00994-RA,AS09G00475-RA,AS06G01002-RA,AS06G02998-RA,AS05G01326-RA,AS05G03527-RA,AS03G01423-RA,AS04G01848-RA,AS03G00501-RA,AS09G00443-RA	0.0439812014482932
152	MF	GO:0015171	amino acid transmembrane transporter activity	AS08G00850-RA,AS03G00499-RA,AS10G00735-RA,AS05G01248-RA,AS08G00556-RA,AS06G02156-RA,AS05G03476-RA,AS07G00855-RA,AS05G01082-RA,AS02G03707-RA,AS09G01080-RA,AS08G00162-RA,AS02G00798-RA,AS08G02207-RA,AS06G00994-RA,AS09G00475-RA,AS06G01002-RA,AS06G02998-RA,AS05G01326-RA,AS05G03527-RA,AS03G01423-RA,AS04G01848-RA,AS03G00501-RA,AS09G00443-RA	0.0439812014482932
153	MF	GO:0022836	gated channel activity	AS07G00004-RA,AS06G03056-RA,AS08G01281-RA,AS11G01032-RA,AS01G01339-RA,AS03G00591-RA,AS06G02141-RA,AS01G00687-RA,AS02G00531-RA,AS06G00383-RA,AS04G01129-RA,AS01G03715-RA,AS10G01509-RA,AS06G02977-RA,AS10G00204-RA,AS04G03519-RA,AS09G01556-RA,AS10G02706-RA,AS10G00203-RA,AS08G02610-RA,AS01G02112-RA,AS09G00405-RA,AS01G00575-RA,AS09G00406-RA	0.0439812014482932
154	BP	GO:0140013	meiotic nuclear division	AS03G00311-RA,AS09G00446-RA,AS02G00201-RA,AS11G02060-RA,AS06G01668-RA,AS02G03072-RA,AS08G02946-RA,AS02G01485-RA,AS05G02481-RA,AS07G00333-RA,AS04G02005-RA,AS03G02629-RA,AS05G00729-RA,AS11G02192-RA,AS06G03409-RA,AS07G02472-RA,AS06G03008-RA,AS09G00600-RA,AS11G00424-RA,AS04G02565-RA,AS06G02179-RA,AS08G01873-RA,AS10G01586-RA,AS01G01975-RA,AS09G00894-RA,AS01G01202-RA,AS07G02432-RA,AS06G02632-RA,AS01G02…	0.0439812014482932
155	BP	GO:0007059	chromosome segregation	AS04G02502-RA,AS06G00614-RA,AS06G01668-RA,AS01G00050-RA,AS02G03072-RA,AS08G02946-RA,AS10G01395-RA,AS02G01485-RA,AS04G02005-RA,AS03G02629-RA,AS02G02110-RA,AS06G03409-RA,AS07G02472-RA,AS06G03008-RA,AS05G02678-RA,AS01G03125-RA,AS09G00600-RA,AS08G00297-RA,AS11G00424-RA,AS07G02994-RA,AS10G01952-RA,AS07G02616-RA,AS04G02565-RA,AS11G00844-RA,AS01G00063-RA,AS06G02179-RA,AS10G01586-RA,AS06G00349-RA,AS09G00…	0.0442038397204316
156	BP	GO:0003002	regionalization	AS08G01912-RA,AS09G00627-RA,AS04G02686-RA,AS03G01775-RA,AS10G00178-RA,AS04G00804-RA,AS05G02230-RA,AS11G00382-RA,AS09G02047-RA,AS03G00004-RA,AS04G03255-RA,AS06G03472-RA,AS05G00555-RA,AS04G02770-RA,AS02G01228-RA,AS05G00775-RA,AS02G01491-RA,AS04G02436-RA,AS01G03797-RA,AS02G03055-RA,AS11G01077-RA,AS09G00630-RA,AS03G01842-RA,AS09G02928-RA,AS07G00170-RA,AS04G02598-RA,AS04G02565-RA,AS04G03322-RA,AS02G00…	0.0444963962608053
157	BP	GO:0010928	regulation of auxin mediated signaling pathway	AS01G02059-RA,AS09G01808-RA,AS01G03108-RA,AS06G01355-RA,AS05G02230-RA,AS02G03285-RA,AS06G02964-RA,AS03G00266-RA,AS05G00901-RA,AS05G02093-RA,AS06G01118-RA,AS03G01743-RA,AS06G01670-RA,AS03G02849-RA,AS02G01400-RA,AS07G00611-RA,AS05G02756-RA,AS03G00382-RA,AS07G01277-RA,AS08G01227-RA,AS08G01990-RA,AS06G02731-RA,AS10G00795-RA	0.0446339039517595
158	BP	GO:0120255	olefinic compound biosynthetic process	AS02G01929-RA,AS01G00075-RA,AS04G00249-RA,AS04G00469-RA,AS06G02176-RA,AS03G00761-RA,AS11G00189-RA,AS04G00474-RA,AS05G02041-RA,AS05G00316-RA,AS05G01648-RA,AS08G02838-RA,AS08G02992-RA,AS01G00678-RA,AS01G03785-RA,AS05G02127-RA,AS01G02920-RA,AS06G01796-RA,AS02G00275-RA,AS09G01378-RA,AS08G00046-RA,AS03G00205-RA,AS08G03051-RA	0.0446339039517595
159	BP	GO:0000819	sister chromatid segregation	AS04G02502-RA,AS06G00614-RA,AS02G03072-RA,AS08G02946-RA,AS10G01395-RA,AS02G01485-RA,AS04G02005-RA,AS03G02629-RA,AS02G02110-RA,AS06G03409-RA,AS06G03008-RA,AS05G02678-RA,AS01G03125-RA,AS08G00297-RA,AS07G02994-RA,AS10G01952-RA,AS07G02616-RA,AS04G02565-RA,AS11G00844-RA,AS01G00063-RA,AS06G00349-RA,AS10G01808-RA	0.0458981081871266
160	BP	GO:0010453	regulation of cell fate commitment	AS02G00053-RA,AS07G02418-RA,AS09G02203-RA,AS07G02394-RA,AS04G00330-RA,AS10G00637-RA,AS01G01899-RA,AS03G00880-RA,AS06G02563-RA,AS02G01214-RA	0.0472067111088302
161	BP	GO:0042537	benzene-containing compound metabolic process	AS04G00249-RA,AS10G02600-RA,AS06G02176-RA,AS06G03589-RA,AS05G01648-RA,AS08G02566-RA,AS10G00112-RA,AS06G01372-RA,AS08G01635-RA,AS11G01656-RA,AS09G00011-RA,AS08G02567-RA,AS10G02265-RA,AS01G03184-RA,AS06G00752-RA,AS01G03033-RA	0.0472067111088302
162	BP	GO:0050801	ion homeostasis	AS01G03419-RA,AS07G01198-RA,AS06G02354-RA,AS06G03011-RA,AS11G01276-RA,AS01G03086-RA,AS08G02195-RA,AS06G03056-RA,AS04G00804-RA,AS08G03804-RA,AS08G01809-RA,AS06G00546-RA,AS07G00701-RA,AS10G00030-RA,AS03G00499-RA,AS10G02485-RA,AS08G00562-RA,AS02G01503-RA,AS11G02388-RA,AS05G03476-RA,AS08G01021-RA,AS08G00226-RA,AS05G03279-RA,AS05G00082-RA,AS06G00996-RA,AS02G01181-RA,AS04G00501-RA,AS03G00181-RA,AS07G00…	0.0472067111088302
163	BP	GO:1902074	response to salt	AS02G00255-RA,AS08G01893-RA,AS04G01097-RA,AS02G00266-RA,AS09G00201-RA,AS01G01231-RA,AS05G01433-RA,AS02G00644-RA,AS05G02133-RA,AS03G02436-RA,AS09G00323-RA,AS09G01378-RA	0.0472067111088302
164	BP	GO:0015706	nitrate transport	AS01G01324-RA,AS04G02686-RA,AS09G03034-RA,AS09G03061-RA,AS08G00395-RA,AS02G01503-RA,AS06G02642-RA,AS06G02643-RA,AS01G01231-RA,AS03G00943-RA,AS08G01700-RA,AS11G02057-RA,AS08G00891-RA,AS02G00644-RA,AS09G01556-RA,AS10G01056-RA,AS07G01176-RA,AS08G02940-RA	0.0477465504350343

## Sheet: DEGs-A7vsA5 （KRGG）
No.	ID	Description	GeneRatio	BgRatio	pvalue	p.adjust	q value	geneID	Count	Ratio
1	ko00940	Phenylpropanoid biosynthesis	98/2297	227/14627	2.84816299367699e-23	1.07945377460358e-20	7.5851077621082e-21	AS05G00210-RA/AS06G03499-RA/AS01G03183-RA/AS06G00355-RA/AS11G02050-RA/AS09G00884-RA/AS01G02667-RA/AS06G03538-RA/AS07G03036-RA/AS10G01519-RA/AS01G02035-RA/AS07G00512-RA/AS08G03009-RA/AS01G00430-RA/AS05G02139-RA/AS04G02137-RA/AS01G02037-RA/AS05G01340-RA/AS10G01252-RA/AS06G01910-RA/AS05G03724-RA/AS01G02507-RA/AS07G02833-RA/AS02G01428-RA/AS06G02433-RA/AS07G00902-RA/AS08G03457-RA/AS03G00299-RA/AS06G00…	98	0.042664344797562
2	ko05133	Pertussis	93/2297	298/14627	1.07990175309614e-11	2.04641382211719e-09	1.43797443964907e-09	AS04G02788-RA/AS03G02955-RA/AS04G03186-RA/AS01G01222-RA/AS05G01265-RA/AS08G02881-RA/AS09G00747-RA/AS04G02923-RA/AS04G03110-RA/AS07G01803-RA/AS02G00804-RA/AS08G03718-RA/AS09G01150-RA/AS07G00337-RA/AS10G00991-RA/AS03G02684-RA/AS05G01301-RA/AS10G02816-RA/AS05G01690-RA/AS04G01628-RA/AS05G01780-RA/AS04G01148-RA/AS01G03569-RA/AS10G00018-RA/AS01G02260-RA/AS05G00628-RA/AS10G00701-RA/AS08G03295-RA/AS03G00…	93	0.0404875925119721
3	ko04620	Toll-like receptor signaling pathway	89/2297	284/14627	2.34552426766851e-11	2.94140942943135e-09	2.06687011705633e-09	AS07G00735-RA/AS04G02788-RA/AS03G02955-RA/AS04G03186-RA/AS01G01222-RA/AS05G01265-RA/AS08G03455-RA/AS08G02881-RA/AS03G01023-RA/AS09G00747-RA/AS04G02923-RA/AS04G03110-RA/AS07G01803-RA/AS02G00804-RA/AS08G03718-RA/AS05G00394-RA/AS07G00337-RA/AS10G00991-RA/AS03G02684-RA/AS05G01301-RA/AS10G02816-RA/AS05G01690-RA/AS04G01628-RA/AS05G01780-RA/AS11G02192-RA/AS01G03569-RA/AS10G00018-RA/AS01G02260-RA/AS05G00…	89	0.0387461906835002
4	ko05145	Toxoplasmosis	103/2297	349/14627	3.48529133029477e-11	2.94140942943135e-09	2.06687011705633e-09	AS04G02788-RA/AS03G02955-RA/AS04G03186-RA/AS01G01222-RA/AS05G01265-RA/AS08G02881-RA/AS07G03345-RA/AS09G00747-RA/AS03G00476-RA/AS06G02396-RA/AS04G02923-RA/AS04G03110-RA/AS07G01803-RA/AS02G00804-RA/AS08G03718-RA/AS05G01911-RA/AS07G00337-RA/AS10G00991-RA/AS03G02684-RA/AS05G01301-RA/AS10G02816-RA/AS05G01690-RA/AS04G01628-RA/AS05G01780-RA/AS11G00325-RA/AS02G01961-RA/AS04G02487-RA/AS01G03569-RA/AS10G00…	103	0.0448410970831519
5	ko05417	Lipid and atherosclerosis	127/2297	462/14627	3.88048737391999e-11	2.94140942943135e-09	2.06687011705633e-09	AS07G00735-RA/AS04G02788-RA/AS03G02955-RA/AS04G03186-RA/AS01G01222-RA/AS05G01265-RA/AS07G01952-RA/AS08G02881-RA/AS03G01023-RA/AS09G00747-RA/AS05G01711-RA/AS03G00476-RA/AS04G02923-RA/AS03G02658-RA/AS04G03110-RA/AS07G01803-RA/AS02G00804-RA/AS08G03718-RA/AS05G01911-RA/AS05G03112-RA/AS05G00394-RA/AS07G00337-RA/AS10G00991-RA/AS03G02684-RA/AS05G01301-RA/AS10G02816-RA/AS05G01690-RA/AS04G01628-RA/AS05G01…	127	0.0552895080539835
6	ko05161	Hepatitis B	93/2297	308/14627	8.14752770766671e-11	5.14652166867614e-09	3.61635878954329e-09	AS04G02788-RA/AS09G00446-RA/AS03G02955-RA/AS04G03186-RA/AS01G01222-RA/AS05G01265-RA/AS08G02881-RA/AS09G00747-RA/AS07G03537-RA/AS04G02923-RA/AS04G03110-RA/AS07G01803-RA/AS02G00804-RA/AS08G03718-RA/AS07G00337-RA/AS10G00991-RA/AS03G02684-RA/AS05G01301-RA/AS10G02816-RA/AS05G01690-RA/AS04G01628-RA/AS05G01780-RA/AS11G02192-RA/AS01G03569-RA/AS10G00018-RA/AS01G02260-RA/AS05G00628-RA/AS05G02938-RA/AS10G00…	93	0.0404875925119721
7	ko00196	Photosynthesis - antenna proteins	22/2297	34/14627	1.49565767457154e-10	7.33484708335174e-09	5.15405169306482e-09	AS02G00043-RA/AS09G02198-RA/AS05G03579-RA/AS10G01176-RA/AS09G02196-RA/AS01G03040-RA/AS07G00861-RA/AS10G01920-RA/AS03G00615-RA/AS07G03326-RA/AS06G01935-RA/AS03G00612-RA/AS04G03596-RA/AS07G00860-RA/AS11G00121-RA/AS09G00108-RA/AS08G01540-RA/AS11G00231-RA/AS09G02183-RA/AS09G02188-RA/AS08G01536-RA/AS11G00119-RA	22	0.00957771005659556
8	ko04722	Neurotrophin signaling pathway	101/2297	348/14627	1.54825268250169e-10	7.33484708335174e-09	5.15405169306482e-09	AS07G00735-RA/AS04G02788-RA/AS03G02955-RA/AS04G03186-RA/AS01G01222-RA/AS05G01265-RA/AS08G02881-RA/AS03G01023-RA/AS09G00747-RA/AS04G02923-RA/AS04G03110-RA/AS07G01803-RA/AS02G00804-RA/AS08G03718-RA/AS05G01911-RA/AS05G00394-RA/AS07G00337-RA/AS10G00991-RA/AS03G02684-RA/AS05G01301-RA/AS10G02816-RA/AS05G01690-RA/AS10G01896-RA/AS04G01628-RA/AS05G01780-RA/AS04G01148-RA/AS11G02192-RA/AS01G03569-RA/AS10G00…	101	0.043970396168916
9	ko05140	Leishmaniasis	85/2297	278/14627	2.652929094496e-10	1.1171779186822e-08	7.8501878468712e-09	AS04G02788-RA/AS03G02955-RA/AS04G03186-RA/AS01G01222-RA/AS05G01265-RA/AS08G02881-RA/AS09G00747-RA/AS04G02923-RA/AS04G03110-RA/AS07G01803-RA/AS02G00804-RA/AS08G03718-RA/AS07G00337-RA/AS10G00991-RA/AS03G02684-RA/AS05G01301-RA/AS10G02816-RA/AS05G01690-RA/AS04G01628-RA/AS05G01780-RA/AS08G04016-RA/AS01G03569-RA/AS10G00018-RA/AS01G02260-RA/AS05G00628-RA/AS10G00701-RA/AS03G00925-RA/AS11G01680-RA/AS03G00…	85	0.0370047888550283
10	ko04010	MAPK signaling pathway	107/2297	387/14627	9.66264218633166e-10	3.6621413886197e-08	2.57331418225464e-08	AS07G00735-RA/AS04G02788-RA/AS03G02955-RA/AS04G03186-RA/AS01G01222-RA/AS05G01265-RA/AS07G01952-RA/AS08G02881-RA/AS03G01023-RA/AS09G00747-RA/AS05G01711-RA/AS03G00476-RA/AS04G02923-RA/AS04G03110-RA/AS07G01803-RA/AS02G00804-RA/AS08G03718-RA/AS05G00394-RA/AS07G00337-RA/AS10G00991-RA/AS03G02684-RA/AS05G01301-RA/AS10G02816-RA/AS05G01690-RA/AS04G01628-RA/AS05G01780-RA/AS06G01179-RA/AS04G02487-RA/AS11G02…	107	0.0465824989116239
11	ko04075	Plant hormone signal transduction	111/2297	407/14627	1.11376298168531e-09	3.83741972780665e-08	2.69647879776443e-08	AS11G01447-RA/AS03G01097-RA/AS04G03593-RA/AS09G01629-RA/AS11G02359-RA/AS04G00746-RA/AS09G01157-RA/AS06G02652-RA/AS04G02400-RA/AS02G00079-RA/AS08G01811-RA/AS10G01128-RA/AS04G02560-RA/AS10G00144-RA/AS09G00635-RA/AS04G02770-RA/AS04G00246-RA/AS11G01180-RA/AS09G03010-RA/AS08G02223-RA/AS02G01522-RA/AS08G00019-RA/AS02G02953-RA/AS03G02650-RA/AS03G02018-RA/AS03G00911-RA/AS05G00697-RA/AS03G02739-RA/AS04G03…	111	0.0483239007400958
12	ko05142	Chagas disease	85/2297	286/14627	1.25320328069228e-09	3.95803369485313e-08	2.78123184223814e-08	AS04G02788-RA/AS03G02955-RA/AS04G03186-RA/AS01G01222-RA/AS05G01265-RA/AS08G02881-RA/AS09G00747-RA/AS04G02923-RA/AS04G03110-RA/AS07G01803-RA/AS02G00804-RA/AS08G03718-RA/AS07G00337-RA/AS10G00991-RA/AS03G02684-RA/AS05G01301-RA/AS10G02816-RA/AS05G01690-RA/AS04G01628-RA/AS05G01780-RA/AS01G03569-RA/AS10G00018-RA/AS01G02260-RA/AS05G00628-RA/AS10G00701-RA/AS03G00925-RA/AS11G01680-RA/AS03G00211-RA/AS04G01…	85	0.0370047888550283
13	ko00199	Cytochrome P450 [BR:ko00199]	93/2297	330/14627	4.30382269673949e-09	1.18358395412672e-07	8.31680989846022e-08	AS04G02302-RA/AS02G02948-RA/AS04G02523-RA/AS04G00608-RA/AS05G01898-RA/AS01G01069-RA/AS03G02658-RA/AS02G00410-RA/AS06G02080-RA/AS09G00047-RA/AS08G00075-RA/AS09G03090-RA/AS05G00665-RA/AS02G02804-RA/AS04G03360-RA/AS08G03005-RA/AS11G02420-RA/AS08G00542-RA/AS05G00251-RA/AS02G03828-RA/AS08G00250-RA/AS01G01973-RA/AS11G00024-RA/AS02G01008-RA/AS07G01482-RA/AS08G03466-RA/AS04G00953-RA/AS02G00871-RA/AS03G00…	93	0.0404875925119721
14	ko05132	Salmonella infection	121/2297	465/14627	4.37207793081111e-09	1.18358395412672e-07	8.31680989846022e-08	AS07G00735-RA/AS04G02788-RA/AS03G02955-RA/AS04G03186-RA/AS01G02601-RA/AS08G00393-RA/AS01G01222-RA/AS06G00066-RA/AS05G01265-RA/AS08G02881-RA/AS03G01023-RA/AS09G00747-RA/AS05G03339-RA/AS04G02923-RA/AS04G03110-RA/AS07G01803-RA/AS02G00804-RA/AS08G03718-RA/AS09G01827-RA/AS05G03112-RA/AS05G00394-RA/AS07G00337-RA/AS10G00991-RA/AS03G02684-RA/AS05G03275-RA/AS05G01301-RA/AS10G02816-RA/AS05G01690-RA/AS01G00…	121	0.0526774053112756
15	ko05135	Yersinia infection	88/2297	314/14627	1.49468711139446e-08	3.77657610145667e-07	2.65372518724771e-07	AS07G00735-RA/AS04G02788-RA/AS03G02955-RA/AS04G03186-RA/AS01G01222-RA/AS05G01265-RA/AS08G02881-RA/AS03G01023-RA/AS09G00747-RA/AS04G02923-RA/AS04G03110-RA/AS07G01803-RA/AS02G00804-RA/AS08G03718-RA/AS05G00394-RA/AS07G00337-RA/AS10G00991-RA/AS03G02684-RA/AS05G01301-RA/AS10G02816-RA/AS05G01690-RA/AS04G01628-RA/AS05G01780-RA/AS11G02192-RA/AS01G03569-RA/AS10G00018-RA/AS01G02260-RA/AS05G00628-RA/AS10G00…	88	0.0383108402263822
16	ko05130	Pathogenic Escherichia coli infection	106/2297	401/14627	1.65035669433453e-08	3.90928241970493e-07	2.74697528728051e-07	AS07G00735-RA/AS08G02942-RA/AS04G02788-RA/AS03G02955-RA/AS04G03186-RA/AS01G01222-RA/AS05G01265-RA/AS08G02881-RA/AS03G01023-RA/AS09G00747-RA/AS04G02923-RA/AS04G03110-RA/AS07G01803-RA/AS02G00804-RA/AS03G02551-RA/AS08G03718-RA/AS04G02432-RA/AS05G00394-RA/AS07G00337-RA/AS10G00991-RA/AS03G02684-RA/AS05G01301-RA/AS10G02816-RA/AS05G01690-RA/AS04G01628-RA/AS05G01780-RA/AS04G03104-RA/AS07G02612-RA/AS01G03…	106	0.0461471484545059
17	ko04064	NF-kappa B signaling pathway	79/2297	274/14627	2.12134633009112e-08	4.72935446532079e-07	3.32322366261953e-07	AS04G02788-RA/AS03G02955-RA/AS04G03186-RA/AS05G01265-RA/AS09G00747-RA/AS04G02923-RA/AS04G03110-RA/AS07G01803-RA/AS02G00804-RA/AS08G03718-RA/AS07G00337-RA/AS10G00991-RA/AS03G02684-RA/AS05G01301-RA/AS10G02816-RA/AS05G01690-RA/AS04G01628-RA/AS05G01780-RA/AS01G03569-RA/AS10G00018-RA/AS01G02260-RA/AS05G00628-RA/AS10G00701-RA/AS03G00925-RA/AS11G01680-RA/AS03G00211-RA/AS04G01222-RA/AS05G00287-RA/AS07G00…	79	0.0343926861123204
18	ko04624	Toll and Imd signaling pathway	81/2297	286/14627	3.36561205338363e-08	7.08648315684664e-07	4.97953128366116e-07	AS04G02788-RA/AS03G02955-RA/AS04G03186-RA/AS05G01265-RA/AS09G00747-RA/AS04G02923-RA/AS04G03110-RA/AS07G01803-RA/AS02G00804-RA/AS08G03718-RA/AS07G00337-RA/AS10G00991-RA/AS03G02684-RA/AS05G01301-RA/AS10G02816-RA/AS05G01690-RA/AS04G01628-RA/AS05G01780-RA/AS01G03569-RA/AS10G00018-RA/AS01G02260-RA/AS05G02725-RA/AS05G00628-RA/AS10G00701-RA/AS03G00925-RA/AS11G01680-RA/AS03G00211-RA/AS04G01222-RA/AS05G00…	81	0.0352633870265564
19	ko04936	Alcoholic liver disease	95/2297	356/14627	5.60428844817265e-08	1.11790806413549e-06	7.85531843428078e-07	AS04G02788-RA/AS03G02955-RA/AS04G03186-RA/AS05G01265-RA/AS09G00747-RA/AS11G00382-RA/AS11G01546-RA/AS05G03378-RA/AS08G01809-RA/AS04G02923-RA/AS04G03110-RA/AS07G01803-RA/AS02G00804-RA/AS05G00044-RA/AS08G03718-RA/AS04G02369-RA/AS07G00337-RA/AS10G00991-RA/AS03G02684-RA/AS05G01301-RA/AS10G02816-RA/AS05G01690-RA/AS05G01320-RA/AS04G01628-RA/AS05G01780-RA/AS01G03569-RA/AS04G02351-RA/AS10G00018-RA/AS01G02…	95	0.0413582934262081
20	ko05170	Human immunodeficiency virus 1 infection	105/2297	406/14627	6.52247645448209e-08	1.23600928812436e-06	8.68519233149457e-07	AS07G00735-RA/AS04G02788-RA/AS03G02955-RA/AS04G03186-RA/AS01G01222-RA/AS05G01265-RA/AS07G01952-RA/AS08G02881-RA/AS03G01023-RA/AS09G00747-RA/AS05G01711-RA/AS04G02923-RA/AS04G03110-RA/AS07G01803-RA/AS02G00804-RA/AS08G03718-RA/AS09G01150-RA/AS05G00394-RA/AS07G00337-RA/AS10G00991-RA/AS03G02684-RA/AS05G01301-RA/AS10G02816-RA/AS05G01690-RA/AS04G01628-RA/AS05G01780-RA/AS04G01148-RA/AS11G02192-RA/AS06G00…	105	0.0457117979973879
21	ko05162	Measles	90/2297	342/14627	2.46518820393801e-07	4.44907775853574e-06	3.12627877491888e-06	AS04G02788-RA/AS03G02955-RA/AS04G03186-RA/AS05G01265-RA/AS09G00747-RA/AS03G00476-RA/AS04G02923-RA/AS04G03110-RA/AS07G01803-RA/AS02G00804-RA/AS08G03718-RA/AS07G00337-RA/AS10G00991-RA/AS03G02684-RA/AS05G01301-RA/AS10G02816-RA/AS05G01690-RA/AS04G01628-RA/AS05G01780-RA/AS04G02487-RA/AS01G03569-RA/AS10G00018-RA/AS01G02260-RA/AS05G00628-RA/AS02G00885-RA/AS10G00701-RA/AS03G00925-RA/AS11G01680-RA/AS03G00…	90	0.0391815411406182
22	ko04814	Motor proteins	48/2297	148/14627	2.93199254030257e-07	5.05102351261216e-06	3.54925412773469e-06	AS07G01716-RA/AS08G04018-RA/AS03G00311-RA/AS03G01883-RA/AS05G00624-RA/AS04G01543-RA/AS03G00064-RA/AS09G00728-RA/AS01G00532-RA/AS01G00133-RA/AS04G02502-RA/AS04G02101-RA/AS06G00614-RA/AS03G02551-RA/AS04G02432-RA/AS02G02423-RA/AS01G00050-RA/AS05G00158-RA/AS08G02860-RA/AS07G00333-RA/AS08G03044-RA/AS04G03104-RA/AS07G02612-RA/AS05G00566-RA/AS04G00416-RA/AS02G03159-RA/AS05G03765-RA/AS11G01161-RA/AS07G02…	48	0.020896821941663
23	ko05152	Tuberculosis	106/2297	426/14627	4.47115952993128e-07	7.36769331236502e-06	5.17713208728885e-06	AS07G00405-RA/AS04G02788-RA/AS03G02955-RA/AS04G03186-RA/AS01G01222-RA/AS05G01265-RA/AS07G01952-RA/AS08G02881-RA/AS09G00747-RA/AS05G01711-RA/AS04G02923-RA/AS04G03110-RA/AS07G01803-RA/AS02G00804-RA/AS09G03117-RA/AS08G03013-RA/AS08G03718-RA/AS07G00337-RA/AS10G00991-RA/AS03G02684-RA/AS05G01301-RA/AS06G01739-RA/AS10G02816-RA/AS05G01690-RA/AS04G01628-RA/AS05G01780-RA/AS04G01148-RA/AS02G03704-RA/AS01G03…	106	0.0461471484545059
24	ko05169	Epstein-Barr virus infection	95/2297	372/14627	5.10806507110238e-07	8.06648609144917e-06	5.66815992538992e-06	AS07G00735-RA/AS04G02788-RA/AS09G00446-RA/AS03G02955-RA/AS04G03186-RA/AS05G01265-RA/AS03G01023-RA/AS09G00747-RA/AS07G03537-RA/AS04G02923-RA/AS04G03110-RA/AS07G01803-RA/AS02G00804-RA/AS08G03718-RA/AS05G00394-RA/AS07G00337-RA/AS10G00991-RA/AS03G02684-RA/AS05G01301-RA/AS10G02816-RA/AS05G01690-RA/AS04G01628-RA/AS05G01780-RA/AS06G03727-RA/AS01G03569-RA/AS10G00018-RA/AS01G02260-RA/AS05G00628-RA/AS05G02…	95	0.0413582934262081
25	ko05168	Herpes simplex virus 1 infection	82/2297	312/14627	8.83902451144471e-07	1.33999611593502e-05	9.41588716377058e-06	AS04G02788-RA/AS03G02955-RA/AS04G03186-RA/AS05G01265-RA/AS09G00747-RA/AS04G02923-RA/AS04G03110-RA/AS07G01803-RA/AS02G00804-RA/AS10G00113-RA/AS08G03718-RA/AS07G00337-RA/AS10G00991-RA/AS03G02684-RA/AS05G01301-RA/AS10G02816-RA/AS05G01690-RA/AS04G01628-RA/AS05G01780-RA/AS01G03569-RA/AS10G00018-RA/AS01G02260-RA/AS05G00628-RA/AS10G00701-RA/AS03G00925-RA/AS11G01680-RA/AS03G00211-RA/AS03G01920-RA/AS04G01…	82	0.0356987374836744
26	ko04621	NOD-like receptor signaling pathway	84/2297	332/14627	3.42778554469655e-06	4.99665662092305e-05	3.51105159031671e-05	AS04G02788-RA/AS03G02955-RA/AS04G03186-RA/AS08G00393-RA/AS01G01222-RA/AS06G00066-RA/AS05G01265-RA/AS07G00004-RA/AS08G02881-RA/AS09G00747-RA/AS04G03110-RA/AS07G01803-RA/AS08G03718-RA/AS07G00337-RA/AS10G00991-RA/AS03G02684-RA/AS05G03275-RA/AS05G01301-RA/AS10G02816-RA/AS05G01690-RA/AS01G00899-RA/AS10G01896-RA/AS04G01628-RA/AS05G01780-RA/AS01G03569-RA/AS10G00018-RA/AS07G03237-RA/AS05G00628-RA/AS10G00…	84	0.0365694383979103
27	ko00073	Cutin, suberine and wax biosynthesis	21/2297	48/14627	3.56392851884719e-06	5.00269966164106e-05	3.51529791527618e-05	AS01G01069-RA/AS02G00410-RA/AS04G00249-RA/AS08G00075-RA/AS02G02804-RA/AS08G03005-RA/AS11G02420-RA/AS06G02176-RA/AS02G03809-RA/AS10G01250-RA/AS04G00173-RA/AS10G02471-RA/AS06G02692-RA/AS08G03761-RA/AS06G02693-RA/AS10G00023-RA/AS07G01002-RA/AS10G02518-RA/AS03G01863-RA/AS01G02910-RA/AS01G01930-RA	21	0.00914235959947758
28	ko05164	Influenza A	76/2297	293/14627	3.7305454366937e-06	5.04955971609612e-05	3.54822554693048e-05	AS04G02788-RA/AS03G02955-RA/AS04G03186-RA/AS01G01222-RA/AS05G01265-RA/AS08G02881-RA/AS06G03252-RA/AS09G00747-RA/AS04G03110-RA/AS07G01803-RA/AS08G03718-RA/AS07G00337-RA/AS10G00991-RA/AS03G02684-RA/AS10G02392-RA/AS05G01301-RA/AS10G02816-RA/AS05G01690-RA/AS04G01628-RA/AS05G01780-RA/AS11G02192-RA/AS01G03569-RA/AS10G00018-RA/AS05G00628-RA/AS10G00701-RA/AS03G00925-RA/AS11G01680-RA/AS03G00211-RA/AS04G01…	76	0.0330866347409665
29	ko04914	Progesterone-mediated oocyte maturation	21/2297	51/14627	1.13392037156767e-05	0.000148191662353154	0.000104131344467013	AS09G00446-RA/AS01G01222-RA/AS08G02881-RA/AS11G01827-RA/AS07G03537-RA/AS04G02502-RA/AS06G00614-RA/AS02G03072-RA/AS11G02192-RA/AS06G03409-RA/AS08G00297-RA/AS11G01292-RA/AS08G03425-RA/AS08G01873-RA/AS08G01730-RA/AS05G00001-RA/AS01G01202-RA/AS07G02432-RA/AS08G03142-RA/AS04G03533-RA/AS01G03272-RA	21	0.00914235959947758
30	ko04014	Ras signaling pathway	35/2297	110/14627	1.81930347206895e-05	0.000229838671971377	0.000161503080152085	AS07G00735-RA/AS02G00243-RA/AS10G00251-RA/AS01G01222-RA/AS05G03414-RA/AS02G00206-RA/AS08G02881-RA/AS03G01023-RA/AS10G00180-RA/AS05G00394-RA/AS11G01038-RA/AS11G01051-RA/AS10G00380-RA/AS04G01148-RA/AS11G02192-RA/AS02G00211-RA/AS04G00443-RA/AS09G02831-RA/AS02G00203-RA/AS07G02418-RA/AS08G01873-RA/AS04G03724-RA/AS10G00413-RA/AS07G02394-RA/AS04G00481-RA/AS07G02357-RA/AS02G00237-RA/AS07G00952-RA/AS07G02…	35	0.0152372659991293
31	ko04016	MAPK signaling pathway - plant	60/2297	227/14627	2.06957347083396e-05	0.000253022046918087	0.000177793578309335	AS09G00408-RA/AS07G01936-RA/AS04G02400-RA/AS08G01811-RA/AS04G02560-RA/AS09G00635-RA/AS05G02019-RA/AS02G01522-RA/AS08G00019-RA/AS05G00256-RA/AS09G02189-RA/AS01G03267-RA/AS05G02110-RA/AS05G01690-RA/AS04G01928-RA/AS10G01718-RA/AS04G01148-RA/AS09G02928-RA/AS02G02300-RA/AS11G01504-RA/AS02G00184-RA/AS10G00126-RA/AS03G00413-RA/AS03G00925-RA/AS01G01793-RA/AS08G00830-RA/AS11G02001-RA/AS04G01931-RA/AS11G02…	60	0.0261210274270788
32	ko04626	Plant-pathogen interaction	70/2297	278/14627	2.58107273825483e-05	0.00030016831704309	0.000210922328043054	AS05G00750-RA/AS03G02023-RA/AS08G02876-RA/AS07G03345-RA/AS01G02104-RA/AS02G00150-RA/AS06G02396-RA/AS04G00993-RA/AS09G02189-RA/AS10G01508-RA/AS10G01518-RA/AS05G03112-RA/AS01G03267-RA/AS05G01690-RA/AS04G02942-RA/AS11G01032-RA/AS11G00325-RA/AS02G01961-RA/AS04G01148-RA/AS11G02192-RA/AS01G01339-RA/AS11G01039-RA/AS02G00581-RA/AS03G00925-RA/AS04G00667-RA/AS06G00936-RA/AS10G00152-RA/AS08G00830-RA/AS04G02…	70	0.0304745319982586
33	ko04915	Estrogen signaling pathway	30/2297	90/14627	2.6136027605335e-05	0.00030016831704309	0.000210922328043054	AS01G01222-RA/AS08G02881-RA/AS03G00476-RA/AS09G03117-RA/AS08G03013-RA/AS05G03112-RA/AS04G02487-RA/AS04G01148-RA/AS11G02192-RA/AS02G00885-RA/AS08G03425-RA/AS03G02779-RA/AS08G01873-RA/AS10G00413-RA/AS05G00001-RA/AS04G00481-RA/AS08G02821-RA/AS06G01411-RA/AS07G00952-RA/AS07G02432-RA/AS02G03684-RA/AS10G01150-RA/AS01G00427-RA/AS04G03533-RA/AS10G00644-RA/AS01G00426-RA/AS02G00882-RA/AS04G01789-RA/AS01G03…	30	0.0130605137135394
34	ko04917	Prolactin signaling pathway	32/2297	99/14627	2.87872456583716e-05	0.00032089312072126	0.00022548523689065	AS01G01222-RA/AS08G02881-RA/AS03G02658-RA/AS11G02192-RA/AS02G01008-RA/AS07G01482-RA/AS03G00837-RA/AS09G00870-RA/AS01G03016-RA/AS03G02657-RA/AS11G02111-RA/AS08G01873-RA/AS08G03515-RA/AS01G03081-RA/AS05G00196-RA/AS09G00208-RA/AS10G00037-RA/AS06G02522-RA/AS01G01535-RA/AS07G01561-RA/AS07G00194-RA/AS06G00884-RA/AS07G02432-RA/AS01G03077-RA/AS11G00946-RA/AS01G03046-RA/AS05G00578-RA/AS07G03012-RA/AS08G00…	32	0.0139312146277754
35	ko00564	Glycerophospholipid metabolism	39/2297	132/14627	4.1805455340061e-05	0.000440118543718975	0.000309262578977644	AS07G01392-RA/AS05G03414-RA/AS08G00240-RA/AS07G02727-RA/AS05G02221-RA/AS06G03455-RA/AS04G02977-RA/AS06G00934-RA/AS05G00044-RA/AS09G00302-RA/AS06G02833-RA/AS05G02677-RA/AS01G00268-RA/AS05G02069-RA/AS04G01908-RA/AS07G00850-RA/AS08G00961-RA/AS10G00380-RA/AS08G00555-RA/AS11G01568-RA/AS01G01395-RA/AS04G00094-RA/AS11G01840-RA/AS11G02539-RA/AS06G02838-RA/AS04G03005-RA/AS04G03253-RA/AS01G03496-RA/AS04G02…	39	0.0169786678276012
36	ko04934	Cushing syndrome	39/2297	132/14627	4.1805455340061e-05	0.000440118543718975	0.000309262578977644	AS01G01222-RA/AS08G02881-RA/AS03G02658-RA/AS11G02192-RA/AS05G02938-RA/AS02G01008-RA/AS08G00381-RA/AS07G01482-RA/AS03G00837-RA/AS09G00870-RA/AS02G00852-RA/AS11G01292-RA/AS01G03016-RA/AS08G03425-RA/AS03G02657-RA/AS11G02111-RA/AS08G01873-RA/AS08G03515-RA/AS01G03081-RA/AS05G00196-RA/AS09G00208-RA/AS10G00037-RA/AS02G01816-RA/AS06G02522-RA/AS01G01535-RA/AS07G01561-RA/AS07G00194-RA/AS05G00001-RA/AS06G00…	39	0.0169786678276012
37	ko04927	Cortisol synthesis and secretion	27/2297	81/14627	6.5043311939494e-05	0.000666254465542385	0.000468163809977013	AS03G02658-RA/AS02G01008-RA/AS07G01482-RA/AS03G00837-RA/AS09G00870-RA/AS01G03016-RA/AS03G02657-RA/AS11G02111-RA/AS08G03515-RA/AS01G03081-RA/AS05G00196-RA/AS09G00208-RA/AS10G00037-RA/AS06G02522-RA/AS01G01535-RA/AS07G01561-RA/AS07G00194-RA/AS06G00884-RA/AS01G03077-RA/AS11G00946-RA/AS01G03046-RA/AS05G00578-RA/AS07G03012-RA/AS08G00713-RA/AS05G00577-RA/AS02G02932-RA/AS01G02713-RA	27	0.0117544623421855
38	ko04726	Serotonergic synapse	28/2297	86/14627	7.69944242759972e-05	0.000767918073700077	0.000539600812793	AS01G01222-RA/AS08G02881-RA/AS03G02658-RA/AS08G01488-RA/AS05G00665-RA/AS08G01489-RA/AS11G02192-RA/AS01G01973-RA/AS07G01482-RA/AS01G03016-RA/AS05G00423-RA/AS08G03425-RA/AS03G02657-RA/AS04G03672-RA/AS11G02111-RA/AS08G01873-RA/AS05G00623-RA/AS10G00037-RA/AS07G01561-RA/AS05G00001-RA/AS08G01490-RA/AS04G02879-RA/AS02G02034-RA/AS07G02432-RA/AS07G03447-RA/AS05G00577-RA/AS02G02932-RA/AS01G02713-RA	28	0.0121898127993034
39	ko00500	Starch and sucrose metabolism	54/2297	209/14627	0.000100928395706047	0.000980816973656198	0.000689200650840211	AS09G00741-RA/AS06G01146-RA/AS08G00521-RA/AS01G00336-RA/AS07G00639-RA/AS05G02389-RA/AS02G01865-RA/AS10G01628-RA/AS01G03425-RA/AS04G03615-RA/AS03G00319-RA/AS01G02335-RA/AS05G01755-RA/AS08G01558-RA/AS08G01036-RA/AS10G01587-RA/AS06G00860-RA/AS06G02037-RA/AS10G00223-RA/AS08G04016-RA/AS01G00561-RA/AS09G00768-RA/AS03G02681-RA/AS10G01394-RA/AS02G03148-RA/AS11G02145-RA/AS10G00823-RA/AS02G00180-RA/AS08G02…	54	0.0235089246843709
40	ko04270	Vascular smooth muscle contraction	19/2297	51/14627	0.000148129821637887	0.00140353006001898	0.000986232759852246	AS01G01222-RA/AS08G02881-RA/AS10G00113-RA/AS04G02432-RA/AS04G01148-RA/AS11G02192-RA/AS03G01920-RA/AS01G03215-RA/AS08G02044-RA/AS08G01873-RA/AS02G03774-RA/AS10G00413-RA/AS04G00481-RA/AS07G02047-RA/AS07G00952-RA/AS07G02432-RA/AS04G01789-RA/AS06G01443-RA/AS10G00860-RA	19	0.00827165868524162
41	ko05207	Chemical carcinogenesis - receptor activation	32/2297	109/14627	0.000224084075529266	0.00207141133233151	0.00145553969470871	AS01G01222-RA/AS08G02881-RA/AS03G00454-RA/AS07G01174-RA/AS10G00416-RA/AS05G03112-RA/AS04G03468-RA/AS07G01164-RA/AS11G02363-RA/AS11G02192-RA/AS01G01973-RA/AS07G01482-RA/AS04G00953-RA/AS08G03425-RA/AS11G02362-RA/AS11G02111-RA/AS08G01873-RA/AS08G00391-RA/AS09G00786-RA/AS07G00194-RA/AS05G00001-RA/AS06G00884-RA/AS07G01160-RA/AS11G02355-RA/AS07G02432-RA/AS05G01748-RA/AS07G03447-RA/AS04G03533-RA/AS05G00…	32	0.0139312146277754
42	ko00140	Steroid hormone biosynthesis	33/2297	114/14627	0.000240824403546658	0.00217315354629008	0.00152703193226327	AS03G02658-RA/AS01G01973-RA/AS04G01427-RA/AS02G01008-RA/AS07G01482-RA/AS11G00189-RA/AS04G00953-RA/AS03G00837-RA/AS09G00870-RA/AS01G03016-RA/AS03G02657-RA/AS11G02111-RA/AS08G03515-RA/AS01G03081-RA/AS05G00196-RA/AS09G00208-RA/AS10G00037-RA/AS06G02522-RA/AS01G01535-RA/AS07G01561-RA/AS07G00194-RA/AS06G00884-RA/AS01G03077-RA/AS11G00946-RA/AS01G03046-RA/AS02G00275-RA/AS07G03447-RA/AS05G00578-RA/AS07G03…	33	0.0143665650848933
43	ko04913	Ovarian steroidogenesis	31/2297	106/14627	0.000300516361435503	0.00264873723218734	0.00186121516384779	AS03G02658-RA/AS01G01973-RA/AS02G01008-RA/AS07G01482-RA/AS04G00953-RA/AS03G00837-RA/AS09G00870-RA/AS01G03016-RA/AS03G02657-RA/AS11G02111-RA/AS08G03515-RA/AS01G03081-RA/AS05G00196-RA/AS09G00208-RA/AS10G00037-RA/AS06G02522-RA/AS01G01535-RA/AS08G01916-RA/AS07G01561-RA/AS07G00194-RA/AS06G00884-RA/AS01G03077-RA/AS11G00946-RA/AS01G03046-RA/AS07G03447-RA/AS05G00578-RA/AS07G03012-RA/AS08G00713-RA/AS05G00…	31	0.0134958641706574
44	ko04218	Cellular senescence	38/2297	140/14627	0.000361182070629281	0.00311109101746585	0.00218610200644039	AS09G00446-RA/AS01G01222-RA/AS06G02641-RA/AS07G00004-RA/AS07G01952-RA/AS08G02881-RA/AS05G01711-RA/AS07G03537-RA/AS10G00113-RA/AS02G03612-RA/AS10G02392-RA/AS04G00695-RA/AS04G01148-RA/AS11G02192-RA/AS02G03704-RA/AS05G02938-RA/AS03G00056-RA/AS03G01920-RA/AS11G01292-RA/AS06G02141-RA/AS10G00112-RA/AS08G01873-RA/AS05G03480-RA/AS08G01730-RA/AS10G00413-RA/AS03G02090-RA/AS10G01361-RA/AS04G00481-RA/AS07G02…	38	0.0165433173704832
45	ko04926	Relaxin signaling pathway	7/2297	11/14627	0.000428718387104578	0.00361076152694744	0.00253721057163645	AS01G01222-RA/AS08G02881-RA/AS11G02192-RA/AS08G03425-RA/AS08G01873-RA/AS05G00001-RA/AS07G02432-RA	7	0.00304745319982586
46	ko00906	Carotenoid biosynthesis	17/2297	48/14627	0.000647715964697	0.00533661631782963	0.00374993453245632	AS09G03024-RA/AS10G02852-RA/AS09G03090-RA/AS11G00825-RA/AS01G03032-RA/AS05G02818-RA/AS03G00761-RA/AS08G03466-RA/AS01G00137-RA/AS05G02175-RA/AS08G02838-RA/AS08G02992-RA/AS08G01482-RA/AS11G01188-RA/AS05G02176-RA/AS05G03716-RA/AS08G03051-RA	17	0.00740095777100566
47	ko00537	Glycosylphosphatidylinositol (GPI)-anchored proteins [BR:ko00537]	11/2297	25/14627	0.000730318616434193	0.0058891650133736	0.00413819955112768	AS09G00741-RA/AS07G00639-RA/AS02G01865-RA/AS03G00319-RA/AS10G01587-RA/AS04G00862-RA/AS11G02145-RA/AS07G01590-RA/AS10G02943-RA/AS07G00781-RA/AS11G02147-RA	11	0.00478885502829778
48	ko02026	Biofilm formation - Escherichia coli	8/2297	15/14627	0.000830869384492341	0.0064265203412775	0.00451578849144065	AS10G01628-RA/AS08G01036-RA/AS06G00860-RA/AS10G00223-RA/AS10G00823-RA/AS08G02713-RA/AS07G02652-RA/AS01G02103-RA	8	0.00348280365694384
49	ko04725	Cholinergic synapse	8/2297	15/14627	0.000830869384492341	0.0064265203412775	0.00451578849144065	AS01G01222-RA/AS08G02881-RA/AS11G02192-RA/AS08G03425-RA/AS08G01873-RA/AS02G01816-RA/AS05G00001-RA/AS07G02432-RA	8	0.00348280365694384
50	ko04713	Circadian entrainment	13/2297	33/14627	0.00088074214754464	0.00667602547838837	0.00469111080692198	AS01G01222-RA/AS08G02881-RA/AS04G01148-RA/AS08G03425-RA/AS08G01873-RA/AS10G00413-RA/AS02G01816-RA/AS05G00001-RA/AS04G00481-RA/AS07G00952-RA/AS07G02432-RA/AS04G01789-RA/AS10G00860-RA	13	0.00565955594253374
51	ko05221	Acute myeloid leukemia	10/2297	22/14627	0.000934852684415034	0.00694723857633918	0.00488168687630555	AS09G00446-RA/AS01G01222-RA/AS08G02881-RA/AS07G03537-RA/AS11G02192-RA/AS08G01873-RA/AS08G01730-RA/AS01G01202-RA/AS07G02432-RA/AS08G03142-RA	10	0.0043535045711798
52	ko05034	Alcoholism	37/2297	142/14627	0.000988823841747783	0.00720700453889249	0.00506421927048966	AS01G01222-RA/AS01G01212-RA/AS08G02881-RA/AS02G00735-RA/AS10G00113-RA/AS08G01488-RA/AS01G01174-RA/AS08G01489-RA/AS03G00483-RA/AS04G01148-RA/AS11G02192-RA/AS07G02472-RA/AS08G01621-RA/AS03G01920-RA/AS01G03667-RA/AS02G00600-RA/AS08G03425-RA/AS09G02541-RA/AS08G01622-RA/AS02G01109-RA/AS08G01873-RA/AS01G01297-RA/AS02G00588-RA/AS05G01245-RA/AS10G00413-RA/AS02G02959-RA/AS05G00001-RA/AS04G00481-RA/AS08G01…	37	0.0161079669133653
53	ko04750	Inflammatory mediator regulation of TRP channels	22/2297	72/14627	0.00114346187755466	0.00797987327211723	0.00560729881362494	AS03G02658-RA/AS10G00113-RA/AS04G01148-RA/AS01G01973-RA/AS07G01482-RA/AS03G01920-RA/AS01G03016-RA/AS03G02657-RA/AS11G02111-RA/AS10G00037-RA/AS10G00413-RA/AS02G01816-RA/AS07G01561-RA/AS04G00481-RA/AS07G02047-RA/AS07G00952-RA/AS07G03447-RA/AS05G00577-RA/AS02G02932-RA/AS01G02713-RA/AS04G01789-RA/AS10G00860-RA	22	0.00957771005659556
54	ko04040	Ion channels [BR:ko04040]	27/2297	95/14627	0.00115583931344069	0.00797987327211723	0.00560729881362494	AS01G03574-RA/AS07G00004-RA/AS01G02104-RA/AS09G00804-RA/AS11G01032-RA/AS06G01506-RA/AS01G01339-RA/AS04G02962-RA/AS02G00211-RA/AS06G02141-RA/AS01G00687-RA/AS04G02413-RA/AS10G00112-RA/AS06G00383-RA/AS02G00142-RA/AS04G01129-RA/AS02G00145-RA/AS10G00204-RA/AS05G00484-RA/AS09G01556-RA/AS10G02706-RA/AS10G00203-RA/AS08G02610-RA/AS01G02112-RA/AS11G02118-RA/AS02G00719-RA/AS01G00575-RA	27	0.0117544623421855
55	ko04015	Rap1 signaling pathway	16/2297	46/14627	0.00115802910281385	0.00797987327211723	0.00560729881362494	AS07G00735-RA/AS01G01222-RA/AS08G02881-RA/AS03G01023-RA/AS05G00394-RA/AS04G01148-RA/AS11G02192-RA/AS08G03425-RA/AS08G01873-RA/AS10G00413-RA/AS05G00001-RA/AS04G00481-RA/AS07G00952-RA/AS07G02432-RA/AS04G01789-RA/AS10G00860-RA	16	0.00696560731388768
56	ko00945	Stilbenoid, diarylheptanoid and gingerol biosynthesis	14/2297	38/14627	0.00122718544178612	0.00830541575780248	0.00583605106714075	AS01G00430-RA/AS06G01910-RA/AS08G03457-RA/AS08G00542-RA/AS07G02808-RA/AS10G01761-RA/AS01G01527-RA/AS02G03270-RA/AS10G01250-RA/AS06G01052-RA/AS11G02161-RA/AS06G03794-RA/AS08G02081-RA/AS06G01899-RA	14	0.00609490639965172
57	ko01040	Biosynthesis of unsaturated fatty acids	20/2297	64/14627	0.00138787129168509	0.00922812665874821	0.00648442173215747	AS11G01546-RA/AS05G03642-RA/AS03G01609-RA/AS05G01799-RA/AS04G01427-RA/AS11G00189-RA/AS04G00012-RA/AS06G03537-RA/AS02G03590-RA/AS06G00072-RA/AS06G00509-RA/AS01G01960-RA/AS08G01916-RA/AS01G03612-RA/AS03G00440-RA/AS07G03224-RA/AS03G00486-RA/AS03G00488-RA/AS02G00275-RA/AS03G00487-RA	20	0.0087070091423596
58	ko05030	Cocaine addiction	6/2297	10/14627	0.00176450041451242	0.0115300975362105	0.00810197105030205	AS08G01488-RA/AS08G01489-RA/AS08G03425-RA/AS05G00001-RA/AS08G01490-RA/AS02G02034-RA	6	0.00261210274270788
59	ko04912	GnRH signaling pathway	17/2297	52/14627	0.0017956266028817	0.0115346183473248	0.00810514773468455	AS01G01222-RA/AS05G03414-RA/AS08G02881-RA/AS10G00380-RA/AS04G01148-RA/AS11G02192-RA/AS04G03685-RA/AS08G01873-RA/AS10G00413-RA/AS02G01816-RA/AS04G00481-RA/AS07G00952-RA/AS07G02432-RA/AS05G00053-RA/AS04G01789-RA/AS05G03142-RA/AS10G00860-RA	17	0.00740095777100566
60	ko05223	Non-small cell lung cancer	9/2297	20/14627	0.00184038819516512	0.0116251187661263	0.00816874058555746	AS01G01222-RA/AS08G02881-RA/AS05G01911-RA/AS11G02192-RA/AS06G03727-RA/AS05G02938-RA/AS08G01873-RA/AS09G00894-RA/AS07G02432-RA	9	0.00391815411406182
61	ko00982	Drug metabolism - cytochrome P450	19/2297	61/14627	0.00188826943598852	0.0116900983089195	0.00821440042259864	AS11G00382-RA/AS03G00454-RA/AS07G01174-RA/AS11G00869-RA/AS10G00416-RA/AS02G00173-RA/AS04G02369-RA/AS04G03468-RA/AS07G01164-RA/AS11G02363-RA/AS11G02362-RA/AS08G00391-RA/AS11G00868-RA/AS09G00786-RA/AS07G01160-RA/AS11G02355-RA/AS05G01748-RA/AS01G02713-RA/AS01G03033-RA	19	0.00827165868524162
62	ko04910	Insulin signaling pathway	34/2297	132/14627	0.00191236436715834	0.0116900983089195	0.00821440042259864	AS01G02601-RA/AS01G01222-RA/AS08G02881-RA/AS09G00635-RA/AS08G01809-RA/AS05G03339-RA/AS10G00113-RA/AS05G01911-RA/AS04G01148-RA/AS11G02192-RA/AS06G02561-RA/AS03G02471-RA/AS03G01920-RA/AS04G00977-RA/AS10G01394-RA/AS10G00823-RA/AS08G02853-RA/AS06G02718-RA/AS08G02713-RA/AS02G00704-RA/AS11G00212-RA/AS08G01873-RA/AS10G00413-RA/AS07G02652-RA/AS02G00537-RA/AS04G00481-RA/AS07G02047-RA/AS06G00263-RA/AS07G00…	34	0.0148019155420113
63	ko04611	Platelet activation	9/2297	21/14627	0.00277603135235356	0.0164393106647188	0.0115515778313397	AS01G01222-RA/AS08G02881-RA/AS10G00113-RA/AS03G01920-RA/AS08G03425-RA/AS08G01873-RA/AS05G00001-RA/AS07G02047-RA/AS07G02432-RA	9	0.00391815411406182
64	ko04664	Fc epsilon RI signaling pathway	9/2297	21/14627	0.00277603135235356	0.0164393106647188	0.0115515778313397	AS07G00735-RA/AS01G01222-RA/AS08G02881-RA/AS03G01023-RA/AS05G01911-RA/AS05G00394-RA/AS11G02192-RA/AS08G01873-RA/AS07G02432-RA	9	0.00391815411406182
65	ko00950	Isoquinoline alkaloid biosynthesis	13/2297	37/14627	0.00296724275690846	0.0170391667404289	0.011973084808578	AS03G02124-RA/AS08G01488-RA/AS02G03760-RA/AS01G00141-RA/AS08G01489-RA/AS08G01172-RA/AS01G00140-RA/AS07G01179-RA/AS06G01696-RA/AS09G00131-RA/AS08G01490-RA/AS02G03336-RA/AS02G02034-RA	13	0.00565955594253374
66	ko04625	C-type lectin receptor signaling pathway	13/2297	37/14627	0.00296724275690846	0.0170391667404289	0.011973084808578	AS01G01222-RA/AS07G01952-RA/AS08G02881-RA/AS05G01711-RA/AS04G01148-RA/AS02G03704-RA/AS08G01873-RA/AS10G00413-RA/AS04G00481-RA/AS07G00952-RA/AS07G02432-RA/AS04G01789-RA/AS10G00860-RA	13	0.00565955594253374
67	ko05214	Glioma	15/2297	46/14627	0.00336426871621332	0.018507415660063	0.0130047942285681	AS01G01222-RA/AS08G02881-RA/AS04G01148-RA/AS11G02192-RA/AS06G03727-RA/AS05G02938-RA/AS08G01873-RA/AS10G00413-RA/AS02G01816-RA/AS04G00481-RA/AS04G00859-RA/AS07G00952-RA/AS07G02432-RA/AS04G01789-RA/AS10G00860-RA	15	0.0065302568567697
68	ko05216	Thyroid cancer	6/2297	11/14627	0.00336743884740183	0.018507415660063	0.0130047942285681	AS01G01222-RA/AS08G02881-RA/AS11G02192-RA/AS06G03727-RA/AS08G01873-RA/AS07G02432-RA	6	0.00261210274270788
69	ko04024	cAMP signaling pathway	25/2297	92/14627	0.00336942395921991	0.018507415660063	0.0130047942285681	AS07G00735-RA/AS01G01222-RA/AS05G03414-RA/AS08G02881-RA/AS03G01023-RA/AS11G01546-RA/AS10G00113-RA/AS05G00394-RA/AS10G00380-RA/AS04G01148-RA/AS11G02192-RA/AS03G01920-RA/AS06G03537-RA/AS08G03425-RA/AS08G01873-RA/AS10G00413-RA/AS02G01816-RA/AS05G00001-RA/AS04G00481-RA/AS07G02047-RA/AS07G00952-RA/AS07G02432-RA/AS04G01789-RA/AS05G03142-RA/AS10G00860-RA	25	0.0108837614279495
70	ko00592	alpha-Linolenic acid metabolism	20/2297	69/14627	0.00373788914425866	0.0202379997953433	0.0142208414059766	AS03G02140-RA/AS11G01546-RA/AS05G00251-RA/AS10G02325-RA/AS07G03192-RA/AS06G03537-RA/AS08G00291-RA/AS05G01632-RA/AS11G01755-RA/AS01G00291-RA/AS05G01630-RA/AS10G00432-RA/AS10G02327-RA/AS10G02326-RA/AS07G02281-RA/AS07G00243-RA/AS10G00669-RA/AS10G01203-RA/AS04G02287-RA/AS04G02110-RA	20	0.0087070091423596
71	ko00980	Metabolism of xenobiotics by cytochrome P450	25/2297	93/14627	0.0039352154919242	0.021006291147032	0.014760704513815	AS11G00382-RA/AS03G00454-RA/AS07G01174-RA/AS10G00416-RA/AS02G00173-RA/AS04G02369-RA/AS04G03468-RA/AS07G01164-RA/AS11G02363-RA/AS01G01973-RA/AS07G01482-RA/AS04G00953-RA/AS11G02362-RA/AS11G02111-RA/AS08G00391-RA/AS09G00786-RA/AS07G00194-RA/AS06G00884-RA/AS07G01160-RA/AS11G02355-RA/AS05G01748-RA/AS07G03447-RA/AS05G00577-RA/AS01G02713-RA/AS01G03033-RA	25	0.0108837614279495
72	ko05204	Chemical carcinogenesis - DNA adducts	22/2297	79/14627	0.00416787500472946	0.0219392309276731	0.0154162628098911	AS03G00454-RA/AS07G01174-RA/AS10G00416-RA/AS04G03468-RA/AS07G01164-RA/AS11G02363-RA/AS01G01973-RA/AS07G01482-RA/AS04G00953-RA/AS11G02362-RA/AS11G02111-RA/AS08G00391-RA/AS09G00786-RA/AS07G00194-RA/AS06G00884-RA/AS07G01160-RA/AS11G02355-RA/AS05G01748-RA/AS07G03447-RA/AS05G00577-RA/AS01G02713-RA/AS01G03033-RA	22	0.00957771005659556
73	ko05200	Pathways in cancer	49/2297	216/14627	0.00422835676571523	0.0219527015644667	0.0154257283594225	AS07G00735-RA/AS09G00446-RA/AS01G01222-RA/AS05G03414-RA/AS08G02881-RA/AS03G01023-RA/AS03G00454-RA/AS07G01174-RA/AS07G03537-RA/AS10G00416-RA/AS11G02060-RA/AS05G03112-RA/AS05G00394-RA/AS04G03468-RA/AS07G01164-RA/AS11G02363-RA/AS10G00380-RA/AS04G01148-RA/AS11G02192-RA/AS06G00613-RA/AS06G03727-RA/AS05G02938-RA/AS11G01292-RA/AS08G03425-RA/AS11G02362-RA/AS08G01873-RA/AS10G01586-RA/AS08G00391-RA/AS08G01…	49	0.021332172398781
74	ko00941	Flavonoid biosynthesis	17/2297	56/14627	0.00430996170224412	0.0220739930425746	0.0155109574774931	AS01G00430-RA/AS06G01910-RA/AS08G03457-RA/AS08G00542-RA/AS07G02808-RA/AS10G01761-RA/AS01G01527-RA/AS02G03270-RA/AS10G01250-RA/AS06G01052-RA/AS04G01763-RA/AS11G02161-RA/AS09G01037-RA/AS05G03599-RA/AS06G03794-RA/AS08G02081-RA/AS06G01899-RA	17	0.00740095777100566
75	ko00591	Linoleic acid metabolism	18/2297	61/14627	0.00470290571127401	0.0237653501943047	0.0166994406309098	AS03G02140-RA/AS03G02658-RA/AS01G01973-RA/AS07G01482-RA/AS10G02325-RA/AS01G03016-RA/AS08G00291-RA/AS03G02657-RA/AS11G02111-RA/AS10G00037-RA/AS10G02327-RA/AS07G01561-RA/AS10G02326-RA/AS07G00243-RA/AS07G03447-RA/AS05G00577-RA/AS02G02932-RA/AS01G02713-RA	18	0.00783630822812364
76	ko04812	Cytoskeleton proteins [BR:ko04812]	58/2297	268/14627	0.00587681075849203	0.0292406996231526	0.0205468601712474	AS07G01716-RA/AS08G04018-RA/AS03G01883-RA/AS05G00624-RA/AS03G00064-RA/AS09G00728-RA/AS03G01991-RA/AS01G00532-RA/AS04G02221-RA/AS01G00133-RA/AS04G02502-RA/AS06G00614-RA/AS03G02551-RA/AS09G01150-RA/AS04G02432-RA/AS02G02423-RA/AS03G02853-RA/AS01G00050-RA/AS11G02110-RA/AS05G00158-RA/AS08G02860-RA/AS06G00575-RA/AS07G00333-RA/AS09G00868-RA/AS08G03044-RA/AS04G03104-RA/AS01G01552-RA/AS07G02612-RA/AS05G00…	58	0.0252503265128428
77	ko05418	Fluid shear stress and atherosclerosis	50/2297	225/14627	0.00594072261473022	0.0292406996231526	0.0205468601712474	AS07G00735-RA/AS06G00921-RA/AS08G00393-RA/AS06G00066-RA/AS03G01023-RA/AS03G00454-RA/AS07G01174-RA/AS10G00416-RA/AS08G01809-RA/AS05G03112-RA/AS05G00394-RA/AS04G03468-RA/AS07G01164-RA/AS05G03275-RA/AS01G00899-RA/AS04G00862-RA/AS06G01179-RA/AS11G02363-RA/AS04G01148-RA/AS07G03237-RA/AS03G02471-RA/AS07G00134-RA/AS04G00977-RA/AS09G03007-RA/AS11G02362-RA/AS08G01785-RA/AS02G03288-RA/AS08G01873-RA/AS08G00…	50	0.021767522855899
78	ko00350	Tyrosine metabolism	19/2297	67/14627	0.00602438070389575	0.0292723113689293	0.0205690731185644	AS11G00382-RA/AS02G00173-RA/AS03G02124-RA/AS04G00056-RA/AS08G01488-RA/AS02G03760-RA/AS04G02369-RA/AS01G00141-RA/AS08G01489-RA/AS08G01172-RA/AS10G02600-RA/AS01G00140-RA/AS07G01179-RA/AS06G01696-RA/AS09G00131-RA/AS08G01490-RA/AS02G03336-RA/AS02G02034-RA/AS04G02287-RA	19	0.00827165868524162
79	ko04540	Gap junction	13/2297	40/14627	0.00634637032463247	0.0301924673804524	0.0212156485134133	AS01G01222-RA/AS08G02881-RA/AS07G02612-RA/AS11G02192-RA/AS11G02370-RA/AS08G03425-RA/AS02G03781-RA/AS05G02220-RA/AS08G01873-RA/AS08G01447-RA/AS08G00804-RA/AS05G00001-RA/AS07G02432-RA	13	0.00565955594253374
80	ko05031	Amphetamine addiction	17/2297	58/14627	0.00637620785871907	0.0301924673804524	0.0212156485134133	AS07G01952-RA/AS05G01711-RA/AS10G00113-RA/AS08G01488-RA/AS08G01489-RA/AS04G01148-RA/AS02G03704-RA/AS03G01920-RA/AS10G00413-RA/AS02G01816-RA/AS04G00481-RA/AS08G01490-RA/AS07G02047-RA/AS02G02034-RA/AS07G00952-RA/AS04G01789-RA/AS10G00860-RA	17	0.00740095777100566
81	ko00360	Phenylalanine metabolism	15/2297	49/14627	0.00653240719049366	0.0301924673804524	0.0212156485134133	AS05G00460-RA/AS11G00382-RA/AS03G02124-RA/AS04G00056-RA/AS08G01488-RA/AS02G03760-RA/AS08G01489-RA/AS05G03296-RA/AS09G00131-RA/AS09G01800-RA/AS08G01490-RA/AS02G03336-RA/AS02G02034-RA/AS09G01796-RA/AS07G00607-RA	15	0.0065302568567697
82	ko04090	CD molecules [BR:ko04090]	15/2297	49/14627	0.00653240719049366	0.0301924673804524	0.0212156485134133	AS06G01355-RA/AS03G03038-RA/AS07G00639-RA/AS04G02857-RA/AS01G02345-RA/AS11G01724-RA/AS11G02145-RA/AS03G00527-RA/AS04G01279-RA/AS08G02302-RA/AS01G02387-RA/AS11G02147-RA/AS07G02596-RA/AS06G02731-RA/AS04G00967-RA	15	0.0065302568567697
83	ko04720	Long-term potentiation	18/2297	63/14627	0.00680301852824127	0.0306935496146256	0.0215677490695744	AS01G01222-RA/AS07G01952-RA/AS08G02881-RA/AS05G01711-RA/AS10G00113-RA/AS04G01148-RA/AS11G02192-RA/AS02G03704-RA/AS03G01920-RA/AS08G01873-RA/AS10G00413-RA/AS02G01816-RA/AS04G00481-RA/AS07G02047-RA/AS07G00952-RA/AS07G02432-RA/AS04G01789-RA/AS10G00860-RA	18	0.00783630822812364
84	ko04370	VEGF signaling pathway	12/2297	36/14627	0.00687092329341865	0.0306935496146256	0.0215677490695744	AS07G00735-RA/AS07G00405-RA/AS01G01222-RA/AS07G01952-RA/AS08G02881-RA/AS03G01023-RA/AS05G01711-RA/AS05G00394-RA/AS11G02192-RA/AS02G03704-RA/AS08G01873-RA/AS07G02432-RA	12	0.00522420548541576
85	ko05225	Hepatocellular carcinoma	23/2297	87/14627	0.00688377761805586	0.0306935496146256	0.0215677490695744	AS07G02423-RA/AS01G01222-RA/AS08G02881-RA/AS03G00454-RA/AS07G01174-RA/AS10G00416-RA/AS02G03130-RA/AS04G03468-RA/AS07G01164-RA/AS11G02363-RA/AS11G02192-RA/AS06G03727-RA/AS05G02938-RA/AS11G02362-RA/AS08G01873-RA/AS08G00391-RA/AS09G00786-RA/AS07G01160-RA/AS11G02355-RA/AS04G00859-RA/AS07G02432-RA/AS05G01748-RA/AS01G03033-RA	23	0.0100130605137135
86	ko00130	Ubiquinone and other terpenoid-quinone biosynthesis	14/2297	45/14627	0.0072399673114827	0.0319063675703714	0.022419972213037	AS04G00056-RA/AS07G02833-RA/AS02G03760-RA/AS09G02524-RA/AS01G01317-RA/AS05G00526-RA/AS06G02531-RA/AS06G02881-RA/AS01G01527-RA/AS10G00112-RA/AS08G01086-RA/AS07G01289-RA/AS09G01803-RA/AS03G00629-RA	14	0.00609490639965172
87	ko05218	Melanoma	8/2297	20/14627	0.00781109138304259	0.033713977539483	0.0236901439174815	AS01G01222-RA/AS08G02881-RA/AS11G02192-RA/AS06G03727-RA/AS05G02938-RA/AS08G01873-RA/AS04G00859-RA/AS07G02432-RA	8	0.00348280365694384
88	ko01524	Platinum drug resistance	23/2297	88/14627	0.00796737110936287	0.033713977539483	0.0236901439174815	AS01G01222-RA/AS08G02881-RA/AS03G00454-RA/AS07G01174-RA/AS10G00416-RA/AS05G01911-RA/AS04G03468-RA/AS07G01164-RA/AS11G02363-RA/AS06G03008-RA/AS02G03455-RA/AS11G02362-RA/AS08G03753-RA/AS08G01873-RA/AS08G00391-RA/AS09G00786-RA/AS07G01160-RA/AS11G02355-RA/AS07G02432-RA/AS06G02177-RA/AS05G01748-RA/AS02G03783-RA/AS01G03033-RA	23	0.0100130605137135
89	ko04380	Osteoclast differentiation	13/2297	41/14627	0.00798368310323987	0.033713977539483	0.0236901439174815	AS07G00735-RA/AS01G01222-RA/AS07G01952-RA/AS08G02881-RA/AS03G01023-RA/AS05G01711-RA/AS05G00394-RA/AS11G02192-RA/AS02G03704-RA/AS02G02925-RA/AS08G01873-RA/AS02G01095-RA/AS07G02432-RA	13	0.00565955594253374
90	ko04724	Glutamatergic synapse	15/2297	50/14627	0.00800595772705401	0.033713977539483	0.0236901439174815	AS01G01222-RA/AS05G03414-RA/AS07G01952-RA/AS08G02881-RA/AS05G01711-RA/AS10G00380-RA/AS02G03704-RA/AS05G01317-RA/AS08G03425-RA/AS08G01873-RA/AS04G01034-RA/AS05G01777-RA/AS05G00001-RA/AS07G02432-RA/AS05G03142-RA	15	0.0065302568567697
91	ko04921	Oxytocin signaling pathway	32/2297	134/14627	0.00862115289032476	0.0359056807190449	0.0252302103094525	AS01G01222-RA/AS07G01952-RA/AS08G02881-RA/AS05G01711-RA/AS08G01809-RA/AS10G00113-RA/AS06G01179-RA/AS04G01148-RA/AS11G02192-RA/AS02G03704-RA/AS03G02471-RA/AS03G01920-RA/AS04G00977-RA/AS08G03425-RA/AS09G03007-RA/AS02G00704-RA/AS08G01873-RA/AS06G02370-RA/AS10G00413-RA/AS04G00483-RA/AS02G01816-RA/AS05G00001-RA/AS04G00481-RA/AS07G02047-RA/AS07G00952-RA/AS07G02432-RA/AS06G01833-RA/AS04G01820-RA/AS07G01…	32	0.0139312146277754
92	ko05231	Choline metabolism in cancer	21/2297	79/14627	0.0089387915158216	0.0368239346140912	0.0258754491247467	AS07G00735-RA/AS01G01222-RA/AS05G03414-RA/AS08G02881-RA/AS03G01023-RA/AS09G00302-RA/AS05G01911-RA/AS05G00394-RA/AS05G02069-RA/AS10G00380-RA/AS11G02192-RA/AS04G00094-RA/AS04G03005-RA/AS08G01873-RA/AS11G00173-RA/AS07G02432-RA/AS05G01963-RA/AS06G00223-RA/AS04G02749-RA/AS05G03736-RA/AS05G03142-RA	21	0.00914235959947758
93	ko05219	Bladder cancer	6/2297	13/14627	0.00942775059519342	0.0382649957353325	0.0268880542175785	AS01G01222-RA/AS08G02881-RA/AS11G02192-RA/AS05G02938-RA/AS08G01873-RA/AS07G02432-RA	6	0.00261210274270788
94	ko04650	Natural killer cell mediated cytotoxicity	11/2297	33/14627	0.00949052664675794	0.0382649957353325	0.0268880542175785	AS07G00735-RA/AS01G01222-RA/AS07G01952-RA/AS08G02881-RA/AS03G01023-RA/AS05G01711-RA/AS05G00394-RA/AS11G02192-RA/AS02G03704-RA/AS08G01873-RA/AS07G02432-RA	11	0.00478885502829778
95	ko05212	Pancreatic cancer	15/2297	51/14627	0.00973216490340964	0.03882621577255	0.0272824124162065	AS07G00735-RA/AS01G01222-RA/AS05G03414-RA/AS08G02881-RA/AS03G01023-RA/AS11G02060-RA/AS05G00394-RA/AS10G00380-RA/AS11G02192-RA/AS06G03727-RA/AS05G02938-RA/AS08G01873-RA/AS10G01586-RA/AS07G02432-RA/AS05G03142-RA	15	0.0065302568567697
96	ko04971	Gastric acid secretion	9/2297	25/14627	0.0106875096154738	0.0421933973360894	0.0296484641745053	AS04G01148-RA/AS08G03425-RA/AS10G00413-RA/AS02G01816-RA/AS05G00001-RA/AS04G00481-RA/AS07G00952-RA/AS04G01789-RA/AS10G00860-RA	9	0.00391815411406182
97	ko04613	Neutrophil extracellular trap formation	35/2297	152/14627	0.0111305804016881	0.0434895873426781	0.0305592712059368	AS07G00735-RA/AS01G01222-RA/AS05G01955-RA/AS06G03372-RA/AS07G00004-RA/AS01G01212-RA/AS08G02881-RA/AS03G01023-RA/AS02G00735-RA/AS01G01174-RA/AS05G00394-RA/AS10G02392-RA/AS03G00483-RA/AS11G02192-RA/AS10G00524-RA/AS07G02472-RA/AS08G01621-RA/AS01G03667-RA/AS02G00600-RA/AS06G02141-RA/AS10G00112-RA/AS08G01622-RA/AS02G01109-RA/AS08G01873-RA/AS05G03480-RA/AS01G01297-RA/AS02G00588-RA/AS05G01245-RA/AS02G02…	35	0.0152372659991293
98	ko05205	Proteoglycans in cancer	18/2297	66/14627	0.0113158954198181	0.0437624935113375	0.0307510369625563	AS07G00735-RA/AS06G02117-RA/AS04G01358-RA/AS01G01222-RA/AS08G02881-RA/AS03G01023-RA/AS09G00635-RA/AS10G00113-RA/AS05G01911-RA/AS05G00394-RA/AS04G00862-RA/AS11G02192-RA/AS03G01920-RA/AS08G01873-RA/AS02G01816-RA/AS07G02047-RA/AS06G00263-RA/AS07G02432-RA	18	0.00783630822812364

## Sheet: DEGs-A10vsA5 （GO）
No.	Category	ID	term	Genes	adj_pvalue
1	BP	GO:0010200	response to chitin	AS07G03050-RA,AS11G01588-RA,AS11G01447-RA,AS06G03592-RA,AS01G03338-RA,AS01G01194-RA,AS08G00595-RA,AS04G00821-RA,AS03G00048-RA,AS01G00309-RA,AS04G02950-RA,AS01G03444-RA,AS08G00834-RA,AS05G00901-RA,AS11G02192-RA,AS03G00025-RA,AS05G00330-RA,AS01G02144-RA,AS08G01197-RA,AS03G02717-RA,AS09G02959-RA,AS08G00835-RA,AS08G03536-RA,AS05G00078-RA,AS01G01182-RA,AS09G00400-RA,AS02G01563-RA,AS05G00467-RA,AS02G02…	3.47594756814642e-11
2	BP	GO:0009414	response to water deprivation	AS07G00173-RA,AS05G00082-RA,AS03G00884-RA,AS07G02652-RA,AS07G01198-RA,AS04G02266-RA,AS06G03011-RA,AS07G01556-RA,AS05G01842-RA,AS03G02304-RA,AS09G02523-RA,AS02G03148-RA,AS06G02603-RA,AS10G00143-RA,AS03G02171-RA,AS08G03419-RA,AS06G03348-RA,AS01G03382-RA,AS06G03592-RA,AS02G00057-RA,AS02G01487-RA,AS05G02720-RA,AS05G00633-RA,AS06G02414-RA,AS02G01168-RA,AS04G02936-RA,AS07G03088-RA,AS10G01718-RA,AS02G00…	3.31865319093234e-10
3	BP	GO:0009415	response to water	AS07G00173-RA,AS05G00082-RA,AS03G00884-RA,AS07G02652-RA,AS07G01198-RA,AS04G02266-RA,AS06G03011-RA,AS07G01556-RA,AS05G01842-RA,AS03G02304-RA,AS09G02523-RA,AS02G03148-RA,AS06G02603-RA,AS10G00143-RA,AS03G02171-RA,AS08G03419-RA,AS06G03348-RA,AS01G03382-RA,AS06G03592-RA,AS02G00057-RA,AS02G01487-RA,AS05G02720-RA,AS05G00633-RA,AS06G02414-RA,AS02G01168-RA,AS04G02936-RA,AS07G03088-RA,AS10G01718-RA,AS02G00…	4.23353247055236e-10
4	CC	GO:0009505	plant-type cell wall	AS04G00009-RA,AS01G01753-RA,AS10G00350-RA,AS08G01962-RA,AS07G00514-RA,AS05G02230-RA,AS10G01519-RA,AS07G01535-RA,AS02G02346-RA,AS01G03411-RA,AS05G00809-RA,AS05G00389-RA,AS11G02587-RA,AS08G00705-RA,AS09G02424-RA,AS06G00985-RA,AS04G02538-RA,AS02G02347-RA,AS03G00289-RA,AS05G01265-RA,AS08G00550-RA,AS07G03374-RA,AS05G03367-RA,AS02G00905-RA,AS04G00986-RA,AS04G02056-RA,AS11G02137-RA,AS09G02370-RA,AS06G00…	1.95353074847936e-08
5	BP	GO:0019748	secondary metabolic process	AS05G01212-RA,AS04G02266-RA,AS01G00665-RA,AS01G03357-RA,AS09G00870-RA,AS06G00357-RA,AS02G01011-RA,AS06G02568-RA,AS08G02096-RA,AS03G00113-RA,AS01G01384-RA,AS04G02686-RA,AS01G03046-RA,AS08G02112-RA,AS09G00193-RA,AS03G01841-RA,AS09G00215-RA,AS01G03593-RA,AS08G00200-RA,AS10G00243-RA,AS03G02983-RA,AS01G02476-RA,AS02G02928-RA,AS08G00537-RA,AS01G03823-RA,AS04G01453-RA,AS04G02270-RA,AS06G03766-RA,AS11G02…	2.99049018806136e-08
6	BP	GO:0009834	plant-type secondary cell wall biogenesis	AS11G01454-RA,AS04G02428-RA,AS07G02689-RA,AS10G00350-RA,AS02G01011-RA,AS01G01384-RA,AS11G01054-RA,AS04G02686-RA,AS08G00495-RA,AS05G01492-RA,AS08G02903-RA,AS02G01402-RA,AS08G02088-RA,AS01G03747-RA,AS06G02964-RA,AS06G03003-RA,AS01G01251-RA,AS07G03239-RA,AS05G01661-RA,AS09G01066-RA,AS05G03241-RA,AS08G00735-RA,AS02G01081-RA,AS05G02391-RA,AS01G03423-RA,AS05G01264-RA,AS08G00494-RA,AS01G03108-RA,AS02G01…	1.24748491941094e-06
7	MF	GO:0008509	anion transmembrane transporter activity	AS02G00896-RA,AS07G01198-RA,AS05G00133-RA,AS02G02608-RA,AS09G01485-RA,AS06G02534-RA,AS10G01481-RA,AS08G02112-RA,AS10G00735-RA,AS08G00162-RA,AS08G00850-RA,AS07G02713-RA,AS11G01739-RA,AS07G02064-RA,AS01G01402-RA,AS03G01977-RA,AS04G00065-RA,AS04G03179-RA,AS08G03445-RA,AS01G01288-RA,AS06G01003-RA,AS09G01065-RA,AS11G01912-RA,AS10G01511-RA,AS02G01503-RA,AS04G02749-RA,AS11G00783-RA,AS03G01046-RA,AS10G01…	2.37594720853447e-06
8	CC	GO:0031226	intrinsic component of plasma membrane	AS02G03807-RA,AS10G01486-RA,AS07G03399-RA,AS04G00009-RA,AS06G03011-RA,AS01G02148-RA,AS08G02948-RA,AS02G00475-RA,AS02G02346-RA,AS07G03489-RA,AS07G00212-RA,AS01G01292-RA,AS08G01555-RA,AS05G00389-RA,AS07G00461-RA,AS08G03863-RA,AS08G01316-RA,AS02G02347-RA,AS11G01739-RA,AS04G03663-RA,AS01G00938-RA,AS05G01265-RA,AS03G00739-RA,AS01G03600-RA,AS09G00741-RA,AS09G00104-RA,AS06G00548-RA,AS06G02964-RA,AS07G01…	2.37594720853447e-06
9	BP	GO:0044550	secondary metabolite biosynthetic process	AS05G01212-RA,AS01G00665-RA,AS09G00870-RA,AS02G01011-RA,AS06G02568-RA,AS08G02096-RA,AS03G00113-RA,AS01G01384-RA,AS04G02686-RA,AS01G03046-RA,AS08G02112-RA,AS09G00193-RA,AS03G01841-RA,AS09G00215-RA,AS01G03593-RA,AS08G00200-RA,AS03G02983-RA,AS01G02476-RA,AS01G03823-RA,AS04G01453-RA,AS06G03766-RA,AS03G00048-RA,AS09G00633-RA,AS09G00047-RA,AS08G00713-RA,AS01G03077-RA,AS01G01031-RA,AS03G00837-RA,AS05G02…	2.37594720853447e-06
10	BP	GO:0098656	anion transmembrane transport	AS05G00082-RA,AS02G00896-RA,AS05G00133-RA,AS09G01485-RA,AS06G02534-RA,AS10G01481-RA,AS08G02112-RA,AS05G00633-RA,AS10G00735-RA,AS08G00162-RA,AS10G01718-RA,AS08G00850-RA,AS07G02713-RA,AS11G01739-RA,AS07G02064-RA,AS01G01402-RA,AS03G01977-RA,AS04G00065-RA,AS04G01662-RA,AS04G03179-RA,AS08G03445-RA,AS01G01288-RA,AS06G01003-RA,AS09G01065-RA,AS11G01912-RA,AS10G02794-RA,AS10G01511-RA,AS02G01503-RA,AS04G02…	3.24419936764342e-06
11	BP	GO:0010243	response to organonitrogen compound	AS07G00173-RA,AS07G03050-RA,AS11G01588-RA,AS11G01447-RA,AS03G01102-RA,AS04G03104-RA,AS04G02962-RA,AS06G03592-RA,AS04G01774-RA,AS06G02414-RA,AS01G03338-RA,AS09G02870-RA,AS08G00475-RA,AS01G01194-RA,AS06G00700-RA,AS08G00595-RA,AS06G01506-RA,AS04G00821-RA,AS03G00048-RA,AS01G00309-RA,AS04G02950-RA,AS01G03444-RA,AS03G01878-RA,AS08G00834-RA,AS07G01478-RA,AS05G00901-RA,AS11G02192-RA,AS03G00025-RA,AS05G00…	1.12527464644349e-05
12	BP	GO:0071554	cell wall organization or biogenesis	AS11G01454-RA,AS04G02428-RA,AS07G02689-RA,AS10G00350-RA,AS11G01636-RA,AS06G02856-RA,AS02G01011-RA,AS10G01519-RA,AS01G01384-RA,AS08G03558-RA,AS11G01054-RA,AS04G02686-RA,AS08G00495-RA,AS05G01492-RA,AS05G01757-RA,AS05G00809-RA,AS05G01994-RA,AS08G02903-RA,AS06G00328-RA,AS09G02424-RA,AS11G01586-RA,AS03G01000-RA,AS07G00877-RA,AS01G00641-RA,AS06G02919-RA,AS01G00938-RA,AS07G03374-RA,AS04G02400-RA,AS02G01…	1.12527464644349e-05
13	CC	GO:0005887	integral component of plasma membrane	AS02G03807-RA,AS07G03399-RA,AS06G03011-RA,AS08G02948-RA,AS02G00475-RA,AS07G03489-RA,AS07G00212-RA,AS08G01555-RA,AS07G00461-RA,AS08G03863-RA,AS08G01316-RA,AS11G01739-RA,AS03G00739-RA,AS01G03600-RA,AS09G00104-RA,AS06G02964-RA,AS07G01392-RA,AS02G00680-RA,AS10G01511-RA,AS05G01517-RA,AS03G02925-RA,AS08G03133-RA,AS10G01414-RA,AS11G00422-RA,AS02G00313-RA,AS07G03239-RA,AS02G00199-RA,AS01G01339-RA,AS10G02…	1.25057374125982e-05
14	BP	GO:0006820	anion transport	AS05G00082-RA,AS02G00896-RA,AS07G01556-RA,AS05G00133-RA,AS07G00237-RA,AS04G02686-RA,AS09G01485-RA,AS06G02534-RA,AS10G01481-RA,AS08G02112-RA,AS05G00633-RA,AS10G00735-RA,AS08G00162-RA,AS10G01718-RA,AS08G00850-RA,AS07G02713-RA,AS11G01739-RA,AS07G02064-RA,AS01G01402-RA,AS05G00397-RA,AS03G01977-RA,AS04G00065-RA,AS04G01662-RA,AS04G03179-RA,AS08G03445-RA,AS01G01288-RA,AS06G01003-RA,AS09G01065-RA,AS11G01…	1.25057374125982e-05
15	BP	GO:0009624	response to nematode	AS07G01198-RA,AS05G00133-RA,AS01G03792-RA,AS03G02304-RA,AS06G03390-RA,AS04G01287-RA,AS08G03684-RA,AS01G03406-RA,AS11G02591-RA,AS08G00850-RA,AS01G01402-RA,AS04G03179-RA,AS04G03389-RA,AS08G03133-RA,AS07G00855-RA,AS10G01083-RA,AS03G01878-RA,AS04G02575-RA,AS02G00644-RA,AS08G03753-RA,AS08G00398-RA,AS06G00575-RA,AS05G01248-RA,AS02G03117-RA,AS11G02048-RA,AS04G03455-RA,AS03G00320-RA,AS02G03707-RA,AS09G00…	5.50774438963241e-05
16	BP	GO:0009606	tropism	AS05G00082-RA,AS07G01198-RA,AS10G01892-RA,AS02G01323-RA,AS05G02230-RA,AS10G00143-RA,AS06G00881-RA,AS04G02962-RA,AS01G01620-RA,AS07G03044-RA,AS04G02674-RA,AS01G01402-RA,AS05G00397-RA,AS06G01895-RA,AS07G01953-RA,AS10G02794-RA,AS03G02705-RA,AS07G00855-RA,AS06G01986-RA,AS07G01546-RA,AS11G01623-RA,AS07G01458-RA,AS06G03379-RA,AS04G03629-RA,AS11G00720-RA,AS02G03234-RA,AS01G00512-RA,AS05G03507-RA,AS06G00…	7.65795697323749e-05
17	MF	GO:0005342	organic acid transmembrane transporter activity	AS02G00896-RA,AS05G00133-RA,AS10G01481-RA,AS08G02112-RA,AS10G00735-RA,AS08G00162-RA,AS08G00850-RA,AS01G01402-RA,AS04G03179-RA,AS08G03445-RA,AS06G01003-RA,AS09G01065-RA,AS10G01511-RA,AS11G00783-RA,AS03G01046-RA,AS07G02107-RA,AS09G00627-RA,AS07G00855-RA,AS06G02156-RA,AS04G00337-RA,AS09G00475-RA,AS08G00398-RA,AS05G01248-RA,AS04G01032-RA,AS10G00774-RA,AS07G00771-RA,AS03G00499-RA,AS02G02233-RA,AS03G00…	9.74018128174552e-05
18	MF	GO:0046943	carboxylic acid transmembrane transporter activity	AS02G00896-RA,AS05G00133-RA,AS10G01481-RA,AS08G02112-RA,AS10G00735-RA,AS08G00162-RA,AS08G00850-RA,AS01G01402-RA,AS04G03179-RA,AS08G03445-RA,AS06G01003-RA,AS09G01065-RA,AS10G01511-RA,AS11G00783-RA,AS03G01046-RA,AS07G02107-RA,AS09G00627-RA,AS07G00855-RA,AS06G02156-RA,AS04G00337-RA,AS09G00475-RA,AS08G00398-RA,AS05G01248-RA,AS04G01032-RA,AS10G00774-RA,AS07G00771-RA,AS03G00499-RA,AS02G02233-RA,AS03G00…	9.74018128174552e-05
19	BP	GO:0071669	plant-type cell wall organization or biogenesis	AS11G01454-RA,AS04G02428-RA,AS07G02689-RA,AS10G00350-RA,AS02G01011-RA,AS10G01519-RA,AS01G01384-RA,AS11G01054-RA,AS04G02686-RA,AS08G00495-RA,AS05G01492-RA,AS05G01994-RA,AS08G02903-RA,AS06G00328-RA,AS09G02424-RA,AS07G00877-RA,AS01G00641-RA,AS06G02919-RA,AS07G03374-RA,AS02G01402-RA,AS08G02088-RA,AS01G03747-RA,AS06G02964-RA,AS04G02432-RA,AS06G03003-RA,AS04G00580-RA,AS03G02925-RA,AS05G02449-RA,AS08G01…	9.74018128174552e-05
20	BP	GO:1903825	organic acid transmembrane transport	AS02G00896-RA,AS05G00133-RA,AS10G01481-RA,AS08G02112-RA,AS10G00735-RA,AS08G00162-RA,AS08G00850-RA,AS01G01402-RA,AS04G03179-RA,AS08G03445-RA,AS06G01003-RA,AS09G01065-RA,AS10G01511-RA,AS11G00783-RA,AS03G01046-RA,AS07G02107-RA,AS09G00627-RA,AS07G00855-RA,AS06G02156-RA,AS04G00337-RA,AS09G00475-RA,AS08G00398-RA,AS05G01248-RA,AS04G01032-RA,AS10G00774-RA,AS07G00771-RA,AS03G00499-RA,AS02G02233-RA,AS03G00…	9.74018128174552e-05
21	BP	GO:1905039	carboxylic acid transmembrane transport	AS02G00896-RA,AS05G00133-RA,AS10G01481-RA,AS08G02112-RA,AS10G00735-RA,AS08G00162-RA,AS08G00850-RA,AS01G01402-RA,AS04G03179-RA,AS08G03445-RA,AS06G01003-RA,AS09G01065-RA,AS10G01511-RA,AS11G00783-RA,AS03G01046-RA,AS07G02107-RA,AS09G00627-RA,AS07G00855-RA,AS06G02156-RA,AS04G00337-RA,AS09G00475-RA,AS08G00398-RA,AS05G01248-RA,AS04G01032-RA,AS10G00774-RA,AS07G00771-RA,AS03G00499-RA,AS02G02233-RA,AS03G00…	9.74018128174552e-05
22	MF	GO:0016705	oxidoreductase activity, acting on paired donors, with incorporation or reduction of molecular oxygen	AS09G00870-RA,AS08G02096-RA,AS01G03046-RA,AS01G03184-RA,AS09G00215-RA,AS02G01497-RA,AS06G02612-RA,AS06G01691-RA,AS02G03364-RA,AS08G01417-RA,AS01G03823-RA,AS04G01453-RA,AS11G02648-RA,AS03G00485-RA,AS05G02907-RA,AS05G03642-RA,AS09G00047-RA,AS02G03209-RA,AS01G03077-RA,AS03G00837-RA,AS09G00043-RA,AS05G00196-RA,AS03G01869-RA,AS01G00297-RA,AS02G02722-RA,AS04G03292-RA,AS08G01482-RA,AS04G02158-RA,AS01G00…	0.000110174290132744
23	BP	GO:0016143	S-glycoside metabolic process	AS04G02266-RA,AS01G03357-RA,AS06G02568-RA,AS08G02112-RA,AS03G01841-RA,AS08G00200-RA,AS02G02928-RA,AS08G00537-RA,AS01G03823-RA,AS04G02270-RA,AS07G01380-RA,AS01G03077-RA,AS04G02094-RA,AS08G02080-RA,AS07G03079-RA,AS03G00837-RA,AS05G00196-RA,AS05G02938-RA,AS04G02269-RA,AS04G00781-RA,AS10G00582-RA,AS02G01008-RA,AS01G03356-RA,AS05G00522-RA,AS01G03359-RA,AS06G00583-RA,AS06G00582-RA,AS01G03824-RA,AS01G03…	0.000170715496316093
24	BP	GO:0019757	glycosinolate metabolic process	AS04G02266-RA,AS01G03357-RA,AS06G02568-RA,AS08G02112-RA,AS03G01841-RA,AS08G00200-RA,AS02G02928-RA,AS08G00537-RA,AS01G03823-RA,AS04G02270-RA,AS07G01380-RA,AS01G03077-RA,AS04G02094-RA,AS08G02080-RA,AS07G03079-RA,AS03G00837-RA,AS05G00196-RA,AS05G02938-RA,AS04G02269-RA,AS04G00781-RA,AS10G00582-RA,AS02G01008-RA,AS01G03356-RA,AS05G00522-RA,AS01G03359-RA,AS06G00583-RA,AS06G00582-RA,AS01G03824-RA,AS01G03…	0.000170715496316093
25	BP	GO:0019760	glucosinolate metabolic process	AS04G02266-RA,AS01G03357-RA,AS06G02568-RA,AS08G02112-RA,AS03G01841-RA,AS08G00200-RA,AS02G02928-RA,AS08G00537-RA,AS01G03823-RA,AS04G02270-RA,AS07G01380-RA,AS01G03077-RA,AS04G02094-RA,AS08G02080-RA,AS07G03079-RA,AS03G00837-RA,AS05G00196-RA,AS05G02938-RA,AS04G02269-RA,AS04G00781-RA,AS10G00582-RA,AS02G01008-RA,AS01G03356-RA,AS05G00522-RA,AS01G03359-RA,AS06G00583-RA,AS06G00582-RA,AS01G03824-RA,AS01G03…	0.000170715496316093
26	BP	GO:2000652	regulation of secondary cell wall biogenesis	AS04G02686-RA,AS08G00495-RA,AS02G01402-RA,AS08G02088-RA,AS05G01661-RA,AS09G01066-RA,AS08G00735-RA,AS02G01081-RA,AS05G02391-RA,AS01G03423-RA,AS05G01264-RA,AS08G00494-RA,AS06G00321-RA,AS07G00220-RA,AS11G00148-RA,AS01G01864-RA	0.000170715496316093
27	BP	GO:0042546	cell wall biogenesis	AS11G01454-RA,AS04G02428-RA,AS07G02689-RA,AS10G00350-RA,AS06G02856-RA,AS02G01011-RA,AS01G01384-RA,AS11G01054-RA,AS04G02686-RA,AS08G00495-RA,AS05G01492-RA,AS08G02903-RA,AS11G01586-RA,AS07G00877-RA,AS01G00641-RA,AS02G01402-RA,AS02G03513-RA,AS08G02088-RA,AS01G03747-RA,AS06G02964-RA,AS06G03003-RA,AS05G02449-RA,AS08G01422-RA,AS01G02343-RA,AS01G01251-RA,AS01G02730-RA,AS07G03239-RA,AS05G01661-RA,AS09G01…	0.000426179935769262
28	BP	GO:0046942	carboxylic acid transport	AS02G00896-RA,AS05G00133-RA,AS10G01481-RA,AS08G02112-RA,AS10G00735-RA,AS08G00162-RA,AS08G00850-RA,AS01G01402-RA,AS04G03179-RA,AS08G03445-RA,AS06G01003-RA,AS09G01065-RA,AS10G01511-RA,AS11G00783-RA,AS03G01046-RA,AS07G02107-RA,AS09G00627-RA,AS07G00855-RA,AS07G03532-RA,AS06G02156-RA,AS04G00337-RA,AS09G00475-RA,AS08G00398-RA,AS05G01248-RA,AS04G01032-RA,AS10G00774-RA,AS07G00771-RA,AS03G00499-RA,AS02G02…	0.00044187940167182
29	MF	GO:0004497	monooxygenase activity	AS09G00870-RA,AS03G00701-RA,AS08G02096-RA,AS05G02429-RA,AS01G03046-RA,AS01G03184-RA,AS04G00608-RA,AS09G00215-RA,AS02G01497-RA,AS01G03823-RA,AS04G01453-RA,AS11G02648-RA,AS09G00047-RA,AS01G03077-RA,AS05G03438-RA,AS03G00837-RA,AS06G00607-RA,AS09G00043-RA,AS05G00196-RA,AS03G01869-RA,AS01G00297-RA,AS06G02080-RA,AS04G03292-RA,AS08G01482-RA,AS01G00678-RA,AS07G02326-RA,AS01G02076-RA,AS03G00648-RA,AS07G00…	0.000604451883261659
30	MF	GO:0008514	organic anion transmembrane transporter activity	AS02G00896-RA,AS05G00133-RA,AS06G02534-RA,AS10G01481-RA,AS08G02112-RA,AS10G00735-RA,AS08G00162-RA,AS08G00850-RA,AS07G02713-RA,AS01G01402-RA,AS04G03179-RA,AS08G03445-RA,AS01G01288-RA,AS06G01003-RA,AS09G01065-RA,AS11G01912-RA,AS10G01511-RA,AS04G02749-RA,AS11G00783-RA,AS03G01046-RA,AS07G02107-RA,AS09G00627-RA,AS07G00855-RA,AS03G01776-RA,AS06G02156-RA,AS04G00337-RA,AS09G00475-RA,AS04G00431-RA,AS08G00…	0.000604451883261659
31	BP	GO:0015849	organic acid transport	AS02G00896-RA,AS05G00133-RA,AS10G01481-RA,AS08G02112-RA,AS10G00735-RA,AS08G00162-RA,AS08G00850-RA,AS01G01402-RA,AS04G03179-RA,AS08G03445-RA,AS06G01003-RA,AS09G01065-RA,AS10G01511-RA,AS11G00783-RA,AS03G01046-RA,AS07G02107-RA,AS09G00627-RA,AS07G00855-RA,AS07G03532-RA,AS06G02156-RA,AS04G00337-RA,AS09G00475-RA,AS08G00398-RA,AS05G01248-RA,AS04G01032-RA,AS10G00774-RA,AS07G00771-RA,AS03G00499-RA,AS02G02…	0.000604451883261659
32	BP	GO:0009991	response to extracellular stimulus	AS05G00082-RA,AS03G00884-RA,AS07G01556-RA,AS02G00475-RA,AS08G02493-RA,AS09G02523-RA,AS05G01863-RA,AS04G03104-RA,AS02G01117-RA,AS04G02686-RA,AS03G02171-RA,AS08G03419-RA,AS01G03155-RA,AS05G01757-RA,AS02G00057-RA,AS04G01774-RA,AS04G02936-RA,AS09G02870-RA,AS05G02011-RA,AS07G02064-RA,AS05G00397-RA,AS04G02344-RA,AS08G00475-RA,AS08G01809-RA,AS11G00774-RA,AS09G01065-RA,AS10G01416-RA,AS03G02983-RA,AS03G02…	0.00077393059103865
33	BP	GO:1901698	response to nitrogen compound	AS07G00173-RA,AS07G03050-RA,AS11G01588-RA,AS11G01447-RA,AS03G01102-RA,AS04G03104-RA,AS04G03487-RA,AS04G02962-RA,AS06G03592-RA,AS04G01774-RA,AS10G01934-RA,AS06G02414-RA,AS01G03338-RA,AS09G02870-RA,AS08G00475-RA,AS01G02770-RA,AS01G01194-RA,AS09G01065-RA,AS06G00700-RA,AS08G00595-RA,AS02G01503-RA,AS06G00038-RA,AS10G02925-RA,AS06G01506-RA,AS04G00821-RA,AS02G02786-RA,AS10G01747-RA,AS09G01556-RA,AS06G00…	0.00100309607434477
34	BP	GO:1903338	regulation of cell wall organization or biogenesis	AS10G00350-RA,AS04G02686-RA,AS08G00495-RA,AS02G01402-RA,AS08G02088-RA,AS05G01661-RA,AS09G01066-RA,AS03G00064-RA,AS08G00735-RA,AS02G01081-RA,AS05G02391-RA,AS01G03423-RA,AS04G00943-RA,AS05G01264-RA,AS08G00494-RA,AS06G00321-RA,AS07G00220-RA,AS11G00148-RA,AS01G01864-RA	0.0010500061166945
35	BP	GO:0003333	amino acid transmembrane transport	AS02G00896-RA,AS05G00133-RA,AS10G00735-RA,AS08G00162-RA,AS08G00850-RA,AS01G01402-RA,AS06G01003-RA,AS10G01511-RA,AS07G00855-RA,AS06G02156-RA,AS09G00475-RA,AS05G01248-RA,AS04G01032-RA,AS10G00774-RA,AS07G00771-RA,AS03G00499-RA,AS02G02233-RA,AS03G00501-RA,AS09G00443-RA,AS02G03707-RA,AS05G03476-RA,AS05G02043-RA,AS03G01423-RA,AS05G01171-RA,AS01G03662-RA,AS05G03527-RA,AS01G00507-RA,AS03G02772-RA,AS04G01…	0.00129205090482355
36	BP	GO:0006865	amino acid transport	AS02G00896-RA,AS05G00133-RA,AS10G00735-RA,AS08G00162-RA,AS08G00850-RA,AS01G01402-RA,AS06G01003-RA,AS10G01511-RA,AS07G00855-RA,AS06G02156-RA,AS09G00475-RA,AS05G01248-RA,AS04G01032-RA,AS10G00774-RA,AS07G00771-RA,AS03G00499-RA,AS02G02233-RA,AS03G00501-RA,AS09G00443-RA,AS02G03707-RA,AS05G03476-RA,AS05G02043-RA,AS03G01423-RA,AS05G01171-RA,AS01G03662-RA,AS05G03527-RA,AS01G00507-RA,AS03G02772-RA,AS04G01…	0.00129205090482355
37	MF	GO:0015171	amino acid transmembrane transporter activity	AS02G00896-RA,AS05G00133-RA,AS10G00735-RA,AS08G00162-RA,AS08G00850-RA,AS01G01402-RA,AS06G01003-RA,AS10G01511-RA,AS07G00855-RA,AS06G02156-RA,AS09G00475-RA,AS05G01248-RA,AS04G01032-RA,AS10G00774-RA,AS07G00771-RA,AS03G00499-RA,AS02G02233-RA,AS03G00501-RA,AS09G00443-RA,AS02G03707-RA,AS05G03476-RA,AS05G02043-RA,AS03G01423-RA,AS05G01171-RA,AS01G03662-RA,AS05G03527-RA,AS01G00507-RA,AS03G02772-RA,AS04G01…	0.00129205090482355
38	BP	GO:0030001	metal ion transport	AS06G00379-RA,AS07G01198-RA,AS06G03011-RA,AS02G02608-RA,AS08G03804-RA,AS08G03846-RA,AS07G03489-RA,AS05G01659-RA,AS07G00212-RA,AS04G02962-RA,AS10G01934-RA,AS08G01392-RA,AS08G01809-RA,AS08G03445-RA,AS09G01065-RA,AS08G00585-RA,AS02G01503-RA,AS08G03133-RA,AS02G03048-RA,AS01G01240-RA,AS06G01506-RA,AS01G00687-RA,AS04G02228-RA,AS07G01124-RA,AS07G03532-RA,AS01G01339-RA,AS06G00878-RA,AS06G01420-RA,AS04G03…	0.00129205090482355
39	MF	GO:0016722	oxidoreductase activity, acting on metal ions	AS07G03431-RA,AS02G01011-RA,AS07G02486-RA,AS03G00113-RA,AS01G01384-RA,AS08G00008-RA,AS06G00548-RA,AS01G00523-RA,AS01G01557-RA,AS10G00664-RA,AS08G01875-RA,AS08G00226-RA,AS07G00843-RA,AS03G00337-RA,AS06G03130-RA,AS11G02480-RA,AS07G02428-RA,AS08G00174-RA,AS11G02368-RA,AS11G00920-RA,AS11G00901-RA	0.00169437148828237
40	BP	GO:0031668	cellular response to extracellular stimulus	AS05G00082-RA,AS03G00884-RA,AS07G01556-RA,AS02G00475-RA,AS08G02493-RA,AS09G02523-RA,AS05G01863-RA,AS04G03104-RA,AS02G01117-RA,AS03G02171-RA,AS08G03419-RA,AS05G01757-RA,AS02G00057-RA,AS04G02936-RA,AS09G02870-RA,AS05G02011-RA,AS07G02064-RA,AS05G00397-RA,AS04G02344-RA,AS08G00475-RA,AS08G01809-RA,AS11G00774-RA,AS09G01065-RA,AS10G01416-RA,AS03G02983-RA,AS03G02650-RA,AS06G00038-RA,AS08G01185-RA,AS09G01…	0.0018458038852853
41	BP	GO:0009630	gravitropism	AS07G01198-RA,AS02G01323-RA,AS05G02230-RA,AS10G00143-RA,AS06G00881-RA,AS04G02962-RA,AS07G03044-RA,AS01G01402-RA,AS07G01953-RA,AS03G02705-RA,AS07G00855-RA,AS06G01986-RA,AS07G01546-RA,AS11G01623-RA,AS07G01458-RA,AS06G03379-RA,AS11G00720-RA,AS02G03234-RA,AS01G00512-RA,AS05G03507-RA,AS06G00123-RA,AS08G03535-RA,AS07G03421-RA,AS04G02680-RA,AS11G02508-RA,AS03G02018-RA,AS06G01070-RA,AS08G02283-RA,AS04G00…	0.00193102316504845
42	BP	GO:0098660	inorganic ion transmembrane transport	AS08G03763-RA,AS06G00379-RA,AS07G01198-RA,AS08G02302-RA,AS07G00034-RA,AS06G03011-RA,AS06G02506-RA,AS02G02608-RA,AS08G03804-RA,AS02G00475-RA,AS08G03846-RA,AS01G03792-RA,AS06G03390-RA,AS06G01586-RA,AS05G01659-RA,AS07G00212-RA,AS09G01485-RA,AS04G02962-RA,AS10G01934-RA,AS08G01392-RA,AS01G03438-RA,AS08G03415-RA,AS07G00074-RA,AS08G03327-RA,AS11G01739-RA,AS09G02562-RA,AS07G02064-RA,AS03G00739-RA,AS09G01…	0.00200500014306994
43	BP	GO:0010540	basipetal auxin transport	AS07G01198-RA,AS02G01323-RA,AS04G03255-RA,AS01G00456-RA,AS02G03234-RA,AS04G02680-RA,AS06G01070-RA,AS08G02283-RA,AS10G00030-RA,AS01G03645-RA,AS11G02515-RA,AS06G02731-RA	0.00235323526579925
44	MF	GO:0046873	metal ion transmembrane transporter activity	AS06G00379-RA,AS07G01198-RA,AS06G03011-RA,AS02G02608-RA,AS08G03804-RA,AS08G03846-RA,AS07G00212-RA,AS04G02962-RA,AS10G01934-RA,AS08G01392-RA,AS09G01065-RA,AS02G01503-RA,AS08G03133-RA,AS01G01240-RA,AS06G01506-RA,AS01G00687-RA,AS04G02228-RA,AS07G01124-RA,AS01G01339-RA,AS06G00878-RA,AS04G03251-RA,AS02G03783-RA,AS08G02855-RA,AS02G01181-RA,AS05G00111-RA,AS04G02413-RA,AS04G03264-RA,AS11G00968-RA,AS06G00…	0.00342926076794998
45	BP	GO:0048878	chemical homeostasis	AS05G00082-RA,AS07G03399-RA,AS07G01198-RA,AS01G00665-RA,AS07G00034-RA,AS01G02059-RA,AS04G00055-RA,AS06G03011-RA,AS07G01556-RA,AS02G02608-RA,AS08G03804-RA,AS06G02689-RA,AS05G02230-RA,AS06G01586-RA,AS05G00555-RA,AS01G03086-RA,AS10G01934-RA,AS10G01481-RA,AS05G00633-RA,AS06G00463-RA,AS08G03327-RA,AS04G00608-RA,AS04G00804-RA,AS09G01370-RA,AS08G01809-RA,AS02G01385-RA,AS09G00215-RA,AS04G00842-RA,AS02G01…	0.0038641279890135
46	BP	GO:0016122	xanthophyll metabolic process	AS06G03005-RA,AS09G03024-RA,AS09G00215-RA,AS08G02992-RA,AS09G01056-RA,AS05G02258-RA,AS04G00671-RA,AS07G03164-RA,AS01G00678-RA,AS07G00114-RA,AS01G02116-RA,AS05G03716-RA,AS08G00239-RA,AS06G00626-RA	0.00401937621211213
47	BP	GO:0031667	response to nutrient levels	AS05G00082-RA,AS07G01556-RA,AS02G00475-RA,AS08G02493-RA,AS05G01863-RA,AS04G03104-RA,AS02G01117-RA,AS04G02686-RA,AS03G02171-RA,AS01G03155-RA,AS05G01757-RA,AS04G01774-RA,AS04G02936-RA,AS09G02870-RA,AS05G02011-RA,AS07G02064-RA,AS05G00397-RA,AS04G02344-RA,AS08G00475-RA,AS08G01809-RA,AS11G00774-RA,AS09G01065-RA,AS10G01416-RA,AS03G02983-RA,AS03G02650-RA,AS06G00038-RA,AS08G01185-RA,AS09G01882-RA,AS10G01…	0.00401937621211213
48	BP	GO:0071365	cellular response to auxin stimulus	AS02G00201-RA,AS01G00665-RA,AS01G02059-RA,AS02G01323-RA,AS05G02230-RA,AS03G02849-RA,AS10G00143-RA,AS04G00746-RA,AS03G01672-RA,AS01G03600-RA,AS02G03618-RA,AS06G02623-RA,AS06G02964-RA,AS05G00089-RA,AS05G01517-RA,AS03G01600-RA,AS11G01487-RA,AS03G02705-RA,AS07G03239-RA,AS05G01661-RA,AS01G00309-RA,AS11G01488-RA,AS09G00722-RA,AS05G00901-RA,AS09G00597-RA,AS04G02779-RA,AS09G00475-RA,AS05G03526-RA,AS04G01…	0.00437955906544218
49	BP	GO:0009734	auxin-activated signaling pathway	AS01G00665-RA,AS01G02059-RA,AS02G01323-RA,AS05G02230-RA,AS03G02849-RA,AS10G00143-RA,AS04G00746-RA,AS01G03600-RA,AS02G03618-RA,AS06G02623-RA,AS06G02964-RA,AS05G00089-RA,AS05G01517-RA,AS11G01487-RA,AS03G02705-RA,AS07G03239-RA,AS01G00309-RA,AS11G01488-RA,AS09G00722-RA,AS05G00901-RA,AS09G00597-RA,AS04G02779-RA,AS09G00475-RA,AS05G03526-RA,AS04G01922-RA,AS04G03120-RA,AS07G01458-RA,AS02G02233-RA,AS11G01…	0.00481986424809158
50	BP	GO:0009629	response to gravity	AS07G01198-RA,AS07G01597-RA,AS02G01323-RA,AS05G02230-RA,AS10G00143-RA,AS06G00881-RA,AS04G02962-RA,AS07G03044-RA,AS01G01402-RA,AS07G01953-RA,AS03G02705-RA,AS07G00855-RA,AS06G01986-RA,AS07G01546-RA,AS11G01623-RA,AS07G01458-RA,AS06G03379-RA,AS11G00720-RA,AS02G03234-RA,AS01G00512-RA,AS05G03507-RA,AS06G00123-RA,AS08G03535-RA,AS07G03421-RA,AS04G02680-RA,AS11G02508-RA,AS03G02018-RA,AS06G01070-RA,AS08G02…	0.0049625927793992
51	MF	GO:0015662	P-type ion transporter activity	AS06G03011-RA,AS06G02506-RA,AS07G00212-RA,AS09G01370-RA,AS02G03783-RA,AS08G02855-RA,AS05G00111-RA,AS11G00968-RA,AS06G00833-RA,AS06G02764-RA,AS01G01211-RA,AS07G01974-RA,AS02G02965-RA,AS03G02034-RA,AS03G02814-RA,AS07G03344-RA,AS04G00807-RA,AS02G03531-RA	0.00507785042835677
52	MF	GO:0140358	P-type transmembrane transporter activity	AS06G03011-RA,AS06G02506-RA,AS07G00212-RA,AS09G01370-RA,AS02G03783-RA,AS08G02855-RA,AS05G00111-RA,AS11G00968-RA,AS06G00833-RA,AS06G02764-RA,AS01G01211-RA,AS07G01974-RA,AS02G02965-RA,AS03G02034-RA,AS03G02814-RA,AS07G03344-RA,AS04G00807-RA,AS02G03531-RA	0.00507785042835677
53	BP	GO:0009611	response to wounding	AS02G00896-RA,AS07G03050-RA,AS09G02569-RA,AS03G01136-RA,AS03G01102-RA,AS09G01753-RA,AS03G02304-RA,AS06G02679-RA,AS10G00143-RA,AS04G02962-RA,AS08G02112-RA,AS05G01187-RA,AS02G01923-RA,AS04G02400-RA,AS01G03001-RA,AS08G01809-RA,AS07G00753-RA,AS01G03321-RA,AS04G00772-RA,AS04G03343-RA,AS05G03160-RA,AS04G00821-RA,AS03G03003-RA,AS09G00627-RA,AS03G00763-RA,AS04G02554-RA,AS04G03141-RA,AS03G01878-RA,AS08G02…	0.00565422026059113
54	BP	GO:0009739	response to gibberellin	AS07G03050-RA,AS08G00705-RA,AS04G02201-RA,AS02G00963-RA,AS06G02612-RA,AS01G01194-RA,AS04G00669-RA,AS08G00537-RA,AS04G00821-RA,AS06G02356-RA,AS11G02355-RA,AS07G03313-RA,AS01G00309-RA,AS09G01439-RA,AS07G01380-RA,AS05G01785-RA,AS05G00901-RA,AS07G03167-RA,AS04G00565-RA,AS04G01922-RA,AS07G02994-RA,AS07G01932-RA,AS01G00297-RA,AS08G01412-RA,AS09G01817-RA,AS05G00078-RA,AS01G01935-RA,AS01G00336-RA,AS05G01…	0.00565422026059113
55	BP	GO:0009832	plant-type cell wall biogenesis	AS11G01454-RA,AS04G02428-RA,AS07G02689-RA,AS10G00350-RA,AS02G01011-RA,AS01G01384-RA,AS11G01054-RA,AS04G02686-RA,AS08G00495-RA,AS05G01492-RA,AS08G02903-RA,AS01G00641-RA,AS02G01402-RA,AS08G02088-RA,AS01G03747-RA,AS06G02964-RA,AS06G03003-RA,AS05G02449-RA,AS08G01422-RA,AS01G01251-RA,AS07G03239-RA,AS05G01661-RA,AS09G01066-RA,AS05G03241-RA,AS07G02994-RA,AS08G00735-RA,AS02G01081-RA,AS05G02391-RA,AS01G03…	0.00565422026059113
56	MF	GO:0015085	calcium ion transmembrane transporter activity	AS06G03011-RA,AS07G00212-RA,AS04G02962-RA,AS06G01506-RA,AS01G00687-RA,AS02G03783-RA,AS08G02855-RA,AS02G01181-RA,AS05G00111-RA,AS04G02413-RA,AS11G00968-RA,AS06G00833-RA,AS06G03379-RA,AS06G03056-RA,AS06G02764-RA,AS01G01211-RA,AS04G02403-RA,AS07G01974-RA,AS02G02965-RA,AS03G02034-RA,AS11G02699-RA,AS01G01430-RA,AS03G02814-RA,AS04G01129-RA,AS04G00807-RA,AS07G02643-RA,AS02G03531-RA	0.00565422026059113
57	BP	GO:0009733	response to auxin	AS07G03050-RA,AS10G00144-RA,AS02G00201-RA,AS01G00665-RA,AS01G02059-RA,AS11G01447-RA,AS09G03010-RA,AS02G01323-RA,AS05G02230-RA,AS02G02478-RA,AS05G01863-RA,AS03G02849-RA,AS10G00143-RA,AS06G00881-RA,AS01G01823-RA,AS04G00746-RA,AS02G03098-RA,AS09G03024-RA,AS03G01672-RA,AS06G02943-RA,AS04G00218-RA,AS04G03049-RA,AS01G02945-RA,AS02G00319-RA,AS01G03600-RA,AS02G03618-RA,AS04G00842-RA,AS06G02623-RA,AS09G01…	0.00661677752694365
58	BP	GO:0009636	response to toxic substance	AS07G03050-RA,AS11G01071-RA,AS10G01519-RA,AS05G01863-RA,AS04G03104-RA,AS09G02424-RA,AS02G02607-RA,AS09G01145-RA,AS11G00990-RA,AS06G02919-RA,AS02G03214-RA,AS07G03237-RA,AS03G02878-RA,AS05G00440-RA,AS05G03275-RA,AS06G03589-RA,AS06G03712-RA,AS04G00580-RA,AS05G03596-RA,AS04G00821-RA,AS02G03786-RA,AS11G02355-RA,AS01G00002-RA,AS05G03307-RA,AS05G01319-RA,AS06G00066-RA,AS01G00035-RA,AS01G00427-RA,AS01G00…	0.00749591992724312
59	BP	GO:0015711	organic anion transport	AS02G00896-RA,AS05G00133-RA,AS07G00237-RA,AS06G02534-RA,AS10G01481-RA,AS08G02112-RA,AS10G00735-RA,AS08G00162-RA,AS08G00850-RA,AS07G02713-RA,AS01G01402-RA,AS04G01662-RA,AS04G03179-RA,AS08G03445-RA,AS01G01288-RA,AS06G01003-RA,AS09G01065-RA,AS11G01912-RA,AS10G01511-RA,AS04G02749-RA,AS11G00783-RA,AS03G01046-RA,AS07G02107-RA,AS06G02697-RA,AS09G00627-RA,AS07G00855-RA,AS03G01776-RA,AS07G03532-RA,AS06G02…	0.00749591992724312
60	BP	GO:0016036	cellular response to phosphate starvation	AS07G01556-RA,AS08G02493-RA,AS05G01863-RA,AS05G01757-RA,AS05G02011-RA,AS07G02064-RA,AS04G02344-RA,AS11G00774-RA,AS09G01065-RA,AS03G02650-RA,AS08G01185-RA,AS07G01340-RA,AS05G03375-RA,AS05G02761-RA,AS09G01728-RA,AS10G02893-RA,AS10G00664-RA,AS06G00833-RA,AS07G03607-RA,AS10G00752-RA,AS05G00137-RA,AS01G02116-RA,AS10G00870-RA,AS08G01016-RA,AS09G02404-RA,AS08G00428-RA,AS10G00111-RA,AS08G03386-RA,AS06G01…	0.00749591992724312
61	BP	GO:0071496	cellular response to external stimulus	AS05G00082-RA,AS03G00884-RA,AS07G01556-RA,AS02G00475-RA,AS08G02493-RA,AS09G02523-RA,AS05G01863-RA,AS04G03104-RA,AS02G01117-RA,AS03G02171-RA,AS08G03419-RA,AS05G01757-RA,AS02G00057-RA,AS04G02936-RA,AS09G02870-RA,AS05G02011-RA,AS07G02064-RA,AS05G00397-RA,AS04G02344-RA,AS08G00475-RA,AS08G01809-RA,AS11G00774-RA,AS09G01065-RA,AS10G01416-RA,AS03G02983-RA,AS03G02650-RA,AS06G00038-RA,AS08G01185-RA,AS09G01…	0.00831742562150908
62	MF	GO:0016709	oxidoreductase activity, acting on paired donors, with incorporation or reduction of molecular oxygen, NAD(P)H as one donor, and incorporation of one atom of oxygen	AS09G00870-RA,AS08G02096-RA,AS01G03046-RA,AS01G03184-RA,AS09G00215-RA,AS02G01497-RA,AS01G03823-RA,AS04G01453-RA,AS11G02648-RA,AS09G00047-RA,AS01G03077-RA,AS03G00837-RA,AS09G00043-RA,AS05G00196-RA,AS01G00297-RA,AS04G03292-RA,AS08G01482-RA,AS01G00678-RA,AS01G02076-RA,AS03G00648-RA,AS02G01008-RA,AS08G03515-RA,AS07G01564-RA,AS05G02644-RA,AS03G00649-RA,AS08G03466-RA,AS04G00953-RA,AS06G01384-RA,AS01G03…	0.00833274869571168
63	BP	GO:0009641	shade avoidance	AS05G00082-RA,AS01G03823-RA,AS05G01147-RA,AS01G03077-RA,AS03G00837-RA,AS02G01316-RA,AS04G03629-RA,AS02G01008-RA,AS04G01536-RA,AS08G00214-RA,AS05G02742-RA,AS01G03331-RA,AS01G03824-RA,AS11G00183-RA,AS10G02835-RA,AS09G00207-RA,AS05G02744-RA,AS03G00911-RA,AS09G01734-RA,AS03G00620-RA,AS03G00669-RA	0.00856300669799278
64	BP	GO:0050801	ion homeostasis	AS05G00082-RA,AS07G03399-RA,AS07G01198-RA,AS07G00034-RA,AS06G03011-RA,AS02G02608-RA,AS08G03804-RA,AS06G02689-RA,AS01G03086-RA,AS10G01934-RA,AS10G01481-RA,AS05G00633-RA,AS08G03327-RA,AS04G00804-RA,AS09G01370-RA,AS08G01809-RA,AS02G01385-RA,AS04G02501-RA,AS09G01065-RA,AS06G03589-RA,AS02G01503-RA,AS07G00701-RA,AS08G01185-RA,AS05G02748-RA,AS05G02191-RA,AS02G00646-RA,AS11G00422-RA,AS01G00231-RA,AS07G01…	0.00973777756920917
65	BP	GO:0042538	hyperosmotic salinity response	AS05G03672-RA,AS07G02560-RA,AS07G00865-RA,AS10G02131-RA,AS01G00456-RA,AS01G03321-RA,AS03G01878-RA,AS02G01478-RA,AS05G01785-RA,AS03G00402-RA,AS05G02988-RA,AS02G01059-RA,AS01G01182-RA,AS01G00651-RA,AS02G02274-RA,AS01G02675-RA,AS10G01807-RA,AS01G00044-RA,AS01G03645-RA,AS10G00413-RA,AS10G02031-RA,AS01G01847-RA,AS02G03761-RA	0.00989623585942309
66	BP	GO:0009251	glucan catabolic process	AS07G02652-RA,AS03G01682-RA,AS01G01002-RA,AS01G00561-RA,AS05G01042-RA,AS03G01787-RA,AS04G03294-RA,AS05G02342-RA,AS06G01146-RA,AS10G01060-RA,AS08G02713-RA,AS04G03389-RA,AS11G02462-RA,AS07G00314-RA,AS05G00877-RA,AS08G00870-RA,AS02G00839-RA	0.00996337696678697
67	BP	GO:0019725	cellular homeostasis	AS05G00082-RA,AS07G03399-RA,AS07G00034-RA,AS04G00055-RA,AS02G02608-RA,AS08G03804-RA,AS06G02689-RA,AS07G02988-RA,AS01G03086-RA,AS10G01934-RA,AS10G01481-RA,AS05G00633-RA,AS08G03327-RA,AS07G03237-RA,AS09G01370-RA,AS01G00782-RA,AS02G01385-RA,AS05G00440-RA,AS04G02501-RA,AS05G03275-RA,AS09G01065-RA,AS06G03589-RA,AS08G02427-RA,AS05G02748-RA,AS05G02191-RA,AS02G00646-RA,AS11G00422-RA,AS01G00231-RA,AS06G00…	0.00996337696678697
68	BP	GO:0031669	cellular response to nutrient levels	AS05G00082-RA,AS07G01556-RA,AS02G00475-RA,AS08G02493-RA,AS05G01863-RA,AS04G03104-RA,AS02G01117-RA,AS03G02171-RA,AS05G01757-RA,AS04G02936-RA,AS09G02870-RA,AS05G02011-RA,AS07G02064-RA,AS05G00397-RA,AS04G02344-RA,AS08G00475-RA,AS08G01809-RA,AS11G00774-RA,AS09G01065-RA,AS10G01416-RA,AS03G02983-RA,AS03G02650-RA,AS06G00038-RA,AS08G01185-RA,AS09G01882-RA,AS10G01414-RA,AS05G02931-RA,AS07G01340-RA,AS05G03…	0.00996337696678697
69	BP	GO:0043090	amino acid import	AS05G00133-RA,AS09G00475-RA,AS03G00499-RA,AS03G00501-RA,AS05G03476-RA,AS05G01171-RA,AS01G03662-RA,AS05G03527-RA,AS01G00507-RA	0.0105253031184846
70	BP	GO:0042594	response to starvation	AS07G01556-RA,AS02G00475-RA,AS08G02493-RA,AS05G01863-RA,AS04G03104-RA,AS02G01117-RA,AS04G02686-RA,AS03G02171-RA,AS01G03155-RA,AS05G01757-RA,AS04G02936-RA,AS09G02870-RA,AS05G02011-RA,AS07G02064-RA,AS05G00397-RA,AS04G02344-RA,AS08G01809-RA,AS11G00774-RA,AS09G01065-RA,AS03G02983-RA,AS03G02650-RA,AS06G00038-RA,AS08G01185-RA,AS09G01882-RA,AS05G02931-RA,AS07G01340-RA,AS05G03375-RA,AS07G01478-RA,AS05G02…	0.010666598349572
71	CC	GO:0000325	plant-type vacuole	AS07G01198-RA,AS11G00636-RA,AS07G00034-RA,AS06G03011-RA,AS06G02506-RA,AS08G02948-RA,AS01G03792-RA,AS03G02304-RA,AS06G03390-RA,AS06G01586-RA,AS08G00705-RA,AS01G03255-RA,AS07G01519-RA,AS07G02148-RA,AS08G01316-RA,AS04G00151-RA,AS03G00739-RA,AS04G02056-RA,AS05G02786-RA,AS06G02964-RA,AS06G00218-RA,AS08G02559-RA,AS04G02749-RA,AS02G03048-RA,AS01G00687-RA,AS05G02748-RA,AS02G00646-RA,AS09G01556-RA,AS08G00…	0.0126945403257508
72	BP	GO:0055076	transition metal ion homeostasis	AS07G01198-RA,AS08G03804-RA,AS06G02689-RA,AS10G01934-RA,AS04G00804-RA,AS02G01385-RA,AS04G02501-RA,AS09G01065-RA,AS07G00701-RA,AS05G02748-RA,AS01G00231-RA,AS06G01420-RA,AS08G01875-RA,AS08G00226-RA,AS06G00990-RA,AS02G00164-RA,AS07G00898-RA,AS06G02324-RA,AS06G01598-RA,AS08G02944-RA,AS03G02861-RA,AS07G00118-RA,AS02G01004-RA,AS08G02717-RA,AS10G00030-RA,AS01G02121-RA,AS10G02376-RA,AS06G00996-RA,AS07G02…	0.0133318852687292
73	BP	GO:0006979	response to oxidative stress	AS05G00082-RA,AS03G00197-RA,AS07G03050-RA,AS04G02198-RA,AS11G01588-RA,AS05G01267-RA,AS09G01753-RA,AS11G01071-RA,AS10G02934-RA,AS05G01863-RA,AS04G03104-RA,AS07G00313-RA,AS08G01028-RA,AS10G01934-RA,AS02G02607-RA,AS04G02936-RA,AS09G01145-RA,AS05G01187-RA,AS02G01923-RA,AS07G00865-RA,AS05G02405-RA,AS11G00990-RA,AS02G03214-RA,AS07G03237-RA,AS03G02878-RA,AS05G03753-RA,AS05G00440-RA,AS05G03275-RA,AS09G01…	0.0141257210100416
74	MF	GO:0005388	P-type calcium transporter activity	AS06G03011-RA,AS07G00212-RA,AS02G03783-RA,AS08G02855-RA,AS05G00111-RA,AS11G00968-RA,AS06G00833-RA,AS06G02764-RA,AS01G01211-RA,AS07G01974-RA,AS02G02965-RA,AS03G02034-RA,AS03G02814-RA,AS04G00807-RA,AS02G03531-RA	0.0142295244859067
75	MF	GO:0015562	efflux transmembrane transporter activity	AS01G02059-RA,AS02G01323-RA,AS05G02230-RA,AS03G02705-RA,AS02G00644-RA,AS09G00475-RA,AS07G01458-RA,AS10G02336-RA,AS02G03234-RA,AS08G02283-RA,AS05G01171-RA,AS05G03527-RA,AS11G02515-RA,AS06G02731-RA,AS01G01231-RA	0.0142295244859067
76	BP	GO:0000302	response to reactive oxygen species	AS05G00082-RA,AS07G03050-RA,AS11G01588-RA,AS05G01267-RA,AS11G01071-RA,AS05G01863-RA,AS04G03104-RA,AS10G01934-RA,AS02G02607-RA,AS09G01145-RA,AS05G01187-RA,AS11G00990-RA,AS02G03214-RA,AS03G02878-RA,AS09G01065-RA,AS10G01416-RA,AS06G03712-RA,AS01G03321-RA,AS05G03596-RA,AS04G00821-RA,AS01G00002-RA,AS07G02060-RA,AS05G01319-RA,AS07G03532-RA,AS01G00427-RA,AS01G00426-RA,AS07G01478-RA,AS05G00750-RA,AS04G02…	0.0146179327666905
77	MF	GO:0008324	cation transmembrane transporter activity	AS06G00379-RA,AS07G01198-RA,AS07G00034-RA,AS06G03011-RA,AS06G02506-RA,AS05G00133-RA,AS02G02608-RA,AS08G03804-RA,AS02G00475-RA,AS08G03846-RA,AS01G03792-RA,AS06G03390-RA,AS06G01586-RA,AS07G00212-RA,AS04G02962-RA,AS10G01934-RA,AS08G01392-RA,AS01G03438-RA,AS08G03415-RA,AS07G00074-RA,AS08G03327-RA,AS09G02562-RA,AS03G00739-RA,AS09G01370-RA,AS05G02786-RA,AS09G01065-RA,AS11G01912-RA,AS08G02559-RA,AS02G01…	0.0146179327666905
78	BP	GO:0009267	cellular response to starvation	AS07G01556-RA,AS02G00475-RA,AS08G02493-RA,AS05G01863-RA,AS04G03104-RA,AS02G01117-RA,AS03G02171-RA,AS05G01757-RA,AS04G02936-RA,AS09G02870-RA,AS05G02011-RA,AS07G02064-RA,AS05G00397-RA,AS04G02344-RA,AS08G01809-RA,AS11G00774-RA,AS09G01065-RA,AS03G02983-RA,AS03G02650-RA,AS06G00038-RA,AS08G01185-RA,AS09G01882-RA,AS05G02931-RA,AS07G01340-RA,AS05G03375-RA,AS07G01478-RA,AS05G02761-RA,AS09G01728-RA,AS10G02…	0.0146179327666905
79	BP	GO:0048584	positive regulation of response to stimulus	AS05G00082-RA,AS04G00055-RA,AS03G02955-RA,AS03G02849-RA,AS07G02423-RA,AS08G00495-RA,AS05G01659-RA,AS10G00371-RA,AS04G02962-RA,AS06G03592-RA,AS10G01045-RA,AS02G01168-RA,AS07G00934-RA,AS10G01718-RA,AS02G00963-RA,AS09G02870-RA,AS04G01390-RA,AS11G01077-RA,AS05G02019-RA,AS02G00384-RA,AS04G02400-RA,AS09G01926-RA,AS02G00247-RA,AS08G00744-RA,AS07G01684-RA,AS08G00754-RA,AS02G03765-RA,AS05G03728-RA,AS07G03…	0.0146179327666905
80	BP	GO:0048646	anatomical structure formation involved in morphogenesis	AS06G02271-RA,AS05G02230-RA,AS01G03797-RA,AS07G02423-RA,AS04G02686-RA,AS04G00172-RA,AS06G00881-RA,AS05G02371-RA,AS01G03406-RA,AS09G03024-RA,AS01G00482-RA,AS06G00080-RA,AS01G01334-RA,AS08G03415-RA,AS01G01402-RA,AS02G01929-RA,AS11G01077-RA,AS02G00384-RA,AS07G03619-RA,AS02G00905-RA,AS01G03593-RA,AS05G01923-RA,AS04G02873-RA,AS11G01188-RA,AS02G01462-RA,AS04G00772-RA,AS05G03728-RA,AS10G02852-RA,AS03G02…	0.0152460541697405
81	BP	GO:0015698	inorganic anion transport	AS07G01556-RA,AS04G02686-RA,AS09G01485-RA,AS05G00633-RA,AS11G01739-RA,AS07G02064-RA,AS05G00397-RA,AS03G01977-RA,AS04G00065-RA,AS02G01503-RA,AS03G02650-RA,AS08G01185-RA,AS10G01414-RA,AS09G01556-RA,AS08G00702-RA,AS09G03031-RA,AS02G00644-RA,AS04G00431-RA,AS02G02980-RA,AS08G00395-RA,AS02G00255-RA,AS10G00752-RA,AS06G02643-RA,AS09G03061-RA,AS07G01972-RA,AS06G00321-RA,AS06G02141-RA,AS03G03022-RA,AS07G00…	0.0156733418752893
82	BP	GO:1901657	glycosyl compound metabolic process	AS03G02884-RA,AS04G02266-RA,AS01G03357-RA,AS06G02568-RA,AS01G03155-RA,AS07G03538-RA,AS08G02112-RA,AS03G01841-RA,AS02G03618-RA,AS05G03750-RA,AS08G00200-RA,AS06G01280-RA,AS02G02928-RA,AS08G00537-RA,AS01G01881-RA,AS01G03823-RA,AS04G02270-RA,AS02G02087-RA,AS07G01380-RA,AS01G03077-RA,AS04G02094-RA,AS08G02080-RA,AS07G03079-RA,AS03G00837-RA,AS05G00196-RA,AS05G02938-RA,AS04G02269-RA,AS04G00781-RA,AS10G00…	0.0157657312043855
83	MF	GO:0022853	active ion transmembrane transporter activity	AS07G01198-RA,AS07G00034-RA,AS06G03011-RA,AS06G02506-RA,AS02G02608-RA,AS01G03792-RA,AS06G03390-RA,AS06G01586-RA,AS07G00212-RA,AS01G03438-RA,AS08G03415-RA,AS07G00074-RA,AS08G03327-RA,AS07G02713-RA,AS09G02562-RA,AS09G01370-RA,AS05G02786-RA,AS08G02559-RA,AS02G01503-RA,AS02G03048-RA,AS10G01414-RA,AS05G02748-RA,AS02G00646-RA,AS09G01556-RA,AS02G00644-RA,AS03G00780-RA,AS04G00337-RA,AS04G03251-RA,AS04G00…	0.0167515950246835
84	BP	GO:0010089	xylem development	AS02G00201-RA,AS10G00350-RA,AS05G02371-RA,AS02G00687-RA,AS02G03541-RA,AS01G00482-RA,AS03G02131-RA,AS02G01402-RA,AS08G02088-RA,AS05G01661-RA,AS01G03414-RA,AS08G01987-RA,AS08G00735-RA,AS05G02391-RA,AS01G03423-RA,AS06G00017-RA,AS06G03499-RA,AS01G01966-RA,AS01G00047-RA,AS05G00657-RA,AS01G01903-RA,AS01G01272-RA,AS11G00148-RA,AS06G03670-RA	0.0175733882342302
85	MF	GO:0015144	carbohydrate transmembrane transporter activity	AS01G03792-RA,AS06G03390-RA,AS06G01586-RA,AS07G03489-RA,AS08G01555-RA,AS01G03438-RA,AS08G03415-RA,AS09G02562-RA,AS04G03179-RA,AS05G02786-RA,AS04G03389-RA,AS11G00783-RA,AS02G03048-RA,AS03G01046-RA,AS07G02107-RA,AS03G00780-RA,AS10G02926-RA,AS04G00337-RA,AS07G01416-RA,AS08G01775-RA,AS07G01939-RA,AS07G01892-RA,AS06G02168-RA,AS04G00236-RA,AS01G00486-RA,AS04G00243-RA,AS06G02165-RA,AS08G00239-RA,AS10G00…	0.0175733882342302
86	BP	GO:0034219	carbohydrate transmembrane transport	AS01G03792-RA,AS06G03390-RA,AS06G01586-RA,AS07G03489-RA,AS08G01555-RA,AS01G03438-RA,AS08G03415-RA,AS09G02562-RA,AS04G03179-RA,AS05G02786-RA,AS04G03389-RA,AS11G00783-RA,AS02G03048-RA,AS03G01046-RA,AS07G02107-RA,AS03G00780-RA,AS10G02926-RA,AS04G00337-RA,AS07G01416-RA,AS08G01775-RA,AS07G01939-RA,AS07G01892-RA,AS06G02168-RA,AS04G00236-RA,AS01G00486-RA,AS04G00243-RA,AS06G02165-RA,AS08G00239-RA,AS10G00…	0.0175733882342302
87	CC	GO:0000786	nucleosome	AS08G02856-RA,AS03G00483-RA,AS01G03667-RA,AS05G02491-RA,AS02G00588-RA,AS01G01174-RA,AS07G02472-RA,AS01G01212-RA,AS03G00491-RA,AS09G02135-RA,AS02G00599-RA,AS05G03461-RA	0.0180568932300381
88	BP	GO:0008643	carbohydrate transport	AS05G01842-RA,AS01G03792-RA,AS06G03390-RA,AS06G01586-RA,AS07G03489-RA,AS08G01555-RA,AS01G03438-RA,AS08G03415-RA,AS09G02562-RA,AS04G03179-RA,AS05G02786-RA,AS04G03389-RA,AS11G00783-RA,AS02G03048-RA,AS03G01046-RA,AS07G02107-RA,AS03G00780-RA,AS10G02926-RA,AS04G00337-RA,AS07G01416-RA,AS08G01775-RA,AS07G01939-RA,AS07G01892-RA,AS06G02168-RA,AS04G00236-RA,AS01G00486-RA,AS04G00243-RA,AS06G02165-RA,AS08G00…	0.0185291694799198
89	BP	GO:0008272	sulfate transport	AS07G01556-RA,AS11G01739-RA,AS05G00397-RA,AS03G02650-RA,AS02G02980-RA,AS07G01972-RA,AS07G00770-RA,AS04G02851-RA,AS03G02702-RA	0.018771985525653
90	MF	GO:0001067	transcription regulatory region nucleic acid binding	AS10G00144-RA,AS05G01955-RA,AS01G03357-RA,AS07G01461-RA,AS09G02523-RA,AS02G02478-RA,AS08G00495-RA,AS10G00386-RA,AS02G00687-RA,AS04G01893-RA,AS02G03288-RA,AS09G00193-RA,AS08G01109-RA,AS10G01645-RA,AS05G02209-RA,AS06G02943-RA,AS04G00218-RA,AS04G03049-RA,AS05G00397-RA,AS02G01604-RA,AS07G00650-RA,AS07G03188-RA,AS07G02566-RA,AS01G02000-RA,AS01G01194-RA,AS05G01923-RA,AS02G01912-RA,AS05G03748-RA,AS02G03…	0.0193842841605499
91	BP	GO:0006873	cellular ion homeostasis	AS05G00082-RA,AS07G03399-RA,AS07G00034-RA,AS02G02608-RA,AS08G03804-RA,AS06G02689-RA,AS01G03086-RA,AS10G01934-RA,AS10G01481-RA,AS05G00633-RA,AS08G03327-RA,AS09G01370-RA,AS02G01385-RA,AS04G02501-RA,AS09G01065-RA,AS06G03589-RA,AS05G02748-RA,AS05G02191-RA,AS02G00646-RA,AS11G00422-RA,AS01G00231-RA,AS06G01420-RA,AS04G03251-RA,AS11G01276-RA,AS02G01181-RA,AS07G01831-RA,AS06G00833-RA,AS06G00990-RA,AS02G00…	0.019590966050653
92	BP	GO:1900055	regulation of leaf senescence	AS10G00143-RA,AS05G00032-RA,AS06G02623-RA,AS10G02583-RA,AS08G01952-RA,AS08G02223-RA,AS06G02320-RA,AS06G00024-RA,AS05G02988-RA,AS07G02624-RA,AS05G00379-RA,AS08G01893-RA,AS03G02018-RA,AS04G01097-RA,AS01G00028-RA,AS03G02942-RA,AS05G00256-RA,AS01G01847-RA,AS01G00059-RA	0.0203790007154636
93	BP	GO:0048527	lateral root development	AS05G00082-RA,AS10G00143-RA,AS04G02686-RA,AS06G00881-RA,AS01G03086-RA,AS08G03841-RA,AS08G03415-RA,AS01G01402-RA,AS02G01929-RA,AS11G01487-RA,AS11G00690-RA,AS03G02140-RA,AS07G00855-RA,AS09G01439-RA,AS11G01488-RA,AS08G01987-RA,AS03G02776-RA,AS09G00722-RA,AS02G02941-RA,AS04G02779-RA,AS11G02192-RA,AS06G00826-RA,AS07G02624-RA,AS04G03629-RA,AS05G03507-RA,AS07G03421-RA,AS06G00321-RA,AS08G01831-RA,AS03G02…	0.0218998512562362
94	BP	GO:0009642	response to light intensity	AS05G00082-RA,AS11G01588-RA,AS11G01071-RA,AS08G02714-RA,AS05G01863-RA,AS06G01619-RA,AS02G02607-RA,AS04G02936-RA,AS09G01084-RA,AS02G03214-RA,AS04G02056-RA,AS06G03712-RA,AS06G00218-RA,AS06G00038-RA,AS10G02689-RA,AS03G01046-RA,AS01G00427-RA,AS01G00426-RA,AS04G02487-RA,AS02G01059-RA,AS02G00882-RA,AS06G02080-RA,AS05G01756-RA,AS09G00773-RA,AS04G02876-RA,AS11G02119-RA,AS09G02959-RA,AS08G03536-RA,AS01G01…	0.0219438377982981
95	CC	GO:0031225	anchored component of membrane	AS10G01486-RA,AS07G02689-RA,AS04G00009-RA,AS01G02148-RA,AS02G02346-RA,AS01G01292-RA,AS05G00389-RA,AS08G02903-RA,AS02G02347-RA,AS04G03663-RA,AS01G00938-RA,AS05G01265-RA,AS09G00741-RA,AS06G00548-RA,AS02G00135-RA,AS10G01587-RA,AS09G01882-RA,AS02G00172-RA,AS11G01568-RA,AS01G01557-RA,AS01G01251-RA,AS09G02131-RA,AS06G01937-RA,AS05G00991-RA,AS01G00091-RA,AS06G03453-RA,AS04G03498-RA,AS05G01780-RA,AS04G02…	0.0219438377982981
96	BP	GO:0009698	phenylpropanoid metabolic process	AS05G01212-RA,AS02G01011-RA,AS03G00113-RA,AS01G01384-RA,AS04G02686-RA,AS09G00193-RA,AS01G03593-RA,AS10G00243-RA,AS01G02476-RA,AS06G03766-RA,AS09G00633-RA,AS01G01031-RA,AS04G00573-RA,AS09G00734-RA,AS02G01316-RA,AS06G02552-RA,AS07G03546-RA,AS06G03499-RA,AS08G00466-RA,AS05G00277-RA,AS06G01981-RA,AS05G01554-RA,AS03G02023-RA,AS06G00321-RA,AS08G03396-RA,AS06G01386-RA,AS07G00843-RA,AS01G03615-RA,AS01G01…	0.0226679116412423
97	BP	GO:0009753	response to jasmonic acid	AS02G02678-RA,AS02G00896-RA,AS03G00197-RA,AS07G03050-RA,AS03G01102-RA,AS09G01753-RA,AS10G00143-RA,AS06G01152-RA,AS04G02962-RA,AS08G02112-RA,AS04G00608-RA,AS09G02370-RA,AS01G01194-RA,AS08G00595-RA,AS04G03343-RA,AS04G00821-RA,AS05G03728-RA,AS10G00442-RA,AS03G03003-RA,AS06G00697-RA,AS08G01222-RA,AS04G02554-RA,AS01G00309-RA,AS07G03532-RA,AS03G01878-RA,AS02G01478-RA,AS05G01785-RA,AS08G00834-RA,AS05G00…	0.0226679116412423
98	BP	GO:0098661	inorganic anion transmembrane transport	AS09G01485-RA,AS11G01739-RA,AS07G02064-RA,AS08G01185-RA,AS10G01414-RA,AS09G01556-RA,AS02G00644-RA,AS02G02980-RA,AS02G00255-RA,AS07G01972-RA,AS03G03022-RA,AS07G00770-RA,AS08G03097-RA,AS02G00266-RA,AS10G00111-RA,AS03G02702-RA,AS01G01231-RA	0.0228504616601834
99	BP	GO:0098662	inorganic cation transmembrane transport	AS08G03763-RA,AS06G00379-RA,AS07G01198-RA,AS08G02302-RA,AS07G00034-RA,AS06G03011-RA,AS06G02506-RA,AS02G02608-RA,AS08G03804-RA,AS02G00475-RA,AS08G03846-RA,AS01G03792-RA,AS06G03390-RA,AS06G01586-RA,AS05G01659-RA,AS07G00212-RA,AS04G02962-RA,AS10G01934-RA,AS08G01392-RA,AS01G03438-RA,AS08G03415-RA,AS07G00074-RA,AS08G03327-RA,AS09G02562-RA,AS03G00739-RA,AS09G01370-RA,AS05G02786-RA,AS10G02794-RA,AS02G01…	0.0234586398795711
100	BP	GO:0005983	starch catabolic process	AS03G01682-RA,AS01G01002-RA,AS01G00561-RA,AS05G01042-RA,AS03G01787-RA,AS04G03294-RA,AS05G02342-RA,AS10G01060-RA,AS04G03389-RA,AS07G00314-RA,AS08G00870-RA	0.0248474809722857
101	BP	GO:0000272	polysaccharide catabolic process	AS07G02652-RA,AS03G01682-RA,AS01G01002-RA,AS11G01636-RA,AS01G00561-RA,AS05G01042-RA,AS03G01787-RA,AS04G03294-RA,AS05G02342-RA,AS06G01146-RA,AS06G02919-RA,AS10G01060-RA,AS08G02713-RA,AS04G03389-RA,AS04G00580-RA,AS05G03601-RA,AS08G00521-RA,AS04G00573-RA,AS10G02677-RA,AS11G02462-RA,AS07G00314-RA,AS03G00672-RA,AS05G00877-RA,AS08G00870-RA,AS02G00839-RA,AS07G01824-RA	0.025242100600919
102	BP	GO:0050832	defense response to fungus	AS11G01454-RA,AS01G03357-RA,AS05G01863-RA,AS05G00026-RA,AS04G02962-RA,AS07G02683-RA,AS01G03086-RA,AS04G02400-RA,AS03G00035-RA,AS06G00571-RA,AS11G01194-RA,AS08G00257-RA,AS06G00697-RA,AS03G00048-RA,AS04G02130-RA,AS05G01661-RA,AS05G03307-RA,AS09G01066-RA,AS01G00309-RA,AS01G03444-RA,AS01G00035-RA,AS02G01765-RA,AS05G00901-RA,AS06G02396-RA,AS08G02080-RA,AS06G01755-RA,AS05G01715-RA,AS07G02637-RA,AS08G01…	0.0253118283869556
103	MF	GO:0016702	oxidoreductase activity, acting on single donors with incorporation of molecular oxygen, incorporation of two atoms of oxygen	AS06G03005-RA,AS09G03024-RA,AS02G00021-RA,AS10G02852-RA,AS03G02140-RA,AS09G01056-RA,AS08G00291-RA,AS10G02326-RA,AS09G02128-RA,AS02G02524-RA,AS07G03649-RA,AS10G02325-RA	0.0255610637005248
104	BP	GO:0070542	response to fatty acid	AS02G02678-RA,AS02G00896-RA,AS03G00197-RA,AS07G03050-RA,AS03G01102-RA,AS09G01753-RA,AS10G00143-RA,AS06G01152-RA,AS04G02962-RA,AS08G02112-RA,AS04G00608-RA,AS09G02370-RA,AS01G01194-RA,AS08G00595-RA,AS04G03343-RA,AS04G00821-RA,AS05G03728-RA,AS10G00442-RA,AS03G03003-RA,AS06G00697-RA,AS08G01222-RA,AS04G02554-RA,AS01G00309-RA,AS07G03532-RA,AS03G01878-RA,AS02G01478-RA,AS05G01785-RA,AS08G00834-RA,AS05G00…	0.0255610637005248
105	BP	GO:0044403	biological process involved in symbiotic interaction	AS01G01753-RA,AS08G01635-RA,AS07G02078-RA,AS01G03406-RA,AS07G01519-RA,AS07G02148-RA,AS01G02770-RA,AS11G00774-RA,AS05G02655-RA,AS07G01776-RA,AS06G00571-RA,AS09G01882-RA,AS08G00257-RA,AS10G00837-RA,AS03G02939-RA,AS01G00035-RA,AS06G03434-RA,AS06G00575-RA,AS05G02911-RA,AS09G01406-RA,AS02G01201-RA,AS09G02835-RA,AS04G02068-RA,AS11G00031-RA,AS11G01476-RA,AS09G02921-RA,AS04G03454-RA,AS07G03359-RA,AS04G02…	0.0263332961147486
106	BP	GO:0098771	inorganic ion homeostasis	AS05G00082-RA,AS07G03399-RA,AS07G01198-RA,AS07G00034-RA,AS02G02608-RA,AS08G03804-RA,AS06G02689-RA,AS01G03086-RA,AS10G01934-RA,AS10G01481-RA,AS08G03327-RA,AS04G00804-RA,AS09G01370-RA,AS08G01809-RA,AS02G01385-RA,AS04G02501-RA,AS09G01065-RA,AS06G03589-RA,AS02G01503-RA,AS07G00701-RA,AS08G01185-RA,AS05G02748-RA,AS05G02191-RA,AS02G00646-RA,AS11G00422-RA,AS01G00231-RA,AS07G01340-RA,AS06G01420-RA,AS04G03…	0.0263332961147486
107	MF	GO:0022890	inorganic cation transmembrane transporter activity	AS06G00379-RA,AS07G01198-RA,AS07G00034-RA,AS06G03011-RA,AS06G02506-RA,AS02G02608-RA,AS08G03804-RA,AS02G00475-RA,AS08G03846-RA,AS01G03792-RA,AS06G03390-RA,AS06G01586-RA,AS07G00212-RA,AS04G02962-RA,AS10G01934-RA,AS08G01392-RA,AS01G03438-RA,AS08G03415-RA,AS07G00074-RA,AS08G03327-RA,AS09G02562-RA,AS03G00739-RA,AS09G01370-RA,AS05G02786-RA,AS09G01065-RA,AS08G02559-RA,AS02G01503-RA,AS08G03133-RA,AS02G03…	0.028347744667659
108	MF	GO:0051213	dioxygenase activity	AS06G03005-RA,AS09G03024-RA,AS02G00021-RA,AS01G03184-RA,AS06G02612-RA,AS06G01691-RA,AS02G03364-RA,AS08G01417-RA,AS10G02852-RA,AS03G02140-RA,AS05G02907-RA,AS02G03209-RA,AS09G01056-RA,AS08G00291-RA,AS02G02722-RA,AS04G02158-RA,AS10G02326-RA,AS05G01464-RA,AS02G01907-RA,AS06G01981-RA,AS08G00124-RA,AS08G03187-RA,AS03G02434-RA,AS05G01017-RA,AS07G03536-RA,AS09G02128-RA,AS01G02678-RA,AS02G02524-RA,AS07G03…	0.0297405182134458
109	BP	GO:0016123	xanthophyll biosynthetic process	AS09G00215-RA,AS08G02992-RA,AS05G02258-RA,AS04G00671-RA,AS07G03164-RA,AS01G00678-RA,AS07G00114-RA,AS01G02116-RA,AS06G00626-RA	0.0311801079637656
110	BP	GO:0009823	cytokinin catabolic process	AS05G03772-RA,AS01G02028-RA,AS09G01022-RA,AS08G03959-RA,AS06G00940-RA,AS09G02931-RA,AS04G03078-RA	0.0327306486173404
111	BP	GO:0010087	phloem or xylem histogenesis	AS02G00201-RA,AS11G01588-RA,AS10G00350-RA,AS05G02371-RA,AS02G00687-RA,AS02G03541-RA,AS01G00482-RA,AS03G02131-RA,AS04G02400-RA,AS01G00371-RA,AS02G01402-RA,AS08G02088-RA,AS07G03209-RA,AS10G01112-RA,AS05G01661-RA,AS01G03414-RA,AS01G03444-RA,AS08G01987-RA,AS10G01334-RA,AS08G00834-RA,AS04G01399-RA,AS08G00735-RA,AS11G01868-RA,AS05G02391-RA,AS01G03423-RA,AS11G01197-RA,AS08G00835-RA,AS06G00017-RA,AS10G01…	0.0327306486173404
112	BP	GO:0010344	seed oilbody biogenesis	AS03G01688-RA,AS02G02089-RA,AS06G00523-RA,AS06G02104-RA,AS11G00470-RA,AS01G03448-RA,AS07G03422-RA	0.0327306486173404
113	MF	GO:0019139	cytokinin dehydrogenase activity	AS05G03772-RA,AS01G02028-RA,AS09G01022-RA,AS08G03959-RA,AS06G00940-RA,AS09G02931-RA,AS04G03078-RA	0.0327306486173404
114	BP	GO:0098655	cation transmembrane transport	AS08G03763-RA,AS06G00379-RA,AS07G01198-RA,AS08G02302-RA,AS07G00034-RA,AS06G03011-RA,AS06G02506-RA,AS05G00133-RA,AS02G02608-RA,AS08G03804-RA,AS02G00475-RA,AS08G03846-RA,AS01G03792-RA,AS06G03390-RA,AS06G01586-RA,AS05G01659-RA,AS07G00212-RA,AS04G02962-RA,AS10G01934-RA,AS08G01392-RA,AS01G03438-RA,AS08G03415-RA,AS07G00074-RA,AS08G03327-RA,AS09G02562-RA,AS03G00739-RA,AS09G01370-RA,AS05G02786-RA,AS09G01…	0.0327852729120529
115	BP	GO:0070588	calcium ion transmembrane transport	AS06G03011-RA,AS07G00212-RA,AS04G02962-RA,AS06G01506-RA,AS01G00687-RA,AS02G03783-RA,AS11G01276-RA,AS08G02855-RA,AS02G01181-RA,AS05G00111-RA,AS04G02413-RA,AS11G00968-RA,AS06G00833-RA,AS06G03379-RA,AS06G03056-RA,AS06G02764-RA,AS01G01211-RA,AS04G02403-RA,AS07G01974-RA,AS02G02965-RA,AS03G02034-RA,AS11G02699-RA,AS01G01430-RA,AS03G02814-RA,AS04G01129-RA,AS04G00807-RA,AS07G02643-RA,AS02G03531-RA	0.03432685001876
116	MF	GO:0004553	hydrolase activity, hydrolyzing O-glycosyl compounds	AS04G00009-RA,AS11G01636-RA,AS01G00561-RA,AS02G02346-RA,AS03G01787-RA,AS08G00705-RA,AS11G01997-RA,AS11G02591-RA,AS08G02978-RA,AS02G02347-RA,AS06G01146-RA,AS06G02919-RA,AS04G03663-RA,AS09G00741-RA,AS05G03753-RA,AS05G03367-RA,AS11G02137-RA,AS10G02131-RA,AS05G01718-RA,AS04G00580-RA,AS10G01587-RA,AS11G01742-RA,AS07G03236-RA,AS05G03601-RA,AS02G00172-RA,AS09G02131-RA,AS08G00521-RA,AS06G03453-RA,AS04G03…	0.0346364159815596
117	BP	GO:0006816	calcium ion transport	AS06G03011-RA,AS07G00212-RA,AS04G02962-RA,AS06G01506-RA,AS01G00687-RA,AS02G03783-RA,AS11G01276-RA,AS08G02855-RA,AS02G01181-RA,AS05G00111-RA,AS04G02413-RA,AS11G00968-RA,AS06G00833-RA,AS06G03379-RA,AS06G03056-RA,AS06G02764-RA,AS01G01211-RA,AS04G02403-RA,AS07G01974-RA,AS02G02965-RA,AS04G00501-RA,AS03G02034-RA,AS11G02699-RA,AS01G01430-RA,AS03G02814-RA,AS04G01129-RA,AS04G00807-RA,AS07G02643-RA,AS02G03…	0.0362247466710556
118	BP	GO:0009808	lignin metabolic process	AS02G01011-RA,AS03G00113-RA,AS01G01384-RA,AS04G02686-RA,AS09G00193-RA,AS06G03766-RA,AS09G00633-RA,AS01G01031-RA,AS04G00573-RA,AS09G00734-RA,AS06G02552-RA,AS06G03499-RA,AS08G00466-RA,AS05G00277-RA,AS05G01554-RA,AS06G00321-RA,AS07G00843-RA,AS05G00657-RA,AS05G02312-RA,AS05G01557-RA,AS11G00901-RA,AS06G03538-RA,AS01G01864-RA,AS01G01036-RA	0.0362247466710556
119	BP	GO:0048528	post-embryonic root development	AS05G00082-RA,AS05G00553-RA,AS10G00143-RA,AS04G02686-RA,AS06G00881-RA,AS01G03086-RA,AS08G03841-RA,AS09G02285-RA,AS08G03415-RA,AS06G00294-RA,AS01G01402-RA,AS02G01929-RA,AS11G01487-RA,AS11G00690-RA,AS03G02140-RA,AS07G00855-RA,AS09G01439-RA,AS11G01488-RA,AS08G01987-RA,AS03G02776-RA,AS09G00722-RA,AS02G02941-RA,AS04G02779-RA,AS11G02192-RA,AS06G00826-RA,AS04G01115-RA,AS07G02624-RA,AS04G03629-RA,AS05G03…	0.0362247466710556
120	BP	GO:1900057	positive regulation of leaf senescence	AS10G00143-RA,AS05G00032-RA,AS06G02623-RA,AS10G02583-RA,AS08G02223-RA,AS06G00024-RA,AS07G02624-RA,AS03G02018-RA,AS04G01097-RA,AS01G00028-RA,AS05G00256-RA,AS01G00059-RA	0.0362247466710556
121	BP	GO:1905623	positive regulation of leaf development	AS10G00143-RA,AS05G00032-RA,AS06G02623-RA,AS10G02583-RA,AS08G02223-RA,AS06G00024-RA,AS07G02624-RA,AS03G02018-RA,AS04G01097-RA,AS01G00028-RA,AS05G00256-RA,AS01G00059-RA	0.0362247466710556
122	BP	GO:0044264	cellular polysaccharide metabolic process	AS06G03877-RA,AS11G01454-RA,AS07G02652-RA,AS03G01682-RA,AS10G01628-RA,AS04G02428-RA,AS07G01597-RA,AS01G01002-RA,AS11G01636-RA,AS06G02856-RA,AS01G00561-RA,AS05G01042-RA,AS08G03558-RA,AS02G03148-RA,AS11G01054-RA,AS05G01492-RA,AS03G01787-RA,AS05G01757-RA,AS04G03294-RA,AS11G01586-RA,AS05G02342-RA,AS07G00877-RA,AS08G02978-RA,AS01G00641-RA,AS05G03183-RA,AS06G02919-RA,AS02G03214-RA,AS01G03217-RA,AS10G01…	0.0390928144528608
123	BP	GO:0044262	cellular carbohydrate metabolic process	AS06G03877-RA,AS11G01454-RA,AS07G02652-RA,AS03G01682-RA,AS08G00884-RA,AS10G01628-RA,AS04G02428-RA,AS05G01458-RA,AS07G01597-RA,AS01G01002-RA,AS11G01636-RA,AS06G02856-RA,AS01G00561-RA,AS05G01042-RA,AS10G00394-RA,AS08G03558-RA,AS05G01863-RA,AS09G01813-RA,AS02G03148-RA,AS11G01054-RA,AS05G01492-RA,AS03G02171-RA,AS03G01787-RA,AS02G03587-RA,AS05G01757-RA,AS04G03294-RA,AS01G03086-RA,AS11G01586-RA,AS05G02…	0.040142784864976
124	BP	GO:0006790	sulfur compound metabolic process	AS03G02884-RA,AS04G02266-RA,AS01G00665-RA,AS01G03357-RA,AS06G02568-RA,AS08G00235-RA,AS08G03553-RA,AS01G00731-RA,AS02G03727-RA,AS08G02112-RA,AS03G01841-RA,AS02G01929-RA,AS02G00440-RA,AS03G02878-RA,AS01G03593-RA,AS02G00666-RA,AS02G03687-RA,AS08G00200-RA,AS06G00259-RA,AS02G02928-RA,AS08G00537-RA,AS01G03823-RA,AS04G02270-RA,AS11G02355-RA,AS03G00048-RA,AS06G01068-RA,AS04G03172-RA,AS05G02931-RA,AS07G01…	0.0410198765603049
125	BP	GO:0009620	response to fungus	AS11G01454-RA,AS01G03357-RA,AS06G01196-RA,AS05G01863-RA,AS05G00026-RA,AS04G02962-RA,AS07G02683-RA,AS01G03086-RA,AS01G03184-RA,AS05G01265-RA,AS04G02400-RA,AS05G01927-RA,AS10G01060-RA,AS03G00035-RA,AS07G00753-RA,AS06G00571-RA,AS11G01194-RA,AS08G00257-RA,AS06G00697-RA,AS03G00048-RA,AS04G02130-RA,AS05G01661-RA,AS05G03307-RA,AS09G01066-RA,AS01G00309-RA,AS01G03444-RA,AS01G00035-RA,AS02G01765-RA,AS05G00…	0.0418808941899292
126	BP	GO:0006949	syncytium formation	AS02G00905-RA,AS08G00437-RA,AS01G02458-RA,AS02G02274-RA,AS06G03588-RA,AS04G01147-RA,AS10G00852-RA,AS01G00683-RA	0.0420711400030314
127	BP	GO:0071248	cellular response to metal ion	AS06G00379-RA,AS08G03804-RA,AS01G03046-RA,AS10G01934-RA,AS02G02607-RA,AS09G02285-RA,AS06G00294-RA,AS04G02400-RA,AS03G02878-RA,AS07G02566-RA,AS09G01065-RA,AS09G01882-RA,AS01G02283-RA,AS04G01032-RA,AS10G00774-RA,AS04G01115-RA,AS08G03515-RA,AS01G02662-RA,AS11G00942-RA,AS04G01454-RA,AS04G00953-RA,AS02G02709-RA,AS09G01561-RA,AS04G00952-RA,AS02G03823-RA,AS01G01189-RA,AS01G00602-RA,AS09G00909-RA,AS07G02…	0.0420711400030314
128	BP	GO:0071229	cellular response to acid chemical	AS09G00635-RA,AS03G00884-RA,AS03G00197-RA,AS03G01136-RA,AS11G01071-RA,AS09G02523-RA,AS05G01659-RA,AS08G03419-RA,AS06G01152-RA,AS04G02962-RA,AS04G00977-RA,AS02G00057-RA,AS08G00705-RA,AS02G02607-RA,AS07G03088-RA,AS10G01718-RA,AS09G02870-RA,AS04G00608-RA,AS07G03374-RA,AS06G02612-RA,AS07G02471-RA,AS08G02427-RA,AS06G00259-RA,AS07G02755-RA,AS01G03321-RA,AS08G00537-RA,AS04G03343-RA,AS06G01506-RA,AS05G03…	0.0422208043848889
129	BP	GO:0006972	hyperosmotic response	AS05G03672-RA,AS07G02560-RA,AS07G00865-RA,AS10G02131-RA,AS01G00456-RA,AS01G03321-RA,AS03G01878-RA,AS02G01478-RA,AS05G01785-RA,AS03G00402-RA,AS05G02988-RA,AS02G01059-RA,AS01G01182-RA,AS01G00651-RA,AS02G02274-RA,AS04G01358-RA,AS01G02675-RA,AS10G01807-RA,AS01G00044-RA,AS01G03645-RA,AS10G00413-RA,AS10G02031-RA,AS01G01847-RA,AS02G03761-RA	0.0433251918096235
130	BP	GO:0016052	carbohydrate catabolic process	AS02G02884-RA,AS07G02652-RA,AS03G01682-RA,AS07G01597-RA,AS01G01002-RA,AS11G01636-RA,AS10G01748-RA,AS01G00561-RA,AS05G01042-RA,AS09G01813-RA,AS03G02171-RA,AS03G01787-RA,AS02G03587-RA,AS04G03294-RA,AS05G02342-RA,AS11G01997-RA,AS08G02978-RA,AS06G01146-RA,AS06G02919-RA,AS05G03753-RA,AS10G00011-RA,AS10G01060-RA,AS08G02713-RA,AS04G03389-RA,AS04G00580-RA,AS05G03601-RA,AS08G00521-RA,AS06G00898-RA,AS04G00…	0.0433251918096235
131	MF	GO:0005509	calcium ion binding	AS05G02677-RA,AS07G00313-RA,AS10G02307-RA,AS02G03782-RA,AS07G03324-RA,AS07G00639-RA,AS09G02754-RA,AS09G01882-RA,AS11G01568-RA,AS02G01478-RA,AS05G03569-RA,AS05G00750-RA,AS07G01550-RA,AS06G03256-RA,AS04G01789-RA,AS02G01181-RA,AS03G01869-RA,AS01G00022-RA,AS11G02145-RA,AS08G03956-RA,AS08G04031-RA,AS11G02147-RA,AS06G00085-RA,AS05G02217-RA,AS10G02562-RA,AS01G01560-RA,AS06G02342-RA,AS07G03121-RA,AS05G01…	0.0436577313579062
132	MF	GO:0015103	inorganic anion transmembrane transporter activity	AS09G01485-RA,AS11G01739-RA,AS07G02064-RA,AS03G01977-RA,AS04G00065-RA,AS02G01503-RA,AS10G01414-RA,AS09G01556-RA,AS08G00702-RA,AS09G03031-RA,AS02G00644-RA,AS04G00337-RA,AS04G00431-RA,AS02G02980-RA,AS08G00395-RA,AS02G00255-RA,AS06G02643-RA,AS09G03061-RA,AS07G01972-RA,AS06G02141-RA,AS03G03022-RA,AS07G00770-RA,AS08G03097-RA,AS04G03519-RA,AS02G00266-RA,AS08G02940-RA,AS02G00530-RA,AS10G00111-RA,AS11G02…	0.0455775482378375
133	MF	GO:0016701	oxidoreductase activity, acting on single donors with incorporation of molecular oxygen	AS06G03005-RA,AS09G03024-RA,AS02G00021-RA,AS10G02852-RA,AS03G02140-RA,AS09G01056-RA,AS08G00291-RA,AS10G02326-RA,AS09G02128-RA,AS11G02180-RA,AS02G02524-RA,AS07G03649-RA,AS07G00670-RA,AS10G02325-RA	0.0455775482378375
134	BP	GO:0006521	regulation of cellular amino acid metabolic process	AS02G03218-RA,AS09G02523-RA,AS02G01929-RA,AS06G02964-RA,AS07G03239-RA,AS02G01316-RA,AS01G03108-RA,AS05G02756-RA,AS08G01085-RA	0.0472050266729649
135	BP	GO:0033238	regulation of cellular amine metabolic process	AS02G03218-RA,AS09G02523-RA,AS02G01929-RA,AS06G02964-RA,AS07G03239-RA,AS02G01316-RA,AS01G03108-RA,AS05G02756-RA,AS08G01085-RA	0.0472050266729649
136	MF	GO:0022804	active transmembrane transporter activity	AS07G01198-RA,AS07G00034-RA,AS06G03011-RA,AS06G02506-RA,AS02G02608-RA,AS02G00475-RA,AS02G01323-RA,AS01G03792-RA,AS08G03181-RA,AS03G02304-RA,AS06G03390-RA,AS06G01586-RA,AS05G01100-RA,AS07G00212-RA,AS08G01135-RA,AS01G02396-RA,AS01G03255-RA,AS01G03438-RA,AS08G03415-RA,AS07G00074-RA,AS08G03327-RA,AS07G02713-RA,AS04G00151-RA,AS09G02562-RA,AS09G01370-RA,AS04G03179-RA,AS05G02786-RA,AS08G03445-RA,AS01G01…	0.0493241243116958
137	CC	GO:0044815	DNA packaging complex	AS08G02856-RA,AS03G00483-RA,AS01G03667-RA,AS05G02491-RA,AS02G00588-RA,AS01G01174-RA,AS07G02472-RA,AS01G01212-RA,AS03G00491-RA,AS09G02135-RA,AS02G00599-RA,AS05G03461-RA	0.04956450846415
138	MF	GO:0016798	hydrolase activity, acting on glycosyl bonds	AS04G00009-RA,AS11G01636-RA,AS01G00561-RA,AS02G02346-RA,AS03G01787-RA,AS08G00705-RA,AS11G01997-RA,AS11G02591-RA,AS08G02978-RA,AS02G02347-RA,AS06G01146-RA,AS06G02919-RA,AS04G03663-RA,AS09G00741-RA,AS05G03753-RA,AS05G03367-RA,AS11G02137-RA,AS10G02131-RA,AS05G01718-RA,AS06G01280-RA,AS04G00580-RA,AS10G01587-RA,AS11G01742-RA,AS07G03236-RA,AS05G03601-RA,AS02G00172-RA,AS01G00039-RA,AS09G02131-RA,AS08G00…	0.049663469925337
139	BP	GO:0009608	response to symbiont	AS06G01196-RA,AS05G01265-RA,AS05G01927-RA,AS10G01060-RA,AS01G03321-RA,AS05G01780-RA,AS05G02911-RA,AS06G00765-RA,AS03G00346-RA,AS05G01790-RA,AS05G00769-RA	0.0498754896124651
140	BP	GO:0009958	positive gravitropism	AS07G03044-RA,AS01G01402-RA,AS07G01953-RA,AS03G02705-RA,AS07G00855-RA,AS06G01986-RA,AS07G01458-RA,AS11G00720-RA,AS05G03507-RA,AS06G00123-RA,AS08G03535-RA,AS07G03421-RA,AS08G02283-RA,AS04G02770-RA,AS06G02731-RA,AS08G03534-RA	0.0498754896124651
141	BP	GO:0016108	tetraterpenoid metabolic process	AS06G03005-RA,AS09G03024-RA,AS08G02468-RA,AS09G00215-RA,AS04G02583-RA,AS08G02992-RA,AS09G01056-RA,AS05G02258-RA,AS04G00671-RA,AS07G03164-RA,AS01G00678-RA,AS07G00114-RA,AS01G02116-RA,AS05G03716-RA,AS08G00239-RA,AS06G00626-RA	0.0498754896124651
142	BP	GO:0016116	carotenoid metabolic process	AS06G03005-RA,AS09G03024-RA,AS08G02468-RA,AS09G00215-RA,AS04G02583-RA,AS08G02992-RA,AS09G01056-RA,AS05G02258-RA,AS04G00671-RA,AS07G03164-RA,AS01G00678-RA,AS07G00114-RA,AS01G02116-RA,AS05G03716-RA,AS08G00239-RA,AS06G00626-RA	0.0498754896124651

## Sheet: DEGs-A10vsA5 （KRGG）
No.	ID	Description	GeneRatio	BgRatio	pvalue	p.adjust	qvalue	geneID	Count	Ratio
1	ko00906	Carotenoid biosynthesis	25/2682	48/14627	1.31543120108697e-07	1.41035016170719e-05	1.05432250648442e-05	AS09G03024-RA/AS02G00021-RA/AS08G02468-RA/AS11G00825-RA/AS11G01188-RA/AS08G02992-RA/AS10G02852-RA/AS05G02258-RA/AS01G03032-RA/AS08G01482-RA/AS07G00114-RA/AS05G02175-RA/AS05G02818-RA/AS08G03466-RA/AS04G01913-RA/AS05G03716-RA/AS01G00378-RA/AS09G02128-RA/AS06G00626-RA/AS09G03090-RA/AS05G02176-RA/AS06G01509-RA/AS02G03651-RA/AS06G03440-RA/AS01G00137-RA	25	0.0093214019388516
2	ko04075	Plant hormone signal transduction	117/2682	407/14627	1.32895968281585e-07	1.41035016170719e-05	1.05432250648442e-05	AS09G00635-RA/AS10G00126-RA/AS10G00144-RA/AS01G00665-RA/AS11G01447-RA/AS07G01556-RA/AS09G03010-RA/AS02G02454-RA/AS09G01157-RA/AS02G02478-RA/AS04G01931-RA/AS10G00143-RA/AS06G00881-RA/AS04G00746-RA/AS08G03841-RA/AS02G03098-RA/AS10G01718-RA/AS06G02943-RA/AS02G00963-RA/AS04G03049-RA/AS01G02945-RA/AS01G01402-RA/AS08G02967-RA/AS04G02400-RA/AS04G00842-RA/AS07G02566-RA/AS10G01128-RA/AS06G02623-RA/AS07G02…	117	0.0436241610738255
3	ko00940	Phenylpropanoid biosynthesis	74/2682	227/14627	1.47295056052971e-07	1.41035016170719e-05	1.05432250648442e-05	AS05G00210-RA/AS06G00357-RA/AS10G01519-RA/AS06G03794-RA/AS06G01888-RA/AS06G00953-RA/AS09G02424-RA/AS01G03632-RA/AS03G00298-RA/AS05G03725-RA/AS01G00430-RA/AS01G02476-RA/AS01G03056-RA/AS06G03766-RA/AS09G00633-RA/AS05G03307-RA/AS06G01930-RA/AS01G00035-RA/AS01G01031-RA/AS10G01721-RA/AS04G02137-RA/AS06G00954-RA/AS08G03786-RA/AS10G01850-RA/AS04G00573-RA/AS09G00734-RA/AS03G00437-RA/AS06G02552-RA/AS01G00…	74	0.0275913497390007
4	ko04016	MAPK signaling pathway - plant	74/2682	227/14627	1.47295056052971e-07	1.41035016170719e-05	1.05432250648442e-05	AS09G00635-RA/AS08G00777-RA/AS10G00126-RA/AS02G02454-RA/AS10G02934-RA/AS04G01931-RA/AS07G00212-RA/AS08G03841-RA/AS10G02307-RA/AS10G01718-RA/AS02G00963-RA/AS05G02019-RA/AS04G02400-RA/AS07G02566-RA/AS07G02471-RA/AS02G03455-RA/AS07G03324-RA/AS02G02189-RA/AS02G00184-RA/AS08G01811-RA/AS03G00048-RA/AS05G03190-RA/AS08G01535-RA/AS02G01478-RA/AS06G03256-RA/AS02G03783-RA/AS04G01789-RA/AS08G01220-RA/AS11G02…	74	0.0275913497390007
5	ko00199	Cytochrome P450 [BR:ko00199]	98/2682	330/14627	2.66740307347318e-07	2.04323075428046e-05	1.52743923365201e-05	AS09G00870-RA/AS08G02989-RA/AS08G02096-RA/AS02G01945-RA/AS05G02429-RA/AS03G03071-RA/AS01G03046-RA/AS07G03015-RA/AS05G00666-RA/AS03G01819-RA/AS04G00608-RA/AS06G02222-RA/AS02G01497-RA/AS01G03823-RA/AS04G01453-RA/AS09G00047-RA/AS08G00713-RA/AS11G02111-RA/AS01G03077-RA/AS05G03438-RA/AS05G00671-RA/AS03G00837-RA/AS03G00272-RA/AS06G00607-RA/AS09G00043-RA/AS05G00196-RA/AS01G00297-RA/AS06G02080-RA/AS01G02…	98	0.0365398956002983
6	ko00500	Starch and sucrose metabolism	68/2682	209/14627	5.04017375789189e-07	3.21731091545432e-05	2.4051355476256e-05	AS06G03877-RA/AS07G02652-RA/AS10G01628-RA/AS07G01597-RA/AS01G00561-RA/AS02G03148-RA/AS06G00860-RA/AS09G03077-RA/AS05G01757-RA/AS04G03294-RA/AS08G00705-RA/AS05G03564-RA/AS07G02663-RA/AS06G01573-RA/AS05G03183-RA/AS06G01146-RA/AS03G00537-RA/AS07G01590-RA/AS09G00741-RA/AS01G03217-RA/AS07G00639-RA/AS07G00526-RA/AS10G02131-RA/AS08G02713-RA/AS04G01599-RA/AS10G01587-RA/AS06G00567-RA/AS05G01755-RA/AS08G00…	68	0.0253542132736764
7	ko04613	Neutrophil extracellular trap formation	52/2682	152/14627	2.04692404783798e-06	0.000111995987188849	8.37238106784858e-05	AS05G01955-RA/AS03G01023-RA/AS09G02285-RA/AS06G02995-RA/AS07G03374-RA/AS08G02856-RA/AS01G01178-RA/AS03G00483-RA/AS01G03667-RA/AS09G02978-RA/AS05G02491-RA/AS02G00588-RA/AS01G01174-RA/AS02G00735-RA/AS02G01134-RA/AS02G00875-RA/AS07G02472-RA/AS01G01212-RA/AS01G01297-RA/AS08G02881-RA/AS02G01910-RA/AS04G03141-RA/AS06G03372-RA/AS03G00491-RA/AS02G00600-RA/AS05G00394-RA/AS01G03539-RA/AS09G01068-RA/AS11G01…	52	0.0193885160328113
8	ko05034	Alcoholism	49/2682	142/14627	3.0212422924934e-06	0.000142388784871344	0.000106444275072161	AS08G02856-RA/AS01G01178-RA/AS03G00483-RA/AS07G03324-RA/AS01G03667-RA/AS09G02978-RA/AS05G02491-RA/AS02G00588-RA/AS01G01174-RA/AS02G00735-RA/AS02G01134-RA/AS02G00875-RA/AS07G02472-RA/AS01G01212-RA/AS01G01297-RA/AS08G02881-RA/AS02G01910-RA/AS04G03141-RA/AS08G03271-RA/AS03G00491-RA/AS02G00600-RA/AS01G03539-RA/AS11G01277-RA/AS02G00584-RA/AS09G02135-RA/AS02G00596-RA/AS11G02192-RA/AS06G03256-RA/AS02G00…	49	0.0182699478001491
9	ko05322	Systemic lupus erythematosus	34/2682	86/14627	3.34595055833446e-06	0.000142388784871344	0.000106444275072161	AS08G02856-RA/AS01G01178-RA/AS03G00483-RA/AS01G03667-RA/AS05G02491-RA/AS02G00588-RA/AS01G01174-RA/AS02G00735-RA/AS02G01134-RA/AS02G00875-RA/AS07G02472-RA/AS01G01212-RA/AS01G01297-RA/AS02G01910-RA/AS04G03141-RA/AS03G00491-RA/AS02G00600-RA/AS01G03539-RA/AS11G01277-RA/AS02G00584-RA/AS09G02135-RA/AS02G00596-RA/AS02G00599-RA/AS05G03470-RA/AS02G01109-RA/AS07G00027-RA/AS02G02959-RA/AS05G03461-RA/AS08G01…	34	0.0126771066368382
10	ko04936	Alcoholic liver disease	95/2682	356/14627	5.33107894711428e-05	0.0018677484417317	0.00139625553428892	AS11G02527-RA/AS03G02955-RA/AS05G01617-RA/AS08G02714-RA/AS04G02788-RA/AS01G01757-RA/AS03G01244-RA/AS04G00977-RA/AS06G02683-RA/AS09G02285-RA/AS06G02590-RA/AS05G01265-RA/AS08G01809-RA/AS04G02369-RA/AS07G00753-RA/AS08G02690-RA/AS01G02476-RA/AS03G01242-RA/AS05G00044-RA/AS08G02130-RA/AS06G01396-RA/AS04G02112-RA/AS01G01054-RA/AS05G01708-RA/AS07G00653-RA/AS09G02533-RA/AS03G02744-RA/AS04G02923-RA/AS04G03…	95	0.0354213273676361
11	ko04927	Cortisol synthesis and secretion	30/2682	81/14627	5.40409047279811e-05	0.0018677484417317	0.00139625553428892	AS09G00870-RA/AS01G03046-RA/AS07G03015-RA/AS01G03823-RA/AS08G00713-RA/AS11G02111-RA/AS01G03077-RA/AS03G00837-RA/AS05G00196-RA/AS01G02780-RA/AS11G01296-RA/AS02G01008-RA/AS08G03515-RA/AS07G01564-RA/AS11G00944-RA/AS01G03824-RA/AS07G03445-RA/AS09G00207-RA/AS06G02522-RA/AS06G00884-RA/AS01G03016-RA/AS11G02439-RA/AS03G02658-RA/AS04G03742-RA/AS01G02713-RA/AS11G00946-RA/AS07G03446-RA/AS10G00585-RA/AS02G03…	30	0.0111856823266219
12	ko05417	Lipid and atherosclerosis	118/2682	462/14627	5.85195334224032e-05	0.0018677484417317	0.00139625553428892	AS11G02527-RA/AS08G02989-RA/AS03G02955-RA/AS04G02788-RA/AS01G01757-RA/AS03G01244-RA/AS03G01023-RA/AS06G02683-RA/AS09G02285-RA/AS04G03481-RA/AS05G00616-RA/AS05G01265-RA/AS07G03374-RA/AS06G02222-RA/AS07G03324-RA/AS06G00700-RA/AS07G00753-RA/AS08G02690-RA/AS03G01242-RA/AS04G03533-RA/AS08G02130-RA/AS06G01396-RA/AS01G00002-RA/AS08G02881-RA/AS11G02111-RA/AS05G00394-RA/AS05G01911-RA/AS01G02283-RA/AS07G00…	118	0.0439970171513796
13	ko04626	Plant-pathogen interaction	77/2682	278/14627	7.17058095303021e-05	0.00211256346539275	0.0015792696511937	AS10G00026-RA/AS05G01659-RA/AS10G01508-RA/AS10G02307-RA/AS07G00934-RA/AS01G00944-RA/AS03G02457-RA/AS05G00616-RA/AS07G03324-RA/AS09G02754-RA/AS01G01623-RA/AS06G00571-RA/AS04G03533-RA/AS07G03345-RA/AS03G00048-RA/AS04G02130-RA/AS08G01535-RA/AS01G02283-RA/AS01G01339-RA/AS05G03569-RA/AS06G02396-RA/AS05G00750-RA/AS11G02192-RA/AS06G03256-RA/AS04G01789-RA/AS05G02911-RA/AS06G00936-RA/AS07G00126-RA/AS02G01…	77	0.0287099179716629
14	ko04913	Ovarian steroidogenesis	36/2682	106/14627	8.63135092147627e-05	0.00236129100208958	0.00176520860950492	AS09G00870-RA/AS08G02989-RA/AS01G03046-RA/AS07G03015-RA/AS06G02222-RA/AS01G03823-RA/AS08G00713-RA/AS11G02111-RA/AS01G03077-RA/AS03G00837-RA/AS05G00196-RA/AS01G02780-RA/AS11G01296-RA/AS02G01008-RA/AS08G03515-RA/AS07G01564-RA/AS11G00944-RA/AS04G00953-RA/AS01G03824-RA/AS07G03444-RA/AS07G03445-RA/AS04G00952-RA/AS09G00207-RA/AS06G02522-RA/AS06G00884-RA/AS01G03016-RA/AS11G02439-RA/AS03G02658-RA/AS08G01…	36	0.0134228187919463
15	ko04917	Prolactin signaling pathway	34/2682	99/14627	0.000104478262299446	0.00266767829737919	0.00199425174354031	AS11G02527-RA/AS09G00870-RA/AS01G03046-RA/AS07G03015-RA/AS01G03823-RA/AS08G02881-RA/AS08G00713-RA/AS11G02111-RA/AS01G03077-RA/AS11G02192-RA/AS03G00837-RA/AS05G00196-RA/AS01G02780-RA/AS11G01296-RA/AS02G01008-RA/AS08G03515-RA/AS07G01564-RA/AS11G00944-RA/AS01G02675-RA/AS01G03824-RA/AS07G03445-RA/AS09G00207-RA/AS06G02522-RA/AS06G00884-RA/AS01G03016-RA/AS11G02439-RA/AS03G02658-RA/AS04G03742-RA/AS01G02…	34	0.0126771066368382
16	ko04934	Cushing syndrome	42/2682	132/14627	0.000127201190286481	0.00304487849248265	0.00227623182617914	AS11G02527-RA/AS09G00870-RA/AS01G03046-RA/AS07G03015-RA/AS08G00381-RA/AS01G03823-RA/AS08G02881-RA/AS08G03271-RA/AS08G00713-RA/AS11G02111-RA/AS01G03077-RA/AS11G02192-RA/AS03G00837-RA/AS06G01216-RA/AS05G00196-RA/AS01G02780-RA/AS01G02586-RA/AS05G02938-RA/AS11G01296-RA/AS02G01008-RA/AS08G03515-RA/AS07G01564-RA/AS11G00944-RA/AS03G02944-RA/AS01G02675-RA/AS01G03824-RA/AS08G03425-RA/AS07G03445-RA/AS05G00…	42	0.0156599552572707
17	ko04620	Toll-like receptor signaling pathway	77/2682	284/14627	0.000152248559368533	0.00343007048459696	0.00256418626304898	AS03G02955-RA/AS04G02788-RA/AS01G01757-RA/AS03G01244-RA/AS03G01023-RA/AS06G02683-RA/AS09G02285-RA/AS05G01265-RA/AS07G03374-RA/AS07G00753-RA/AS08G02690-RA/AS03G01242-RA/AS08G02130-RA/AS06G01396-RA/AS08G02881-RA/AS05G00394-RA/AS07G00653-RA/AS09G02533-RA/AS03G02744-RA/AS04G02923-RA/AS04G03186-RA/AS05G01780-RA/AS11G02192-RA/AS07G00050-RA/AS01G03569-RA/AS02G00325-RA/AS04G03022-RA/AS08G03718-RA/AS09G01…	77	0.0287099179716629
18	ko04722	Neurotrophin signaling pathway	91/2682	348/14627	0.000165754217207752	0.00352688139947605	0.00263655830880167	AS11G02527-RA/AS03G02955-RA/AS04G02788-RA/AS01G01757-RA/AS03G01244-RA/AS03G01023-RA/AS06G02683-RA/AS05G01265-RA/AS07G03374-RA/AS07G03324-RA/AS07G00753-RA/AS08G02690-RA/AS03G01242-RA/AS08G02130-RA/AS06G01396-RA/AS08G02881-RA/AS08G03271-RA/AS05G00394-RA/AS05G01911-RA/AS07G00653-RA/AS09G02533-RA/AS03G02744-RA/AS04G02923-RA/AS04G03186-RA/AS05G01780-RA/AS03G00674-RA/AS11G02192-RA/AS06G03256-RA/AS07G00…	91	0.0339299030574198
19	ko00140	Steroid hormone biosynthesis	37/2682	114/14627	0.000200060305651649	0.0040327945823464	0.00301475917657886	AS09G00870-RA/AS08G02989-RA/AS03G03071-RA/AS01G03046-RA/AS07G03015-RA/AS06G02222-RA/AS01G03823-RA/AS08G00713-RA/AS11G02111-RA/AS01G03077-RA/AS03G00837-RA/AS05G00196-RA/AS01G02780-RA/AS11G01296-RA/AS02G01008-RA/AS08G03515-RA/AS07G01564-RA/AS01G03677-RA/AS11G00944-RA/AS04G00953-RA/AS01G03824-RA/AS07G03445-RA/AS04G00952-RA/AS09G00207-RA/AS06G02522-RA/AS06G00884-RA/AS01G03016-RA/AS02G00275-RA/AS11G02…	37	0.0137956748695004
20	ko05135	Yersinia infection	83/2682	314/14627	0.000215596451940421	0.00412867205465907	0.00308643341725235	AS11G02527-RA/AS03G02955-RA/AS04G02788-RA/AS01G01757-RA/AS03G01244-RA/AS03G01023-RA/AS06G02683-RA/AS09G02285-RA/AS05G01265-RA/AS07G03374-RA/AS07G00753-RA/AS08G02690-RA/AS03G01242-RA/AS08G02130-RA/AS06G01396-RA/AS08G02881-RA/AS05G00394-RA/AS07G00653-RA/AS09G02533-RA/AS03G02744-RA/AS04G02923-RA/AS04G03186-RA/AS05G01780-RA/AS11G02192-RA/AS07G00050-RA/AS01G03569-RA/AS02G00325-RA/AS04G03022-RA/AS08G03…	83	0.0309470544369873
21	ko05133	Pertussis	79/2682	298/14627	0.0002739287781727	0.00499593914476877	0.00373476830390849	AS03G02955-RA/AS04G02788-RA/AS01G01757-RA/AS03G01244-RA/AS06G02683-RA/AS05G01265-RA/AS07G03324-RA/AS07G00753-RA/AS08G02690-RA/AS04G02479-RA/AS03G01242-RA/AS08G02130-RA/AS06G01396-RA/AS08G02881-RA/AS07G00653-RA/AS09G02533-RA/AS03G02744-RA/AS04G02923-RA/AS04G03186-RA/AS05G01780-RA/AS06G03256-RA/AS07G00050-RA/AS04G01789-RA/AS01G03569-RA/AS02G00325-RA/AS04G03022-RA/AS08G03295-RA/AS08G03718-RA/AS09G01…	79	0.0294556301267711
22	ko01524	Platinum drug resistance	30/2682	88/14627	0.000301049001492591	0.00524098943507556	0.00391795829693707	AS03G02967-RA/AS03G02304-RA/AS01G00731-RA/AS07G00212-RA/AS01G03255-RA/AS04G00151-RA/AS08G02726-RA/AS01G02742-RA/AS02G03455-RA/AS09G00050-RA/AS06G03008-RA/AS11G02355-RA/AS08G02881-RA/AS05G01911-RA/AS08G03753-RA/AS09G01051-RA/AS02G03783-RA/AS07G01023-RA/AS03G02968-RA/AS02G03117-RA/AS01G02537-RA/AS05G01748-RA/AS04G03468-RA/AS03G00141-RA/AS09G00774-RA/AS03G00142-RA/AS01G02417-RA/AS07G01160-RA/AS06G02…	30	0.0111856823266219
23	ko02026	Biofilm formation - Escherichia coli	9/2682	15/14627	0.000396643191312979	0.0066049714031683	0.0049376177591364	AS06G03877-RA/AS07G02652-RA/AS10G01628-RA/AS06G00860-RA/AS01G03217-RA/AS08G02713-RA/AS06G01713-RA/AS01G02103-RA/AS10G00823-RA	9	0.00335570469798658
24	ko05170	Human immunodeficiency virus 1 infection	101/2682	406/14627	0.000532556415747572	0.00834636179385216	0.00623941296668348	AS03G02955-RA/AS04G02788-RA/AS01G01757-RA/AS03G01244-RA/AS08G03280-RA/AS03G01023-RA/AS06G02683-RA/AS09G02285-RA/AS04G03481-RA/AS05G01265-RA/AS07G03374-RA/AS07G03324-RA/AS07G00753-RA/AS08G02690-RA/AS04G02479-RA/AS03G01242-RA/AS07G02395-RA/AS08G02130-RA/AS06G01396-RA/AS08G02881-RA/AS06G00613-RA/AS03G02939-RA/AS05G00394-RA/AS07G00653-RA/AS09G02533-RA/AS03G02744-RA/AS04G02923-RA/AS04G03186-RA/AS05G01…	101	0.0376584638329605
25	ko04624	Toll and Imd signaling pathway	75/2682	286/14627	0.000544801683671812	0.00834636179385216	0.00623941296668348	AS03G02955-RA/AS01G02895-RA/AS04G02788-RA/AS01G01757-RA/AS05G02725-RA/AS03G01244-RA/AS05G02551-RA/AS06G02683-RA/AS09G02285-RA/AS05G01265-RA/AS07G00753-RA/AS08G02690-RA/AS11G02430-RA/AS03G01242-RA/AS08G02130-RA/AS06G01396-RA/AS04G03514-RA/AS07G00653-RA/AS09G02533-RA/AS03G02744-RA/AS04G02923-RA/AS04G03186-RA/AS05G01780-RA/AS07G00050-RA/AS01G03569-RA/AS02G00325-RA/AS04G03022-RA/AS08G03718-RA/AS09G01…	75	0.0279642058165548
26	ko05140	Leishmaniasis	73/2682	278/14627	0.000615123607067912	0.00871835657626354	0.00651750168680413	AS03G02955-RA/AS04G02788-RA/AS01G01757-RA/AS03G01244-RA/AS06G02683-RA/AS09G02285-RA/AS05G01265-RA/AS07G00753-RA/AS08G02690-RA/AS03G01242-RA/AS08G02130-RA/AS06G01396-RA/AS08G02881-RA/AS07G00653-RA/AS09G02533-RA/AS03G02744-RA/AS04G02923-RA/AS04G03186-RA/AS05G01780-RA/AS07G00050-RA/AS01G03569-RA/AS02G00325-RA/AS04G03022-RA/AS08G03718-RA/AS09G01686-RA/AS07G00337-RA/AS11G00957-RA/AS11G01946-RA/AS02G00…	73	0.0272184936614467
27	ko04090	CD molecules [BR:ko04090]	19/2682	49/14627	0.000631129523762728	0.00871835657626354	0.00651750168680413	AS08G02302-RA/AS02G01323-RA/AS07G00639-RA/AS04G01279-RA/AS11G02145-RA/AS02G03234-RA/AS09G02768-RA/AS03G00196-RA/AS11G02147-RA/AS08G02283-RA/AS06G00409-RA/AS05G01973-RA/AS01G02345-RA/AS11G02515-RA/AS11G01724-RA/AS09G00161-RA/AS06G02731-RA/AS08G00917-RA/AS06G00772-RA	19	0.00708426547352722
28	ko01040	Biosynthesis of unsaturated fatty acids	23/2682	64/14627	0.000637373326724228	0.00871835657626354	0.00651750168680413	AS10G01244-RA/AS05G01617-RA/AS03G01609-RA/AS03G00485-RA/AS05G03642-RA/AS01G03677-RA/AS05G01855-RA/AS02G00133-RA/AS07G03224-RA/AS02G01893-RA/AS05G03644-RA/AS04G00012-RA/AS02G00275-RA/AS03G00488-RA/AS05G03645-RA/AS06G00509-RA/AS11G01807-RA/AS08G01916-RA/AS11G01811-RA/AS03G00439-RA/AS03G00487-RA/AS03G00486-RA/AS01G01440-RA	23	0.00857568978374348
29	ko00905	Brassinosteroid biosynthesis	15/2682	35/14627	0.000678951383827693	0.00896684068986229	0.00670325867154746	AS07G03015-RA/AS04G00608-RA/AS05G03438-RA/AS05G00671-RA/AS05G00196-RA/AS06G02080-RA/AS07G02696-RA/AS11G00944-RA/AS08G02546-RA/AS06G02711-RA/AS04G02523-RA/AS01G03045-RA/AS04G00204-RA/AS04G03742-RA/AS11G00946-RA	15	0.00559284116331096
30	ko02010	ABC transporters	22/2682	61/14627	0.000784382423207581	0.00962318522143442	0.0071939161199125	AS08G02302-RA/AS02G01323-RA/AS03G02304-RA/AS01G03255-RA/AS04G00151-RA/AS04G01371-RA/AS08G03753-RA/AS04G01279-RA/AS07G01023-RA/AS02G03117-RA/AS02G03234-RA/AS09G02768-RA/AS08G02283-RA/AS05G01973-RA/AS01G02345-RA/AS11G02515-RA/AS11G01724-RA/AS06G02731-RA/AS08G00917-RA/AS06G00772-RA/AS01G02417-RA/AS06G02177-RA	22	0.00820283370618941
31	ko04010	MAPK signaling pathway	96/2682	387/14627	0.000797541127492798	0.00962318522143442	0.0071939161199125	AS03G02955-RA/AS04G02788-RA/AS01G01757-RA/AS03G01244-RA/AS01G03721-RA/AS03G01023-RA/AS06G02683-RA/AS09G02285-RA/AS06G01179-RA/AS04G03481-RA/AS05G01265-RA/AS07G03374-RA/AS07G00753-RA/AS08G02690-RA/AS03G01242-RA/AS08G02130-RA/AS06G01396-RA/AS04G00483-RA/AS08G02881-RA/AS08G03271-RA/AS05G00394-RA/AS07G00653-RA/AS09G02533-RA/AS01G00427-RA/AS01G00426-RA/AS03G02744-RA/AS04G02487-RA/AS04G02923-RA/AS04G03…	96	0.0357941834451902
32	ko05161	Hepatitis B	79/2682	308/14627	0.000804025919284338	0.00962318522143442	0.0071939161199125	AS03G02955-RA/AS04G02788-RA/AS01G01757-RA/AS03G01244-RA/AS06G02683-RA/AS09G02285-RA/AS05G01265-RA/AS07G00753-RA/AS08G02690-RA/AS03G01242-RA/AS08G02130-RA/AS06G01396-RA/AS08G02881-RA/AS08G03271-RA/AS07G00653-RA/AS09G02533-RA/AS03G02744-RA/AS04G02923-RA/AS04G03186-RA/AS05G01780-RA/AS11G02192-RA/AS07G00050-RA/AS01G03569-RA/AS02G00325-RA/AS06G01216-RA/AS04G03022-RA/AS01G02586-RA/AS08G03718-RA/AS05G02…	79	0.0294556301267711
33	ko04064	NF-kappa B signaling pathway	71/2682	274/14627	0.00107151086333691	0.0124360200199406	0.00929668117472539	AS03G02955-RA/AS04G02788-RA/AS01G01757-RA/AS03G01244-RA/AS06G02683-RA/AS09G02285-RA/AS05G01265-RA/AS07G00753-RA/AS08G02690-RA/AS02G03629-RA/AS03G01242-RA/AS08G02130-RA/AS06G01396-RA/AS07G00653-RA/AS09G02533-RA/AS03G02744-RA/AS04G02923-RA/AS04G03186-RA/AS05G01780-RA/AS07G00050-RA/AS01G03569-RA/AS02G00325-RA/AS04G03022-RA/AS08G03718-RA/AS09G01686-RA/AS07G00337-RA/AS11G00957-RA/AS11G01946-RA/AS04G03…	71	0.0264727815063386
34	ko05145	Toxoplasmosis	87/2682	349/14627	0.00116769509657891	0.0131537418232271	0.00983322186592766	AS03G02955-RA/AS04G02788-RA/AS01G01757-RA/AS03G01244-RA/AS05G01659-RA/AS06G02683-RA/AS09G02285-RA/AS05G01265-RA/AS07G00753-RA/AS08G02690-RA/AS03G01242-RA/AS08G02130-RA/AS06G01396-RA/AS07G03345-RA/AS04G02130-RA/AS08G02881-RA/AS05G01911-RA/AS07G00653-RA/AS09G02533-RA/AS01G00427-RA/AS01G00426-RA/AS03G02744-RA/AS06G02396-RA/AS04G02487-RA/AS04G02923-RA/AS04G03186-RA/AS05G01780-RA/AS07G00050-RA/AS01G03…	87	0.0324384787472036
35	ko00941	Flavonoid biosynthesis	20/2682	56/14627	0.00153461390963652	0.016793060782594	0.0125538340878537	AS06G03794-RA/AS06G01888-RA/AS01G03632-RA/AS01G00430-RA/AS01G03056-RA/AS03G00437-RA/AS04G02158-RA/AS02G03269-RA/AS05G02773-RA/AS06G01910-RA/AS02G03271-RA/AS05G02154-RA/AS01G00004-RA/AS10G01761-RA/AS06G01889-RA/AS08G02081-RA/AS04G01763-RA/AS05G03599-RA/AS04G02159-RA/AS05G01288-RA	20	0.00745712155108128
36	ko05206	MicroRNAs in cancer	32/2682	106/14627	0.00203349317506663	0.0216341079458477	0.0161728112169042	AS08G02302-RA/AS02G01323-RA/AS04G02074-RA/AS03G02304-RA/AS07G03458-RA/AS05G03479-RA/AS01G03654-RA/AS08G02881-RA/AS11G02111-RA/AS08G03753-RA/AS02G00117-RA/AS04G01279-RA/AS11G02192-RA/AS07G01023-RA/AS06G01216-RA/AS01G02780-RA/AS01G02586-RA/AS05G02938-RA/AS02G03117-RA/AS02G03234-RA/AS09G02768-RA/AS06G00201-RA/AS08G02283-RA/AS04G01006-RA/AS07G02318-RA/AS11G02515-RA/AS06G02731-RA/AS02G01758-RA/AS09G00…	32	0.0119313944817301
37	ko05142	Chagas disease	72/2682	286/14627	0.00225878803385602	0.0233815085666718	0.0174790994369513	AS03G02955-RA/AS07G01156-RA/AS04G02788-RA/AS01G01757-RA/AS03G01244-RA/AS06G02683-RA/AS05G01265-RA/AS07G00753-RA/AS08G02690-RA/AS03G01242-RA/AS08G02130-RA/AS06G01396-RA/AS08G02881-RA/AS07G00653-RA/AS09G02533-RA/AS03G02744-RA/AS04G02923-RA/AS04G03186-RA/AS05G01780-RA/AS07G00050-RA/AS01G03569-RA/AS02G00325-RA/AS04G03022-RA/AS08G03718-RA/AS09G01686-RA/AS07G00337-RA/AS11G00957-RA/AS11G01946-RA/AS04G03…	72	0.0268456375838926
38	ko04976	Bile secretion	21/2682	62/14627	0.00252186377703103	0.0254177322790232	0.019001300480677	AS08G02302-RA/AS02G01323-RA/AS03G02304-RA/AS01G03255-RA/AS04G00151-RA/AS08G03753-RA/AS04G01279-RA/AS07G01023-RA/AS02G03117-RA/AS02G03234-RA/AS09G02768-RA/AS08G02283-RA/AS05G01973-RA/AS01G02345-RA/AS11G02515-RA/AS11G01724-RA/AS06G02731-RA/AS08G00917-RA/AS06G00772-RA/AS01G02417-RA/AS06G02177-RA	21	0.00782997762863535
39	ko05152	Tuberculosis	101/2682	426/14627	0.0028337847289005	0.0278292192607408	0.0208040336372722	AS07G00034-RA/AS03G02955-RA/AS04G02788-RA/AS01G01757-RA/AS03G01244-RA/AS06G02683-RA/AS08G03327-RA/AS04G03481-RA/AS05G01265-RA/AS09G01370-RA/AS07G03324-RA/AS09G02405-RA/AS07G00753-RA/AS08G02690-RA/AS03G01242-RA/AS05G02748-RA/AS08G02130-RA/AS08G03862-RA/AS06G01396-RA/AS02G00646-RA/AS08G02881-RA/AS08G01217-RA/AS05G02951-RA/AS07G03112-RA/AS07G00653-RA/AS09G02533-RA/AS03G02744-RA/AS02G03684-RA/AS04G02…	101	0.0376584638329605
40	ko04814	Motor proteins	41/2682	148/14627	0.00320660525267382	0.0307032452943518	0.0229525428612442	AS01G03215-RA/AS04G00055-RA/AS10G00350-RA/AS06G01030-RA/AS02G03159-RA/AS04G03104-RA/AS07G01716-RA/AS04G02502-RA/AS01G00532-RA/AS05G00624-RA/AS01G00133-RA/AS02G02423-RA/AS04G02432-RA/AS09G00728-RA/AS08G04018-RA/AS04G02101-RA/AS05G00566-RA/AS04G03106-RA/AS08G03044-RA/AS01G00050-RA/AS02G00695-RA/AS01G01806-RA/AS07G01478-RA/AS04G01543-RA/AS03G00064-RA/AS07G02994-RA/AS03G01883-RA/AS10G02450-RA/AS02G03…	41	0.0152870991797166
41	ko05130	Pathogenic Escherichia coli infection	95/2682	401/14627	0.00379610582336116	0.0354611836670079	0.0265093911156415	AS01G03215-RA/AS08G02942-RA/AS03G02955-RA/AS06G01030-RA/AS04G02788-RA/AS01G01757-RA/AS04G03104-RA/AS03G01244-RA/AS03G01023-RA/AS06G02683-RA/AS09G02285-RA/AS05G01265-RA/AS07G03374-RA/AS04G01744-RA/AS04G02432-RA/AS07G00753-RA/AS08G02690-RA/AS03G01242-RA/AS08G02130-RA/AS06G01396-RA/AS08G02881-RA/AS05G00394-RA/AS10G00436-RA/AS07G00653-RA/AS09G02533-RA/AS03G02744-RA/AS07G01478-RA/AS04G02923-RA/AS04G03…	95	0.0354213273676361
42	ko05132	Salmonella infection	108/2682	465/14627	0.00413478145558652	0.0377052689878485	0.0281869813513668	AS04G00055-RA/AS03G02955-RA/AS06G01030-RA/AS04G02788-RA/AS01G01757-RA/AS03G01244-RA/AS08G03280-RA/AS03G01023-RA/AS06G02683-RA/AS09G02285-RA/AS05G00616-RA/AS07G03237-RA/AS05G01265-RA/AS07G03374-RA/AS05G00440-RA/AS05G03275-RA/AS07G00753-RA/AS08G02690-RA/AS03G01242-RA/AS07G02395-RA/AS04G03533-RA/AS04G03106-RA/AS08G02130-RA/AS06G01396-RA/AS08G02881-RA/AS06G00613-RA/AS06G00066-RA/AS05G00394-RA/AS10G00…	108	0.0402684563758389
43	ko04380	Osteoclast differentiation	15/2682	41/14627	0.00441858612709481	0.0393562438762166	0.0294211854729446	AS03G01023-RA/AS09G02285-RA/AS03G02644-RA/AS04G03481-RA/AS07G03374-RA/AS08G02881-RA/AS05G00394-RA/AS11G02192-RA/AS07G02772-RA/AS06G00686-RA/AS11G00720-RA/AS05G01711-RA/AS04G03482-RA/AS04G00637-RA/AS02G01095-RA	15	0.00559284116331096
44	ko00592	alpha-Linolenic acid metabolism	22/2682	69/14627	0.00468239104421033	0.0407580856802854	0.030469147464718	AS05G01617-RA/AS03G00438-RA/AS07G00155-RA/AS06G01032-RA/AS05G03160-RA/AS03G02140-RA/AS03G00763-RA/AS08G00291-RA/AS05G01632-RA/AS10G02326-RA/AS05G03781-RA/AS05G02096-RA/AS05G01855-RA/AS10G02484-RA/AS02G02524-RA/AS07G03649-RA/AS10G00432-RA/AS07G02281-RA/AS10G02325-RA/AS10G00668-RA/AS01G01440-RA/AS05G01630-RA	22	0.00820283370618941
45	ko00982	Drug metabolism - cytochrome P450	20/2682	61/14627	0.00481464242273663	0.0409779566201806	0.0306335143622073	AS03G02967-RA/AS03G03071-RA/AS01G00731-RA/AS03G00438-RA/AS04G02369-RA/AS06G01032-RA/AS04G02112-RA/AS11G02355-RA/AS11G00869-RA/AS03G02968-RA/AS05G02096-RA/AS05G01748-RA/AS04G03468-RA/AS03G00141-RA/AS09G00774-RA/AS03G00142-RA/AS11G00868-RA/AS01G02713-RA/AS07G01160-RA/AS11G00382-RA	20	0.00745712155108128
46	ko05418	Fluid shear stress and atherosclerosis	57/2682	225/14627	0.00528598772664851	0.0427130059211898	0.0319305692196334	AS03G02967-RA/AS05G01802-RA/AS01G00731-RA/AS04G00977-RA/AS03G01023-RA/AS02G03288-RA/AS09G02285-RA/AS06G01179-RA/AS05G00616-RA/AS07G03237-RA/AS08G00293-RA/AS07G03374-RA/AS08G01809-RA/AS05G00440-RA/AS01G03106-RA/AS05G03275-RA/AS07G03324-RA/AS04G03533-RA/AS04G00483-RA/AS01G01054-RA/AS11G02355-RA/AS06G00066-RA/AS05G00394-RA/AS01G02283-RA/AS08G00393-RA/AS02G02759-RA/AS06G03256-RA/AS06G00921-RA/AS04G01…	57	0.0212527964205817
47	ko05200	Pathways in cancer	55/2682	216/14627	0.00542823605233193	0.0427130059211898	0.0319305692196334	AS11G02527-RA/AS03G02967-RA/AS08G03280-RA/AS01G00731-RA/AS03G01023-RA/AS05G00616-RA/AS07G03374-RA/AS01G02742-RA/AS06G03727-RA/AS07G03324-RA/AS09G00050-RA/AS07G02395-RA/AS04G03533-RA/AS11G02355-RA/AS08G02881-RA/AS06G00613-RA/AS08G03271-RA/AS11G02060-RA/AS05G00394-RA/AS01G02283-RA/AS11G02192-RA/AS06G03256-RA/AS04G01789-RA/AS06G01216-RA/AS01G02586-RA/AS05G02938-RA/AS03G02968-RA/AS08G02087-RA/AS09G00…	55	0.0205070842654735
48	ko00966	Glucosinolate biosynthesis	14/2682	38/14627	0.00546627645995106	0.0427130059211898	0.0319305692196334	AS06G02568-RA/AS05G01994-RA/AS06G00328-RA/AS03G01841-RA/AS08G00200-RA/AS01G03823-RA/AS01G03077-RA/AS03G00837-RA/AS02G01008-RA/AS01G03824-RA/AS05G02015-RA/AS09G00207-RA/AS05G01989-RA/AS03G00669-RA	14	0.0052199850857569
49	ko05218	Melanoma	9/2682	20/14627	0.00550932204817159	0.0427130059211898	0.0319305692196334	AS06G03727-RA/AS08G02881-RA/AS08G03271-RA/AS11G02192-RA/AS06G01216-RA/AS01G02586-RA/AS05G02938-RA/AS02G01758-RA/AS04G00859-RA	9	0.00335570469798658
50	ko04977	Vitamin digestion and absorption	11/2682	27/14627	0.00557611043357569	0.0427130059211898	0.0319305692196334	AS07G03373-RA/AS03G02304-RA/AS03G02954-RA/AS04G00363-RA/AS09G02255-RA/AS08G03753-RA/AS07G01023-RA/AS02G03117-RA/AS09G02087-RA/AS08G03618-RA/AS04G02983-RA	11	0.00410141685309471
51	ko04015	Rap1 signaling pathway	16/2682	46/14627	0.0058957777389595	0.0434246706542594	0.03246258188253	AS03G01023-RA/AS07G03374-RA/AS07G03324-RA/AS08G02881-RA/AS08G03271-RA/AS05G00394-RA/AS11G02192-RA/AS06G03256-RA/AS04G01789-RA/AS11G00720-RA/AS08G03425-RA/AS05G00001-RA/AS10G00413-RA/AS07G00952-RA/AS07G00694-RA/AS11G00229-RA	16	0.00596569724086503
52	ko05214	Glioma	16/2682	46/14627	0.0058957777389595	0.0434246706542594	0.03246258188253	AS06G03727-RA/AS07G03324-RA/AS08G02881-RA/AS08G03271-RA/AS11G02192-RA/AS06G03256-RA/AS04G01789-RA/AS05G02911-RA/AS06G01216-RA/AS01G02586-RA/AS05G02938-RA/AS10G00413-RA/AS07G00952-RA/AS02G01758-RA/AS04G00859-RA/AS11G00229-RA	16	0.00596569724086503
53	ko05163	Human cytomegalovirus infection	24/2682	79/14627	0.00637886480304151	0.0460963248974509	0.0344598058873345	AS11G02527-RA/AS03G01023-RA/AS04G03481-RA/AS07G03374-RA/AS07G03324-RA/AS08G02881-RA/AS05G00394-RA/AS11G02192-RA/AS06G03256-RA/AS04G01789-RA/AS06G01216-RA/AS01G02586-RA/AS05G02938-RA/AS07G02772-RA/AS06G00686-RA/AS11G00720-RA/AS05G01711-RA/AS01G02675-RA/AS08G03425-RA/AS05G00001-RA/AS04G03482-RA/AS10G00413-RA/AS07G00952-RA/AS11G00229-RA	24	0.00894854586129754

## Sheet: DEGs-A10vsA7 （GO）
No.	Category	ID	term	Genes	adj_pvalue
1	BP	GO:0010200	response to chitin	AS11G01447-RA,AS01G03495-RA,AS05G02760-RA,AS08G00595-RA,AS02G00111-RA,AS05G00330-RA,AS03G01743-RA,AS05G02093-RA,AS06G03735-RA,AS02G03561-RA,AS07G00478-RA,AS01G02144-RA,AS02G00605-RA,AS01G01793-RA,AS08G00834-RA,AS02G02444-RA,AS11G01952-RA,AS01G00115-RA,AS08G01864-RA,AS10G00370-RA,AS08G01016-RA,AS05G00247-RA,AS03G00048-RA,AS11G01588-RA,AS01G01194-RA,AS02G03252-RA,AS04G01932-RA,AS02G03728-RA,AS04G00…	4.67970740263303e-13
2	BP	GO:0009414	response to water deprivation	AS06G03348-RA,AS01G03382-RA,AS03G02304-RA,AS07G02652-RA,AS02G00057-RA,AS04G02266-RA,AS05G03112-RA,AS02G00021-RA,AS06G03290-RA,AS05G00633-RA,AS08G03419-RA,AS08G00702-RA,AS07G02471-RA,AS03G00884-RA,AS02G00313-RA,AS04G02269-RA,AS06G00643-RA,AS02G01943-RA,AS05G02626-RA,AS05G01842-RA,AS04G01364-RA,AS10G02762-RA,AS02G03148-RA,AS07G03088-RA,AS05G00330-RA,AS03G01743-RA,AS05G02093-RA,AS02G00963-RA,AS06G03…	5.43506451022384e-10
3	BP	GO:0009415	response to water	AS06G03348-RA,AS01G03382-RA,AS03G02304-RA,AS07G02652-RA,AS02G00057-RA,AS04G02266-RA,AS05G03112-RA,AS02G00021-RA,AS06G03290-RA,AS05G00633-RA,AS08G03419-RA,AS08G00702-RA,AS07G02471-RA,AS03G00884-RA,AS02G00313-RA,AS04G02269-RA,AS06G00643-RA,AS02G01943-RA,AS05G02626-RA,AS05G01842-RA,AS04G01364-RA,AS10G02762-RA,AS02G03148-RA,AS07G03088-RA,AS05G00330-RA,AS03G01743-RA,AS05G02093-RA,AS02G00963-RA,AS06G03…	6.65010705770724e-10
4	CC	GO:0031226	intrinsic component of plasma membrane	AS02G02347-RA,AS08G02948-RA,AS10G01414-RA,AS10G00067-RA,AS08G02807-RA,AS10G00222-RA,AS04G00243-RA,AS05G03526-RA,AS02G00313-RA,AS01G00070-RA,AS07G03399-RA,AS09G00741-RA,AS02G03807-RA,AS01G02148-RA,AS01G03108-RA,AS09G00104-RA,AS02G02965-RA,AS07G03048-RA,AS04G03253-RA,AS05G00589-RA,AS11G00716-RA,AS02G01556-RA,AS07G02278-RA,AS04G01346-RA,AS01G03600-RA,AS02G02980-RA,AS10G02926-RA,AS07G00695-RA,AS02G03…	9.42203510305958e-09
5	BP	GO:0010243	response to organonitrogen compound	AS11G01447-RA,AS01G03495-RA,AS05G02760-RA,AS06G00700-RA,AS08G00595-RA,AS02G00111-RA,AS06G03379-RA,AS08G02333-RA,AS05G00330-RA,AS03G01743-RA,AS05G02093-RA,AS06G03735-RA,AS02G02275-RA,AS08G00475-RA,AS02G03561-RA,AS03G01878-RA,AS04G00078-RA,AS07G00478-RA,AS01G02144-RA,AS10G00790-RA,AS02G00605-RA,AS01G01793-RA,AS08G00834-RA,AS02G02444-RA,AS11G01952-RA,AS01G00115-RA,AS08G01864-RA,AS10G00370-RA,AS08G01…	5.20199537809045e-08
6	BP	GO:0019748	secondary metabolic process	AS05G01212-RA,AS08G02096-RA,AS08G00192-RA,AS04G02266-RA,AS01G03593-RA,AS04G03593-RA,AS11G02242-RA,AS01G03357-RA,AS09G00043-RA,AS09G00633-RA,AS01G02476-RA,AS04G02269-RA,AS01G03608-RA,AS01G03356-RA,AS08G02080-RA,AS11G02355-RA,AS05G03599-RA,AS02G02773-RA,AS06G02552-RA,AS06G03766-RA,AS05G00657-RA,AS02G02948-RA,AS04G01453-RA,AS08G03457-RA,AS05G02988-RA,AS10G01761-RA,AS02G00410-RA,AS09G00215-RA,AS07G02…	6.180896219951e-08
7	CC	GO:0005887	integral component of plasma membrane	AS08G02948-RA,AS10G01414-RA,AS10G00067-RA,AS04G00243-RA,AS05G03526-RA,AS02G00313-RA,AS07G03399-RA,AS02G03807-RA,AS01G03108-RA,AS09G00104-RA,AS02G02965-RA,AS04G01346-RA,AS01G03600-RA,AS02G02980-RA,AS10G02926-RA,AS02G03783-RA,AS06G02764-RA,AS07G03489-RA,AS10G02706-RA,AS10G00111-RA,AS03G02737-RA,AS08G00556-RA,AS01G00169-RA,AS10G00435-RA,AS08G00555-RA,AS03G02859-RA,AS08G03863-RA,AS08G01775-RA,AS02G02…	2.64850547271548e-06
8	MF	GO:0004675	transmembrane receptor protein serine/threonine kinase activity	AS03G02955-RA,AS06G01071-RA,AS08G03286-RA,AS02G03052-RA,AS02G02484-RA,AS07G00934-RA,AS01G02199-RA,AS07G00571-RA,AS01G02459-RA,AS04G01628-RA,AS09G01686-RA,AS07G01299-RA,AS08G01535-RA,AS05G00247-RA,AS10G00445-RA,AS06G02450-RA,AS04G00613-RA,AS02G02753-RA,AS10G02112-RA,AS07G03648-RA,AS01G03549-RA,AS04G02817-RA,AS08G02796-RA,AS11G02236-RA,AS03G02458-RA,AS03G02809-RA,AS03G00097-RA,AS05G00752-RA,AS07G03…	1.23295486810442e-05
9	MF	GO:0019199	transmembrane receptor protein kinase activity	AS03G02955-RA,AS06G01071-RA,AS08G03286-RA,AS02G03052-RA,AS02G02484-RA,AS07G00934-RA,AS01G02199-RA,AS07G00571-RA,AS01G02459-RA,AS04G01628-RA,AS09G01686-RA,AS07G01299-RA,AS08G01535-RA,AS01G03340-RA,AS05G00247-RA,AS10G00445-RA,AS06G02450-RA,AS04G00613-RA,AS02G02753-RA,AS10G02112-RA,AS07G03648-RA,AS01G03549-RA,AS04G02817-RA,AS08G02796-RA,AS11G02236-RA,AS03G02458-RA,AS03G02809-RA,AS03G00097-RA,AS05G00…	1.23295486810442e-05
10	BP	GO:0044550	secondary metabolite biosynthetic process	AS05G01212-RA,AS08G02096-RA,AS08G00192-RA,AS01G03593-RA,AS04G03593-RA,AS11G02242-RA,AS09G00043-RA,AS09G00633-RA,AS01G02476-RA,AS01G03608-RA,AS05G03599-RA,AS06G02552-RA,AS06G03766-RA,AS05G00657-RA,AS02G02948-RA,AS04G01453-RA,AS08G03457-RA,AS05G02988-RA,AS10G01761-RA,AS02G00410-RA,AS09G00215-RA,AS07G02833-RA,AS04G00078-RA,AS09G00734-RA,AS03G00649-RA,AS05G03210-RA,AS11G01716-RA,AS06G01052-RA,AS06G02…	1.62157826864094e-05
11	BP	GO:0007178	transmembrane receptor protein serine/threonine kinase signaling pathway	AS03G02955-RA,AS04G00646-RA,AS06G01071-RA,AS08G03286-RA,AS02G03052-RA,AS02G02484-RA,AS07G00934-RA,AS01G02199-RA,AS07G00571-RA,AS01G02459-RA,AS04G01628-RA,AS09G01686-RA,AS07G01299-RA,AS08G01535-RA,AS05G00247-RA,AS10G00445-RA,AS06G02450-RA,AS04G00613-RA,AS02G02753-RA,AS10G02112-RA,AS07G03648-RA,AS01G03549-RA,AS04G02817-RA,AS08G02796-RA,AS11G02236-RA,AS03G02458-RA,AS03G02809-RA,AS03G00097-RA,AS05G00…	3.17041331872743e-05
12	MF	GO:0004888	transmembrane signaling receptor activity	AS03G02955-RA,AS06G01071-RA,AS08G03286-RA,AS06G03379-RA,AS02G03052-RA,AS02G02484-RA,AS07G00934-RA,AS08G00306-RA,AS01G02199-RA,AS07G00571-RA,AS01G02459-RA,AS04G01628-RA,AS09G01686-RA,AS07G01299-RA,AS08G01535-RA,AS01G03340-RA,AS05G00247-RA,AS10G00445-RA,AS06G02450-RA,AS04G00613-RA,AS02G02753-RA,AS10G02112-RA,AS07G03648-RA,AS01G03549-RA,AS04G02817-RA,AS08G02796-RA,AS11G02236-RA,AS03G02458-RA,AS03G02…	0.000113169766586739
13	MF	GO:0038023	signaling receptor activity	AS03G02955-RA,AS07G02471-RA,AS06G01071-RA,AS08G03286-RA,AS06G03379-RA,AS02G03052-RA,AS02G02484-RA,AS07G00934-RA,AS08G00306-RA,AS01G02199-RA,AS07G00571-RA,AS01G02459-RA,AS10G02794-RA,AS04G01628-RA,AS09G01686-RA,AS07G01299-RA,AS08G01535-RA,AS01G03340-RA,AS05G00247-RA,AS10G00535-RA,AS10G00445-RA,AS06G02450-RA,AS05G00082-RA,AS05G00462-RA,AS04G00613-RA,AS02G02753-RA,AS10G02112-RA,AS07G03648-RA,AS01G03…	0.000145856953602635
14	BP	GO:0006820	anion transport	AS04G01032-RA,AS02G00896-RA,AS10G01414-RA,AS04G03084-RA,AS04G02749-RA,AS06G02141-RA,AS03G02800-RA,AS09G01065-RA,AS01G02472-RA,AS05G00633-RA,AS07G02756-RA,AS08G00702-RA,AS09G03031-RA,AS11G00783-RA,AS05G00054-RA,AS08G03272-RA,AS06G00643-RA,AS03G02281-RA,AS03G01421-RA,AS09G03034-RA,AS08G00162-RA,AS05G00397-RA,AS08G01185-RA,AS09G00443-RA,AS01G01402-RA,AS07G03532-RA,AS06G00852-RA,AS09G01955-RA,AS10G00…	0.000150041847080983
15	BP	GO:1901698	response to nitrogen compound	AS04G01032-RA,AS11G01447-RA,AS01G03495-RA,AS04G03487-RA,AS05G02760-RA,AS06G00700-RA,AS09G01065-RA,AS08G00702-RA,AS08G00595-RA,AS02G00111-RA,AS06G03379-RA,AS08G02333-RA,AS05G00330-RA,AS03G01743-RA,AS05G02093-RA,AS06G03735-RA,AS02G02275-RA,AS01G02770-RA,AS05G03091-RA,AS10G00837-RA,AS03G02124-RA,AS08G00475-RA,AS02G03561-RA,AS03G01878-RA,AS04G00078-RA,AS07G00478-RA,AS01G02144-RA,AS10G00790-RA,AS01G01…	0.000156138769895183
16	BP	GO:0009699	phenylpropanoid biosynthetic process	AS05G01212-RA,AS08G00192-RA,AS01G03593-RA,AS11G02242-RA,AS09G00633-RA,AS01G02476-RA,AS06G02552-RA,AS06G03766-RA,AS05G00657-RA,AS08G03457-RA,AS10G01761-RA,AS07G02833-RA,AS04G00078-RA,AS09G00734-RA,AS05G03210-RA,AS06G01052-RA,AS06G02531-RA,AS05G03296-RA,AS06G03906-RA,AS07G02473-RA,AS01G03183-RA,AS01G03615-RA,AS06G03538-RA,AS11G00901-RA,AS06G01386-RA,AS06G00321-RA,AS08G00542-RA,AS01G01864-RA,AS07G02…	0.000158208215338422
17	BP	GO:0098656	anion transmembrane transport	AS04G01032-RA,AS02G00896-RA,AS10G01414-RA,AS04G02749-RA,AS06G02141-RA,AS09G01065-RA,AS01G02472-RA,AS05G00633-RA,AS07G02756-RA,AS08G00702-RA,AS09G03031-RA,AS11G00783-RA,AS05G00054-RA,AS06G00643-RA,AS03G02281-RA,AS03G01421-RA,AS09G03034-RA,AS08G00162-RA,AS08G01185-RA,AS09G00443-RA,AS01G01402-RA,AS06G00852-RA,AS10G00735-RA,AS01G01324-RA,AS10G02794-RA,AS09G00630-RA,AS02G02980-RA,AS08G01535-RA,AS04G03…	0.000183314418573803
18	BP	GO:0009698	phenylpropanoid metabolic process	AS05G01212-RA,AS08G00192-RA,AS01G03593-RA,AS11G02242-RA,AS09G00633-RA,AS01G02476-RA,AS02G02773-RA,AS06G02552-RA,AS06G03766-RA,AS05G00657-RA,AS08G03457-RA,AS10G01761-RA,AS07G02833-RA,AS04G00078-RA,AS09G00734-RA,AS05G03210-RA,AS06G01052-RA,AS06G02531-RA,AS05G03296-RA,AS06G03906-RA,AS07G02473-RA,AS01G03183-RA,AS01G03615-RA,AS06G03538-RA,AS11G00901-RA,AS06G01386-RA,AS06G00321-RA,AS08G00542-RA,AS01G01…	0.000194234342434299
19	CC	GO:0009505	plant-type cell wall	AS02G02347-RA,AS04G00569-RA,AS03G02592-RA,AS06G01027-RA,AS08G02130-RA,AS08G03009-RA,AS03G00007-RA,AS09G00633-RA,AS01G00070-RA,AS04G03610-RA,AS11G02587-RA,AS10G00849-RA,AS04G02056-RA,AS06G03472-RA,AS06G01781-RA,AS06G03230-RA,AS08G00705-RA,AS11G02137-RA,AS08G00257-RA,AS01G00651-RA,AS04G03253-RA,AS09G00319-RA,AS06G01907-RA,AS01G00035-RA,AS07G02848-RA,AS05G01444-RA,AS08G02587-RA,AS06G00218-RA,AS09G01…	0.000219546749076515
20	MF	GO:0030246	carbohydrate binding	AS02G02347-RA,AS06G00025-RA,AS08G02807-RA,AS01G00070-RA,AS09G00741-RA,AS05G01042-RA,AS07G03048-RA,AS02G03764-RA,AS06G01513-RA,AS07G00695-RA,AS02G01865-RA,AS04G02739-RA,AS05G03630-RA,AS08G01260-RA,AS05G02342-RA,AS05G00235-RA,AS06G03453-RA,AS07G03513-RA,AS05G03646-RA,AS08G00356-RA,AS04G02308-RA,AS04G03498-RA,AS06G00073-RA,AS01G03375-RA,AS01G01002-RA,AS07G00781-RA,AS01G00029-RA,AS02G00792-RA,AS10G02…	0.000271581273193241
21	BP	GO:0007167	enzyme linked receptor protein signaling pathway	AS03G02955-RA,AS04G00646-RA,AS06G01071-RA,AS08G03286-RA,AS02G03052-RA,AS02G02484-RA,AS07G00934-RA,AS01G02199-RA,AS07G00571-RA,AS01G02459-RA,AS04G01628-RA,AS09G01686-RA,AS07G01299-RA,AS08G01535-RA,AS05G00247-RA,AS10G00445-RA,AS06G02450-RA,AS04G00613-RA,AS02G02753-RA,AS10G02112-RA,AS07G03648-RA,AS01G03549-RA,AS04G02817-RA,AS08G02796-RA,AS11G02236-RA,AS03G02458-RA,AS03G02809-RA,AS03G00097-RA,AS05G00…	0.000305489623215887
22	MF	GO:0060089	molecular transducer activity	AS03G02955-RA,AS07G02471-RA,AS06G01071-RA,AS08G03286-RA,AS06G03379-RA,AS02G03052-RA,AS02G02484-RA,AS07G00934-RA,AS08G00306-RA,AS07G03590-RA,AS01G02199-RA,AS07G00571-RA,AS01G02459-RA,AS10G02794-RA,AS04G01628-RA,AS09G01686-RA,AS07G01299-RA,AS08G01535-RA,AS01G03340-RA,AS05G00247-RA,AS10G00535-RA,AS10G00445-RA,AS06G02450-RA,AS05G00082-RA,AS05G00462-RA,AS04G00613-RA,AS02G02753-RA,AS10G02112-RA,AS07G03…	0.000405598128059134
23	BP	GO:0080167	response to karrikin	AS10G00067-RA,AS07G00342-RA,AS07G01446-RA,AS06G03766-RA,AS05G01456-RA,AS09G00311-RA,AS01G00115-RA,AS08G02587-RA,AS07G02769-RA,AS04G03445-RA,AS02G00798-RA,AS11G01951-RA,AS06G00808-RA,AS06G01271-RA,AS08G03863-RA,AS11G00772-RA,AS06G01070-RA,AS11G02376-RA,AS04G00431-RA,AS05G00078-RA,AS04G00469-RA,AS06G00410-RA,AS04G00474-RA,AS10G00664-RA,AS03G00354-RA,AS04G02907-RA,AS01G03580-RA,AS02G03666-RA,AS05G01…	0.000405598128059134
24	BP	GO:0009733	response to auxin	AS11G01447-RA,AS07G02930-RA,AS04G03593-RA,AS05G03526-RA,AS04G02779-RA,AS01G01823-RA,AS11G02355-RA,AS05G03599-RA,AS02G00319-RA,AS07G02479-RA,AS01G03108-RA,AS04G01097-RA,AS09G01808-RA,AS04G00842-RA,AS03G01743-RA,AS05G02093-RA,AS02G02275-RA,AS05G02940-RA,AS02G00659-RA,AS11G01197-RA,AS04G01221-RA,AS04G00078-RA,AS08G01699-RA,AS08G00214-RA,AS02G01323-RA,AS01G02945-RA,AS08G01573-RA,AS04G00746-RA,AS03G00…	0.00050699972494845
25	BP	GO:0003333	amino acid transmembrane transport	AS04G01032-RA,AS02G00896-RA,AS01G02472-RA,AS08G00162-RA,AS09G00443-RA,AS01G01402-RA,AS10G00735-RA,AS02G00798-RA,AS09G01080-RA,AS08G00556-RA,AS08G02207-RA,AS05G01082-RA,AS10G00774-RA,AS01G00299-RA,AS07G00771-RA,AS02G02233-RA,AS05G00133-RA,AS08G00850-RA,AS10G01511-RA,AS01G00507-RA,AS02G00331-RA,AS03G00501-RA,AS05G01326-RA,AS03G02772-RA,AS09G00475-RA,AS01G03662-RA,AS06G01002-RA,AS05G01948-RA,AS05G03…	0.000707124148889896
26	BP	GO:0006865	amino acid transport	AS04G01032-RA,AS02G00896-RA,AS01G02472-RA,AS08G00162-RA,AS09G00443-RA,AS01G01402-RA,AS10G00735-RA,AS02G00798-RA,AS09G01080-RA,AS08G00556-RA,AS08G02207-RA,AS05G01082-RA,AS10G00774-RA,AS01G00299-RA,AS07G00771-RA,AS02G02233-RA,AS05G00133-RA,AS08G00850-RA,AS10G01511-RA,AS01G00507-RA,AS02G00331-RA,AS03G00501-RA,AS05G01326-RA,AS03G02772-RA,AS09G00475-RA,AS01G03662-RA,AS06G01002-RA,AS05G01948-RA,AS05G03…	0.000707124148889896
27	BP	GO:0007166	cell surface receptor signaling pathway	AS03G02955-RA,AS04G00646-RA,AS06G01071-RA,AS08G03286-RA,AS02G03052-RA,AS02G02484-RA,AS05G02626-RA,AS07G00934-RA,AS01G02512-RA,AS01G02199-RA,AS05G02810-RA,AS07G00571-RA,AS01G02459-RA,AS04G01628-RA,AS09G01686-RA,AS07G01299-RA,AS08G01535-RA,AS05G00247-RA,AS10G00445-RA,AS06G02450-RA,AS04G00613-RA,AS02G02753-RA,AS10G02112-RA,AS07G03648-RA,AS01G03549-RA,AS04G02817-RA,AS08G02796-RA,AS11G02236-RA,AS03G02…	0.000707124148889896
28	MF	GO:0015171	amino acid transmembrane transporter activity	AS04G01032-RA,AS02G00896-RA,AS01G02472-RA,AS08G00162-RA,AS09G00443-RA,AS01G01402-RA,AS10G00735-RA,AS02G00798-RA,AS09G01080-RA,AS08G00556-RA,AS08G02207-RA,AS05G01082-RA,AS10G00774-RA,AS01G00299-RA,AS07G00771-RA,AS02G02233-RA,AS05G00133-RA,AS08G00850-RA,AS10G01511-RA,AS01G00507-RA,AS02G00331-RA,AS03G00501-RA,AS05G01326-RA,AS03G02772-RA,AS09G00475-RA,AS01G03662-RA,AS06G01002-RA,AS05G01948-RA,AS05G03…	0.000707124148889896
29	MF	GO:0016705	oxidoreductase activity, acting on paired donors, with incorporation or reduction of molecular oxygen	AS08G02096-RA,AS09G00043-RA,AS03G00485-RA,AS05G03599-RA,AS03G02434-RA,AS02G03209-RA,AS02G02948-RA,AS04G01453-RA,AS04G00162-RA,AS03G00755-RA,AS02G00410-RA,AS09G00215-RA,AS03G00649-RA,AS10G00532-RA,AS11G01716-RA,AS06G01052-RA,AS07G03224-RA,AS01G01959-RA,AS03G00488-RA,AS07G01900-RA,AS01G03184-RA,AS07G01482-RA,AS03G00648-RA,AS07G02455-RA,AS02G01497-RA,AS06G00509-RA,AS05G01898-RA,AS03G00440-RA,AS01G03…	0.000707124148889896
30	MF	GO:0001067	transcription regulatory region nucleic acid binding	AS10G02880-RA,AS07G02930-RA,AS05G02760-RA,AS07G02566-RA,AS01G03357-RA,AS03G02776-RA,AS01G03356-RA,AS08G02080-RA,AS04G01893-RA,AS05G02209-RA,AS01G02000-RA,AS05G00397-RA,AS07G00650-RA,AS07G01052-RA,AS03G01743-RA,AS05G02093-RA,AS03G00710-RA,AS06G03735-RA,AS04G02699-RA,AS02G00953-RA,AS05G02940-RA,AS05G00506-RA,AS04G03119-RA,AS08G00494-RA,AS02G03561-RA,AS03G02371-RA,AS09G01823-RA,AS02G01604-RA,AS02G00…	0.00072987034999396
31	MF	GO:0016682	oxidoreductase activity, acting on diphenols and related substances as donors, oxygen as acceptor	AS09G00433-RA,AS03G00421-RA,AS05G03368-RA,AS07G01446-RA,AS01G02456-RA,AS02G02642-RA,AS10G00664-RA,AS03G01455-RA,AS07G00193-RA,AS05G03687-RA	0.00090408114793409
32	BP	GO:0043090	amino acid import	AS02G00798-RA,AS05G01082-RA,AS05G00133-RA,AS01G00507-RA,AS03G00501-RA,AS09G00475-RA,AS01G03662-RA,AS05G03476-RA,AS05G01171-RA,AS05G03527-RA	0.00090408114793409
33	BP	GO:0044275	cellular carbohydrate catabolic process	AS03G01682-RA,AS07G02652-RA,AS06G02919-RA,AS08G02978-RA,AS05G01042-RA,AS10G01060-RA,AS06G03895-RA,AS04G03294-RA,AS03G02171-RA,AS03G00672-RA,AS03G01787-RA,AS01G00561-RA,AS07G02769-RA,AS04G03389-RA,AS04G02831-RA,AS05G01653-RA,AS05G02342-RA,AS09G01813-RA,AS07G03513-RA,AS02G02723-RA,AS01G01002-RA,AS08G02713-RA,AS03G01598-RA,AS08G00870-RA,AS10G02943-RA,AS10G01066-RA	0.000922213139247176
34	BP	GO:0009636	response to toxic substance	AS07G02398-RA,AS08G00192-RA,AS06G02919-RA,AS08G03009-RA,AS11G02355-RA,AS05G00459-RA,AS02G00053-RA,AS04G01097-RA,AS01G00651-RA,AS07G01831-RA,AS05G01456-RA,AS09G00311-RA,AS09G00319-RA,AS02G03561-RA,AS02G03735-RA,AS01G00035-RA,AS05G01444-RA,AS07G02769-RA,AS02G03783-RA,AS02G02607-RA,AS11G01071-RA,AS05G03296-RA,AS03G00476-RA,AS07G03192-RA,AS07G02640-RA,AS05G01863-RA,AS10G02600-RA,AS11G01951-RA,AS03G02…	0.000930791805579302
35	MF	GO:0046527	glucosyltransferase activity	AS08G00192-RA,AS03G01636-RA,AS08G02989-RA,AS07G02435-RA,AS02G03148-RA,AS08G02333-RA,AS01G02014-RA,AS02G01728-RA,AS04G02915-RA,AS07G00526-RA,AS10G02988-RA,AS01G00663-RA,AS05G00042-RA,AS04G02912-RA,AS07G02473-RA,AS02G03214-RA,AS01G02015-RA,AS08G03750-RA,AS06G02474-RA,AS04G01317-RA,AS10G01902-RA,AS03G02500-RA,AS06G01366-RA,AS06G00925-RA,AS03G00731-RA,AS08G00356-RA,AS03G00308-RA,AS01G01128-RA,AS03G02…	0.000930791805579302
36	MF	GO:0005342	organic acid transmembrane transporter activity	AS04G01032-RA,AS02G00896-RA,AS09G01065-RA,AS01G02472-RA,AS11G00783-RA,AS05G00054-RA,AS03G01421-RA,AS08G00162-RA,AS09G00443-RA,AS01G01402-RA,AS06G00852-RA,AS10G00735-RA,AS09G00630-RA,AS04G03322-RA,AS02G00798-RA,AS09G01080-RA,AS08G00556-RA,AS08G02207-RA,AS05G01082-RA,AS10G00774-RA,AS01G00299-RA,AS07G00771-RA,AS02G01856-RA,AS02G02233-RA,AS05G00133-RA,AS10G01481-RA,AS08G00850-RA,AS10G00812-RA,AS04G00…	0.00122165184583046
37	MF	GO:0046943	carboxylic acid transmembrane transporter activity	AS04G01032-RA,AS02G00896-RA,AS09G01065-RA,AS01G02472-RA,AS11G00783-RA,AS05G00054-RA,AS03G01421-RA,AS08G00162-RA,AS09G00443-RA,AS01G01402-RA,AS06G00852-RA,AS10G00735-RA,AS09G00630-RA,AS04G03322-RA,AS02G00798-RA,AS09G01080-RA,AS08G00556-RA,AS08G02207-RA,AS05G01082-RA,AS10G00774-RA,AS01G00299-RA,AS07G00771-RA,AS02G01856-RA,AS02G02233-RA,AS05G00133-RA,AS10G01481-RA,AS08G00850-RA,AS10G00812-RA,AS04G00…	0.00122165184583046
38	BP	GO:1903825	organic acid transmembrane transport	AS04G01032-RA,AS02G00896-RA,AS09G01065-RA,AS01G02472-RA,AS11G00783-RA,AS05G00054-RA,AS03G01421-RA,AS08G00162-RA,AS09G00443-RA,AS01G01402-RA,AS06G00852-RA,AS10G00735-RA,AS09G00630-RA,AS04G03322-RA,AS02G00798-RA,AS09G01080-RA,AS08G00556-RA,AS08G02207-RA,AS05G01082-RA,AS10G00774-RA,AS01G00299-RA,AS07G00771-RA,AS02G01856-RA,AS02G02233-RA,AS05G00133-RA,AS10G01481-RA,AS08G00850-RA,AS10G00812-RA,AS04G00…	0.00122165184583046
39	BP	GO:1905039	carboxylic acid transmembrane transport	AS04G01032-RA,AS02G00896-RA,AS09G01065-RA,AS01G02472-RA,AS11G00783-RA,AS05G00054-RA,AS03G01421-RA,AS08G00162-RA,AS09G00443-RA,AS01G01402-RA,AS06G00852-RA,AS10G00735-RA,AS09G00630-RA,AS04G03322-RA,AS02G00798-RA,AS09G01080-RA,AS08G00556-RA,AS08G02207-RA,AS05G01082-RA,AS10G00774-RA,AS01G00299-RA,AS07G00771-RA,AS02G01856-RA,AS02G02233-RA,AS05G00133-RA,AS10G01481-RA,AS08G00850-RA,AS10G00812-RA,AS04G00…	0.00122165184583046
40	MF	GO:0008509	anion transmembrane transporter activity	AS04G01032-RA,AS02G00896-RA,AS10G01414-RA,AS04G02749-RA,AS06G02141-RA,AS09G01065-RA,AS01G02472-RA,AS07G02756-RA,AS08G00702-RA,AS09G03031-RA,AS11G00783-RA,AS05G00054-RA,AS06G00643-RA,AS03G02281-RA,AS03G01421-RA,AS09G03034-RA,AS08G00162-RA,AS09G00443-RA,AS01G01402-RA,AS06G00852-RA,AS10G00735-RA,AS01G01324-RA,AS09G00630-RA,AS02G02980-RA,AS04G03322-RA,AS06G02642-RA,AS02G00798-RA,AS11G02057-RA,AS09G01…	0.00139836541910782
41	BP	GO:0016052	carbohydrate catabolic process	AS03G00193-RA,AS03G01682-RA,AS07G02652-RA,AS06G02919-RA,AS08G02978-RA,AS10G00011-RA,AS01G03749-RA,AS05G01042-RA,AS10G01060-RA,AS06G03895-RA,AS08G03796-RA,AS02G02884-RA,AS02G03587-RA,AS04G03294-RA,AS03G02171-RA,AS03G00672-RA,AS03G01787-RA,AS01G00561-RA,AS07G01597-RA,AS04G02764-RA,AS07G02769-RA,AS04G03389-RA,AS04G02831-RA,AS05G01653-RA,AS05G02342-RA,AS09G01813-RA,AS01G01346-RA,AS07G03513-RA,AS02G02…	0.00168428873973149
42	MF	GO:0035251	UDP-glucosyltransferase activity	AS08G00192-RA,AS03G01636-RA,AS08G02989-RA,AS07G02435-RA,AS02G03148-RA,AS08G02333-RA,AS01G02014-RA,AS02G01728-RA,AS04G02915-RA,AS07G00526-RA,AS10G02988-RA,AS05G00042-RA,AS04G02912-RA,AS07G02473-RA,AS02G03214-RA,AS01G02015-RA,AS08G03750-RA,AS06G02474-RA,AS04G01317-RA,AS10G01902-RA,AS03G02500-RA,AS06G01366-RA,AS06G00925-RA,AS03G00731-RA,AS08G00356-RA,AS03G00308-RA,AS01G01128-RA,AS03G02763-RA,AS05G03…	0.00168877167700865
43	BP	GO:0009611	response to wounding	AS02G00896-RA,AS03G02304-RA,AS03G01136-RA,AS05G01632-RA,AS10G00035-RA,AS06G03379-RA,AS04G02942-RA,AS02G00130-RA,AS04G01097-RA,AS01G03001-RA,AS04G00212-RA,AS09G00302-RA,AS03G01878-RA,AS08G00194-RA,AS09G00630-RA,AS09G00416-RA,AS08G00007-RA,AS08G02659-RA,AS07G02493-RA,AS05G03160-RA,AS06G00223-RA,AS07G03600-RA,AS04G03322-RA,AS04G02554-RA,AS07G03192-RA,AS05G00251-RA,AS03G01102-RA,AS05G00522-RA,AS06G03…	0.00193223492778786
44	MF	GO:0016679	oxidoreductase activity, acting on diphenols and related substances as donors	AS09G00433-RA,AS03G00421-RA,AS05G03368-RA,AS07G01446-RA,AS01G02456-RA,AS02G02642-RA,AS10G00664-RA,AS03G01455-RA,AS07G00193-RA,AS05G03687-RA	0.00193223492778786
45	BP	GO:0071365	cellular response to auxin stimulus	AS04G03593-RA,AS05G03526-RA,AS04G02779-RA,AS01G03108-RA,AS09G01808-RA,AS03G01743-RA,AS05G02093-RA,AS02G00659-RA,AS11G01197-RA,AS04G00078-RA,AS08G00214-RA,AS02G01323-RA,AS04G00746-RA,AS03G00266-RA,AS04G01346-RA,AS01G03600-RA,AS10G02336-RA,AS08G00901-RA,AS06G02623-RA,AS07G03192-RA,AS03G02705-RA,AS02G00201-RA,AS01G02059-RA,AS09G00722-RA,AS11G01487-RA,AS02G03234-RA,AS02G02233-RA,AS02G03264-RA,AS01G00…	0.00201948227463077
46	BP	GO:0009409	response to cold	AS06G01305-RA,AS06G03348-RA,AS02G00896-RA,AS02G00057-RA,AS04G02266-RA,AS05G03112-RA,AS04G02749-RA,AS06G02141-RA,AS06G03290-RA,AS08G03419-RA,AS07G02471-RA,AS03G00884-RA,AS05G00731-RA,AS04G02269-RA,AS05G03415-RA,AS03G01881-RA,AS06G02552-RA,AS05G01842-RA,AS10G02762-RA,AS10G01060-RA,AS05G03094-RA,AS01G00651-RA,AS05G01456-RA,AS09G00311-RA,AS06G00523-RA,AS07G00526-RA,AS07G00478-RA,AS04G02270-RA,AS06G02…	0.00256109035804985
47	BP	GO:0009808	lignin metabolic process	AS08G00192-RA,AS09G00633-RA,AS02G02773-RA,AS06G02552-RA,AS06G03766-RA,AS05G00657-RA,AS04G00078-RA,AS09G00734-RA,AS05G03210-RA,AS06G01052-RA,AS07G02473-RA,AS01G03183-RA,AS06G03538-RA,AS11G00901-RA,AS06G00321-RA,AS08G00542-RA,AS01G01864-RA,AS07G02794-RA,AS05G00277-RA,AS06G03499-RA,AS07G02808-RA,AS05G01557-RA,AS01G01031-RA,AS07G03229-RA,AS05G02312-RA,AS08G00466-RA	0.00259901927383936
48	BP	GO:0046942	carboxylic acid transport	AS04G01032-RA,AS02G00896-RA,AS09G01065-RA,AS01G02472-RA,AS11G00783-RA,AS05G00054-RA,AS03G01421-RA,AS08G00162-RA,AS09G00443-RA,AS01G01402-RA,AS07G03532-RA,AS06G00852-RA,AS10G00735-RA,AS09G00630-RA,AS04G03322-RA,AS02G00798-RA,AS09G01080-RA,AS08G00556-RA,AS08G02207-RA,AS05G01082-RA,AS10G00774-RA,AS01G00299-RA,AS07G00771-RA,AS02G01856-RA,AS02G02233-RA,AS05G00133-RA,AS10G01481-RA,AS08G00850-RA,AS10G00…	0.00388868510675888
49	BP	GO:0009620	response to fungus	AS05G00026-RA,AS08G01624-RA,AS01G03495-RA,AS05G01715-RA,AS01G03357-RA,AS01G03356-RA,AS08G02080-RA,AS06G03379-RA,AS08G00991-RA,AS02G00053-RA,AS05G01701-RA,AS10G01060-RA,AS06G03472-RA,AS03G01743-RA,AS05G02093-RA,AS08G00257-RA,AS05G00506-RA,AS07G02637-RA,AS04G00078-RA,AS07G00478-RA,AS08G00194-RA,AS08G02567-RA,AS01G00035-RA,AS11G01952-RA,AS08G02659-RA,AS04G00535-RA,AS09G02843-RA,AS05G01927-RA,AS03G00…	0.0041282412500012
50	MF	GO:0045485	omega-6 fatty acid desaturase activity	AS03G00485-RA,AS07G03224-RA,AS01G01959-RA,AS03G00488-RA,AS06G00509-RA,AS03G00440-RA,AS02G00133-RA,AS03G00486-RA,AS03G00487-RA,AS05G03644-RA,AS03G00439-RA,AS05G03645-RA,AS05G03643-RA,AS11G01807-RA,AS11G01812-RA	0.00421700737164207
51	BP	GO:0009753	response to jasmonic acid	AS02G02678-RA,AS02G00896-RA,AS01G03495-RA,AS08G00595-RA,AS10G00035-RA,AS06G03379-RA,AS03G01743-RA,AS05G02093-RA,AS04G00212-RA,AS03G02124-RA,AS07G03532-RA,AS03G01878-RA,AS02G00605-RA,AS08G00834-RA,AS04G02554-RA,AS07G03192-RA,AS06G03906-RA,AS01G01194-RA,AS03G01102-RA,AS11G01951-RA,AS02G00852-RA,AS07G01374-RA,AS02G03804-RA,AS05G02922-RA,AS04G00821-RA,AS08G01240-RA,AS07G01193-RA,AS08G00835-RA,AS04G00…	0.00523063044669
52	BP	GO:0015849	organic acid transport	AS04G01032-RA,AS02G00896-RA,AS09G01065-RA,AS01G02472-RA,AS11G00783-RA,AS05G00054-RA,AS03G01421-RA,AS08G00162-RA,AS09G00443-RA,AS01G01402-RA,AS07G03532-RA,AS06G00852-RA,AS10G00735-RA,AS09G00630-RA,AS04G03322-RA,AS02G00798-RA,AS09G01080-RA,AS08G00556-RA,AS08G02207-RA,AS05G01082-RA,AS10G00774-RA,AS01G00299-RA,AS07G00771-RA,AS02G01856-RA,AS02G02233-RA,AS05G00133-RA,AS10G01481-RA,AS08G00850-RA,AS10G00…	0.00523063044669
53	BP	GO:0048878	chemical homeostasis	AS05G03438-RA,AS02G01385-RA,AS07G02696-RA,AS04G03593-RA,AS09G01065-RA,AS05G00633-RA,AS07G03399-RA,AS06G00643-RA,AS07G00701-RA,AS07G00118-RA,AS05G00447-RA,AS04G02302-RA,AS08G01185-RA,AS04G00842-RA,AS08G02195-RA,AS06G02324-RA,AS04G00162-RA,AS07G02795-RA,AS07G01831-RA,AS01G03419-RA,AS09G00215-RA,AS09G01561-RA,AS02G01004-RA,AS05G03279-RA,AS02G00164-RA,AS10G02336-RA,AS07G03347-RA,AS05G00555-RA,AS05G00…	0.00523063044669
54	BP	GO:0001763	morphogenesis of a branching structure	AS10G00067-RA,AS01G00482-RA,AS04G02873-RA,AS04G03615-RA,AS01G01402-RA,AS01G00043-RA,AS04G00535-RA,AS01G01334-RA,AS11G01188-RA,AS08G02929-RA,AS05G02629-RA,AS06G02708-RA,AS04G02988-RA,AS07G01340-RA,AS05G01852-RA,AS09G03024-RA,AS06G00189-RA,AS04G01506-RA,AS09G00123-RA,AS10G02852-RA,AS11G01573-RA,AS05G00469-RA	0.00577926619387659
55	BP	GO:0009734	auxin-activated signaling pathway	AS04G03593-RA,AS05G03526-RA,AS04G02779-RA,AS01G03108-RA,AS09G01808-RA,AS03G01743-RA,AS05G02093-RA,AS02G00659-RA,AS11G01197-RA,AS08G00214-RA,AS02G01323-RA,AS04G00746-RA,AS03G00266-RA,AS04G01346-RA,AS01G03600-RA,AS10G02336-RA,AS06G02623-RA,AS07G03192-RA,AS03G02705-RA,AS01G02059-RA,AS09G00722-RA,AS11G01487-RA,AS02G03234-RA,AS02G02233-RA,AS02G03264-RA,AS01G00309-RA,AS06G02731-RA,AS07G01458-RA,AS08G02…	0.00577926619387659
56	BP	GO:0009768	photosynthesis, light harvesting in photosystem I	AS05G03579-RA,AS01G03040-RA,AS10G01176-RA,AS11G02428-RA,AS09G02198-RA,AS09G00108-RA,AS10G01920-RA,AS07G03326-RA,AS11G00231-RA,AS04G03596-RA,AS11G00119-RA,AS06G01935-RA	0.00577926619387659
57	BP	GO:0010089	xylem development	AS08G02088-RA,AS01G00482-RA,AS02G01402-RA,AS02G03287-RA,AS05G00657-RA,AS01G00047-RA,AS03G02124-RA,AS08G01987-RA,AS02G00201-RA,AS08G02921-RA,AS08G03800-RA,AS08G00735-RA,AS01G01966-RA,AS06G03499-RA,AS06G00017-RA,AS03G00690-RA,AS03G02131-RA,AS05G01661-RA,AS09G00189-RA,AS01G00703-RA,AS06G00034-RA,AS01G01903-RA,AS01G01891-RA,AS01G03423-RA	0.00577926619387659
58	BP	GO:0070542	response to fatty acid	AS02G02678-RA,AS02G00896-RA,AS01G03495-RA,AS08G00595-RA,AS10G00035-RA,AS06G03379-RA,AS03G01743-RA,AS05G02093-RA,AS04G00212-RA,AS03G02124-RA,AS07G03532-RA,AS03G01878-RA,AS02G00605-RA,AS08G00834-RA,AS04G02554-RA,AS07G03192-RA,AS06G03906-RA,AS01G01194-RA,AS01G00075-RA,AS03G01102-RA,AS11G01951-RA,AS02G00852-RA,AS07G01374-RA,AS02G03804-RA,AS05G02922-RA,AS04G00821-RA,AS08G01240-RA,AS07G01193-RA,AS08G00…	0.00577926619387659
59	BP	GO:0048646	anatomical structure formation involved in morphogenesis	AS10G00067-RA,AS04G03084-RA,AS01G03593-RA,AS01G00482-RA,AS08G01008-RA,AS03G00311-RA,AS04G02873-RA,AS04G03615-RA,AS06G03588-RA,AS05G02911-RA,AS02G01379-RA,AS06G03472-RA,AS06G00080-RA,AS01G01402-RA,AS04G02221-RA,AS11G01039-RA,AS01G00043-RA,AS02G02941-RA,AS01G02902-RA,AS06G02449-RA,AS01G03797-RA,AS07G03359-RA,AS08G01987-RA,AS03G01718-RA,AS04G00535-RA,AS01G03340-RA,AS08G03415-RA,AS02G01462-RA,AS01G02…	0.00631106771052661
60	BP	GO:0009991	response to extracellular stimulus	AS10G01414-RA,AS02G00057-RA,AS04G00646-RA,AS09G01065-RA,AS08G03419-RA,AS01G03155-RA,AS02G03562-RA,AS03G00884-RA,AS11G00774-RA,AS07G01446-RA,AS05G03415-RA,AS08G02493-RA,AS05G02011-RA,AS05G02626-RA,AS05G00397-RA,AS08G01185-RA,AS07G01052-RA,AS02G02879-RA,AS06G02324-RA,AS03G02171-RA,AS11G01039-RA,AS08G00475-RA,AS10G00790-RA,AS07G03359-RA,AS02G01229-RA,AS06G00038-RA,AS08G01507-RA,AS04G02851-RA,AS08G01…	0.00641015615123903
61	BP	GO:0044262	cellular carbohydrate metabolic process	AS03G00193-RA,AS03G01682-RA,AS06G03877-RA,AS07G02652-RA,AS06G02919-RA,AS11G01054-RA,AS05G03183-RA,AS10G00394-RA,AS08G02978-RA,AS01G00890-RA,AS10G00011-RA,AS04G03615-RA,AS05G01966-RA,AS05G01458-RA,AS09G03125-RA,AS02G03148-RA,AS05G01042-RA,AS10G01060-RA,AS06G03895-RA,AS08G03796-RA,AS02G03587-RA,AS04G03294-RA,AS05G02988-RA,AS03G02171-RA,AS04G03253-RA,AS03G00672-RA,AS03G01787-RA,AS01G00561-RA,AS07G01…	0.00800505914752594
62	BP	GO:0010223	secondary shoot formation	AS01G00482-RA,AS04G02873-RA,AS04G03615-RA,AS01G01402-RA,AS01G00043-RA,AS04G00535-RA,AS01G01334-RA,AS11G01188-RA,AS08G02929-RA,AS05G02629-RA,AS06G02708-RA,AS04G02988-RA,AS07G01340-RA,AS05G01852-RA,AS09G03024-RA,AS06G00189-RA,AS04G01506-RA,AS09G00123-RA,AS10G02852-RA,AS11G01573-RA,AS05G00469-RA	0.00867868685730623
63	BP	GO:0010346	shoot axis formation	AS01G00482-RA,AS04G02873-RA,AS04G03615-RA,AS01G01402-RA,AS01G00043-RA,AS04G00535-RA,AS01G01334-RA,AS11G01188-RA,AS08G02929-RA,AS05G02629-RA,AS06G02708-RA,AS04G02988-RA,AS07G01340-RA,AS05G01852-RA,AS09G03024-RA,AS06G00189-RA,AS04G01506-RA,AS09G00123-RA,AS10G02852-RA,AS11G01573-RA,AS05G00469-RA	0.00867868685730623
64	MF	GO:0016701	oxidoreductase activity, acting on single donors with incorporation of molecular oxygen	AS02G00021-RA,AS10G02326-RA,AS09G01056-RA,AS10G02325-RA,AS10G02327-RA,AS11G02177-RA,AS03G02140-RA,AS08G01664-RA,AS09G03024-RA,AS03G00761-RA,AS07G03649-RA,AS07G00670-RA,AS09G02128-RA,AS10G02852-RA,AS02G02502-RA	0.00881195241655721
65	BP	GO:0009608	response to symbiont	AS05G02911-RA,AS05G01701-RA,AS10G01060-RA,AS05G01927-RA,AS01G03321-RA,AS05G00769-RA,AS04G02607-RA,AS05G01790-RA,AS03G00346-RA,AS09G00724-RA,AS06G00765-RA,AS10G01066-RA	0.00927865487601971
66	BP	GO:0055062	phosphate ion homeostasis	AS07G00118-RA,AS08G01185-RA,AS01G03419-RA,AS07G01374-RA,AS10G00710-RA,AS05G02191-RA,AS07G01340-RA,AS03G01724-RA,AS07G02009-RA,AS06G00546-RA,AS07G00098-RA,AS07G02008-RA,AS09G01506-RA	0.00927865487601971
67	BP	GO:0072506	trivalent inorganic anion homeostasis	AS07G00118-RA,AS08G01185-RA,AS01G03419-RA,AS07G01374-RA,AS10G00710-RA,AS05G02191-RA,AS07G01340-RA,AS03G01724-RA,AS07G02009-RA,AS06G00546-RA,AS07G00098-RA,AS07G02008-RA,AS09G01506-RA	0.00927865487601971
68	BP	GO:0001704	formation of primary germ layer	AS01G03561-RA,AS01G00714-RA,AS07G02418-RA,AS03G03032-RA,AS07G02394-RA,AS04G00330-RA,AS10G00611-RA,AS02G01214-RA,AS05G02501-RA	0.0108271325661461
69	BP	GO:0001706	endoderm formation	AS01G03561-RA,AS01G00714-RA,AS07G02418-RA,AS03G03032-RA,AS07G02394-RA,AS04G00330-RA,AS10G00611-RA,AS02G01214-RA,AS05G02501-RA	0.0108271325661461
70	BP	GO:0007492	endoderm development	AS01G03561-RA,AS01G00714-RA,AS07G02418-RA,AS03G03032-RA,AS07G02394-RA,AS04G00330-RA,AS10G00611-RA,AS02G01214-RA,AS05G02501-RA	0.0108271325661461
71	BP	GO:0009251	glucan catabolic process	AS03G01682-RA,AS07G02652-RA,AS05G01042-RA,AS10G01060-RA,AS04G03294-RA,AS03G01787-RA,AS01G00561-RA,AS04G03389-RA,AS05G02342-RA,AS07G03513-RA,AS01G01002-RA,AS08G02713-RA,AS08G00870-RA,AS11G02462-RA,AS10G01066-RA,AS02G00839-RA	0.0108271325661461
72	BP	GO:0009765	photosynthesis, light harvesting	AS06G02122-RA,AS05G03579-RA,AS04G02876-RA,AS01G03040-RA,AS10G01176-RA,AS11G02428-RA,AS09G02198-RA,AS09G00108-RA,AS10G01920-RA,AS01G00677-RA,AS07G00086-RA,AS07G03326-RA,AS11G00231-RA,AS04G03596-RA,AS11G00119-RA,AS06G01935-RA	0.0108271325661461
73	BP	GO:0046688	response to copper ion	AS11G02368-RA,AS02G03783-RA,AS02G02607-RA,AS11G01071-RA,AS07G00502-RA,AS11G02004-RA,AS09G00909-RA,AS03G00337-RA,AS07G00439-RA	0.0108271325661461
74	BP	GO:0009809	lignin biosynthetic process	AS08G00192-RA,AS09G00633-RA,AS06G02552-RA,AS06G03766-RA,AS05G00657-RA,AS04G00078-RA,AS09G00734-RA,AS05G03210-RA,AS06G01052-RA,AS07G02473-RA,AS01G03183-RA,AS06G03538-RA,AS11G00901-RA,AS06G00321-RA,AS08G00542-RA,AS01G01864-RA,AS07G02794-RA,AS06G03499-RA,AS07G02808-RA,AS01G01031-RA,AS07G03229-RA,AS05G02312-RA	0.011732064732457
75	BP	GO:0032787	monocarboxylic acid metabolic process	AS05G01212-RA,AS03G00193-RA,AS10G01838-RA,AS09G02013-RA,AS03G02877-RA,AS02G01896-RA,AS10G00394-RA,AS02G00021-RA,AS01G01757-RA,AS08G01444-RA,AS01G00890-RA,AS08G01635-RA,AS10G00011-RA,AS03G02333-RA,AS07G01828-RA,AS01G03749-RA,AS06G03572-RA,AS02G03682-RA,AS03G02355-RA,AS10G00041-RA,AS08G02992-RA,AS03G00095-RA,AS06G03895-RA,AS11G01014-RA,AS02G02884-RA,AS02G03587-RA,AS02G02275-RA,AS01G02770-RA,AS07G01…	0.0123359756254443
76	CC	GO:0048226	Casparian strip	AS08G02130-RA,AS10G00849-RA,AS01G03561-RA,AS05G00809-RA,AS07G02418-RA,AS07G02394-RA,AS04G00330-RA,AS10G00611-RA,AS02G01214-RA,AS05G02501-RA	0.0123736967009247
77	BP	GO:0050801	ion homeostasis	AS02G01385-RA,AS09G01065-RA,AS05G00633-RA,AS07G03399-RA,AS06G00643-RA,AS07G00701-RA,AS07G00118-RA,AS05G00447-RA,AS08G01185-RA,AS08G02195-RA,AS06G02324-RA,AS07G02795-RA,AS07G01831-RA,AS01G03419-RA,AS09G01561-RA,AS02G01004-RA,AS05G03279-RA,AS02G00164-RA,AS07G03347-RA,AS05G00082-RA,AS08G00562-RA,AS07G01374-RA,AS03G00181-RA,AS08G03804-RA,AS10G00435-RA,AS01G02826-RA,AS01G03561-RA,AS08G00174-RA,AS06G02…	0.012457911689221
78	BP	GO:0005983	starch catabolic process	AS03G01682-RA,AS05G01042-RA,AS10G01060-RA,AS04G03294-RA,AS03G01787-RA,AS01G00561-RA,AS04G03389-RA,AS05G02342-RA,AS01G01002-RA,AS08G00870-RA,AS10G01066-RA	0.0124636253372773
79	BP	GO:0009723	response to ethylene	AS04G01032-RA,AS02G02678-RA,AS09G02337-RA,AS07G02566-RA,AS09G01065-RA,AS10G00126-RA,AS04G01097-RA,AS03G01743-RA,AS05G02093-RA,AS07G03532-RA,AS07G02637-RA,AS02G00605-RA,AS01G01793-RA,AS08G00834-RA,AS02G02444-RA,AS02G02454-RA,AS06G00294-RA,AS11G01588-RA,AS07G03192-RA,AS06G03906-RA,AS01G01194-RA,AS01G00075-RA,AS06G03586-RA,AS10G00774-RA,AS08G00830-RA,AS02G03455-RA,AS06G03556-RA,AS03G01365-RA,AS08G00…	0.0124636253372773
80	MF	GO:0016702	oxidoreductase activity, acting on single donors with incorporation of molecular oxygen, incorporation of two atoms of oxygen	AS02G00021-RA,AS10G02326-RA,AS09G01056-RA,AS10G02325-RA,AS10G02327-RA,AS03G02140-RA,AS09G03024-RA,AS03G00761-RA,AS07G03649-RA,AS09G02128-RA,AS10G02852-RA,AS02G02502-RA	0.0124636253372773
81	MF	GO:0031409	pigment binding	AS05G03579-RA,AS01G03040-RA,AS10G01176-RA,AS09G02198-RA,AS09G00108-RA,AS10G01920-RA,AS07G03326-RA,AS11G00231-RA,AS04G03596-RA,AS11G00119-RA,AS06G01935-RA	0.0124636253372773
82	CC	GO:0046658	anchored component of plasma membrane	AS02G02347-RA,AS08G02807-RA,AS10G00222-RA,AS01G00070-RA,AS09G00741-RA,AS01G02148-RA,AS07G03048-RA,AS04G03253-RA,AS05G00589-RA,AS11G00716-RA,AS02G01556-RA,AS07G02278-RA,AS07G00695-RA,AS10G01486-RA,AS02G01865-RA,AS04G02739-RA,AS05G03630-RA,AS02G00375-RA,AS05G00235-RA,AS06G03453-RA,AS02G02508-RA,AS11G00332-RA,AS03G02256-RA,AS04G03498-RA,AS06G00548-RA,AS01G00928-RA,AS01G02890-RA,AS10G00384-RA,AS07G00…	0.0124636253372773
83	MF	GO:0080043	quercetin 3-O-glucosyltransferase activity	AS08G00192-RA,AS03G01636-RA,AS07G02435-RA,AS02G01728-RA,AS04G02915-RA,AS10G02988-RA,AS04G02912-RA,AS07G02473-RA,AS08G03750-RA,AS06G02474-RA,AS04G01317-RA,AS10G01902-RA,AS03G02500-RA,AS06G01366-RA,AS03G02763-RA,AS06G00410-RA,AS06G02143-RA,AS02G00153-RA,AS06G03772-RA,AS06G03787-RA,AS07G02660-RA,AS04G02275-RA,AS06G03786-RA,AS10G01904-RA,AS04G02917-RA,AS04G03320-RA,AS06G01971-RA,AS06G01909-RA	0.0124636253372773
84	MF	GO:0080044	quercetin 7-O-glucosyltransferase activity	AS08G00192-RA,AS03G01636-RA,AS07G02435-RA,AS02G01728-RA,AS04G02915-RA,AS10G02988-RA,AS04G02912-RA,AS07G02473-RA,AS08G03750-RA,AS06G02474-RA,AS04G01317-RA,AS10G01902-RA,AS03G02500-RA,AS06G01366-RA,AS03G02763-RA,AS06G00410-RA,AS06G02143-RA,AS02G00153-RA,AS06G03772-RA,AS06G03787-RA,AS07G02660-RA,AS04G02275-RA,AS06G03786-RA,AS10G01904-RA,AS04G02917-RA,AS04G03320-RA,AS06G01971-RA,AS06G01909-RA	0.0124636253372773
85	BP	GO:0044247	cellular polysaccharide catabolic process	AS03G01682-RA,AS07G02652-RA,AS06G02919-RA,AS05G01042-RA,AS10G01060-RA,AS04G03294-RA,AS03G00672-RA,AS03G01787-RA,AS01G00561-RA,AS04G03389-RA,AS04G02831-RA,AS05G02342-RA,AS07G03513-RA,AS01G01002-RA,AS08G02713-RA,AS03G01598-RA,AS08G00870-RA,AS10G01066-RA	0.0145122788429917
86	BP	GO:1901615	organic hydroxy compound metabolic process	AS05G03438-RA,AS10G01838-RA,AS07G02696-RA,AS02G01173-RA,AS02G00021-RA,AS08G01635-RA,AS05G01966-RA,AS05G01458-RA,AS03G01881-RA,AS02G02773-RA,AS10G00041-RA,AS04G03172-RA,AS04G02302-RA,AS08G02992-RA,AS04G02058-RA,AS06G03895-RA,AS04G00162-RA,AS02G02275-RA,AS01G02770-RA,AS03G02171-RA,AS02G00703-RA,AS07G01831-RA,AS04G02915-RA,AS09G00215-RA,AS05G03210-RA,AS11G01469-RA,AS08G02567-RA,AS01G00115-RA,AS05G00…	0.016765390376077
87	BP	GO:0009642	response to light intensity	AS02G01104-RA,AS07G02696-RA,AS06G01894-RA,AS03G00620-RA,AS04G02056-RA,AS02G03561-RA,AS03G02949-RA,AS08G00194-RA,AS01G00215-RA,AS06G00038-RA,AS06G00218-RA,AS02G02607-RA,AS11G01071-RA,AS03G00476-RA,AS11G01588-RA,AS07G03192-RA,AS05G01863-RA,AS05G00082-RA,AS02G00016-RA,AS02G03214-RA,AS02G02681-RA,AS11G02376-RA,AS02G00885-RA,AS04G02876-RA,AS02G01827-RA,AS11G00213-RA,AS10G02689-RA,AS08G01983-RA,AS10G00…	0.0168295757771591
88	MF	GO:0015562	efflux transmembrane transporter activity	AS02G01323-RA,AS10G02336-RA,AS03G02705-RA,AS01G02059-RA,AS02G03234-RA,AS06G02731-RA,AS07G01458-RA,AS08G02283-RA,AS11G02515-RA,AS09G00475-RA,AS01G01231-RA,AS05G01171-RA,AS05G03527-RA,AS05G02457-RA	0.0168295757771591
89	MF	GO:0004553	hydrolase activity, hydrolyzing O-glycosyl compounds	AS02G02347-RA,AS04G00569-RA,AS10G01838-RA,AS06G02919-RA,AS08G02978-RA,AS01G00070-RA,AS09G00741-RA,AS10G00041-RA,AS08G03796-RA,AS08G00705-RA,AS11G02137-RA,AS07G03048-RA,AS11G01010-RA,AS03G00672-RA,AS03G01787-RA,AS01G00561-RA,AS09G00416-RA,AS07G00695-RA,AS02G01865-RA,AS04G02739-RA,AS05G03630-RA,AS01G02335-RA,AS04G02831-RA,AS05G03367-RA,AS05G01653-RA,AS07G03367-RA,AS05G00235-RA,AS06G03453-RA,AS04G03…	0.0169700793814549
90	BP	GO:0010087	phloem or xylem histogenesis	AS08G02088-RA,AS01G00482-RA,AS02G01402-RA,AS02G03287-RA,AS05G00657-RA,AS11G00416-RA,AS01G00047-RA,AS03G02124-RA,AS07G03209-RA,AS11G01197-RA,AS01G00371-RA,AS08G00834-RA,AS08G01987-RA,AS11G01588-RA,AS11G01868-RA,AS02G00201-RA,AS08G02921-RA,AS05G01068-RA,AS08G00835-RA,AS02G00128-RA,AS08G03800-RA,AS08G00735-RA,AS01G01966-RA,AS06G03499-RA,AS06G03805-RA,AS06G00017-RA,AS09G01824-RA,AS03G00690-RA,AS05G02…	0.0169700793814549
91	MF	GO:0015175	neutral amino acid transmembrane transporter activity	AS01G02472-RA,AS02G00798-RA,AS08G00556-RA,AS05G01082-RA,AS07G00771-RA,AS02G02233-RA,AS05G00133-RA,AS01G00507-RA,AS03G00501-RA	0.0169700793814549
92	MF	GO:0015179	L-amino acid transmembrane transporter activity	AS01G02472-RA,AS02G00798-RA,AS08G00556-RA,AS05G01082-RA,AS07G00771-RA,AS02G02233-RA,AS05G00133-RA,AS10G01511-RA,AS01G00507-RA,AS03G00501-RA,AS09G00475-RA,AS05G01171-RA,AS05G03527-RA	0.0169700793814549
93	BP	GO:0015804	neutral amino acid transport	AS01G02472-RA,AS02G00798-RA,AS08G00556-RA,AS05G01082-RA,AS07G00771-RA,AS02G02233-RA,AS05G00133-RA,AS01G00507-RA,AS03G00501-RA	0.0169700793814549
94	BP	GO:0015807	L-amino acid transport	AS01G02472-RA,AS02G00798-RA,AS08G00556-RA,AS05G01082-RA,AS07G00771-RA,AS02G02233-RA,AS05G00133-RA,AS10G01511-RA,AS01G00507-RA,AS03G00501-RA,AS09G00475-RA,AS05G01171-RA,AS05G03527-RA	0.0169700793814549
95	BP	GO:0071554	cell wall organization or biogenesis	AS08G02088-RA,AS06G02919-RA,AS07G02930-RA,AS11G01054-RA,AS05G00679-RA,AS03G01000-RA,AS08G03009-RA,AS05G00276-RA,AS02G01402-RA,AS02G03287-RA,AS09G01748-RA,AS02G02773-RA,AS01G03108-RA,AS10G00849-RA,AS08G03796-RA,AS06G03252-RA,AS08G02206-RA,AS01G00651-RA,AS06G01846-RA,AS04G03253-RA,AS07G00973-RA,AS09G00319-RA,AS08G00494-RA,AS05G01822-RA,AS03G00672-RA,AS04G00078-RA,AS02G01556-RA,AS04G01135-RA,AS05G01…	0.0169700793814549
96	BP	GO:1902475	L-alpha-amino acid transmembrane transport	AS01G02472-RA,AS02G00798-RA,AS08G00556-RA,AS05G01082-RA,AS07G00771-RA,AS02G02233-RA,AS05G00133-RA,AS10G01511-RA,AS01G00507-RA,AS03G00501-RA,AS09G00475-RA,AS05G01171-RA,AS05G03527-RA	0.0169700793814549
97	MF	GO:0008374	O-acyltransferase activity	AS05G00679-RA,AS03G01000-RA,AS11G02152-RA,AS05G00276-RA,AS08G02206-RA,AS06G03791-RA,AS06G01846-RA,AS03G00290-RA,AS01G01758-RA,AS07G00850-RA,AS02G02549-RA,AS11G02539-RA,AS09G00024-RA,AS07G01109-RA,AS01G02519-RA,AS07G02714-RA,AS05G03496-RA,AS03G00999-RA,AS08G00240-RA,AS10G00452-RA,AS11G01956-RA,AS02G03268-RA,AS11G01586-RA,AS07G02808-RA,AS06G03455-RA,AS10G00023-RA,AS01G01395-RA,AS11G01840-RA,AS06G00…	0.0173186562628426
98	BP	GO:0009624	response to nematode	AS03G02304-RA,AS10G01083-RA,AS05G00054-RA,AS06G03390-RA,AS04G01287-RA,AS01G01402-RA,AS04G02221-RA,AS06G02074-RA,AS03G01878-RA,AS04G03389-RA,AS10G02706-RA,AS04G03455-RA,AS08G02647-RA,AS11G00597-RA,AS01G03792-RA,AS05G01175-RA,AS05G00133-RA,AS08G00850-RA,AS03G00320-RA,AS03G00527-RA,AS01G00507-RA,AS09G00933-RA,AS10G01082-RA,AS02G00531-RA,AS10G01198-RA,AS06G01298-RA,AS01G02749-RA,AS08G00398-RA,AS10G02…	0.0173392260834661
99	MF	GO:0008514	organic anion transmembrane transporter activity	AS04G01032-RA,AS02G00896-RA,AS04G02749-RA,AS09G01065-RA,AS01G02472-RA,AS11G00783-RA,AS05G00054-RA,AS03G02281-RA,AS03G01421-RA,AS08G00162-RA,AS09G00443-RA,AS01G01402-RA,AS06G00852-RA,AS10G00735-RA,AS09G00630-RA,AS04G03322-RA,AS02G00798-RA,AS09G01080-RA,AS08G00556-RA,AS08G02207-RA,AS05G01082-RA,AS10G00774-RA,AS01G00299-RA,AS07G00771-RA,AS02G03559-RA,AS02G01856-RA,AS04G00431-RA,AS02G02233-RA,AS05G00…	0.0173403403615491
100	MF	GO:0030247	polysaccharide binding	AS02G02347-RA,AS08G02807-RA,AS01G00070-RA,AS09G00741-RA,AS05G01042-RA,AS07G03048-RA,AS07G00695-RA,AS02G01865-RA,AS04G02739-RA,AS05G03630-RA,AS05G02342-RA,AS05G00235-RA,AS06G03453-RA,AS07G03513-RA,AS04G03498-RA,AS01G01002-RA,AS07G00781-RA,AS02G00792-RA,AS10G02172-RA,AS11G01797-RA,AS08G01519-RA,AS06G00947-RA,AS10G01676-RA,AS01G01905-RA	0.0173955455881976
101	BP	GO:2000652	regulation of secondary cell wall biogenesis	AS08G02088-RA,AS02G01402-RA,AS02G03287-RA,AS08G00494-RA,AS06G00321-RA,AS01G01864-RA,AS08G00735-RA,AS03G00690-RA,AS03G01038-RA,AS05G01661-RA,AS02G01081-RA,AS01G03423-RA	0.0173955455881976
102	MF	GO:0019203	carbohydrate phosphatase activity	AS04G03615-RA,AS05G01042-RA,AS05G02342-RA,AS03G00695-RA,AS01G01002-RA,AS08G00876-RA,AS04G02216-RA,AS06G00547-RA,AS05G01852-RA,AS08G02149-RA,AS09G00123-RA	0.0176284749129631
103	BP	GO:0035987	endodermal cell differentiation	AS01G03561-RA,AS07G02418-RA,AS07G02394-RA,AS04G00330-RA,AS10G00611-RA,AS02G01214-RA,AS05G02501-RA	0.0188983039888481
104	BP	GO:0009404	toxin metabolic process	AS04G03593-RA,AS01G03608-RA,AS11G02355-RA,AS02G02948-RA,AS05G02988-RA,AS03G00048-RA,AS02G03252-RA,AS10G02600-RA,AS10G00416-RA,AS11G02363-RA,AS01G00665-RA,AS04G03120-RA,AS01G01847-RA,AS06G01704-RA,AS08G00391-RA,AS09G00733-RA,AS01G03033-RA	0.0194563244864787
105	BP	GO:2000022	regulation of jasmonic acid mediated signaling pathway	AS08G00595-RA,AS03G01743-RA,AS05G02093-RA,AS04G00212-RA,AS11G01951-RA,AS08G01240-RA,AS03G00354-RA,AS01G00309-RA,AS09G02126-RA,AS10G00617-RA,AS09G01946-RA,AS01G01433-RA,AS06G02726-RA,AS03G00294-RA,AS11G02094-RA,AS07G00547-RA,AS07G00873-RA	0.0194563244864787
106	MF	GO:0004497	monooxygenase activity	AS08G02096-RA,AS05G03438-RA,AS07G02696-RA,AS09G00043-RA,AS05G03599-RA,AS04G02302-RA,AS02G02948-RA,AS04G01453-RA,AS04G00162-RA,AS02G00410-RA,AS09G00215-RA,AS03G00649-RA,AS11G01716-RA,AS06G01052-RA,AS01G03184-RA,AS07G01482-RA,AS05G00251-RA,AS03G00648-RA,AS02G01497-RA,AS05G01898-RA,AS06G00607-RA,AS01G03081-RA,AS08G00542-RA,AS11G02177-RA,AS06G01384-RA,AS04G03360-RA,AS03G02657-RA,AS01G02713-RA,AS02G01…	0.0198230016579664
107	BP	GO:0042445	hormone metabolic process	AS05G03438-RA,AS06G01231-RA,AS07G02696-RA,AS06G00940-RA,AS08G01635-RA,AS03G02434-RA,AS06G03572-RA,AS02G02773-RA,AS02G03209-RA,AS01G03108-RA,AS04G02302-RA,AS02G02948-RA,AS01G02014-RA,AS04G00162-RA,AS02G02275-RA,AS01G02770-RA,AS03G00755-RA,AS10G00532-RA,AS08G02567-RA,AS03G02754-RA,AS06G00294-RA,AS05G03160-RA,AS01G03184-RA,AS03G02637-RA,AS07G03192-RA,AS01G00075-RA,AS02G01497-RA,AS07G01374-RA,AS01G02…	0.0198230016579664
108	BP	GO:0090693	plant organ senescence	AS09G00433-RA,AS03G00421-RA,AS01G03495-RA,AS05G03368-RA,AS07G00701-RA,AS09G03052-RA,AS01G01901-RA,AS04G01097-RA,AS01G02456-RA,AS02G00963-RA,AS05G02988-RA,AS08G01864-RA,AS01G01758-RA,AS01G03184-RA,AS06G02623-RA,AS08G01952-RA,AS10G02583-RA,AS05G00256-RA,AS08G02401-RA,AS01G03321-RA,AS03G00181-RA,AS01G03785-RA,AS01G00286-RA,AS05G02922-RA,AS06G00024-RA,AS02G02642-RA,AS09G00612-RA,AS04G01855-RA,AS02G03…	0.0198230016579664
109	BP	GO:0031667	response to nutrient levels	AS10G01414-RA,AS04G00646-RA,AS09G01065-RA,AS01G03155-RA,AS02G03562-RA,AS11G00774-RA,AS07G01446-RA,AS05G03415-RA,AS08G02493-RA,AS05G02011-RA,AS05G00397-RA,AS08G01185-RA,AS07G01052-RA,AS06G02324-RA,AS03G02171-RA,AS11G01039-RA,AS08G00475-RA,AS10G00790-RA,AS07G03359-RA,AS02G01229-RA,AS06G00038-RA,AS08G01507-RA,AS04G02851-RA,AS08G01016-RA,AS09G01728-RA,AS07G03347-RA,AS07G03192-RA,AS05G01863-RA,AS05G00…	0.0201425129484123
110	BP	GO:0010150	leaf senescence	AS09G00433-RA,AS03G00421-RA,AS01G03495-RA,AS05G03368-RA,AS07G00701-RA,AS09G03052-RA,AS01G01901-RA,AS04G01097-RA,AS01G02456-RA,AS02G00963-RA,AS05G02988-RA,AS08G01864-RA,AS01G01758-RA,AS01G03184-RA,AS06G02623-RA,AS08G01952-RA,AS10G02583-RA,AS05G00256-RA,AS01G03321-RA,AS03G00181-RA,AS01G03785-RA,AS01G00286-RA,AS05G02922-RA,AS06G00024-RA,AS02G02642-RA,AS09G00612-RA,AS04G01855-RA,AS02G03268-RA,AS01G02…	0.0202045414314666
111	CC	GO:0031225	anchored component of membrane	AS02G02347-RA,AS08G02807-RA,AS10G00222-RA,AS01G00070-RA,AS09G00741-RA,AS01G02148-RA,AS06G03472-RA,AS07G03048-RA,AS04G03253-RA,AS05G00589-RA,AS11G00716-RA,AS02G01556-RA,AS07G02278-RA,AS07G00695-RA,AS10G01486-RA,AS05G02144-RA,AS02G01865-RA,AS04G02739-RA,AS05G03630-RA,AS02G00375-RA,AS05G00235-RA,AS06G03453-RA,AS02G02508-RA,AS11G00332-RA,AS03G02256-RA,AS04G03498-RA,AS02G00135-RA,AS06G00548-RA,AS01G00…	0.0224404124398611
112	MF	GO:0051213	dioxygenase activity	AS02G00021-RA,AS10G02326-RA,AS09G01056-RA,AS03G02434-RA,AS02G03209-RA,AS03G00755-RA,AS10G02325-RA,AS10G00532-RA,AS07G01900-RA,AS01G03184-RA,AS10G02327-RA,AS08G01417-RA,AS02G01907-RA,AS06G02612-RA,AS03G02140-RA,AS05G01464-RA,AS06G01981-RA,AS07G00276-RA,AS01G02678-RA,AS11G02533-RA,AS08G03187-RA,AS09G03024-RA,AS01G03380-RA,AS03G00761-RA,AS07G03649-RA,AS05G01017-RA,AS09G02128-RA,AS01G03026-RA,AS07G03…	0.0224404124398611
113	BP	GO:0055083	monovalent inorganic anion homeostasis	AS07G00118-RA,AS08G01185-RA,AS01G03419-RA,AS07G01374-RA,AS10G00710-RA,AS05G02191-RA,AS07G01340-RA,AS03G01724-RA,AS07G02009-RA,AS06G00546-RA,AS07G00098-RA,AS07G02008-RA,AS09G01506-RA	0.0224404124398611
114	BP	GO:0071369	cellular response to ethylene stimulus	AS04G01032-RA,AS02G02678-RA,AS09G02337-RA,AS07G02566-RA,AS09G01065-RA,AS10G00126-RA,AS01G01793-RA,AS08G00834-RA,AS02G02444-RA,AS02G02454-RA,AS06G00294-RA,AS11G01588-RA,AS10G00774-RA,AS08G00830-RA,AS02G03455-RA,AS06G03556-RA,AS08G00835-RA,AS02G00564-RA,AS02G01356-RA,AS03G01672-RA,AS11G01504-RA,AS07G00065-RA,AS05G00644-RA,AS04G00198-RA,AS07G01823-RA,AS06G00990-RA,AS02G02189-RA,AS11G01505-RA,AS02G02…	0.0224404124398611
115	BP	GO:0071395	cellular response to jasmonic acid stimulus	AS01G03495-RA,AS08G00595-RA,AS10G00035-RA,AS06G03379-RA,AS03G01743-RA,AS05G02093-RA,AS04G00212-RA,AS03G02124-RA,AS08G00834-RA,AS07G03192-RA,AS11G01951-RA,AS02G00852-RA,AS07G01374-RA,AS02G03804-RA,AS08G01240-RA,AS07G01193-RA,AS08G00835-RA,AS03G00354-RA,AS01G00309-RA,AS09G02126-RA,AS02G01356-RA,AS11G01504-RA,AS10G00710-RA,AS03G00197-RA,AS01G02041-RA,AS08G01873-RA,AS04G00198-RA,AS07G00717-RA,AS10G00…	0.0226702444885333
116	BP	GO:0009064	glutamine family amino acid metabolic process	AS04G03487-RA,AS02G03682-RA,AS05G02011-RA,AS09G01435-RA,AS09G03052-RA,AS05G02988-RA,AS06G03497-RA,AS04G00030-RA,AS09G02523-RA,AS02G03218-RA,AS04G01016-RA,AS08G01085-RA,AS01G02494-RA,AS04G00414-RA,AS11G02178-RA,AS01G01847-RA,AS11G02182-RA	0.0240084274834314
117	BP	GO:1905428	regulation of plant organ formation	AS04G02873-RA,AS04G03615-RA,AS06G00080-RA,AS01G01402-RA,AS01G00043-RA,AS04G00535-RA,AS05G01898-RA,AS05G02629-RA,AS06G02708-RA,AS05G01852-RA,AS04G01506-RA,AS09G00123-RA,AS11G01573-RA,AS05G00135-RA,AS05G00469-RA	0.0240084274834314
118	BP	GO:0010453	regulation of cell fate commitment	AS08G02130-RA,AS02G00053-RA,AS03G02171-RA,AS07G02418-RA,AS07G02394-RA,AS04G00330-RA,AS10G00611-RA,AS03G00880-RA,AS06G02563-RA,AS02G01214-RA,AS01G01899-RA	0.0251098023508135
119	BP	GO:0042659	regulation of cell fate specification	AS08G02130-RA,AS02G00053-RA,AS07G02418-RA,AS07G02394-RA,AS04G00330-RA,AS10G00611-RA,AS03G00880-RA,AS06G02563-RA,AS02G01214-RA	0.0252478636189838
120	BP	GO:0009834	plant-type secondary cell wall biogenesis	AS08G02088-RA,AS11G01054-RA,AS02G01402-RA,AS02G03287-RA,AS02G02773-RA,AS01G03108-RA,AS08G00494-RA,AS05G00042-RA,AS03G02428-RA,AS11G00901-RA,AS01G02519-RA,AS06G00321-RA,AS06G03003-RA,AS01G01864-RA,AS02G01636-RA,AS08G00735-RA,AS03G00690-RA,AS05G03241-RA,AS06G02964-RA,AS03G01038-RA,AS05G01661-RA,AS05G01615-RA,AS02G01081-RA,AS01G03423-RA,AS09G00111-RA,AS01G01899-RA	0.0252588743951085
121	BP	GO:0007369	gastrulation	AS01G03561-RA,AS06G02271-RA,AS01G00714-RA,AS07G02418-RA,AS03G03032-RA,AS07G02394-RA,AS04G00330-RA,AS10G00611-RA,AS02G01214-RA,AS05G02501-RA	0.0252867682075166
122	BP	GO:0016036	cellular response to phosphate starvation	AS09G01065-RA,AS02G03562-RA,AS11G00774-RA,AS07G01446-RA,AS05G03415-RA,AS08G02493-RA,AS05G02011-RA,AS08G01185-RA,AS08G01016-RA,AS09G01728-RA,AS05G01863-RA,AS10G00111-RA,AS08G03388-RA,AS07G01374-RA,AS09G02404-RA,AS04G02344-RA,AS10G00664-RA,AS10G00710-RA,AS01G00060-RA,AS05G00137-RA,AS06G01642-RA,AS04G00414-RA,AS07G03607-RA,AS10G00752-RA,AS02G01816-RA,AS07G01340-RA,AS06G01821-RA	0.0252867682075166
123	BP	GO:0015711	organic anion transport	AS04G01032-RA,AS02G00896-RA,AS04G03084-RA,AS04G02749-RA,AS03G02800-RA,AS09G01065-RA,AS01G02472-RA,AS11G00783-RA,AS05G00054-RA,AS03G02281-RA,AS03G01421-RA,AS08G00162-RA,AS09G00443-RA,AS01G01402-RA,AS07G03532-RA,AS06G00852-RA,AS09G01955-RA,AS10G00735-RA,AS07G00237-RA,AS09G00630-RA,AS04G03322-RA,AS02G00798-RA,AS09G01080-RA,AS08G00556-RA,AS08G02207-RA,AS05G01082-RA,AS10G00774-RA,AS01G00299-RA,AS07G00…	0.0258723532273744
124	CC	GO:0048046	apoplast	AS06G01305-RA,AS07G02576-RA,AS05G00026-RA,AS06G02919-RA,AS05G03112-RA,AS06G03290-RA,AS07G01061-RA,AS07G03371-RA,AS05G01210-RA,AS05G00731-RA,AS04G03610-RA,AS05G01842-RA,AS05G00657-RA,AS06G03895-RA,AS04G00885-RA,AS08G03796-RA,AS10G01577-RA,AS04G02764-RA,AS01G00035-RA,AS02G02954-RA,AS10G01486-RA,AS11G01071-RA,AS06G00603-RA,AS04G02739-RA,AS03G00476-RA,AS05G03630-RA,AS04G00480-RA,AS09G00052-RA,AS01G01…	0.0258723532273744
125	BP	GO:0009606	tropism	AS07G01953-RA,AS01G01620-RA,AS06G03379-RA,AS07G03044-RA,AS05G00397-RA,AS09G01808-RA,AS10G01892-RA,AS01G01402-RA,AS01G00512-RA,AS02G01323-RA,AS04G02674-RA,AS10G02794-RA,AS03G00004-RA,AS04G02851-RA,AS03G02637-RA,AS05G00082-RA,AS03G02705-RA,AS06G01070-RA,AS02G03234-RA,AS06G02731-RA,AS07G01458-RA,AS08G02283-RA,AS11G02515-RA,AS01G01861-RA,AS10G00143-RA,AS06G01895-RA,AS08G03535-RA,AS07G01546-RA,AS11G02…	0.0263061551195947
126	BP	GO:0009637	response to blue light	AS07G01953-RA,AS06G03884-RA,AS02G01607-RA,AS01G01620-RA,AS10G01892-RA,AS05G01456-RA,AS09G00311-RA,AS08G00194-RA,AS04G02674-RA,AS10G02794-RA,AS01G00215-RA,AS05G00451-RA,AS05G03579-RA,AS07G03192-RA,AS05G00082-RA,AS11G00324-RA,AS02G00016-RA,AS02G02681-RA,AS07G03628-RA,AS11G02376-RA,AS11G00213-RA,AS08G03373-RA,AS06G02731-RA,AS08G02283-RA,AS11G01104-RA,AS09G02198-RA,AS09G00108-RA,AS06G01895-RA,AS02G02…	0.0263061551195947
127	BP	GO:0031668	cellular response to extracellular stimulus	AS10G01414-RA,AS02G00057-RA,AS04G00646-RA,AS09G01065-RA,AS08G03419-RA,AS02G03562-RA,AS03G00884-RA,AS11G00774-RA,AS07G01446-RA,AS05G03415-RA,AS08G02493-RA,AS05G02011-RA,AS05G02626-RA,AS05G00397-RA,AS08G01185-RA,AS02G02879-RA,AS06G02324-RA,AS03G02171-RA,AS08G00475-RA,AS10G00790-RA,AS02G01229-RA,AS06G00038-RA,AS04G02851-RA,AS08G01016-RA,AS09G01728-RA,AS07G03347-RA,AS05G01863-RA,AS09G02523-RA,AS05G00…	0.0263061551195947
128	BP	GO:0071398	cellular response to fatty acid	AS01G03495-RA,AS08G00595-RA,AS10G00035-RA,AS06G03379-RA,AS03G01743-RA,AS05G02093-RA,AS04G00212-RA,AS03G02124-RA,AS08G00834-RA,AS07G03192-RA,AS01G00075-RA,AS11G01951-RA,AS02G00852-RA,AS07G01374-RA,AS02G03804-RA,AS08G01240-RA,AS07G01193-RA,AS08G00835-RA,AS11G00382-RA,AS03G00354-RA,AS01G00309-RA,AS09G02126-RA,AS02G01356-RA,AS11G01504-RA,AS10G00710-RA,AS03G00197-RA,AS01G02041-RA,AS08G01873-RA,AS04G00…	0.0263061551195947
129	BP	GO:0071669	plant-type cell wall organization or biogenesis	AS08G02088-RA,AS06G02919-RA,AS11G01054-RA,AS08G03009-RA,AS02G01402-RA,AS02G03287-RA,AS09G01748-RA,AS02G02773-RA,AS01G03108-RA,AS01G00651-RA,AS04G03253-RA,AS09G00319-RA,AS08G00494-RA,AS04G01135-RA,AS05G01444-RA,AS05G00042-RA,AS04G02739-RA,AS05G03630-RA,AS03G02070-RA,AS03G02428-RA,AS11G00901-RA,AS01G02519-RA,AS01G03145-RA,AS06G00321-RA,AS06G03003-RA,AS09G00329-RA,AS01G01864-RA,AS06G01120-RA,AS02G01…	0.0263061551195947
130	MF	GO:0008194	UDP-glycosyltransferase activity	AS08G00192-RA,AS11G01054-RA,AS03G01636-RA,AS08G02989-RA,AS07G02435-RA,AS02G03148-RA,AS08G02333-RA,AS01G02014-RA,AS02G01728-RA,AS07G00973-RA,AS04G02915-RA,AS07G00526-RA,AS10G02988-RA,AS04G01135-RA,AS05G00042-RA,AS04G02912-RA,AS07G02473-RA,AS02G03214-RA,AS01G02015-RA,AS08G03750-RA,AS06G02474-RA,AS04G01317-RA,AS10G01902-RA,AS03G02500-RA,AS06G01366-RA,AS06G00925-RA,AS03G00731-RA,AS08G00356-RA,AS03G00…	0.026660291837612
131	BP	GO:0046677	response to antibiotic	AS07G02930-RA,AS01G03495-RA,AS10G00035-RA,AS04G02942-RA,AS02G00053-RA,AS04G01097-RA,AS08G02333-RA,AS11G01014-RA,AS03G01743-RA,AS05G02093-RA,AS04G02699-RA,AS01G02770-RA,AS01G02261-RA,AS05G01456-RA,AS09G00311-RA,AS02G03561-RA,AS07G03532-RA,AS03G01878-RA,AS08G00194-RA,AS02G00605-RA,AS02G02607-RA,AS11G01071-RA,AS05G03296-RA,AS03G00476-RA,AS01G03184-RA,AS07G03192-RA,AS05G01863-RA,AS06G03906-RA,AS01G01…	0.0275206202168839
132	BP	GO:0000272	polysaccharide catabolic process	AS03G01682-RA,AS07G02652-RA,AS06G02919-RA,AS05G01042-RA,AS10G01060-RA,AS08G03796-RA,AS04G03294-RA,AS03G00672-RA,AS03G01787-RA,AS01G00561-RA,AS04G03389-RA,AS04G02831-RA,AS05G02342-RA,AS07G03513-RA,AS10G02677-RA,AS01G01002-RA,AS08G02713-RA,AS03G01598-RA,AS08G00870-RA,AS03G02764-RA,AS11G02462-RA,AS07G03229-RA,AS10G01066-RA,AS02G00839-RA	0.0275742060987664
133	BP	GO:0044042	glucan metabolic process	AS03G01682-RA,AS06G03877-RA,AS07G02652-RA,AS05G03183-RA,AS08G02978-RA,AS02G03148-RA,AS05G01042-RA,AS10G01060-RA,AS04G03294-RA,AS04G03253-RA,AS03G01787-RA,AS01G00561-RA,AS07G01597-RA,AS05G00042-RA,AS04G03389-RA,AS03G02637-RA,AS05G02342-RA,AS03G02428-RA,AS02G03214-RA,AS07G01109-RA,AS03G00731-RA,AS07G03513-RA,AS08G00356-RA,AS06G03003-RA,AS09G00329-RA,AS02G01636-RA,AS01G01002-RA,AS05G01477-RA,AS08G02…	0.0278621854661581
134	BP	GO:0072505	divalent inorganic anion homeostasis	AS07G00118-RA,AS08G01185-RA,AS01G03419-RA,AS07G01374-RA,AS10G00710-RA,AS05G02191-RA,AS07G01340-RA,AS03G01724-RA,AS07G02009-RA,AS06G00546-RA,AS07G00098-RA,AS07G02008-RA,AS09G01506-RA	0.0278621854661581
135	BP	GO:0098660	inorganic ion transmembrane transport	AS02G01376-RA,AS10G01414-RA,AS10G00067-RA,AS05G01659-RA,AS04G02230-RA,AS04G01858-RA,AS07G02756-RA,AS06G03390-RA,AS06G03379-RA,AS08G00460-RA,AS06G03572-RA,AS08G01185-RA,AS04G03264-RA,AS03G00780-RA,AS07G02795-RA,AS01G03438-RA,AS02G02965-RA,AS09G02562-RA,AS02G03048-RA,AS09G01561-RA,AS08G02302-RA,AS04G00078-RA,AS06G00852-RA,AS02G01004-RA,AS10G02794-RA,AS01G02917-RA,AS02G02980-RA,AS08G01507-RA,AS02G03…	0.0280450979693104
136	BP	GO:0006073	cellular glucan metabolic process	AS03G01682-RA,AS06G03877-RA,AS07G02652-RA,AS05G03183-RA,AS08G02978-RA,AS02G03148-RA,AS05G01042-RA,AS10G01060-RA,AS04G03294-RA,AS04G03253-RA,AS03G01787-RA,AS01G00561-RA,AS07G01597-RA,AS05G00042-RA,AS04G03389-RA,AS03G02637-RA,AS05G02342-RA,AS03G02428-RA,AS02G03214-RA,AS07G01109-RA,AS03G00731-RA,AS07G03513-RA,AS08G00356-RA,AS06G03003-RA,AS09G00329-RA,AS02G01636-RA,AS01G01002-RA,AS05G01477-RA,AS08G02…	0.0296750305253194
137	BP	GO:0042594	response to starvation	AS04G00646-RA,AS09G01065-RA,AS01G03155-RA,AS02G03562-RA,AS11G00774-RA,AS07G01446-RA,AS05G03415-RA,AS08G02493-RA,AS05G02011-RA,AS05G00397-RA,AS08G01185-RA,AS06G02324-RA,AS03G02171-RA,AS02G01229-RA,AS06G00038-RA,AS04G02851-RA,AS08G01016-RA,AS09G01728-RA,AS07G03347-RA,AS05G01863-RA,AS10G00111-RA,AS08G03388-RA,AS07G01374-RA,AS09G02404-RA,AS03G02983-RA,AS06G00321-RA,AS03G02551-RA,AS04G02344-RA,AS02G01…	0.0301094677842602
138	BP	GO:0009267	cellular response to starvation	AS04G00646-RA,AS09G01065-RA,AS02G03562-RA,AS11G00774-RA,AS07G01446-RA,AS05G03415-RA,AS08G02493-RA,AS05G02011-RA,AS05G00397-RA,AS08G01185-RA,AS06G02324-RA,AS03G02171-RA,AS02G01229-RA,AS06G00038-RA,AS04G02851-RA,AS08G01016-RA,AS09G01728-RA,AS07G03347-RA,AS05G01863-RA,AS10G00111-RA,AS08G03388-RA,AS07G01374-RA,AS09G02404-RA,AS03G02983-RA,AS03G02551-RA,AS04G02344-RA,AS02G01827-RA,AS10G00664-RA,AS06G02…	0.0303585812657468
139	MF	GO:0003680	minor groove of adenine-thymine-rich DNA binding	AS08G00725-RA,AS02G03317-RA,AS08G01983-RA,AS06G00281-RA,AS08G02114-RA,AS08G00727-RA,AS04G02014-RA	0.0313343769084663
140	MF	GO:0004805	trehalose-phosphatase activity	AS04G03615-RA,AS03G00695-RA,AS04G02216-RA,AS06G00547-RA,AS05G01852-RA,AS08G02149-RA,AS09G00123-RA	0.0313343769084663
141	BP	GO:0009867	jasmonic acid mediated signaling pathway	AS01G03495-RA,AS08G00595-RA,AS06G03379-RA,AS03G01743-RA,AS05G02093-RA,AS04G00212-RA,AS03G02124-RA,AS08G00834-RA,AS07G03192-RA,AS11G01951-RA,AS02G00852-RA,AS07G01374-RA,AS02G03804-RA,AS08G01240-RA,AS08G00835-RA,AS03G00354-RA,AS01G00309-RA,AS09G02126-RA,AS02G01356-RA,AS11G01504-RA,AS10G00710-RA,AS03G00197-RA,AS01G02041-RA,AS08G01873-RA,AS04G00198-RA,AS07G00717-RA,AS10G00617-RA,AS09G01946-RA,AS01G01…	0.0315069840064203
142	MF	GO:0016758	hexosyltransferase activity	AS08G00192-RA,AS07G02652-RA,AS11G01054-RA,AS05G03183-RA,AS03G01636-RA,AS08G02989-RA,AS07G02435-RA,AS04G01364-RA,AS02G03148-RA,AS08G02333-RA,AS01G02014-RA,AS02G01728-RA,AS04G03294-RA,AS07G00973-RA,AS04G02915-RA,AS07G00526-RA,AS10G02988-RA,AS01G00663-RA,AS04G01135-RA,AS05G00042-RA,AS04G02912-RA,AS07G02473-RA,AS11G02360-RA,AS02G03214-RA,AS01G02015-RA,AS08G03750-RA,AS06G02474-RA,AS04G01317-RA,AS10G01…	0.032788784832116
143	BP	GO:0055081	anion homeostasis	AS07G00118-RA,AS08G01185-RA,AS01G03419-RA,AS07G01374-RA,AS10G00710-RA,AS03G00501-RA,AS05G02191-RA,AS07G01340-RA,AS07G01353-RA,AS03G01724-RA,AS07G02009-RA,AS09G00475-RA,AS06G00546-RA,AS01G03662-RA,AS07G00098-RA,AS07G02008-RA,AS05G03476-RA,AS05G01171-RA,AS05G03527-RA,AS09G01506-RA	0.0342958553470383
144	BP	GO:0009610	response to symbiotic fungus	AS05G01701-RA,AS10G01060-RA,AS05G01927-RA,AS05G00769-RA,AS04G02607-RA,AS05G01790-RA,AS03G00346-RA,AS09G00724-RA,AS06G00765-RA,AS10G01066-RA	0.0350175248561444
145	BP	GO:0098655	cation transmembrane transport	AS02G01376-RA,AS10G00067-RA,AS05G01659-RA,AS04G02230-RA,AS06G01894-RA,AS09G01065-RA,AS01G02472-RA,AS06G03390-RA,AS03G02281-RA,AS06G03379-RA,AS08G00460-RA,AS06G03572-RA,AS04G03264-RA,AS03G00780-RA,AS07G02795-RA,AS01G03438-RA,AS02G02965-RA,AS09G02562-RA,AS02G03048-RA,AS09G01561-RA,AS08G02302-RA,AS04G00078-RA,AS06G00852-RA,AS02G01004-RA,AS10G02794-RA,AS01G02550-RA,AS01G02917-RA,AS08G01507-RA,AS02G03…	0.035470769306519
146	BP	GO:0005991	trehalose metabolic process	AS04G03615-RA,AS05G02988-RA,AS03G00695-RA,AS06G03487-RA,AS04G02216-RA,AS06G00547-RA,AS01G01847-RA,AS10G02943-RA,AS05G01852-RA,AS01G03581-RA,AS08G02149-RA,AS09G00123-RA,AS06G01669-RA	0.0367275506841697
147	BP	GO:0042447	hormone catabolic process	AS06G00940-RA,AS03G02434-RA,AS02G03209-RA,AS03G00755-RA,AS01G03184-RA,AS09G02931-RA,AS08G03959-RA,AS05G03772-RA,AS01G02678-RA,AS11G02533-RA,AS09G01022-RA,AS01G03026-RA,AS04G03078-RA	0.0367275506841697
148	BP	GO:0042391	regulation of membrane potential	AS06G03572-RA,AS09G01561-RA,AS10G02706-RA,AS01G02826-RA,AS01G03228-RA,AS06G00383-RA,AS05G03442-RA,AS02G01572-RA,AS11G01276-RA,AS02G03677-RA,AS02G02328-RA,AS02G00531-RA,AS01G03715-RA,AS10G02116-RA,AS10G00203-RA,AS02G01181-RA,AS10G00204-RA,AS02G00686-RA,AS08G02610-RA,AS08G01542-RA,AS06G02894-RA,AS09G00405-RA,AS04G01561-RA	0.0369466420328482
149	BP	GO:0098771	inorganic ion homeostasis	AS02G01385-RA,AS09G01065-RA,AS07G03399-RA,AS07G00701-RA,AS07G00118-RA,AS05G00447-RA,AS08G01185-RA,AS08G02195-RA,AS06G02324-RA,AS07G02795-RA,AS07G01831-RA,AS01G03419-RA,AS09G01561-RA,AS02G01004-RA,AS05G03279-RA,AS02G00164-RA,AS07G03347-RA,AS05G00082-RA,AS08G00562-RA,AS07G01374-RA,AS03G00181-RA,AS08G03804-RA,AS10G00435-RA,AS01G02826-RA,AS08G00174-RA,AS06G02354-RA,AS10G01481-RA,AS02G02608-RA,AS10G00…	0.0404999440359725
150	BP	GO:0098754	detoxification	AS06G02919-RA,AS08G03009-RA,AS11G02355-RA,AS01G00651-RA,AS09G00319-RA,AS02G03735-RA,AS01G00035-RA,AS05G01444-RA,AS02G03783-RA,AS02G02607-RA,AS11G01071-RA,AS07G02640-RA,AS10G02600-RA,AS03G02070-RA,AS10G00416-RA,AS11G02363-RA,AS09G00161-RA,AS06G01120-RA,AS02G01434-RA,AS07G02916-RA,AS05G00277-RA,AS01G02152-RA,AS05G00769-RA,AS09G00909-RA,AS04G01902-RA,AS01G00044-RA,AS02G03786-RA,AS04G02607-RA,AS05G02…	0.0416084534130823
151	BP	GO:0006855	xenobiotic transmembrane transport	AS10G01414-RA,AS03G02304-RA,AS10G01083-RA,AS09G01065-RA,AS02G00313-RA,AS03G02281-RA,AS05G00459-RA,AS08G00460-RA,AS07G00701-RA,AS07G03532-RA,AS04G00078-RA,AS06G00852-RA,AS02G01323-RA,AS01G02550-RA,AS02G00798-RA,AS08G00556-RA,AS03G00181-RA,AS05G01082-RA,AS03G02590-RA,AS05G01175-RA,AS02G03234-RA,AS02G02233-RA,AS05G00133-RA,AS05G01249-RA,AS10G01361-RA,AS01G00507-RA,AS03G00501-RA,AS11G02515-RA,AS10G01…	0.0425036387706404
152	MF	GO:0016798	hydrolase activity, acting on glycosyl bonds	AS02G02347-RA,AS04G00569-RA,AS10G01838-RA,AS06G02919-RA,AS08G02978-RA,AS01G00070-RA,AS09G00741-RA,AS10G00041-RA,AS08G03796-RA,AS08G00705-RA,AS11G02137-RA,AS07G03048-RA,AS03G01063-RA,AS11G01010-RA,AS03G00672-RA,AS03G01787-RA,AS01G00561-RA,AS06G01280-RA,AS09G00416-RA,AS07G00695-RA,AS02G01865-RA,AS04G02739-RA,AS05G03630-RA,AS01G02335-RA,AS04G02831-RA,AS05G03367-RA,AS05G01653-RA,AS07G03367-RA,AS05G00…	0.0425036387706404
153	BP	GO:0042908	xenobiotic transport	AS10G01414-RA,AS03G02304-RA,AS10G01083-RA,AS09G01065-RA,AS02G00313-RA,AS03G02281-RA,AS05G00459-RA,AS08G00460-RA,AS07G00701-RA,AS07G03532-RA,AS04G00078-RA,AS06G00852-RA,AS02G01323-RA,AS01G02550-RA,AS02G00798-RA,AS08G00556-RA,AS03G00181-RA,AS05G01082-RA,AS03G02590-RA,AS05G01175-RA,AS02G03234-RA,AS02G02233-RA,AS05G00133-RA,AS05G01249-RA,AS10G01361-RA,AS01G00507-RA,AS03G00501-RA,AS11G02515-RA,AS10G01…	0.0425036387706404
154	BP	GO:0010015	root morphogenesis	AS10G00067-RA,AS10G01083-RA,AS08G02130-RA,AS01G01757-RA,AS07G01828-RA,AS07G00701-RA,AS07G01052-RA,AS01G02014-RA,AS02G02275-RA,AS03G02171-RA,AS01G01402-RA,AS04G03253-RA,AS02G02941-RA,AS01G02902-RA,AS02G01323-RA,AS05G02471-RA,AS08G01987-RA,AS08G03415-RA,AS07G01900-RA,AS03G02705-RA,AS05G01653-RA,AS07G01374-RA,AS03G00181-RA,AS01G02015-RA,AS06G00925-RA,AS09G00722-RA,AS01G03145-RA,AS06G00321-RA,AS02G03…	0.0433480662699307
155	BP	GO:0010016	shoot system morphogenesis	AS01G00482-RA,AS03G01834-RA,AS08G00777-RA,AS04G02779-RA,AS04G02873-RA,AS04G03615-RA,AS07G02983-RA,AS10G01532-RA,AS06G03472-RA,AS06G00080-RA,AS01G02014-RA,AS09G02751-RA,AS01G01402-RA,AS04G03253-RA,AS01G00043-RA,AS08G00214-RA,AS09G00630-RA,AS04G00535-RA,AS06G01236-RA,AS04G03322-RA,AS03G02637-RA,AS05G00082-RA,AS11G00324-RA,AS08G00953-RA,AS01G01334-RA,AS02G00852-RA,AS01G02015-RA,AS05G00815-RA,AS11G01…	0.0433480662699307
156	BP	GO:1900057	positive regulation of leaf senescence	AS01G01901-RA,AS04G01097-RA,AS06G02623-RA,AS10G02583-RA,AS05G00256-RA,AS01G00286-RA,AS06G00024-RA,AS04G01855-RA,AS01G00028-RA,AS10G00143-RA,AS01G00365-RA	0.0455708908151188
157	BP	GO:1905623	positive regulation of leaf development	AS01G01901-RA,AS04G01097-RA,AS06G02623-RA,AS10G02583-RA,AS05G00256-RA,AS01G00286-RA,AS06G00024-RA,AS04G01855-RA,AS01G00028-RA,AS10G00143-RA,AS01G00365-RA	0.0455708908151188
158	BP	GO:0009739	response to gibberellin	AS11G02355-RA,AS02G02948-RA,AS06G03230-RA,AS03G01743-RA,AS05G02093-RA,AS02G00963-RA,AS08G00705-RA,AS02G00605-RA,AS07G02614-RA,AS01G00115-RA,AS09G02843-RA,AS05G03296-RA,AS04G00565-RA,AS01G01194-RA,AS07G01374-RA,AS01G01935-RA,AS10G00416-RA,AS04G00821-RA,AS06G01386-RA,AS11G02363-RA,AS05G00078-RA,AS01G00309-RA,AS01G03706-RA,AS10G00710-RA,AS05G01648-RA,AS09G01439-RA,AS01G00336-RA,AS06G02612-RA,AS06G02…	0.0460649947598406
159	BP	GO:0090558	plant epidermis development	AS10G01083-RA,AS08G02130-RA,AS03G01834-RA,AS08G00777-RA,AS07G03142-RA,AS07G01828-RA,AS06G03472-RA,AS07G01052-RA,AS02G02275-RA,AS01G03214-RA,AS01G01402-RA,AS04G03253-RA,AS04G01486-RA,AS02G01323-RA,AS09G01823-RA,AS05G02471-RA,AS08G02659-RA,AS07G01900-RA,AS03G02705-RA,AS01G02586-RA,AS05G00256-RA,AS02G03804-RA,AS01G01935-RA,AS04G03727-RA,AS02G00179-RA,AS05G01807-RA,AS07G03626-RA,AS04G03471-RA,AS01G03…	0.048571618143773
160	BP	GO:0097237	cellular response to toxic substance	AS08G03009-RA,AS02G00053-RA,AS01G00651-RA,AS09G00319-RA,AS02G03735-RA,AS01G00035-RA,AS05G01444-RA,AS02G02607-RA,AS11G01071-RA,AS07G02640-RA,AS11G01951-RA,AS03G02070-RA,AS08G02180-RA,AS08G00202-RA,AS09G00161-RA,AS06G01120-RA,AS03G00354-RA,AS02G01434-RA,AS07G02916-RA,AS05G00277-RA,AS01G02948-RA,AS01G02152-RA,AS05G00769-RA,AS09G00909-RA,AS04G01902-RA,AS06G01981-RA,AS01G00044-RA,AS02G03786-RA,AS07G00…	0.0489578644847884
161	BP	GO:0005982	starch metabolic process	AS03G01682-RA,AS06G03877-RA,AS05G03183-RA,AS08G02978-RA,AS02G03148-RA,AS05G01042-RA,AS10G01060-RA,AS04G03294-RA,AS03G01787-RA,AS01G00561-RA,AS07G01597-RA,AS04G03389-RA,AS03G02637-RA,AS05G02342-RA,AS01G01002-RA,AS08G02427-RA,AS08G00870-RA,AS02G01769-RA,AS07G01546-RA,AS10G01066-RA	0.049664554902743
162	MF	GO:0008324	cation transmembrane transporter activity	AS02G01376-RA,AS10G00067-RA,AS04G02230-RA,AS06G01894-RA,AS09G01065-RA,AS01G02472-RA,AS06G03390-RA,AS03G02281-RA,AS06G03379-RA,AS08G00460-RA,AS06G03572-RA,AS04G03264-RA,AS03G00780-RA,AS07G02795-RA,AS01G03438-RA,AS02G02965-RA,AS09G02562-RA,AS02G03048-RA,AS04G00078-RA,AS06G00852-RA,AS02G01004-RA,AS01G02550-RA,AS01G02917-RA,AS02G03783-RA,AS08G03415-RA,AS06G02764-RA,AS02G00798-RA,AS10G02706-RA,AS08G02…	0.049664554902743
163	MF	GO:0046873	metal ion transmembrane transporter activity	AS02G01376-RA,AS04G02230-RA,AS09G01065-RA,AS06G03379-RA,AS06G03572-RA,AS04G03264-RA,AS07G02795-RA,AS02G02965-RA,AS04G00078-RA,AS02G01004-RA,AS01G02917-RA,AS02G03783-RA,AS06G02764-RA,AS10G02706-RA,AS08G02855-RA,AS08G00562-RA,AS08G02647-RA,AS08G03804-RA,AS06G01070-RA,AS02G02608-RA,AS06G00383-RA,AS05G03442-RA,AS03G00897-RA,AS11G01538-RA,AS05G02727-RA,AS01G02930-RA,AS02G01572-RA,AS08G01282-RA,AS02G01…	0.049664554902743

## Sheet: DEGs-A10vsA7 （KRGG）
No.	ID	Description	GeneRatio	BgRatio	pvalue	p.adjust	qvalue	geneID	Count	Ratio
1	ko00940	Phenylpropanoid biosynthesis	108/2493	227/14627	7.79480567222094e-27	3.00879498947728e-24	2.17434052961952e-24	AS01G02667-RA/AS06G00953-RA/AS11G02242-RA/AS08G03009-RA/AS01G03632-RA/AS09G00633-RA/AS01G02476-RA/AS08G02480-RA/AS06G02552-RA/AS06G03766-RA/AS06G00954-RA/AS08G03784-RA/AS05G00657-RA/AS07G03036-RA/AS09G00884-RA/AS08G03457-RA/AS05G01256-RA/AS07G00512-RA/AS01G00651-RA/AS10G01761-RA/AS09G00319-RA/AS01G00171-RA/AS07G02833-RA/AS06G00355-RA/AS09G00734-RA/AS05G03210-RA/AS06G00357-RA/AS01G02037-RA/AS01G01…	108	0.0433212996389892
2	ko04936	Alcoholic liver disease	118/2493	356/14627	5.54993456659515e-14	7.803494991901e-12	5.63928599087474e-12	AS08G02690-RA/AS08G02130-RA/AS11G02242-RA/AS03G02955-RA/AS04G02112-RA/AS01G01757-RA/AS11G00957-RA/AS05G01690-RA/AS01G02476-RA/AS07G01828-RA/AS02G03052-RA/AS05G02626-RA/AS03G00923-RA/AS02G00567-RA/AS11G01694-RA/AS01G02623-RA/AS06G02590-RA/AS06G03369-RA/AS07G00571-RA/AS07G03093-RA/AS04G01628-RA/AS09G01686-RA/AS07G01723-RA/AS06G02683-RA/AS04G01320-RA/AS08G01507-RA/AS11G00374-RA/AS03G00364-RA/AS07G00…	118	0.0473325310870437
3	ko05417	Lipid and atherosclerosis	143/2493	462/14627	6.06489248075207e-14	7.803494991901e-12	5.63928599087474e-12	AS07G02576-RA/AS04G00070-RA/AS08G02690-RA/AS08G02130-RA/AS05G03112-RA/AS03G02955-RA/AS01G01757-RA/AS06G00700-RA/AS11G00957-RA/AS06G03290-RA/AS08G02989-RA/AS05G01690-RA/AS02G03052-RA/AS05G02626-RA/AS02G00567-RA/AS11G01694-RA/AS01G02623-RA/AS01G03034-RA/AS06G03369-RA/AS07G00571-RA/AS10G00413-RA/AS05G02724-RA/AS07G03093-RA/AS04G01628-RA/AS09G01686-RA/AS07G01723-RA/AS06G02683-RA/AS11G00374-RA/AS01G02…	143	0.0573606097071801
4	ko05133	Pertussis	102/2493	298/14627	3.08932034809923e-13	2.45769323921317e-11	1.77608047011587e-11	AS08G02690-RA/AS08G02130-RA/AS03G02955-RA/AS01G01757-RA/AS11G00957-RA/AS05G01690-RA/AS02G03052-RA/AS05G02626-RA/AS02G00567-RA/AS11G01694-RA/AS01G02623-RA/AS06G03369-RA/AS07G00571-RA/AS10G00413-RA/AS07G03093-RA/AS04G01628-RA/AS09G01686-RA/AS07G01723-RA/AS06G02683-RA/AS11G00374-RA/AS03G00364-RA/AS07G00653-RA/AS05G01917-RA/AS04G01148-RA/AS06G02450-RA/AS11G01680-RA/AS04G01222-RA/AS02G00804-RA/AS05G00…	102	0.0409145607701564
5	ko05140	Leishmaniasis	97/2493	278/14627	3.18354046530204e-13	2.45769323921317e-11	1.77608047011587e-11	AS08G02690-RA/AS08G02130-RA/AS03G02955-RA/AS01G01757-RA/AS11G00957-RA/AS05G01690-RA/AS02G03052-RA/AS05G02626-RA/AS02G00567-RA/AS11G01694-RA/AS01G02623-RA/AS06G03369-RA/AS07G00571-RA/AS07G03093-RA/AS04G01628-RA/AS09G01686-RA/AS07G01723-RA/AS06G02683-RA/AS11G00374-RA/AS03G00364-RA/AS07G00653-RA/AS05G01917-RA/AS06G02450-RA/AS11G01680-RA/AS04G01222-RA/AS02G00804-RA/AS04G00613-RA/AS10G02112-RA/AS07G03…	97	0.0389089450461292
6	ko04010	MAPK signaling pathway	123/2493	387/14627	4.72353663443507e-13	2.85981554479871e-11	2.06667880930368e-11	AS07G02576-RA/AS08G02690-RA/AS08G02130-RA/AS03G02955-RA/AS01G01757-RA/AS11G00957-RA/AS05G01690-RA/AS02G03052-RA/AS05G02626-RA/AS02G00567-RA/AS11G01694-RA/AS01G02623-RA/AS06G03369-RA/AS07G00571-RA/AS05G00053-RA/AS01G03721-RA/AS05G02724-RA/AS07G03093-RA/AS04G01628-RA/AS09G01686-RA/AS07G01723-RA/AS06G02683-RA/AS11G00374-RA/AS03G00364-RA/AS07G00653-RA/AS02G01520-RA/AS03G00476-RA/AS05G01917-RA/AS06G02…	123	0.049338146811071
7	ko04620	Toll-like receptor signaling pathway	98/2493	284/14627	5.18619399315829e-13	2.85981554479871e-11	2.06667880930368e-11	AS08G02690-RA/AS08G02130-RA/AS03G02955-RA/AS01G01757-RA/AS11G00957-RA/AS05G01690-RA/AS02G03052-RA/AS05G02626-RA/AS02G00567-RA/AS11G01694-RA/AS01G02623-RA/AS06G03369-RA/AS07G00571-RA/AS05G02724-RA/AS07G03093-RA/AS04G01628-RA/AS09G01686-RA/AS07G01723-RA/AS06G02683-RA/AS11G00374-RA/AS03G00364-RA/AS07G00653-RA/AS05G01917-RA/AS06G02450-RA/AS11G01680-RA/AS04G01222-RA/AS02G00804-RA/AS04G00613-RA/AS10G02…	98	0.0393100681909346
8	ko04064	NF-kappa B signaling pathway	94/2493	274/14627	2.27946968100803e-12	1.09984412108637e-10	7.94815086140957e-11	AS08G02690-RA/AS08G02130-RA/AS03G02955-RA/AS01G01757-RA/AS11G00957-RA/AS05G01690-RA/AS02G03629-RA/AS02G03052-RA/AS05G02626-RA/AS02G00567-RA/AS11G01694-RA/AS01G02623-RA/AS06G03369-RA/AS07G00571-RA/AS07G03093-RA/AS04G01628-RA/AS09G01686-RA/AS07G01723-RA/AS06G02683-RA/AS11G00374-RA/AS03G00364-RA/AS07G00653-RA/AS05G01917-RA/AS06G02450-RA/AS11G01680-RA/AS04G01222-RA/AS02G00804-RA/AS04G00613-RA/AS10G02…	94	0.0377055756117128
9	ko05145	Toxoplasmosis	111/2493	349/14627	6.31407455046315e-12	2.70803641830975e-10	1.95699386651782e-10	AS07G02576-RA/AS08G02690-RA/AS05G01659-RA/AS08G02130-RA/AS03G02955-RA/AS01G01757-RA/AS11G00957-RA/AS05G01690-RA/AS05G02911-RA/AS02G03052-RA/AS05G02626-RA/AS02G00567-RA/AS11G01694-RA/AS01G02623-RA/AS11G00325-RA/AS06G03369-RA/AS07G00571-RA/AS07G03093-RA/AS04G01628-RA/AS09G01686-RA/AS07G01723-RA/AS06G02683-RA/AS11G00374-RA/AS04G00535-RA/AS03G00364-RA/AS07G00653-RA/AS03G00476-RA/AS05G01917-RA/AS06G02…	111	0.0445246690734055
10	ko04624	Toll and Imd signaling pathway	95/2493	286/14627	1.42446160766924e-11	4.99856527782115e-10	3.61227106251051e-10	AS08G02690-RA/AS08G02130-RA/AS03G02955-RA/AS01G01757-RA/AS11G00957-RA/AS05G01690-RA/AS02G03052-RA/AS05G02626-RA/AS02G00567-RA/AS11G01694-RA/AS01G02623-RA/AS06G03369-RA/AS07G00571-RA/AS07G03093-RA/AS04G01628-RA/AS09G01686-RA/AS07G01723-RA/AS06G02683-RA/AS11G00374-RA/AS03G00364-RA/AS07G00653-RA/AS05G01917-RA/AS06G02450-RA/AS11G01680-RA/AS04G01222-RA/AS02G00804-RA/AS04G00613-RA/AS10G02112-RA/AS07G03…	95	0.0381066987565183
11	ko05142	Chagas disease	95/2493	286/14627	1.42446160766924e-11	4.99856527782115e-10	3.61227106251051e-10	AS08G02690-RA/AS08G02130-RA/AS03G02955-RA/AS01G01757-RA/AS11G00957-RA/AS05G01690-RA/AS02G03052-RA/AS05G02626-RA/AS02G00567-RA/AS11G01694-RA/AS01G02623-RA/AS06G03369-RA/AS07G00571-RA/AS07G03093-RA/AS04G01628-RA/AS09G01686-RA/AS07G01723-RA/AS06G02683-RA/AS11G00374-RA/AS03G00364-RA/AS07G00653-RA/AS05G01917-RA/AS06G02450-RA/AS11G01680-RA/AS04G01222-RA/AS02G00804-RA/AS05G00001-RA/AS04G00613-RA/AS10G02…	95	0.0381066987565183
12	ko05161	Hepatitis B	100/2493	308/14627	1.87306397510491e-11	6.02502245325413e-10	4.35405222283159e-10	AS08G02690-RA/AS08G02130-RA/AS03G02955-RA/AS01G01757-RA/AS11G00957-RA/AS05G01690-RA/AS02G03052-RA/AS05G02626-RA/AS02G00567-RA/AS11G01694-RA/AS01G02623-RA/AS06G03369-RA/AS07G00571-RA/AS07G03093-RA/AS04G01628-RA/AS09G01686-RA/AS07G01723-RA/AS06G01216-RA/AS06G02683-RA/AS11G00374-RA/AS03G00364-RA/AS07G00653-RA/AS05G01917-RA/AS06G02450-RA/AS11G01680-RA/AS04G01222-RA/AS02G00804-RA/AS01G02586-RA/AS04G00…	100	0.0401123144805455
13	ko04722	Neurotrophin signaling pathway	109/2493	348/14627	2.8104772300247e-11	8.34495546761181e-10	6.03057867171292e-10	AS08G02690-RA/AS08G02130-RA/AS03G02955-RA/AS01G01757-RA/AS11G00957-RA/AS05G01690-RA/AS02G03052-RA/AS05G02626-RA/AS02G00567-RA/AS11G01694-RA/AS01G02623-RA/AS06G03369-RA/AS07G00571-RA/AS05G00053-RA/AS10G00413-RA/AS05G02724-RA/AS07G03093-RA/AS04G01628-RA/AS09G01686-RA/AS07G01723-RA/AS06G02683-RA/AS11G00374-RA/AS03G00364-RA/AS07G00653-RA/AS05G01917-RA/AS04G01148-RA/AS06G02450-RA/AS11G01680-RA/AS04G01…	109	0.0437224227837946
14	ko05135	Yersinia infection	98/2493	314/14627	3.51649537182793e-10	9.6954800966113e-09	7.00655092883009e-09	AS08G02690-RA/AS08G02130-RA/AS03G02955-RA/AS01G01757-RA/AS11G00957-RA/AS05G01690-RA/AS02G03052-RA/AS05G02626-RA/AS02G00567-RA/AS11G01694-RA/AS01G02623-RA/AS06G03369-RA/AS07G00571-RA/AS05G02724-RA/AS07G03093-RA/AS04G01628-RA/AS09G01686-RA/AS07G01723-RA/AS06G02683-RA/AS11G00374-RA/AS03G00364-RA/AS07G00653-RA/AS05G01917-RA/AS06G02450-RA/AS11G01680-RA/AS04G01222-RA/AS02G00804-RA/AS04G00613-RA/AS10G02…	98	0.0393100681909346
15	ko00199	Cytochrome P450 [BR:ko00199]	101/2493	330/14627	6.33165746721769e-10	1.62934652156402e-08	1.17746612548259e-08	AS08G02096-RA/AS03G03071-RA/AS05G03438-RA/AS07G02696-RA/AS08G02989-RA/AS09G00043-RA/AS05G03599-RA/AS05G00666-RA/AS04G02302-RA/AS02G02948-RA/AS04G01453-RA/AS01G03018-RA/AS02G00872-RA/AS04G00162-RA/AS01G02211-RA/AS11G00944-RA/AS02G00410-RA/AS05G01289-RA/AS03G00649-RA/AS05G00665-RA/AS01G01527-RA/AS11G01716-RA/AS06G01052-RA/AS01G02780-RA/AS07G01482-RA/AS05G00251-RA/AS03G00648-RA/AS02G01497-RA/AS02G00…	101	0.040513437625351
16	ko05162	Measles	103/2493	342/14627	1.15570376186906e-09	2.7881353255091e-08	2.01487826904803e-08	AS07G02576-RA/AS08G02690-RA/AS08G02130-RA/AS03G02955-RA/AS01G01757-RA/AS11G00957-RA/AS05G01690-RA/AS02G03629-RA/AS02G03052-RA/AS05G02626-RA/AS02G00567-RA/AS11G01694-RA/AS01G02623-RA/AS06G03369-RA/AS07G00571-RA/AS07G03093-RA/AS04G01628-RA/AS09G01686-RA/AS07G01723-RA/AS06G02683-RA/AS11G00374-RA/AS03G00364-RA/AS07G00653-RA/AS03G00476-RA/AS05G01917-RA/AS06G02450-RA/AS11G01680-RA/AS04G01222-RA/AS02G00…	103	0.0413156839149619
17	ko04626	Plant-pathogen interaction	88/2493	278/14627	1.27812919184262e-09	2.90210510618382e-08	2.09723985039191e-08	AS05G01659-RA/AS05G03112-RA/AS04G00993-RA/AS06G03290-RA/AS01G02104-RA/AS05G01690-RA/AS01G01623-RA/AS05G02911-RA/AS04G02942-RA/AS07G00934-RA/AS09G02754-RA/AS11G01039-RA/AS03G02457-RA/AS11G00325-RA/AS10G00413-RA/AS07G03359-RA/AS01G00944-RA/AS08G01864-RA/AS08G01535-RA/AS07G02769-RA/AS04G00535-RA/AS05G00247-RA/AS03G00048-RA/AS05G01917-RA/AS04G01148-RA/AS10G02706-RA/AS05G03569-RA/AS02G03252-RA/AS07G00…	88	0.0352988367428801
18	ko05164	Influenza A	91/2493	293/14627	1.97366768351267e-09	4.23242069908828e-08	3.05860781363075e-08	AS08G02130-RA/AS03G02955-RA/AS11G00957-RA/AS05G01690-RA/AS02G03052-RA/AS06G00784-RA/AS05G02626-RA/AS02G00567-RA/AS09G01068-RA/AS01G02623-RA/AS06G03252-RA/AS06G02995-RA/AS05G01822-RA/AS06G03369-RA/AS07G00571-RA/AS07G03093-RA/AS04G01628-RA/AS09G01686-RA/AS07G01723-RA/AS06G02683-RA/AS07G00653-RA/AS05G01917-RA/AS06G02450-RA/AS11G01680-RA/AS04G01222-RA/AS04G00613-RA/AS10G02112-RA/AS07G03648-RA/AS03G02…	91	0.0365022061772964
19	ko05152	Tuberculosis	121/2493	426/14627	2.25293271527059e-09	4.57701067418129e-08	3.30762974818119e-08	AS04G00070-RA/AS08G02690-RA/AS08G02130-RA/AS03G02955-RA/AS01G01757-RA/AS11G00957-RA/AS05G01690-RA/AS02G03052-RA/AS05G02626-RA/AS02G00567-RA/AS11G01694-RA/AS01G02623-RA/AS08G03013-RA/AS06G03369-RA/AS07G00571-RA/AS10G00413-RA/AS07G03093-RA/AS04G01628-RA/AS09G01686-RA/AS07G01723-RA/AS06G02683-RA/AS08G02587-RA/AS11G00374-RA/AS03G00364-RA/AS07G00653-RA/AS02G01520-RA/AS05G01917-RA/AS04G01148-RA/AS06G02…	121	0.0485359005214601
20	ko05168	Herpes simplex virus 1 infection	95/2493	312/14627	2.74460891537421e-09	5.29709520667222e-08	3.82800717144297e-08	AS08G02690-RA/AS08G02130-RA/AS03G02955-RA/AS01G01757-RA/AS11G00957-RA/AS05G01690-RA/AS02G03052-RA/AS05G02626-RA/AS02G00567-RA/AS11G01694-RA/AS01G02623-RA/AS06G03369-RA/AS07G00571-RA/AS07G03093-RA/AS04G01628-RA/AS09G01686-RA/AS07G01723-RA/AS06G02683-RA/AS11G00374-RA/AS03G00364-RA/AS07G00653-RA/AS05G01917-RA/AS06G02450-RA/AS11G01680-RA/AS04G01222-RA/AS02G00804-RA/AS04G00613-RA/AS10G02112-RA/AS07G03…	95	0.0381066987565183
21	ko05170	Human immunodeficiency virus 1 infection	115/2493	406/14627	6.71294298414742e-09	1.23390285327662e-07	8.91694180851663e-08	AS08G02690-RA/AS08G02130-RA/AS03G02955-RA/AS01G01757-RA/AS11G00957-RA/AS05G01690-RA/AS02G03052-RA/AS05G02626-RA/AS02G00567-RA/AS11G01694-RA/AS01G02623-RA/AS06G03369-RA/AS07G00571-RA/AS10G00413-RA/AS05G02724-RA/AS07G03093-RA/AS04G01628-RA/AS09G01686-RA/AS07G01723-RA/AS06G02683-RA/AS11G00374-RA/AS03G00364-RA/AS07G00653-RA/AS02G01520-RA/AS07G02395-RA/AS05G01917-RA/AS04G01148-RA/AS06G02450-RA/AS11G01…	115	0.0461291616526274
22	ko04075	Plant hormone signal transduction	115/2493	407/14627	7.81887846531345e-09	1.37185776709591e-07	9.91388896319649e-08	AS11G01447-RA/AS04G03593-RA/AS07G02566-RA/AS04G00246-RA/AS07G02471-RA/AS10G00126-RA/AS04G02050-RA/AS07G02479-RA/AS04G00842-RA/AS07G01140-RA/AS02G00963-RA/AS05G02940-RA/AS01G01402-RA/AS04G00212-RA/AS07G03590-RA/AS06G00234-RA/AS08G01699-RA/AS01G01793-RA/AS05G03411-RA/AS01G02945-RA/AS11G02001-RA/AS08G00834-RA/AS04G03044-RA/AS04G00746-RA/AS02G02444-RA/AS08G02967-RA/AS02G02454-RA/AS10G00144-RA/AS06G02…	115	0.0461291616526274
23	ko05132	Salmonella infection	127/2493	465/14627	1.23108005422002e-08	2.06607348229968e-07	1.49307191930574e-07	AS08G00393-RA/AS08G02690-RA/AS08G02130-RA/AS05G03112-RA/AS03G02955-RA/AS01G01757-RA/AS11G00957-RA/AS06G03290-RA/AS05G01690-RA/AS02G03052-RA/AS05G02626-RA/AS02G00567-RA/AS11G01694-RA/AS01G02623-RA/AS10G00436-RA/AS02G03343-RA/AS06G03369-RA/AS07G00571-RA/AS05G02724-RA/AS07G03093-RA/AS04G01628-RA/AS09G01686-RA/AS07G01723-RA/AS06G02683-RA/AS11G00374-RA/AS04G03106-RA/AS03G00364-RA/AS07G00653-RA/AS07G02…	127	0.0509426393902928
24	ko04016	MAPK signaling pathway - plant	73/2493	227/14627	1.54690821940585e-08	2.48794405287774e-07	1.79794157080066e-07	AS07G02566-RA/AS08G00777-RA/AS05G01690-RA/AS07G02471-RA/AS10G00126-RA/AS02G00963-RA/AS01G01793-RA/AS05G03411-RA/AS05G02110-RA/AS10G00413-RA/AS11G02001-RA/AS02G02444-RA/AS02G02454-RA/AS08G01864-RA/AS08G01535-RA/AS02G03783-RA/AS03G00048-RA/AS05G01917-RA/AS04G01148-RA/AS02G03252-RA/AS08G01220-RA/AS02G03551-RA/AS05G00256-RA/AS07G03324-RA/AS02G03728-RA/AS08G00830-RA/AS02G03455-RA/AS01G02920-RA/AS09G02…	73	0.0292819895707982
25	ko05130	Pathogenic Escherichia coli infection	112/2493	401/14627	2.44895982969937e-08	3.78119397705582e-07	2.73252359945403e-07	AS08G02690-RA/AS08G02130-RA/AS03G02955-RA/AS01G01757-RA/AS11G00957-RA/AS05G01690-RA/AS02G03052-RA/AS05G02626-RA/AS02G00567-RA/AS11G01694-RA/AS01G02623-RA/AS10G00436-RA/AS02G03343-RA/AS04G01744-RA/AS06G03369-RA/AS07G00571-RA/AS05G02724-RA/AS07G03093-RA/AS04G01628-RA/AS09G01686-RA/AS07G01723-RA/AS06G02683-RA/AS11G00374-RA/AS03G00364-RA/AS07G00653-RA/AS05G01917-RA/AS06G02450-RA/AS11G01680-RA/AS04G01…	112	0.044925792218211
26	ko05169	Epstein-Barr virus infection	104/2493	372/14627	7.33284574230437e-08	1.08864556020365e-06	7.86722316482048e-07	AS08G02690-RA/AS08G02130-RA/AS03G02955-RA/AS01G01757-RA/AS11G00957-RA/AS05G01690-RA/AS02G03052-RA/AS05G02626-RA/AS02G00567-RA/AS11G01694-RA/AS01G02623-RA/AS06G03369-RA/AS07G00571-RA/AS05G02724-RA/AS07G03093-RA/AS04G01628-RA/AS09G01686-RA/AS07G01723-RA/AS06G01216-RA/AS06G02683-RA/AS11G00374-RA/AS03G00364-RA/AS07G00653-RA/AS05G01917-RA/AS06G02450-RA/AS11G01680-RA/AS04G01222-RA/AS02G00804-RA/AS01G02…	104	0.0417168070597673
27	ko00196	Photosynthesis - antenna proteins	19/2493	34/14627	3.19738447160602e-07	4.57107557792564e-06	3.30334068216606e-06	AS05G03579-RA/AS03G00615-RA/AS01G03040-RA/AS03G00612-RA/AS10G01176-RA/AS09G02198-RA/AS09G00108-RA/AS10G01920-RA/AS09G02188-RA/AS09G02183-RA/AS07G03326-RA/AS11G00121-RA/AS08G01540-RA/AS07G00860-RA/AS11G00231-RA/AS02G00042-RA/AS04G03596-RA/AS11G00119-RA/AS06G01935-RA	19	0.00762133975130365
28	ko04621	NOD-like receptor signaling pathway	89/2493	332/14627	4.27605143714944e-06	5.89484233835602e-05	4.25997605580678e-05	AS08G00393-RA/AS08G02130-RA/AS06G02141-RA/AS03G02955-RA/AS11G00957-RA/AS05G01690-RA/AS02G03052-RA/AS05G02626-RA/AS02G00567-RA/AS01G02623-RA/AS06G03369-RA/AS07G00571-RA/AS07G03093-RA/AS04G01628-RA/AS09G01686-RA/AS07G01723-RA/AS06G02683-RA/AS07G00653-RA/AS05G01917-RA/AS06G02450-RA/AS11G01680-RA/AS04G01222-RA/AS04G00613-RA/AS10G02112-RA/AS07G03648-RA/AS03G02684-RA/AS10G00225-RA/AS03G01242-RA/AS01G03…	89	0.0356999598876855
29	ko05034	Alcoholism	45/2493	142/14627	1.29522106612032e-05	0.000172398390180153	0.000124585692385439	AS01G03539-RA/AS08G02828-RA/AS09G02135-RA/AS08G01490-RA/AS04G03328-RA/AS02G00875-RA/AS10G00413-RA/AS08G01489-RA/AS07G00027-RA/AS01G01176-RA/AS04G01148-RA/AS05G00001-RA/AS08G01488-RA/AS07G03324-RA/AS02G00596-RA/AS02G00599-RA/AS03G00491-RA/AS02G00976-RA/AS02G01910-RA/AS03G00483-RA/AS08G01873-RA/AS02G01134-RA/AS05G01245-RA/AS09G02541-RA/AS07G02047-RA/AS01G01174-RA/AS08G01113-RA/AS06G02859-RA/AS01G01…	45	0.0180505415162455
30	ko00980	Metabolism of xenobiotics by cytochrome P450	33/2493	93/14627	1.36892026808726e-05	0.000176134407827227	0.000127285568787061	AS03G03071-RA/AS03G02968-RA/AS03G00454-RA/AS04G02112-RA/AS08G02989-RA/AS11G02355-RA/AS03G00438-RA/AS09G00786-RA/AS03G02967-RA/AS02G00173-RA/AS01G02780-RA/AS01G00731-RA/AS05G02096-RA/AS07G01482-RA/AS10G00416-RA/AS07G01164-RA/AS03G00141-RA/AS01G01128-RA/AS11G02363-RA/AS11G02362-RA/AS07G01174-RA/AS11G00382-RA/AS01G02713-RA/AS01G01973-RA/AS11G02111-RA/AS07G00194-RA/AS07G03447-RA/AS06G01704-RA/AS08G00…	33	0.01323706377858
31	ko01040	Biosynthesis of unsaturated fatty acids	25/2493	64/14627	2.30328656619652e-05	0.000286796327274792	0.000207256685922607	AS03G00485-RA/AS10G01244-RA/AS07G03224-RA/AS01G01959-RA/AS11G01546-RA/AS03G00488-RA/AS06G00509-RA/AS05G01855-RA/AS03G00440-RA/AS02G00133-RA/AS03G00486-RA/AS02G00275-RA/AS03G00487-RA/AS02G01893-RA/AS05G03644-RA/AS03G00439-RA/AS06G03537-RA/AS01G01440-RA/AS05G03645-RA/AS11G01811-RA/AS04G01427-RA/AS05G03643-RA/AS11G01807-RA/AS11G01812-RA/AS02G01677-RA	25	0.0100280786201364
32	ko00982	Drug metabolism - cytochrome P450	24/2493	61/14627	2.90266818395416e-05	0.000350134349689471	0.000253028641035478	AS03G03071-RA/AS03G02968-RA/AS03G00454-RA/AS04G02112-RA/AS11G02355-RA/AS03G00438-RA/AS09G00786-RA/AS03G02967-RA/AS02G00173-RA/AS11G00868-RA/AS01G00731-RA/AS05G02096-RA/AS10G00416-RA/AS07G01164-RA/AS03G00141-RA/AS11G02363-RA/AS11G02362-RA/AS07G01174-RA/AS11G00382-RA/AS01G02713-RA/AS06G01704-RA/AS08G00391-RA/AS09G00774-RA/AS01G03033-RA	24	0.00962695547533093
33	ko05204	Chemical carcinogenesis - DNA adducts	28/2493	79/14627	6.14396034283167e-05	0.000718657179494857	0.000519345930095819	AS03G03071-RA/AS03G02968-RA/AS03G00454-RA/AS08G02989-RA/AS11G02355-RA/AS09G00786-RA/AS03G02967-RA/AS01G02780-RA/AS01G00731-RA/AS07G01482-RA/AS10G00416-RA/AS07G01164-RA/AS03G00141-RA/AS01G01128-RA/AS11G02363-RA/AS11G02362-RA/AS07G01174-RA/AS01G02713-RA/AS01G01973-RA/AS11G02111-RA/AS07G00194-RA/AS07G03447-RA/AS06G01704-RA/AS08G00391-RA/AS07G02853-RA/AS09G00774-RA/AS04G00952-RA/AS01G03033-RA	28	0.0112314480545527
34	ko00480	Glutathione metabolism	29/2493	86/14627	0.000127564506605303	0.00139990370845669	0.00101165662051001	AS03G02968-RA/AS03G00454-RA/AS11G02355-RA/AS07G00342-RA/AS09G00786-RA/AS03G02967-RA/AS01G02859-RA/AS01G00731-RA/AS10G00416-RA/AS02G03687-RA/AS07G01164-RA/AS03G00141-RA/AS11G02363-RA/AS11G02362-RA/AS07G01174-RA/AS09G00161-RA/AS09G01570-RA/AS02G03033-RA/AS11G02178-RA/AS02G03786-RA/AS07G01722-RA/AS02G03785-RA/AS03G02817-RA/AS06G01704-RA/AS08G00391-RA/AS11G02182-RA/AS09G00774-RA/AS07G00107-RA/AS01G03…	29	0.0116325711993582
35	ko04726	Serotonergic synapse	29/2493	86/14627	0.000127564506605303	0.00139990370845669	0.00101165662051001	AS05G00666-RA/AS08G01490-RA/AS05G00665-RA/AS08G01489-RA/AS01G02780-RA/AS07G01482-RA/AS05G00001-RA/AS08G01488-RA/AS03G02657-RA/AS01G02713-RA/AS10G00037-RA/AS08G01873-RA/AS01G00714-RA/AS07G03444-RA/AS03G03032-RA/AS01G01973-RA/AS05G00423-RA/AS11G02111-RA/AS02G02932-RA/AS07G01564-RA/AS07G03447-RA/AS02G02034-RA/AS08G03683-RA/AS04G03672-RA/AS04G02879-RA/AS07G02432-RA/AS04G02883-RA/AS10G00108-RA/AS10G00…	29	0.0116325711993582
36	ko00500	Starch and sucrose metabolism	57/2493	209/14627	0.000130560967628085	0.00139990370845669	0.00101165662051001	AS03G00537-RA/AS06G03877-RA/AS07G02652-RA/AS05G03183-RA/AS08G01036-RA/AS04G03615-RA/AS09G00741-RA/AS09G01748-RA/AS04G02350-RA/AS02G03148-RA/AS08G00705-RA/AS04G03294-RA/AS08G01680-RA/AS07G00526-RA/AS01G00561-RA/AS07G01597-RA/AS10G00223-RA/AS02G00180-RA/AS02G01865-RA/AS01G02335-RA/AS11G00083-RA/AS03G00731-RA/AS06G02037-RA/AS06G02038-RA/AS03G00308-RA/AS05G03564-RA/AS03G00695-RA/AS08G04016-RA/AS08G02…	57	0.022864019253911
37	ko00073	Cutin, suberine and wax biosynthesis	19/2493	48/14627	0.000175745919738921	0.00183345743295199	0.00132496923842999	AS01G03593-RA/AS02G00410-RA/AS01G03615-RA/AS11G02420-RA/AS08G03005-RA/AS04G00249-RA/AS04G00173-RA/AS03G01869-RA/AS10G02518-RA/AS10G00023-RA/AS02G02804-RA/AS01G02910-RA/AS05G03099-RA/AS01G01069-RA/AS03G01863-RA/AS02G03809-RA/AS06G02692-RA/AS06G02693-RA/AS10G01250-RA	19	0.00762133975130365
38	ko00908	Zeatin biosynthesis	30/2493	92/14627	0.000194392107860999	0.00197461456932488	0.00142697807709597	AS06G00940-RA/AS08G02989-RA/AS07G02435-RA/AS05G00666-RA/AS01G03018-RA/AS01G02014-RA/AS01G02211-RA/AS05G03257-RA/AS03G02754-RA/AS05G00665-RA/AS01G02015-RA/AS09G02931-RA/AS06G00925-RA/AS01G01128-RA/AS06G00926-RA/AS03G00272-RA/AS08G03959-RA/AS05G00423-RA/AS06G03772-RA/AS05G03772-RA/AS01G00159-RA/AS08G03683-RA/AS01G02011-RA/AS09G01022-RA/AS04G02879-RA/AS01G03017-RA/AS02G02094-RA/AS04G02883-RA/AS10G00…	30	0.0120336943441637
39	ko00360	Phenylalanine metabolism	19/2493	49/14627	0.000241610729776214	0.00235305738863956	0.00170046416141119	AS09G01435-RA/AS09G03052-RA/AS08G01490-RA/AS03G02124-RA/AS08G01489-RA/AS06G02256-RA/AS06G03497-RA/AS05G03296-RA/AS06G03441-RA/AS08G01488-RA/AS06G03555-RA/AS06G01386-RA/AS11G00382-RA/AS01G02494-RA/AS09G01800-RA/AS01G02297-RA/AS04G00056-RA/AS02G02034-RA/AS09G01796-RA	19	0.00762133975130365
40	ko00945	Stilbenoid, diarylheptanoid and gingerol biosynthesis	16/2493	38/14627	0.000243840143900472	0.00235305738863956	0.00170046416141119	AS01G03632-RA/AS08G03457-RA/AS10G01761-RA/AS01G01527-RA/AS06G01052-RA/AS08G02081-RA/AS02G03269-RA/AS08G00542-RA/AS02G03270-RA/AS11G02161-RA/AS07G02808-RA/AS06G01888-RA/AS06G01889-RA/AS02G03271-RA/AS01G03056-RA/AS10G01250-RA	16	0.00641797031688728
41	ko00250	Alanine, aspartate and glutamate metabolism	21/2493	57/14627	0.000268218188714732	0.00252517611814357	0.0018248477537716	AS04G03487-RA/AS07G01061-RA/AS05G01317-RA/AS06G02123-RA/AS02G03682-RA/AS05G02011-RA/AS09G01435-RA/AS09G03052-RA/AS02G02905-RA/AS06G03497-RA/AS06G00038-RA/AS04G02995-RA/AS10G01408-RA/AS03G02600-RA/AS02G02031-RA/AS01G02494-RA/AS04G00414-RA/AS08G02660-RA/AS05G02684-RA/AS10G01081-RA/AS03G03018-RA	21	0.00842358604091456
42	ko05031	Amphetamine addiction	21/2493	58/14627	0.000353683843794216	0.00325052294534684	0.00234902803522474	AS08G01490-RA/AS10G00413-RA/AS08G01489-RA/AS02G01520-RA/AS04G01148-RA/AS08G01488-RA/AS07G03324-RA/AS04G03481-RA/AS02G03704-RA/AS02G00976-RA/AS07G02047-RA/AS02G01816-RA/AS06G00686-RA/AS07G03426-RA/AS02G02034-RA/AS06G03256-RA/AS03G02031-RA/AS04G03482-RA/AS04G01789-RA/AS07G02772-RA/AS04G00481-RA	21	0.00842358604091456
43	ko05207	Chemical carcinogenesis - receptor activation	33/2493	109/14627	0.000450497228636787	0.00404031952384268	0.00291978367553398	AS03G03071-RA/AS03G02968-RA/AS05G03112-RA/AS03G00454-RA/AS06G03290-RA/AS08G02989-RA/AS11G02355-RA/AS09G00786-RA/AS03G02967-RA/AS01G02780-RA/AS01G00731-RA/AS07G01482-RA/AS01G01074-RA/AS05G00001-RA/AS10G00416-RA/AS07G01164-RA/AS03G00141-RA/AS01G01128-RA/AS11G02363-RA/AS11G02362-RA/AS07G01174-RA/AS01G02713-RA/AS08G01873-RA/AS01G01973-RA/AS11G02111-RA/AS07G00194-RA/AS07G03447-RA/AS06G01704-RA/AS08G00…	33	0.01323706377858
44	ko00350	Tyrosine metabolism	23/2493	67/14627	0.000460554557121963	0.00404031952384268	0.00291978367553398	AS04G02112-RA/AS07G01179-RA/AS09G01435-RA/AS09G03052-RA/AS03G00438-RA/AS08G01490-RA/AS03G02124-RA/AS02G00173-RA/AS08G01489-RA/AS06G02256-RA/AS06G03497-RA/AS05G02096-RA/AS10G02600-RA/AS06G03441-RA/AS08G01488-RA/AS06G03555-RA/AS01G00140-RA/AS08G01172-RA/AS11G00382-RA/AS01G02494-RA/AS01G02297-RA/AS04G00056-RA/AS02G02034-RA	23	0.00922583233052547
45	ko04922	Glucagon signaling pathway	36/2493	124/14627	0.000615823575905258	0.0050680148581134	0.00366245960567235	AS03G00193-RA/AS07G02652-RA/AS01G00904-RA/AS10G00011-RA/AS01G03749-RA/AS03G00923-RA/AS06G02590-RA/AS02G02884-RA/AS02G03587-RA/AS10G00413-RA/AS08G01507-RA/AS02G01520-RA/AS03G02471-RA/AS04G01148-RA/AS02G00704-RA/AS07G03324-RA/AS02G02696-RA/AS01G01346-RA/AS04G03481-RA/AS02G03704-RA/AS06G00019-RA/AS04G00977-RA/AS08G02713-RA/AS03G00717-RA/AS04G01006-RA/AS02G01816-RA/AS06G00686-RA/AS02G02759-RA/AS06G03…	36	0.0144404332129964
46	ko00950	Isoquinoline alkaloid biosynthesis	15/2493	37/14627	0.000617089892050077	0.0050680148581134	0.00366245960567235	AS07G01179-RA/AS09G01435-RA/AS09G03052-RA/AS08G01490-RA/AS03G02124-RA/AS08G01489-RA/AS06G02256-RA/AS06G03497-RA/AS08G01488-RA/AS06G03555-RA/AS01G00140-RA/AS08G01172-RA/AS01G02494-RA/AS01G02297-RA/AS02G02034-RA	15	0.00601684717208183
47	ko04625	C-type lectin receptor signaling pathway	15/2493	37/14627	0.000617089892050077	0.0050680148581134	0.00366245960567235	AS10G00413-RA/AS02G01520-RA/AS04G01148-RA/AS07G03324-RA/AS04G03481-RA/AS02G03704-RA/AS08G01873-RA/AS06G00686-RA/AS06G03256-RA/AS03G02031-RA/AS07G02432-RA/AS04G03482-RA/AS04G01789-RA/AS07G02772-RA/AS04G00481-RA	15	0.00601684717208183
48	ko01524	Platinum drug resistance	27/2493	88/14627	0.00114434392569988	0.00920243240250319	0.00665024430505412	AS03G02304-RA/AS04G00151-RA/AS03G02968-RA/AS03G00454-RA/AS11G02355-RA/AS09G00786-RA/AS03G02967-RA/AS01G00731-RA/AS02G03783-RA/AS09G00050-RA/AS10G00416-RA/AS07G01164-RA/AS03G00141-RA/AS02G03455-RA/AS11G02363-RA/AS09G01051-RA/AS11G02362-RA/AS07G01174-RA/AS08G01873-RA/AS01G02537-RA/AS06G01704-RA/AS08G00391-RA/AS07G02432-RA/AS01G02417-RA/AS09G00774-RA/AS07G01023-RA/AS01G03033-RA	27	0.0108303249097473
49	ko00010	Glycolysis / Gluconeogenesis	42/2493	156/14627	0.00124424331477284	0.00980159019392483	0.00708323261900758	AS03G00193-RA/AS06G01305-RA/AS07G00985-RA/AS11G02242-RA/AS04G02112-RA/AS01G00904-RA/AS10G00011-RA/AS01G02476-RA/AS05G00731-RA/AS01G03749-RA/AS08G01596-RA/AS06G03895-RA/AS03G00438-RA/AS02G02884-RA/AS02G03587-RA/AS08G01680-RA/AS10G02215-RA/AS04G01486-RA/AS02G00173-RA/AS07G01597-RA/AS04G02764-RA/AS04G01320-RA/AS05G02096-RA/AS01G01475-RA/AS05G01665-RA/AS03G03023-RA/AS09G01813-RA/AS01G01346-RA/AS04G00…	42	0.0168471720818291
50	ko00941	Flavonoid biosynthesis	19/2493	56/14627	0.00163564363249317	0.0126271688428473	0.00912516973917242	AS01G03632-RA/AS05G03599-RA/AS08G03457-RA/AS10G01761-RA/AS01G01527-RA/AS06G01052-RA/AS08G02081-RA/AS02G03269-RA/AS08G00542-RA/AS02G03270-RA/AS11G02161-RA/AS07G02808-RA/AS06G01888-RA/AS06G01889-RA/AS02G03271-RA/AS01G00004-RA/AS01G03056-RA/AS05G02154-RA/AS10G01250-RA	19	0.00762133975130365
51	ko05322	Systemic lupus erythematosus	26/2493	86/14627	0.00177178740929374	0.013409998823282	0.00969089088674595	AS01G03539-RA/AS08G02828-RA/AS09G02135-RA/AS04G03328-RA/AS02G00875-RA/AS07G00027-RA/AS01G01176-RA/AS02G00596-RA/AS02G00599-RA/AS03G00491-RA/AS02G01910-RA/AS03G00483-RA/AS02G01134-RA/AS05G01245-RA/AS01G01174-RA/AS06G02859-RA/AS01G01178-RA/AS11G01277-RA/AS04G01798-RA/AS01G01297-RA/AS02G00588-RA/AS08G01622-RA/AS06G02563-RA/AS08G01621-RA/AS02G00163-RA/AS11G00969-RA	26	0.0104292017649418
52	ko00592	alpha-Linolenic acid metabolism	22/2493	69/14627	0.00183695270572589	0.0136358412386575	0.00985409852261862	AS05G01632-RA/AS10G02326-RA/AS03G02333-RA/AS03G00438-RA/AS10G02325-RA/AS05G03160-RA/AS11G01546-RA/AS05G02096-RA/AS07G03192-RA/AS05G00251-RA/AS05G01630-RA/AS05G01855-RA/AS10G02327-RA/AS03G02140-RA/AS10G00668-RA/AS06G03537-RA/AS01G01440-RA/AS07G00579-RA/AS07G03649-RA/AS07G00243-RA/AS10G01203-RA/AS10G00667-RA	22	0.00882470918572002
53	ko04924	Renin secretion	14/2493	37/14627	0.0020497451945483	0.0149283329263329	0.0107881326028858	AS10G00413-RA/AS02G01520-RA/AS04G01148-RA/AS05G00001-RA/AS07G03324-RA/AS04G03481-RA/AS02G03704-RA/AS06G00686-RA/AS06G03256-RA/AS03G02031-RA/AS04G03482-RA/AS04G01789-RA/AS07G02772-RA/AS04G00481-RA	14	0.00561572402727637
54	ko00561	Glycerolipid metabolism	35/2493	128/14627	0.00228825985388792	0.0163568204370507	0.0118204456389922	AS03G00518-RA/AS11G02242-RA/AS01G02476-RA/AS02G03562-RA/AS01G00283-RA/AS04G01320-RA/AS07G02769-RA/AS06G00223-RA/AS07G00850-RA/AS02G00753-RA/AS11G02539-RA/AS03G02737-RA/AS11G01736-RA/AS09G00024-RA/AS08G00555-RA/AS05G02069-RA/AS05G03496-RA/AS04G02344-RA/AS05G01703-RA/AS11G00382-RA/AS07G03165-RA/AS08G00240-RA/AS04G01164-RA/AS05G01320-RA/AS02G03130-RA/AS08G01324-RA/AS06G03455-RA/AS01G01395-RA/AS04G03…	35	0.0140393100681909
55	ko00904	Diterpenoid biosynthesis	18/2493	54/14627	0.00268095727354963	0.0188154455925483	0.0135971995691991	AS03G02434-RA/AS02G03209-RA/AS02G02948-RA/AS03G00755-RA/AS10G00532-RA/AS02G01497-RA/AS04G03170-RA/AS06G02612-RA/AS05G01464-RA/AS01G02678-RA/AS11G02533-RA/AS08G03187-RA/AS01G03380-RA/AS10G02536-RA/AS01G03026-RA/AS07G03536-RA/AS04G02252-RA/AS09G02465-RA	18	0.0072202166064982
56	ko00999	Biosynthesis of various plant secondary metabolites	36/2493	134/14627	0.00277109409403183	0.0189059188764231	0.0136625811351298	AS03G02899-RA/AS03G01636-RA/AS08G02989-RA/AS10G02221-RA/AS03G02254-RA/AS01G01062-RA/AS02G01728-RA/AS04G01720-RA/AS03G02984-RA/AS10G02174-RA/AS01G02335-RA/AS03G02900-RA/AS01G02662-RA/AS07G02542-RA/AS08G04010-RA/AS03G02983-RA/AS06G02037-RA/AS06G02038-RA/AS01G01128-RA/AS02G02750-RA/AS10G00303-RA/AS04G03360-RA/AS02G00412-RA/AS02G03076-RA/AS07G01136-RA/AS03G02985-RA/AS04G01786-RA/AS06G01981-RA/AS07G00…	36	0.0144404332129964
57	ko00830	Retinol metabolism	27/2493	93/14627	0.00279180667346144	0.0189059188764231	0.0136625811351298	AS03G03071-RA/AS04G02112-RA/AS08G02989-RA/AS03G00438-RA/AS02G02275-RA/AS08G00778-RA/AS05G01289-RA/AS02G00173-RA/AS01G02780-RA/AS05G02096-RA/AS03G00405-RA/AS07G01482-RA/AS03G00404-RA/AS01G01128-RA/AS11G00382-RA/AS10G02179-RA/AS01G02713-RA/AS01G01973-RA/AS11G02111-RA/AS08G02278-RA/AS07G00194-RA/AS02G03145-RA/AS07G03447-RA/AS04G02894-RA/AS02G01812-RA/AS04G00952-RA/AS10G01490-RA	27	0.0108303249097473
58	ko01003	Glycosyltransferases [BR:ko01003]	89/2493	396/14627	0.00289691631349492	0.0192794775346386	0.0139325376238866	AS11G01885-RA/AS08G00192-RA/AS08G01386-RA/AS06G01542-RA/AS11G01054-RA/AS06G01603-RA/AS08G01036-RA/AS03G01636-RA/AS08G02989-RA/AS01G03317-RA/AS07G02435-RA/AS06G01147-RA/AS10G01775-RA/AS02G03148-RA/AS09G02393-RA/AS08G02333-RA/AS02G01728-RA/AS07G00973-RA/AS04G02915-RA/AS05G03257-RA/AS07G00526-RA/AS02G03082-RA/AS04G01135-RA/AS01G03565-RA/AS05G00042-RA/AS04G02912-RA/AS01G01357-RA/AS07G02473-RA/AS11G01…	89	0.0356999598876855
59	ko00380	Tryptophan metabolism	38/2493	144/14627	0.00302252763703687	0.0197745028456988	0.0142902733954464	AS03G03071-RA/AS11G02242-RA/AS08G02989-RA/AS01G02476-RA/AS08G01490-RA/AS10G02215-RA/AS05G03210-RA/AS08G01489-RA/AS04G01320-RA/AS01G02780-RA/AS07G01482-RA/AS01G03183-RA/AS08G01488-RA/AS07G01697-RA/AS01G03081-RA/AS01G01128-RA/AS11G00382-RA/AS01G02713-RA/AS05G03190-RA/AS01G03824-RA/AS09G00207-RA/AS05G01320-RA/AS01G01973-RA/AS11G02111-RA/AS09G03059-RA/AS07G00194-RA/AS09G01800-RA/AS07G03447-RA/AS02G02…	38	0.0152426795026073
60	ko04750	Inflammatory mediator regulation of TRP channels	22/2493	72/14627	0.00333566521597398	0.021459446222766	0.0155079172321597	AS10G00413-RA/AS01G02780-RA/AS07G01482-RA/AS04G01148-RA/AS07G03324-RA/AS03G02657-RA/AS02G00976-RA/AS01G02713-RA/AS10G00037-RA/AS07G02047-RA/AS07G03444-RA/AS01G01973-RA/AS11G02111-RA/AS02G01816-RA/AS02G02932-RA/AS07G01564-RA/AS07G03447-RA/AS06G03256-RA/AS03G02031-RA/AS04G01789-RA/AS04G00481-RA/AS10G00585-RA	22	0.00882470918572002
61	ko04040	Ion channels [BR:ko04040]	27/2493	95/14627	0.00386891750144291	0.0244820025501142	0.017692202551896	AS06G02141-RA/AS01G02104-RA/AS09G00804-RA/AS06G03379-RA/AS06G03572-RA/AS10G02706-RA/AS02G00145-RA/AS01G03574-RA/AS01G03228-RA/AS06G00383-RA/AS01G03575-RA/AS02G01572-RA/AS02G03677-RA/AS02G00719-RA/AS02G02328-RA/AS10G02116-RA/AS08G01606-RA/AS10G00203-RA/AS02G00142-RA/AS09G01556-RA/AS04G02403-RA/AS11G02118-RA/AS10G00204-RA/AS02G00686-RA/AS08G02610-RA/AS08G01542-RA/AS06G02894-RA	27	0.0108303249097473
62	ko05225	Hepatocellular carcinoma	25/2493	87/14627	0.00454640671330254	0.0283050482473352	0.0204549707814121	AS03G02968-RA/AS03G00454-RA/AS11G02355-RA/AS03G02171-RA/AS09G00786-RA/AS03G02967-RA/AS06G01216-RA/AS01G00731-RA/AS01G02586-RA/AS05G02851-RA/AS10G00416-RA/AS07G01164-RA/AS03G00141-RA/AS11G02363-RA/AS11G02362-RA/AS07G01174-RA/AS08G01873-RA/AS02G01758-RA/AS01G02675-RA/AS02G03130-RA/AS06G01704-RA/AS08G00391-RA/AS07G02432-RA/AS09G00774-RA/AS01G03033-RA	25	0.0100280786201364
63	ko04918	Thyroid hormone synthesis	13/2493	36/14627	0.00469700366403153	0.0287784668939075	0.0207970922467561	AS05G03112-RA/AS06G00700-RA/AS06G03290-RA/AS07G00342-RA/AS02G02879-RA/AS07G02848-RA/AS01G02859-RA/AS02G03033-RA/AS02G03786-RA/AS07G02837-RA/AS06G03703-RA/AS02G03785-RA/AS07G00107-RA	13	0.00521460088247092
64	ko00591	Linoleic acid metabolism	19/2493	61/14627	0.00487018378960397	0.029373295981049	0.0212269523724515	AS03G03071-RA/AS10G02326-RA/AS10G02325-RA/AS01G02780-RA/AS07G01482-RA/AS10G02327-RA/AS03G02657-RA/AS01G02713-RA/AS10G00037-RA/AS07G03444-RA/AS01G01973-RA/AS03G02140-RA/AS11G02111-RA/AS02G02932-RA/AS07G01564-RA/AS07G03447-RA/AS07G03649-RA/AS07G00243-RA/AS10G00585-RA	19	0.00762133975130365
65	ko04921	Oxytocin signaling pathway	35/2493	134/14627	0.00513312602084802	0.0304828714468821	0.0220287999275259	AS05G02911-RA/AS03G00923-RA/AS06G02590-RA/AS10G00413-RA/AS08G01507-RA/AS02G01520-RA/AS03G02471-RA/AS04G01148-RA/AS05G00001-RA/AS02G00704-RA/AS07G03324-RA/AS04G03481-RA/AS02G03704-RA/AS02G00976-RA/AS04G00977-RA/AS08G01873-RA/AS07G02047-RA/AS04G00483-RA/AS04G02773-RA/AS02G01816-RA/AS06G00686-RA/AS09G03007-RA/AS02G02759-RA/AS06G03256-RA/AS03G02031-RA/AS07G02432-RA/AS04G03482-RA/AS10G02102-RA/AS04G01…	35	0.0140393100681909
66	ko04090	CD molecules [BR:ko04090]	16/2493	49/14627	0.00567417253241403	0.0331853120835124	0.0239817499376351	AS03G03038-RA/AS04G02857-RA/AS08G02302-RA/AS02G01323-RA/AS09G02768-RA/AS02G03234-RA/AS09G00161-RA/AS06G02731-RA/AS08G02283-RA/AS03G00527-RA/AS11G02178-RA/AS11G02515-RA/AS02G00607-RA/AS07G02596-RA/AS11G02182-RA/AS01G02387-RA	16	0.00641797031688728
67	ko00071	Fatty acid degradation	20/2493	67/14627	0.00666425497204151	0.0383940659583287	0.0277459162229537	AS03G02877-RA/AS11G02242-RA/AS04G02112-RA/AS01G02476-RA/AS03G02333-RA/AS07G01828-RA/AS03G00438-RA/AS02G00173-RA/AS04G01320-RA/AS11G01546-RA/AS05G02096-RA/AS05G01855-RA/AS05G01267-RA/AS11G00382-RA/AS05G01320-RA/AS06G03537-RA/AS01G01440-RA/AS11G02538-RA/AS01G01069-RA/AS09G00454-RA	20	0.00802246289610911
68	ko04720	Long-term potentiation	19/2493	63/14627	0.00715419663088103	0.0406105867576482	0.0293477106375151	AS10G00413-RA/AS02G01520-RA/AS04G01148-RA/AS07G03324-RA/AS04G03481-RA/AS02G03704-RA/AS02G00976-RA/AS08G01873-RA/AS07G02047-RA/AS04G01006-RA/AS02G01816-RA/AS06G00686-RA/AS06G03256-RA/AS03G02031-RA/AS07G02432-RA/AS04G03482-RA/AS04G01789-RA/AS07G02772-RA/AS04G00481-RA	19	0.00762133975130365
69	ko02026	Biofilm formation - Escherichia coli	7/2493	15/14627	0.00746297856302256	0.0417494163090827	0.030170698996201	AS06G03877-RA/AS07G02652-RA/AS08G01036-RA/AS10G00223-RA/AS08G02713-RA/AS02G01769-RA/AS06G01713-RA	7	0.00280786201363819
70	ko00625	Chloroalkane and chloroalkene degradation	10/2493	26/14627	0.00766555895590208	0.0422700822425458	0.0305469642603617	AS11G02242-RA/AS04G02112-RA/AS01G02476-RA/AS03G00438-RA/AS02G00173-RA/AS04G01320-RA/AS05G02096-RA/AS11G00382-RA/AS05G01320-RA/AS09G00454-RA	10	0.00401123144805455
71	ko00140	Steroid hormone biosynthesis	30/2493	114/14627	0.00813427193138127	0.0442229431762419	0.0319582218208456	AS03G03071-RA/AS08G02989-RA/AS11G00944-RA/AS01G02780-RA/AS07G01482-RA/AS01G03081-RA/AS01G01128-RA/AS02G00275-RA/AS01G01535-RA/AS03G02657-RA/AS01G02713-RA/AS10G00037-RA/AS01G03824-RA/AS09G00207-RA/AS07G03012-RA/AS01G01973-RA/AS11G02111-RA/AS08G00713-RA/AS07G00194-RA/AS02G02932-RA/AS07G01564-RA/AS07G03447-RA/AS04G01427-RA/AS09G00870-RA/AS01G03077-RA/AS05G00578-RA/AS11G02439-RA/AS04G00952-RA/AS11G01…	30	0.0120336943441637
72	ko04014	Ras signaling pathway	29/2493	110/14627	0.00892207347979555	0.0476028405724545	0.0344007438006557	AS11G01038-RA/AS02G00243-RA/AS05G03414-RA/AS08G02087-RA/AS10G00180-RA/AS10G00413-RA/AS05G02724-RA/AS04G01148-RA/AS07G03324-RA/AS02G00236-RA/AS06G01348-RA/AS02G00206-RA/AS11G01051-RA/AS04G00938-RA/AS04G00443-RA/AS08G01873-RA/AS04G03724-RA/AS07G02418-RA/AS02G00203-RA/AS07G02394-RA/AS02G00719-RA/AS11G00795-RA/AS02G00237-RA/AS06G03256-RA/AS03G02031-RA/AS07G02432-RA/AS04G01789-RA/AS03G01023-RA/AS04G00…	29	0.0116325711993582
73	ko04658	Th1 and Th2 cell differentiation	8/2493	19/14627	0.00900260974556781	0.0476028405724545	0.0344007438006557	AS02G01520-RA/AS04G03481-RA/AS02G03704-RA/AS08G01873-RA/AS06G00686-RA/AS07G02432-RA/AS04G03482-RA/AS07G02772-RA	8	0.00320898515844364
74	ko04020	Calcium signaling pathway	24/2493	87/14627	0.00924531918302196	0.048225583846574	0.0348507764367115	AS06G02141-RA/AS05G02911-RA/AS09G01068-RA/AS06G02995-RA/AS10G00413-RA/AS02G01520-RA/AS04G01148-RA/AS01G02510-RA/AS07G03324-RA/AS04G03481-RA/AS02G03704-RA/AS11G01534-RA/AS10G01361-RA/AS02G01816-RA/AS06G00686-RA/AS06G03256-RA/AS04G00999-RA/AS03G02031-RA/AS05G00062-RA/AS04G03482-RA/AS11G02699-RA/AS04G01789-RA/AS07G02772-RA/AS04G00481-RA	24	0.00962695547533093
75	ko00330	Arginine and proline metabolism	20/2493	69/14627	0.00945681812165689	0.0484353621010656	0.0350023751207592	AS06G00391-RA/AS11G02242-RA/AS01G02476-RA/AS07G01291-RA/AS09G01435-RA/AS09G03052-RA/AS09G00781-RA/AS08G00490-RA/AS06G03497-RA/AS04G01320-RA/AS07G01900-RA/AS04G01016-RA/AS11G00382-RA/AS01G02494-RA/AS05G01320-RA/AS09G01800-RA/AS03G02203-RA/AS09G01796-RA/AS09G00454-RA/AS05G01017-RA	20	0.00802246289610911
76	ko00270	Cysteine and methionine metabolism	37/2493	149/14627	0.00973116996514912	0.0484353621010656	0.0350023751207592	AS06G00391-RA/AS02G01104-RA/AS10G02221-RA/AS07G01291-RA/AS09G01435-RA/AS09G03052-RA/AS03G02884-RA/AS08G00490-RA/AS06G03497-RA/AS10G02174-RA/AS01G00075-RA/AS04G00480-RA/AS01G02662-RA/AS06G03555-RA/AS07G02542-RA/AS05G02041-RA/AS01G02920-RA/AS07G01362-RA/AS05G02127-RA/AS02G02750-RA/AS06G00328-RA/AS01G02494-RA/AS08G00046-RA/AS03G00717-RA/AS07G03086-RA/AS01G02297-RA/AS03G02203-RA/AS02G03823-RA/AS06G00…	37	0.0148415563578018
77	ko00710	Carbon fixation in photosynthetic organisms	25/2493	92/14627	0.00978489016949328	0.0484353621010656	0.0350023751207592	AS07G01430-RA/AS01G00904-RA/AS07G01061-RA/AS09G03052-RA/AS06G03895-RA/AS07G00710-RA/AS04G02764-RA/AS06G03497-RA/AS04G00480-RA/AS09G01813-RA/AS11G01803-RA/AS06G03514-RA/AS01G02494-RA/AS02G00329-RA/AS05G00137-RA/AS07G01366-RA/AS06G01642-RA/AS10G00509-RA/AS09G01312-RA/AS10G01081-RA/AS03G00453-RA/AS03G03018-RA/AS05G00139-RA/AS04G01440-RA/AS09G01749-RA	25	0.0100280786201364
78	ko04913	Ovarian steroidogenesis	28/2493	106/14627	0.00978745659037077	0.0484353621010656	0.0350023751207592	AS08G02989-RA/AS11G00944-RA/AS01G02780-RA/AS07G01482-RA/AS01G03081-RA/AS01G01128-RA/AS01G01535-RA/AS03G02657-RA/AS01G02713-RA/AS10G00037-RA/AS01G03824-RA/AS09G00207-RA/AS07G03444-RA/AS07G03012-RA/AS01G01973-RA/AS11G02111-RA/AS08G00713-RA/AS07G00194-RA/AS02G02932-RA/AS07G01564-RA/AS07G03447-RA/AS09G00870-RA/AS01G03077-RA/AS05G00578-RA/AS11G02439-RA/AS04G00952-RA/AS11G01296-RA/AS10G00585-RA	28	0.0112314480545527

## Sheet: DEGs-B7vsB5 （GO）
No.	Category	ID	term	Genes	adj_pvalue
1	BP	GO:0010200	response to chitin	AS06G03805-RA,AS04G03648-RA,AS06G03735-RA,AS06G03797-RA,AS08G00835-RA,AS01G02144-RA,AS10G01807-RA,AS05G00467-RA,AS03G02717-RA,AS05G00752-RA,AS01G03176-RA,AS02G03252-RA,AS08G00175-RA,AS01G01182-RA,AS03G00539-RA,AS05G02115-RA,AS01G00309-RA,AS06G01118-RA,AS05G00754-RA,AS01G01230-RA,AS02G00114-RA,AS08G01864-RA,AS07G03050-RA,AS11G02126-RA,AS11G00348-RA,AS02G01563-RA,AS11G02192-RA,AS01G03242-RA,AS09G00…	8.01455224190128e-27
2	BP	GO:0010243	response to organonitrogen compound	AS06G03805-RA,AS05G02321-RA,AS04G03648-RA,AS06G03735-RA,AS06G01386-RA,AS06G03797-RA,AS08G00835-RA,AS07G02837-RA,AS01G02144-RA,AS10G01807-RA,AS05G00467-RA,AS03G02717-RA,AS05G03296-RA,AS05G00752-RA,AS01G03176-RA,AS01G03349-RA,AS02G03252-RA,AS08G00175-RA,AS01G01182-RA,AS03G00539-RA,AS05G02115-RA,AS01G00309-RA,AS06G01118-RA,AS08G02333-RA,AS05G00754-RA,AS01G01230-RA,AS09G02568-RA,AS02G00114-RA,AS08G01…	5.51381857238466e-18
3	BP	GO:1901698	response to nitrogen compound	AS11G02611-RA,AS06G03805-RA,AS05G02321-RA,AS04G03648-RA,AS06G03735-RA,AS06G01386-RA,AS06G03797-RA,AS08G00835-RA,AS07G03455-RA,AS02G01503-RA,AS06G03068-RA,AS07G02837-RA,AS08G02940-RA,AS01G02144-RA,AS10G01807-RA,AS05G00467-RA,AS03G02717-RA,AS05G03296-RA,AS05G00752-RA,AS01G03176-RA,AS01G03349-RA,AS02G03252-RA,AS08G00175-RA,AS01G01182-RA,AS03G00539-RA,AS05G01080-RA,AS05G02115-RA,AS01G00309-RA,AS06G02…	1.54677726573592e-15
4	CC	GO:0009505	plant-type cell wall	AS10G01671-RA,AS08G01962-RA,AS05G01265-RA,AS03G00055-RA,AS09G00319-RA,AS04G00986-RA,AS02G03347-RA,AS10G01519-RA,AS10G00849-RA,AS03G02533-RA,AS01G00044-RA,AS04G00009-RA,AS07G00514-RA,AS05G03528-RA,AS07G03236-RA,AS06G01907-RA,AS05G03529-RA,AS03G00289-RA,AS04G01325-RA,AS05G01780-RA,AS07G03229-RA,AS06G01120-RA,AS02G00147-RA,AS05G01170-RA,AS03G02305-RA,AS07G02877-RA,AS05G01080-RA,AS02G03344-RA,AS05G00…	2.22145341786153e-13
5	BP	GO:0019748	secondary metabolic process	AS03G00113-RA,AS01G00665-RA,AS01G03077-RA,AS06G01386-RA,AS06G00884-RA,AS04G03120-RA,AS08G00466-RA,AS06G01981-RA,AS06G00357-RA,AS07G02082-RA,AS08G02080-RA,AS01G03360-RA,AS09G00215-RA,AS08G00772-RA,AS05G03296-RA,AS07G03229-RA,AS02G02948-RA,AS05G01648-RA,AS05G00522-RA,AS10G02023-RA,AS02G03252-RA,AS06G00422-RA,AS09G00870-RA,AS05G00657-RA,AS01G00297-RA,AS02G01316-RA,AS05G00277-RA,AS02G01011-RA,AS01G01…	5.69996633400985e-11
6	BP	GO:0009733	response to auxin	AS06G02943-RA,AS07G03019-RA,AS09G03024-RA,AS01G00665-RA,AS05G02457-RA,AS02G03285-RA,AS07G03455-RA,AS09G01629-RA,AS04G03120-RA,AS10G00144-RA,AS01G01430-RA,AS04G02779-RA,AS09G03010-RA,AS11G01176-RA,AS05G01661-RA,AS01G03349-RA,AS05G01372-RA,AS05G03671-RA,AS03G02739-RA,AS05G01080-RA,AS03G00266-RA,AS04G00842-RA,AS11G02515-RA,AS01G00309-RA,AS04G00327-RA,AS06G01118-RA,AS05G02940-RA,AS03G01842-RA,AS06G00…	9.73816219587023e-11
7	BP	GO:0009414	response to water deprivation	AS08G02492-RA,AS05G02720-RA,AS07G01556-RA,AS03G02817-RA,AS05G03442-RA,AS05G02217-RA,AS02G01168-RA,AS11G01257-RA,AS02G03551-RA,AS06G03735-RA,AS04G01674-RA,AS01G00044-RA,AS04G02617-RA,AS10G00614-RA,AS08G00466-RA,AS08G02566-RA,AS01G02144-RA,AS10G01807-RA,AS01G02730-RA,AS08G02567-RA,AS04G01672-RA,AS09G00215-RA,AS08G01893-RA,AS07G03345-RA,AS09G02314-RA,AS03G00559-RA,AS07G02771-RA,AS02G03252-RA,AS06G00…	1.36190482867379e-10
8	BP	GO:0009415	response to water	AS08G02492-RA,AS05G02720-RA,AS07G01556-RA,AS03G02817-RA,AS05G03442-RA,AS05G02217-RA,AS02G01168-RA,AS11G01257-RA,AS02G03551-RA,AS06G03735-RA,AS04G01674-RA,AS01G00044-RA,AS04G02617-RA,AS10G00614-RA,AS08G00466-RA,AS08G02566-RA,AS01G02144-RA,AS10G01807-RA,AS01G02730-RA,AS08G02567-RA,AS04G01672-RA,AS09G00215-RA,AS08G01893-RA,AS07G03345-RA,AS09G02314-RA,AS03G00559-RA,AS07G02771-RA,AS02G03252-RA,AS06G00…	2.16538841310574e-10
9	BP	GO:0071365	cellular response to auxin stimulus	AS01G00665-RA,AS05G02457-RA,AS02G03285-RA,AS07G03455-RA,AS04G03120-RA,AS04G02779-RA,AS05G01661-RA,AS05G01372-RA,AS05G03671-RA,AS03G00266-RA,AS11G02515-RA,AS01G00309-RA,AS06G01118-RA,AS02G03234-RA,AS09G00475-RA,AS04G00298-RA,AS06G01355-RA,AS10G00143-RA,AS06G02877-RA,AS02G02476-RA,AS08G02210-RA,AS05G03527-RA,AS04G00746-RA,AS10G00451-RA,AS08G01686-RA,AS02G01214-RA,AS07G03192-RA,AS03G02018-RA,AS03G02…	1.47208855760605e-09
10	BP	GO:0071554	cell wall organization or biogenesis	AS11G01454-RA,AS06G02856-RA,AS01G01251-RA,AS06G02320-RA,AS08G03558-RA,AS05G01492-RA,AS07G00877-RA,AS07G02689-RA,AS03G01361-RA,AS09G00319-RA,AS10G01519-RA,AS03G00064-RA,AS11G01636-RA,AS06G00015-RA,AS01G03077-RA,AS04G02428-RA,AS10G00849-RA,AS01G03145-RA,AS01G00044-RA,AS05G02843-RA,AS01G03395-RA,AS08G01535-RA,AS01G02730-RA,AS07G03229-RA,AS05G02324-RA,AS06G01120-RA,AS02G00147-RA,AS05G01661-RA,AS01G03…	1.36127491889388e-08
11	BP	GO:0009734	auxin-activated signaling pathway	AS01G00665-RA,AS05G02457-RA,AS02G03285-RA,AS07G03455-RA,AS04G03120-RA,AS04G02779-RA,AS05G03671-RA,AS03G00266-RA,AS11G02515-RA,AS01G00309-RA,AS06G01118-RA,AS02G03234-RA,AS09G00475-RA,AS04G00298-RA,AS06G01355-RA,AS10G00143-RA,AS06G02877-RA,AS02G02476-RA,AS08G02210-RA,AS05G03527-RA,AS04G00746-RA,AS10G00451-RA,AS02G01214-RA,AS07G03192-RA,AS03G02018-RA,AS03G02705-RA,AS07G01458-RA,AS01G02059-RA,AS05G03…	7.46340267086837e-08
12	BP	GO:0009620	response to fungus	AS11G01454-RA,AS05G00803-RA,AS05G01265-RA,AS02G03347-RA,AS06G03805-RA,AS02G01103-RA,AS05G03528-RA,AS06G03068-RA,AS08G02566-RA,AS01G01520-RA,AS04G02730-RA,AS05G03529-RA,AS08G02080-RA,AS04G01325-RA,AS08G02567-RA,AS01G03360-RA,AS06G01795-RA,AS05G01780-RA,AS08G01893-RA,AS07G03649-RA,AS05G01661-RA,AS01G03349-RA,AS05G01170-RA,AS02G03252-RA,AS05G00137-RA,AS09G01066-RA,AS03G00372-RA,AS09G00323-RA,AS11G02…	1.26128691271032e-07
13	BP	GO:0009751	response to salicylic acid	AS11G02611-RA,AS05G02922-RA,AS06G01731-RA,AS07G03455-RA,AS09G01737-RA,AS07G02698-RA,AS06G00334-RA,AS05G01648-RA,AS09G01066-RA,AS07G03294-RA,AS01G00309-RA,AS06G01118-RA,AS01G01546-RA,AS03G03003-RA,AS08G02333-RA,AS09G02568-RA,AS07G03085-RA,AS02G00114-RA,AS07G03532-RA,AS05G01785-RA,AS07G03050-RA,AS02G03383-RA,AS04G00298-RA,AS02G02681-RA,AS01G03561-RA,AS01G03242-RA,AS08G00194-RA,AS03G01102-RA,AS10G00…	2.3580880670427e-07
14	BP	GO:0044550	secondary metabolite biosynthetic process	AS03G00113-RA,AS01G00665-RA,AS01G03077-RA,AS06G01386-RA,AS06G00884-RA,AS04G03120-RA,AS06G01981-RA,AS07G02082-RA,AS09G00215-RA,AS05G03296-RA,AS07G03229-RA,AS02G02948-RA,AS05G01648-RA,AS02G03252-RA,AS09G00870-RA,AS05G00657-RA,AS01G00297-RA,AS02G01011-RA,AS01G01230-RA,AS03G02657-RA,AS05G03599-RA,AS07G00843-RA,AS04G01453-RA,AS06G02877-RA,AS05G02643-RA,AS09G00734-RA,AS07G01564-RA,AS08G01686-RA,AS05G01…	4.62152977845829e-07
15	BP	GO:0050832	defense response to fungus	AS11G01454-RA,AS05G00803-RA,AS02G03347-RA,AS06G03805-RA,AS02G01103-RA,AS05G03528-RA,AS06G03068-RA,AS01G01520-RA,AS04G02730-RA,AS05G03529-RA,AS08G02080-RA,AS04G01325-RA,AS01G03360-RA,AS06G01795-RA,AS08G01893-RA,AS05G01661-RA,AS05G01170-RA,AS02G03252-RA,AS05G00137-RA,AS09G01066-RA,AS03G00372-RA,AS09G00323-RA,AS05G03633-RA,AS01G00309-RA,AS02G03344-RA,AS06G03845-RA,AS06G01118-RA,AS05G00410-RA,AS03G00…	9.04084594403355e-07
16	BP	GO:0071669	plant-type cell wall organization or biogenesis	AS11G01454-RA,AS01G01251-RA,AS05G01492-RA,AS07G00877-RA,AS07G02689-RA,AS03G01361-RA,AS09G00319-RA,AS10G01519-RA,AS06G00015-RA,AS04G02428-RA,AS01G03145-RA,AS01G00044-RA,AS05G02843-RA,AS01G02730-RA,AS05G02324-RA,AS06G01120-RA,AS02G00147-RA,AS05G01661-RA,AS01G03423-RA,AS03G02305-RA,AS08G02903-RA,AS09G01066-RA,AS10G02677-RA,AS05G00277-RA,AS02G01011-RA,AS09G01824-RA,AS05G01264-RA,AS05G03307-RA,AS04G02…	1.10882749558708e-06
17	BP	GO:0009611	response to wounding	AS04G00212-RA,AS11G02662-RA,AS06G02710-RA,AS06G02726-RA,AS02G02300-RA,AS04G02110-RA,AS07G03455-RA,AS11G02093-RA,AS08G01893-RA,AS05G01630-RA,AS07G03649-RA,AS05G01648-RA,AS05G00522-RA,AS01G01182-RA,AS03G00372-RA,AS08G01921-RA,AS04G03343-RA,AS11G02236-RA,AS06G02239-RA,AS05G01963-RA,AS03G03003-RA,AS03G00911-RA,AS01G01230-RA,AS09G02568-RA,AS09G02544-RA,AS07G03050-RA,AS02G01186-RA,AS04G00298-RA,AS02G02…	1.36431008365464e-06
18	MF	GO:0016722	oxidoreductase activity, acting on metal ions	AS03G00113-RA,AS07G03431-RA,AS08G00008-RA,AS06G00548-RA,AS06G03130-RA,AS02G01011-RA,AS07G02486-RA,AS11G02368-RA,AS07G00843-RA,AS01G00523-RA,AS08G00706-RA,AS01G01384-RA,AS08G02145-RA,AS11G00920-RA,AS11G02004-RA,AS08G01875-RA,AS11G02480-RA,AS01G00928-RA,AS03G00337-RA,AS08G00174-RA,AS07G02428-RA,AS06G01760-RA,AS07G00502-RA,AS07G02429-RA	2.97004159103648e-06
19	BP	GO:0010928	regulation of auxin mediated signaling pathway	AS05G02457-RA,AS02G03285-RA,AS03G00266-RA,AS11G02515-RA,AS01G00309-RA,AS06G01118-RA,AS02G03234-RA,AS06G01355-RA,AS08G02210-RA,AS10G00451-RA,AS03G02705-RA,AS07G01458-RA,AS01G02059-RA,AS08G01990-RA,AS06G02964-RA,AS11G00720-RA,AS05G02230-RA,AS06G02731-RA,AS01G03108-RA,AS02G00659-RA,AS04G03729-RA,AS01G00312-RA,AS02G01323-RA,AS08G01227-RA,AS10G02336-RA,AS09G01808-RA,AS02G01400-RA,AS03G01743-RA,AS05G02…	9.17126685667102e-06
20	MF	GO:0016705	oxidoreductase activity, acting on paired donors, with incorporation or reduction of molecular oxygen	AS01G03077-RA,AS08G00041-RA,AS11G01811-RA,AS06G00884-RA,AS01G02678-RA,AS03G00485-RA,AS03G00486-RA,AS02G01893-RA,AS09G00215-RA,AS02G03209-RA,AS02G02948-RA,AS11G01807-RA,AS08G01857-RA,AS09G00870-RA,AS02G00133-RA,AS01G00297-RA,AS11G02648-RA,AS07G03224-RA,AS05G03643-RA,AS03G00488-RA,AS03G02657-RA,AS05G03644-RA,AS02G02722-RA,AS09G00757-RA,AS05G03645-RA,AS05G03599-RA,AS02G01907-RA,AS03G00439-RA,AS02G03…	1.42912193322367e-05
21	BP	GO:0009834	plant-type secondary cell wall biogenesis	AS11G01454-RA,AS01G01251-RA,AS05G01492-RA,AS07G02689-RA,AS04G02428-RA,AS05G01661-RA,AS01G03423-RA,AS03G02305-RA,AS08G02903-RA,AS09G01066-RA,AS02G01011-RA,AS05G01264-RA,AS05G03241-RA,AS07G00843-RA,AS03G00690-RA,AS04G00551-RA,AS01G03747-RA,AS07G00220-RA,AS01G01384-RA,AS05G02391-RA,AS06G02964-RA,AS02G01948-RA,AS01G03108-RA,AS02G00175-RA,AS05G00042-RA,AS01G01249-RA,AS05G02756-RA,AS03G02428-RA,AS04G00…	3.70706510972909e-05
22	BP	GO:0046677	response to antibiotic	AS11G02611-RA,AS05G02922-RA,AS06G01386-RA,AS10G01803-RA,AS07G03455-RA,AS09G01737-RA,AS06G01981-RA,AS07G02698-RA,AS06G00334-RA,AS08G01893-RA,AS07G03649-RA,AS05G03296-RA,AS05G01648-RA,AS01G03349-RA,AS09G01066-RA,AS03G02938-RA,AS01G00309-RA,AS06G01118-RA,AS01G01546-RA,AS03G03003-RA,AS08G02333-RA,AS09G02568-RA,AS07G03085-RA,AS02G00114-RA,AS07G03532-RA,AS05G01785-RA,AS07G03050-RA,AS02G01186-RA,AS02G02…	4.54644971509919e-05
23	BP	GO:0042446	hormone biosynthetic process	AS11G02611-RA,AS09G03024-RA,AS02G00275-RA,AS01G03077-RA,AS04G02110-RA,AS04G02560-RA,AS10G02659-RA,AS09G01737-RA,AS08G02566-RA,AS05G02127-RA,AS02G01929-RA,AS08G02567-RA,AS02G02948-RA,AS03G00430-RA,AS05G02041-RA,AS10G02023-RA,AS01G00297-RA,AS11G02648-RA,AS02G01316-RA,AS10G01495-RA,AS06G01796-RA,AS03G00205-RA,AS02G03651-RA,AS08G00046-RA,AS07G00579-RA,AS02G03823-RA,AS07G03192-RA,AS08G02779-RA,AS09G03…	8.40853855405724e-05
24	BP	GO:0070542	response to fatty acid	AS04G00212-RA,AS05G02922-RA,AS06G02726-RA,AS08G00835-RA,AS07G03455-RA,AS03G00197-RA,AS05G00467-RA,AS03G02717-RA,AS07G03649-RA,AS05G01648-RA,AS03G00372-RA,AS04G03343-RA,AS01G00309-RA,AS06G01118-RA,AS10G01495-RA,AS03G03003-RA,AS03G00911-RA,AS09G02568-RA,AS07G03532-RA,AS05G01785-RA,AS03G02942-RA,AS09G02997-RA,AS08G01434-RA,AS09G02544-RA,AS07G03050-RA,AS02G03383-RA,AS04G00298-RA,AS10G00143-RA,AS10G00…	8.77915806782035e-05
25	BP	GO:0010315	auxin efflux	AS05G02457-RA,AS02G03285-RA,AS11G02515-RA,AS02G03234-RA,AS06G01355-RA,AS08G02210-RA,AS10G00451-RA,AS03G02705-RA,AS07G01458-RA,AS01G02059-RA,AS06G02964-RA,AS05G02230-RA,AS06G02731-RA,AS01G03108-RA,AS02G01323-RA,AS10G02336-RA,AS02G01400-RA,AS05G02756-RA,AS06G01670-RA	0.000103394438513241
26	BP	GO:0042546	cell wall biogenesis	AS11G01454-RA,AS06G02856-RA,AS01G01251-RA,AS05G01492-RA,AS07G00877-RA,AS07G02689-RA,AS04G02428-RA,AS05G02843-RA,AS01G03395-RA,AS01G02730-RA,AS05G01661-RA,AS01G03423-RA,AS01G02343-RA,AS03G02305-RA,AS08G02903-RA,AS09G01066-RA,AS09G01881-RA,AS02G01011-RA,AS05G01264-RA,AS05G03241-RA,AS11G01956-RA,AS07G00843-RA,AS03G00690-RA,AS04G00551-RA,AS01G03747-RA,AS07G00220-RA,AS07G00973-RA,AS01G01384-RA,AS05G02…	0.00011424577974674
27	BP	GO:0071229	cellular response to acid chemical	AS04G00212-RA,AS05G03707-RA,AS05G00854-RA,AS09G00635-RA,AS11G01257-RA,AS08G00835-RA,AS07G03455-RA,AS06G00897-RA,AS03G00197-RA,AS08G02940-RA,AS05G00467-RA,AS08G01893-RA,AS07G03345-RA,AS02G02948-RA,AS03G00372-RA,AS04G03343-RA,AS01G00297-RA,AS01G01546-RA,AS10G01495-RA,AS03G03003-RA,AS03G00911-RA,AS01G01230-RA,AS05G01785-RA,AS09G02997-RA,AS09G02386-RA,AS02G01186-RA,AS03G02945-RA,AS05G03751-RA,AS04G00…	0.00011424577974674
28	BP	GO:0009630	gravitropism	AS06G01986-RA,AS05G02457-RA,AS11G02515-RA,AS01G00512-RA,AS04G00747-RA,AS01G01861-RA,AS06G00881-RA,AS02G03234-RA,AS06G01355-RA,AS10G00143-RA,AS02G02476-RA,AS10G00451-RA,AS08G00616-RA,AS06G01070-RA,AS07G01198-RA,AS01G01402-RA,AS01G01119-RA,AS03G02018-RA,AS03G02705-RA,AS07G01458-RA,AS01G03141-RA,AS07G01953-RA,AS11G00720-RA,AS07G01546-RA,AS05G02230-RA,AS06G02731-RA,AS01G00312-RA,AS08G03535-RA,AS06G00…	0.000116261455905619
29	BP	GO:0009753	response to jasmonic acid	AS04G00212-RA,AS05G02922-RA,AS06G02726-RA,AS08G00835-RA,AS07G03455-RA,AS03G00197-RA,AS05G00467-RA,AS03G02717-RA,AS07G03649-RA,AS05G01648-RA,AS03G00372-RA,AS04G03343-RA,AS01G00309-RA,AS06G01118-RA,AS03G03003-RA,AS03G00911-RA,AS09G02568-RA,AS07G03532-RA,AS05G01785-RA,AS03G02942-RA,AS09G02997-RA,AS08G01434-RA,AS09G02544-RA,AS07G03050-RA,AS02G03383-RA,AS04G00298-RA,AS10G00143-RA,AS10G00428-RA,AS03G01…	0.000116261455905619
30	MF	GO:0045485	omega-6 fatty acid desaturase activity	AS03G00485-RA,AS03G00486-RA,AS11G01807-RA,AS02G00133-RA,AS07G03224-RA,AS05G03643-RA,AS03G00488-RA,AS05G03644-RA,AS09G00757-RA,AS05G03645-RA,AS03G00439-RA,AS11G01812-RA,AS03G00440-RA,AS06G00509-RA,AS03G00487-RA,AS01G01960-RA,AS05G03642-RA	0.000134838411256985
31	BP	GO:0009723	response to ethylene	AS02G00564-RA,AS04G02560-RA,AS05G02457-RA,AS08G00835-RA,AS01G01520-RA,AS05G00467-RA,AS08G01893-RA,AS02G03455-RA,AS04G01115-RA,AS05G01080-RA,AS07G02566-RA,AS01G00309-RA,AS06G01118-RA,AS10G01495-RA,AS07G03532-RA,AS05G01785-RA,AS06G00881-RA,AS09G02544-RA,AS02G01186-RA,AS02G02916-RA,AS09G02842-RA,AS10G00428-RA,AS07G02632-RA,AS09G02337-RA,AS11G01588-RA,AS02G02444-RA,AS08G00050-RA,AS08G01807-RA,AS06G00…	0.000137235199145288
32	BP	GO:0042445	hormone metabolic process	AS11G02611-RA,AS05G03772-RA,AS06G00605-RA,AS04G02523-RA,AS09G03024-RA,AS04G03078-RA,AS02G00275-RA,AS01G03077-RA,AS04G02110-RA,AS09G01022-RA,AS04G02560-RA,AS10G02659-RA,AS01G02678-RA,AS09G01737-RA,AS08G02566-RA,AS05G02127-RA,AS02G01929-RA,AS08G02567-RA,AS02G03209-RA,AS02G02948-RA,AS03G00430-RA,AS05G02041-RA,AS10G02023-RA,AS01G02028-RA,AS01G00297-RA,AS11G02648-RA,AS02G01316-RA,AS10G01495-RA,AS06G01…	0.000157840282535822
33	BP	GO:0009698	phenylpropanoid metabolic process	AS03G00113-RA,AS06G01386-RA,AS08G00466-RA,AS06G01981-RA,AS05G03296-RA,AS07G03229-RA,AS05G01648-RA,AS10G02023-RA,AS06G00422-RA,AS05G00657-RA,AS02G01316-RA,AS05G00277-RA,AS02G01011-RA,AS07G03546-RA,AS07G00843-RA,AS09G00734-RA,AS08G01686-RA,AS05G01212-RA,AS01G01384-RA,AS05G01525-RA,AS01G01036-RA,AS04G00078-RA,AS04G00249-RA,AS04G00573-RA,AS05G00266-RA,AS11G01206-RA,AS05G02486-RA,AS07G02808-RA,AS10G01…	0.000218581021858827
34	BP	GO:0048878	chemical homeostasis	AS09G01370-RA,AS07G01556-RA,AS06G00605-RA,AS04G02523-RA,AS07G03019-RA,AS01G00665-RA,AS05G02457-RA,AS04G03120-RA,AS04G00055-RA,AS02G01503-RA,AS05G00447-RA,AS04G02501-RA,AS09G00215-RA,AS07G03020-RA,AS01G01430-RA,AS11G00422-RA,AS10G02023-RA,AS04G00842-RA,AS06G00643-RA,AS06G02324-RA,AS02G01316-RA,AS06G00273-RA,AS11G02185-RA,AS05G01868-RA,AS08G02095-RA,AS08G03804-RA,AS07G00701-RA,AS09G00475-RA,AS07G00…	0.000218581021858827
35	BP	GO:0009409	response to cold	AS03G02817-RA,AS05G02217-RA,AS03G01361-RA,AS09G02537-RA,AS08G00041-RA,AS07G00880-RA,AS01G03145-RA,AS01G00044-RA,AS07G03455-RA,AS08G00466-RA,AS04G00843-RA,AS04G01672-RA,AS08G01893-RA,AS08G01748-RA,AS04G02792-RA,AS05G02324-RA,AS09G02314-RA,AS01G03176-RA,AS03G00559-RA,AS02G03252-RA,AS07G00004-RA,AS01G01182-RA,AS08G01857-RA,AS10G00194-RA,AS02G00545-RA,AS01G01230-RA,AS07G03117-RA,AS07G03050-RA,AS02G01…	0.000237275725695225
36	BP	GO:0009606	tropism	AS06G01986-RA,AS05G02457-RA,AS01G01620-RA,AS11G02515-RA,AS01G00512-RA,AS04G00747-RA,AS01G01861-RA,AS04G02674-RA,AS06G00881-RA,AS02G03234-RA,AS06G01355-RA,AS10G00143-RA,AS02G02476-RA,AS10G00451-RA,AS08G00616-RA,AS06G01070-RA,AS07G01198-RA,AS01G01402-RA,AS01G01119-RA,AS03G02018-RA,AS03G02705-RA,AS07G01458-RA,AS01G03141-RA,AS07G01953-RA,AS11G00720-RA,AS07G01546-RA,AS05G02230-RA,AS10G02794-RA,AS06G02…	0.000285054150920248
37	BP	GO:0009629	response to gravity	AS06G01986-RA,AS05G02457-RA,AS11G02515-RA,AS01G00512-RA,AS04G00747-RA,AS01G01861-RA,AS06G00881-RA,AS02G03234-RA,AS06G01355-RA,AS10G00143-RA,AS02G02476-RA,AS10G00451-RA,AS08G00616-RA,AS06G01070-RA,AS07G01198-RA,AS01G01402-RA,AS01G01119-RA,AS03G02018-RA,AS03G02705-RA,AS07G01458-RA,AS01G03141-RA,AS07G01953-RA,AS11G00720-RA,AS07G01546-RA,AS05G02230-RA,AS06G02731-RA,AS01G00312-RA,AS08G03535-RA,AS06G00…	0.00029965789893625
38	MF	GO:0003777	microtubule motor activity	AS05G00624-RA,AS04G02502-RA,AS02G02423-RA,AS07G01716-RA,AS01G00050-RA,AS05G00566-RA,AS03G00064-RA,AS09G00728-RA,AS08G03044-RA,AS01G00133-RA,AS05G01162-RA,AS05G00158-RA,AS04G01543-RA,AS01G00532-RA,AS06G00349-RA,AS06G00614-RA,AS03G02305-RA,AS03G01883-RA,AS08G04018-RA,AS06G02635-RA,AS03G00311-RA,AS05G00801-RA,AS07G00333-RA,AS02G00695-RA,AS10G01716-RA,AS06G01428-RA,AS09G00894-RA,AS07G03252-RA	0.000501179744893563
39	CC	GO:0005871	kinesin complex	AS05G00624-RA,AS04G02502-RA,AS02G02423-RA,AS07G01716-RA,AS01G00050-RA,AS05G00566-RA,AS03G00064-RA,AS09G00728-RA,AS08G03044-RA,AS01G00133-RA,AS05G01162-RA,AS05G00158-RA,AS04G01543-RA,AS01G00532-RA,AS06G00349-RA,AS06G00614-RA,AS03G02305-RA,AS03G01883-RA,AS08G04018-RA,AS06G02635-RA,AS03G00311-RA,AS05G00801-RA,AS07G00333-RA,AS02G00695-RA,AS10G01716-RA,AS06G01428-RA,AS09G00894-RA,AS07G03252-RA	0.000501179744893563
40	CC	GO:0005875	microtubule associated complex	AS05G00624-RA,AS04G02502-RA,AS02G02423-RA,AS07G01716-RA,AS01G00050-RA,AS05G00566-RA,AS03G00064-RA,AS09G00728-RA,AS08G03044-RA,AS01G00133-RA,AS05G01162-RA,AS05G00158-RA,AS10G01803-RA,AS04G01543-RA,AS04G00055-RA,AS04G00416-RA,AS01G00532-RA,AS06G00349-RA,AS06G00614-RA,AS03G02305-RA,AS03G01883-RA,AS08G04018-RA,AS06G02635-RA,AS03G00311-RA,AS05G00801-RA,AS07G00333-RA,AS02G00695-RA,AS10G01716-RA,AS09G00…	0.000501179744893563
41	BP	GO:0009404	toxin metabolic process	AS01G00665-RA,AS04G03120-RA,AS08G00772-RA,AS02G02948-RA,AS02G03252-RA,AS01G00297-RA,AS01G01230-RA,AS09G00946-RA,AS06G02877-RA,AS03G00048-RA,AS10G00938-RA,AS11G02363-RA,AS06G01525-RA,AS04G03593-RA,AS01G03608-RA,AS11G02355-RA,AS10G02600-RA,AS10G00416-RA,AS01G01847-RA,AS01G00296-RA	0.000501179744893563
42	BP	GO:0009692	ethylene metabolic process	AS05G02127-RA,AS02G01929-RA,AS05G02041-RA,AS10G02023-RA,AS02G01316-RA,AS10G01495-RA,AS06G01796-RA,AS03G00205-RA,AS08G00046-RA,AS02G03823-RA,AS01G02920-RA,AS11G01206-RA,AS01G01287-RA,AS01G00602-RA,AS01G00075-RA	0.000501179744893563
43	BP	GO:0009693	ethylene biosynthetic process	AS05G02127-RA,AS02G01929-RA,AS05G02041-RA,AS10G02023-RA,AS02G01316-RA,AS10G01495-RA,AS06G01796-RA,AS03G00205-RA,AS08G00046-RA,AS02G03823-RA,AS01G02920-RA,AS11G01206-RA,AS01G01287-RA,AS01G00602-RA,AS01G00075-RA	0.000501179744893563
44	BP	GO:0043449	cellular alkene metabolic process	AS05G02127-RA,AS02G01929-RA,AS05G02041-RA,AS10G02023-RA,AS02G01316-RA,AS10G01495-RA,AS06G01796-RA,AS03G00205-RA,AS08G00046-RA,AS02G03823-RA,AS01G02920-RA,AS11G01206-RA,AS01G01287-RA,AS01G00602-RA,AS01G00075-RA	0.000501179744893563
45	BP	GO:0043450	alkene biosynthetic process	AS05G02127-RA,AS02G01929-RA,AS05G02041-RA,AS10G02023-RA,AS02G01316-RA,AS10G01495-RA,AS06G01796-RA,AS03G00205-RA,AS08G00046-RA,AS02G03823-RA,AS01G02920-RA,AS11G01206-RA,AS01G01287-RA,AS01G00602-RA,AS01G00075-RA	0.000501179744893563
46	BP	GO:1900674	olefin biosynthetic process	AS05G02127-RA,AS02G01929-RA,AS05G02041-RA,AS10G02023-RA,AS02G01316-RA,AS10G01495-RA,AS06G01796-RA,AS03G00205-RA,AS08G00046-RA,AS02G03823-RA,AS01G02920-RA,AS11G01206-RA,AS01G01287-RA,AS01G00602-RA,AS01G00075-RA	0.000501179744893563
47	BP	GO:0007018	microtubule-based movement	AS05G00624-RA,AS06G02271-RA,AS04G02502-RA,AS02G02423-RA,AS07G01716-RA,AS01G00050-RA,AS05G00566-RA,AS03G00064-RA,AS09G00728-RA,AS08G03044-RA,AS01G00133-RA,AS05G01162-RA,AS05G00158-RA,AS10G01803-RA,AS04G01543-RA,AS04G00055-RA,AS04G00416-RA,AS01G00532-RA,AS06G00349-RA,AS06G00614-RA,AS03G02305-RA,AS03G01883-RA,AS08G04018-RA,AS06G02635-RA,AS03G00311-RA,AS05G00801-RA,AS07G00333-RA,AS02G00695-RA,AS01G03…	0.000514072863025741
48	BP	GO:0042742	defense response to bacterium	AS11G01454-RA,AS01G03794-RA,AS11G02611-RA,AS05G00803-RA,AS07G01556-RA,AS04G00212-RA,AS01G03077-RA,AS02G01103-RA,AS08G00835-RA,AS10G02659-RA,AS07G00514-RA,AS09G01737-RA,AS07G02837-RA,AS08G02566-RA,AS08G01535-RA,AS05G00467-RA,AS08G02567-RA,AS08G01893-RA,AS08G01748-RA,AS07G03020-RA,AS08G02483-RA,AS07G03369-RA,AS03G00430-RA,AS09G02314-RA,AS02G03252-RA,AS07G00004-RA,AS07G03294-RA,AS03G00372-RA,AS04G03…	0.000526478449426207
49	BP	GO:0009739	response to gibberellin	AS05G03707-RA,AS04G03648-RA,AS06G01386-RA,AS05G03296-RA,AS02G02948-RA,AS05G01648-RA,AS01G00309-RA,AS01G00297-RA,AS06G01118-RA,AS01G00336-RA,AS05G01785-RA,AS07G03050-RA,AS03G02945-RA,AS04G01183-RA,AS04G01350-RA,AS02G03773-RA,AS08G00050-RA,AS08G01807-RA,AS02G03063-RA,AS06G00350-RA,AS06G01742-RA,AS08G00705-RA,AS07G01374-RA,AS11G02363-RA,AS06G01525-RA,AS01G01194-RA,AS06G03230-RA,AS04G02252-RA,AS07G03…	0.000600077628048922
50	BP	GO:0006820	anion transport	AS04G00187-RA,AS07G01556-RA,AS10G00735-RA,AS10G00111-RA,AS03G02702-RA,AS02G01503-RA,AS08G02940-RA,AS08G01535-RA,AS08G00398-RA,AS11G01912-RA,AS08G01748-RA,AS01G00299-RA,AS10G00812-RA,AS07G00004-RA,AS08G02454-RA,AS06G00643-RA,AS06G02239-RA,AS06G02923-RA,AS07G02878-RA,AS05G01326-RA,AS07G02064-RA,AS07G03532-RA,AS09G02386-RA,AS06G01003-RA,AS04G00337-RA,AS03G01776-RA,AS03G01269-RA,AS09G00475-RA,AS02G03…	0.000657608410587088
51	BP	GO:0008300	isoprenoid catabolic process	AS09G03024-RA,AS01G02678-RA,AS02G03209-RA,AS04G02275-RA,AS02G02722-RA,AS02G03651-RA,AS01G03026-RA,AS09G03090-RA,AS09G00373-RA,AS04G00741-RA,AS06G01691-RA,AS01G00930-RA,AS10G02852-RA,AS11G02533-RA,AS08G01124-RA,AS09G01032-RA,AS01G00165-RA,AS04G02277-RA,AS02G02180-RA	0.000764533608423468
52	MF	GO:0015562	efflux transmembrane transporter activity	AS05G02457-RA,AS11G02515-RA,AS02G03234-RA,AS09G00475-RA,AS06G01355-RA,AS05G03527-RA,AS10G00451-RA,AS03G02705-RA,AS07G01458-RA,AS01G02059-RA,AS05G02230-RA,AS06G02731-RA,AS01G01231-RA,AS02G00644-RA,AS02G01323-RA,AS10G02336-RA	0.000861398787302772
53	BP	GO:1903046	meiotic cell cycle process	AS01G01202-RA,AS05G00729-RA,AS07G01874-RA,AS10G02659-RA,AS07G01574-RA,AS03G00430-RA,AS06G03409-RA,AS02G03464-RA,AS03G00311-RA,AS07G00333-RA,AS06G02923-RA,AS05G01995-RA,AS05G02481-RA,AS10G01586-RA,AS05G02678-RA,AS11G02192-RA,AS06G02243-RA,AS09G01994-RA,AS06G03008-RA,AS02G03072-RA,AS07G02472-RA,AS06G01440-RA,AS06G02179-RA,AS05G03086-RA,AS05G01477-RA,AS08G00923-RA,AS04G01378-RA,AS02G02495-RA,AS06G00…	0.000942205788072314
54	MF	GO:0046527	glucosyltransferase activity	AS11G01454-RA,AS04G02085-RA,AS03G00731-RA,AS05G01492-RA,AS01G00663-RA,AS05G02843-RA,AS01G02730-RA,AS06G03772-RA,AS02G03148-RA,AS06G02474-RA,AS04G02275-RA,AS08G02333-RA,AS10G00596-RA,AS07G00526-RA,AS11G00803-RA,AS10G01901-RA,AS06G00636-RA,AS06G03786-RA,AS11G01563-RA,AS01G00062-RA,AS06G00926-RA,AS09G02084-RA,AS01G00930-RA,AS05G03767-RA,AS09G00330-RA,AS09G00329-RA,AS05G00042-RA,AS05G01755-RA,AS04G02…	0.000947494937629989
55	BP	GO:0045087	innate immune response	AS11G02611-RA,AS01G03077-RA,AS06G03797-RA,AS08G00835-RA,AS05G03528-RA,AS09G01737-RA,AS08G02566-RA,AS04G02730-RA,AS05G03529-RA,AS05G00467-RA,AS04G01325-RA,AS08G02567-RA,AS05G00752-RA,AS08G02483-RA,AS07G03369-RA,AS09G02314-RA,AS01G03176-RA,AS05G01170-RA,AS05G00137-RA,AS03G00372-RA,AS05G03633-RA,AS11G01322-RA,AS05G00410-RA,AS01G01546-RA,AS05G02229-RA,AS03G00911-RA,AS08G02333-RA,AS05G00754-RA,AS09G00…	0.000950029702721882
56	MF	GO:0019199	transmembrane receptor protein kinase activity	AS07G01556-RA,AS02G00512-RA,AS03G02458-RA,AS08G01535-RA,AS01G00626-RA,AS11G00878-RA,AS05G00752-RA,AS08G02876-RA,AS05G01315-RA,AS11G02236-RA,AS11G02109-RA,AS04G02901-RA,AS10G00445-RA,AS05G00754-RA,AS09G01824-RA,AS06G00568-RA,AS02G02753-RA,AS06G00406-RA,AS05G00173-RA,AS06G01199-RA,AS05G02196-RA,AS04G03361-RA,AS05G02197-RA,AS03G02650-RA,AS02G01498-RA,AS11G00976-RA,AS02G01214-RA,AS08G00868-RA,AS04G03…	0.00107683014391335
57	BP	GO:0071555	cell wall organization	AS06G02856-RA,AS07G00877-RA,AS09G00319-RA,AS10G01519-RA,AS06G00015-RA,AS01G03077-RA,AS10G00849-RA,AS01G00044-RA,AS08G01535-RA,AS06G01120-RA,AS02G00147-RA,AS03G02681-RA,AS10G02677-RA,AS05G00277-RA,AS09G01824-RA,AS05G03307-RA,AS09G00768-RA,AS04G02137-RA,AS05G00534-RA,AS05G00809-RA,AS05G01444-RA,AS04G02739-RA,AS04G00580-RA,AS01G00651-RA,AS04G00944-RA,AS04G01139-RA,AS06G01443-RA,AS08G01686-RA,AS05G02…	0.00107683014391335
58	BP	GO:0009626	plant-type hypersensitive response	AS11G02611-RA,AS05G03528-RA,AS05G03529-RA,AS04G01325-RA,AS05G01170-RA,AS11G01322-RA,AS05G00410-RA,AS08G02333-RA,AS03G01427-RA,AS07G03117-RA,AS02G02681-RA,AS08G00194-RA,AS06G02475-RA,AS08G00132-RA,AS11G01475-RA,AS11G01476-RA,AS03G01656-RA,AS11G01039-RA,AS07G02643-RA,AS11G01104-RA,AS07G03225-RA,AS01G00897-RA,AS01G02770-RA,AS02G00927-RA,AS07G00591-RA,AS07G03454-RA,AS11G02450-RA,AS02G00926-RA,AS08G02…	0.00107903441541734
59	BP	GO:0034050	programmed cell death induced by symbiont	AS11G02611-RA,AS05G03528-RA,AS05G03529-RA,AS04G01325-RA,AS05G01170-RA,AS11G01322-RA,AS05G00410-RA,AS08G02333-RA,AS03G01427-RA,AS07G03117-RA,AS02G02681-RA,AS08G00194-RA,AS06G02475-RA,AS08G00132-RA,AS11G01475-RA,AS11G01476-RA,AS03G01656-RA,AS11G01039-RA,AS07G02643-RA,AS11G01104-RA,AS07G03225-RA,AS01G00897-RA,AS01G02770-RA,AS02G00927-RA,AS07G00591-RA,AS07G03454-RA,AS11G02450-RA,AS02G00926-RA,AS08G02…	0.00107903441541734
60	MF	GO:0001067	transcription regulatory region nucleic acid binding	AS06G02943-RA,AS11G02003-RA,AS05G03707-RA,AS09G02537-RA,AS06G03735-RA,AS10G01803-RA,AS01G03704-RA,AS10G00144-RA,AS10G01807-RA,AS07G02698-RA,AS08G02080-RA,AS01G03360-RA,AS04G02792-RA,AS05G01648-RA,AS01G03176-RA,AS05G00522-RA,AS05G01661-RA,AS02G03252-RA,AS09G01066-RA,AS07G01461-RA,AS07G02566-RA,AS10G02880-RA,AS01G00309-RA,AS07G01536-RA,AS10G00542-RA,AS06G01118-RA,AS07G01052-RA,AS05G02940-RA,AS07G03…	0.00121528327984214
61	BP	GO:0010252	auxin homeostasis	AS07G03019-RA,AS01G00665-RA,AS05G02457-RA,AS04G03120-RA,AS10G02023-RA,AS04G00842-RA,AS02G01316-RA,AS07G00701-RA,AS06G02877-RA,AS03G02705-RA,AS07G01458-RA,AS01G02059-RA,AS05G02230-RA,AS11G01206-RA,AS07G02808-RA,AS03G00181-RA,AS05G00555-RA,AS04G03593-RA,AS10G02336-RA,AS02G01713-RA	0.00135127624838554
62	BP	GO:1901348	positive regulation of secondary cell wall biogenesis	AS05G01661-RA,AS01G03423-RA,AS09G01066-RA,AS03G00690-RA,AS04G00551-RA,AS07G00220-RA,AS05G02391-RA,AS02G01948-RA,AS11G00148-RA	0.00138103193892244
63	BP	GO:1903340	positive regulation of cell wall organization or biogenesis	AS05G01661-RA,AS01G03423-RA,AS09G01066-RA,AS03G00690-RA,AS04G00551-RA,AS07G00220-RA,AS05G02391-RA,AS02G01948-RA,AS11G00148-RA	0.00138103193892244
64	BP	GO:0007135	meiosis II	AS01G01202-RA,AS05G00729-RA,AS06G03409-RA,AS02G03072-RA,AS05G03086-RA,AS06G00587-RA,AS06G00885-RA,AS08G02946-RA,AS01G01975-RA,AS03G02629-RA,AS04G02565-RA	0.00140208099325986
65	BP	GO:0061983	meiosis II cell cycle process	AS01G01202-RA,AS05G00729-RA,AS06G03409-RA,AS02G03072-RA,AS05G03086-RA,AS06G00587-RA,AS06G00885-RA,AS08G02946-RA,AS01G01975-RA,AS03G02629-RA,AS04G02565-RA	0.00140208099325986
66	BP	GO:0016115	terpenoid catabolic process	AS09G03024-RA,AS01G02678-RA,AS02G03209-RA,AS04G02275-RA,AS02G02722-RA,AS02G03651-RA,AS01G03026-RA,AS09G03090-RA,AS09G00373-RA,AS04G00741-RA,AS06G01691-RA,AS01G00930-RA,AS11G02533-RA,AS08G01124-RA,AS09G01032-RA,AS01G00165-RA,AS04G02277-RA,AS02G02180-RA	0.00158573093384897
67	BP	GO:0048584	positive regulation of response to stimulus	AS01G02215-RA,AS02G03765-RA,AS06G01731-RA,AS02G01168-RA,AS05G01147-RA,AS05G02321-RA,AS04G03648-RA,AS01G02346-RA,AS10G01803-RA,AS08G00835-RA,AS01G02675-RA,AS04G00055-RA,AS08G02566-RA,AS05G00467-RA,AS08G01512-RA,AS08G02567-RA,AS08G00754-RA,AS07G03345-RA,AS09G02314-RA,AS01G03176-RA,AS08G00744-RA,AS07G03294-RA,AS03G00266-RA,AS01G00309-RA,AS06G01118-RA,AS11G01322-RA,AS05G02229-RA,AS08G02333-RA,AS06G00…	0.00158573093384897
68	BP	GO:0051702	biological process involved in interaction with symbiont	AS11G02611-RA,AS05G03528-RA,AS05G03529-RA,AS04G01325-RA,AS05G01170-RA,AS11G01322-RA,AS05G00410-RA,AS08G02333-RA,AS03G01427-RA,AS07G03117-RA,AS02G02681-RA,AS08G00194-RA,AS06G02475-RA,AS08G00132-RA,AS11G01475-RA,AS11G01476-RA,AS03G01656-RA,AS11G01039-RA,AS07G02643-RA,AS11G01104-RA,AS07G03225-RA,AS01G00897-RA,AS01G02770-RA,AS02G00927-RA,AS07G00591-RA,AS07G03454-RA,AS11G02450-RA,AS02G00926-RA,AS08G02…	0.00159194776981285
69	BP	GO:0045229	external encapsulating structure organization	AS06G02856-RA,AS07G00877-RA,AS09G00319-RA,AS10G01519-RA,AS06G00015-RA,AS01G03077-RA,AS10G00849-RA,AS01G00044-RA,AS11G01797-RA,AS08G01535-RA,AS06G01120-RA,AS02G00147-RA,AS03G02681-RA,AS02G03464-RA,AS10G02677-RA,AS05G00277-RA,AS05G01995-RA,AS09G01824-RA,AS05G03307-RA,AS09G00768-RA,AS04G02137-RA,AS05G00534-RA,AS05G00809-RA,AS05G01444-RA,AS04G02739-RA,AS04G00580-RA,AS01G00651-RA,AS04G00944-RA,AS04G01…	0.00171205081180169
70	BP	GO:0048759	xylem vessel member cell differentiation	AS05G01661-RA,AS01G03423-RA,AS03G00690-RA,AS04G00551-RA,AS05G02391-RA,AS02G03541-RA,AS03G02131-RA,AS11G00148-RA	0.00171205081180169
71	MF	GO:0004497	monooxygenase activity	AS06G00605-RA,AS04G02523-RA,AS07G00670-RA,AS01G03077-RA,AS11G01811-RA,AS06G00884-RA,AS02G01893-RA,AS09G00215-RA,AS02G02948-RA,AS09G00870-RA,AS11G00187-RA,AS01G00297-RA,AS11G02648-RA,AS07G02325-RA,AS03G02657-RA,AS05G03599-RA,AS02G03651-RA,AS04G01453-RA,AS05G02643-RA,AS07G01564-RA,AS08G02096-RA,AS10G01946-RA,AS04G03292-RA,AS08G02779-RA,AS09G03090-RA,AS06G01384-RA,AS07G02696-RA,AS09G00208-RA,AS01G03…	0.00173071392314473
72	BP	GO:0055076	transition metal ion homeostasis	AS05G00447-RA,AS04G02501-RA,AS07G03020-RA,AS01G01430-RA,AS06G02324-RA,AS05G01868-RA,AS08G02095-RA,AS08G03804-RA,AS07G00701-RA,AS07G00118-RA,AS07G02795-RA,AS06G02354-RA,AS08G00562-RA,AS03G01724-RA,AS07G01198-RA,AS07G02008-RA,AS06G00996-RA,AS07G02955-RA,AS05G02748-RA,AS07G00898-RA,AS05G00135-RA,AS07G00098-RA,AS10G01934-RA,AS03G00181-RA,AS01G01287-RA,AS08G01875-RA,AS06G00990-RA,AS03G00666-RA,AS06G01…	0.00173071392314473
73	BP	GO:0120254	olefinic compound metabolic process	AS02G00275-RA,AS04G03648-RA,AS03G01133-RA,AS05G02127-RA,AS02G01929-RA,AS09G00215-RA,AS05G01648-RA,AS05G02041-RA,AS10G02023-RA,AS02G01316-RA,AS10G01495-RA,AS04G02275-RA,AS06G01796-RA,AS03G00205-RA,AS02G03651-RA,AS08G00046-RA,AS02G03823-RA,AS08G02779-RA,AS09G03090-RA,AS04G00249-RA,AS01G02920-RA,AS09G00373-RA,AS06G02360-RA,AS04G00469-RA,AS11G01206-RA,AS01G03785-RA,AS01G01287-RA,AS06G01724-RA,AS01G00…	0.00173071392314473
74	MF	GO:0080161	auxin transmembrane transporter activity	AS05G02457-RA,AS11G02515-RA,AS02G03234-RA,AS06G01355-RA,AS10G00451-RA,AS01G01402-RA,AS03G02705-RA,AS07G01458-RA,AS01G02059-RA,AS05G02230-RA,AS06G02731-RA,AS02G01323-RA,AS10G02336-RA,AS05G03513-RA	0.0018329553349832
75	MF	GO:0000981	DNA-binding transcription factor activity, RNA polymerase II-specific	AS09G02537-RA,AS01G03704-RA,AS07G02698-RA,AS04G02792-RA,AS05G01648-RA,AS09G01066-RA,AS10G02880-RA,AS01G00309-RA,AS07G01536-RA,AS10G00542-RA,AS06G01118-RA,AS07G03085-RA,AS05G01264-RA,AS09G02544-RA,AS04G00316-RA,AS10G00386-RA,AS01G03561-RA,AS10G00428-RA,AS04G01350-RA,AS06G02257-RA,AS04G00073-RA,AS01G01790-RA,AS07G00220-RA,AS05G02501-RA,AS06G02360-RA,AS01G01436-RA,AS07G01374-RA,AS10G00440-RA,AS02G01…	0.00185059171887448
76	BP	GO:0098656	anion transmembrane transport	AS10G00735-RA,AS10G00111-RA,AS03G02702-RA,AS02G01503-RA,AS08G02940-RA,AS08G01535-RA,AS08G00398-RA,AS11G01912-RA,AS08G01748-RA,AS01G00299-RA,AS10G00812-RA,AS07G00004-RA,AS06G00643-RA,AS06G02239-RA,AS07G02878-RA,AS05G01326-RA,AS07G02064-RA,AS09G02386-RA,AS06G01003-RA,AS04G00337-RA,AS03G01776-RA,AS03G01269-RA,AS09G00475-RA,AS02G03707-RA,AS02G00255-RA,AS11G02057-RA,AS02G00798-RA,AS02G00200-RA,AS05G01…	0.00190816195999845
77	MF	GO:0004888	transmembrane signaling receptor activity	AS05G02720-RA,AS07G01556-RA,AS02G00512-RA,AS04G01674-RA,AS03G02458-RA,AS08G01535-RA,AS01G00626-RA,AS11G00878-RA,AS05G00752-RA,AS08G02876-RA,AS05G01315-RA,AS11G02236-RA,AS11G02109-RA,AS04G02901-RA,AS10G00445-RA,AS05G00754-RA,AS09G01824-RA,AS06G00568-RA,AS02G02753-RA,AS06G00406-RA,AS05G00173-RA,AS06G01199-RA,AS05G02196-RA,AS04G03361-RA,AS05G02197-RA,AS03G02650-RA,AS02G01498-RA,AS11G00976-RA,AS02G01…	0.00205955999590461
78	MF	GO:0016709	oxidoreductase activity, acting on paired donors, with incorporation or reduction of molecular oxygen, NAD(P)H as one donor, and incorporation of one atom of oxygen	AS01G03077-RA,AS11G01811-RA,AS06G00884-RA,AS02G01893-RA,AS09G00215-RA,AS02G02948-RA,AS09G00870-RA,AS01G00297-RA,AS11G02648-RA,AS03G02657-RA,AS05G03599-RA,AS02G03651-RA,AS04G01453-RA,AS05G02643-RA,AS07G01564-RA,AS08G02096-RA,AS10G01946-RA,AS04G03292-RA,AS08G02779-RA,AS09G03090-RA,AS06G01384-RA,AS09G00208-RA,AS01G03824-RA,AS11G01716-RA,AS09G00373-RA,AS06G01525-RA,AS09G00047-RA,AS09G01465-RA,AS06G02…	0.00205955999590461
79	BP	GO:0022402	cell cycle process	AS11G01454-RA,AS05G00455-RA,AS04G02502-RA,AS01G01202-RA,AS01G00050-RA,AS05G00729-RA,AS04G02952-RA,AS05G02074-RA,AS06G00575-RA,AS07G02616-RA,AS01G03406-RA,AS05G01162-RA,AS02G03623-RA,AS07G01874-RA,AS10G02659-RA,AS04G01543-RA,AS08G00297-RA,AS02G02110-RA,AS01G02730-RA,AS07G01574-RA,AS06G00349-RA,AS07G03537-RA,AS03G00430-RA,AS06G00614-RA,AS03G02305-RA,AS06G03409-RA,AS01G01545-RA,AS06G03674-RA,AS02G03…	0.00207886476793484
80	BP	GO:0071398	cellular response to fatty acid	AS04G00212-RA,AS06G02726-RA,AS08G00835-RA,AS03G00197-RA,AS05G00467-RA,AS03G02717-RA,AS03G00372-RA,AS04G03343-RA,AS01G00309-RA,AS06G01118-RA,AS10G01495-RA,AS03G03003-RA,AS03G00911-RA,AS05G01785-RA,AS09G02997-RA,AS02G03383-RA,AS10G00035-RA,AS04G01350-RA,AS09G02126-RA,AS01G02041-RA,AS01G01433-RA,AS07G03192-RA,AS11G01504-RA,AS07G01388-RA,AS11G02094-RA,AS07G01374-RA,AS04G00608-RA,AS02G00852-RA,AS04G03…	0.00218980336661181
81	MF	GO:0015112	nitrate transmembrane transporter activity	AS02G01503-RA,AS08G02940-RA,AS06G02239-RA,AS11G02057-RA,AS08G01700-RA,AS06G02643-RA,AS01G01231-RA,AS03G01977-RA,AS02G00644-RA,AS04G02390-RA,AS10G01056-RA,AS06G02642-RA,AS08G00891-RA,AS08G00696-RA,AS01G01324-RA,AS01G01319-RA,AS08G00342-RA,AS02G00705-RA,AS07G02205-RA,AS07G01176-RA	0.00226016635736875
82	BP	GO:0010540	basipetal auxin transport	AS11G02515-RA,AS02G03234-RA,AS08G03196-RA,AS10G00451-RA,AS06G01070-RA,AS07G01198-RA,AS04G03255-RA,AS01G03645-RA,AS06G02731-RA,AS02G01323-RA,AS04G02680-RA	0.00240145325195423
83	MF	GO:0003774	cytoskeletal motor activity	AS05G00624-RA,AS04G02502-RA,AS02G02423-RA,AS07G01716-RA,AS01G00050-RA,AS05G00566-RA,AS03G00064-RA,AS09G00728-RA,AS08G03044-RA,AS01G00133-RA,AS05G01162-RA,AS05G00158-RA,AS04G01543-RA,AS01G00532-RA,AS06G00349-RA,AS06G00614-RA,AS03G02305-RA,AS03G01883-RA,AS08G04018-RA,AS06G02635-RA,AS03G00311-RA,AS05G00801-RA,AS07G00333-RA,AS02G00695-RA,AS07G01478-RA,AS10G01716-RA,AS03G02551-RA,AS06G01428-RA,AS09G00…	0.00267156809040966
84	BP	GO:0042447	hormone catabolic process	AS05G03772-RA,AS04G03078-RA,AS09G01022-RA,AS01G02678-RA,AS02G03209-RA,AS01G02028-RA,AS02G02722-RA,AS01G03026-RA,AS04G00741-RA,AS06G01691-RA,AS11G02533-RA,AS01G03184-RA,AS08G03959-RA,AS09G01032-RA,AS01G00165-RA	0.00267156809040966
85	BP	GO:0007140	male meiotic nuclear division	AS01G01202-RA,AS05G00729-RA,AS03G00311-RA,AS07G00333-RA,AS05G02481-RA,AS10G01586-RA,AS11G02192-RA,AS09G01994-RA,AS06G01440-RA,AS06G00587-RA,AS05G01767-RA,AS09G00600-RA,AS07G02432-RA	0.00272793646305508
86	BP	GO:0052314	phytoalexin metabolic process	AS01G00665-RA,AS04G03120-RA,AS02G02948-RA,AS02G03252-RA,AS01G00297-RA,AS01G01230-RA,AS06G02877-RA,AS03G00048-RA,AS06G01525-RA,AS04G03593-RA,AS01G03608-RA,AS01G01847-RA,AS01G00296-RA	0.00272793646305508
87	BP	GO:0052315	phytoalexin biosynthetic process	AS01G00665-RA,AS04G03120-RA,AS02G02948-RA,AS02G03252-RA,AS01G00297-RA,AS01G01230-RA,AS06G02877-RA,AS03G00048-RA,AS06G01525-RA,AS04G03593-RA,AS01G03608-RA,AS01G01847-RA,AS01G00296-RA	0.00272793646305508
88	BP	GO:0048236	plant-type sporogenesis	AS01G01202-RA,AS05G00729-RA,AS07G01874-RA,AS10G02659-RA,AS03G00430-RA,AS02G03464-RA,AS05G01995-RA,AS05G02481-RA,AS09G01994-RA,AS05G01477-RA,AS08G00923-RA,AS06G00587-RA,AS07G02307-RA,AS01G03340-RA,AS04G00244-RA,AS11G00663-RA,AS08G00406-RA,AS09G00600-RA	0.00284048105079103
89	MF	GO:0008509	anion transmembrane transporter activity	AS10G00735-RA,AS10G00111-RA,AS03G02702-RA,AS02G01503-RA,AS08G02940-RA,AS08G00398-RA,AS11G01912-RA,AS08G01748-RA,AS01G00299-RA,AS10G00812-RA,AS07G00004-RA,AS06G00643-RA,AS06G02239-RA,AS07G02878-RA,AS05G01326-RA,AS07G02064-RA,AS06G01003-RA,AS04G00337-RA,AS03G01776-RA,AS03G01269-RA,AS09G00475-RA,AS02G03707-RA,AS02G00255-RA,AS11G02057-RA,AS02G00798-RA,AS02G00200-RA,AS05G01082-RA,AS06G02156-RA,AS02G02…	0.00285954102976281
90	BP	GO:0034293	sexual sporulation	AS01G01202-RA,AS05G00729-RA,AS07G01874-RA,AS10G02659-RA,AS03G00430-RA,AS02G03464-RA,AS06G02923-RA,AS05G01995-RA,AS05G02481-RA,AS09G01994-RA,AS05G01477-RA,AS08G00923-RA,AS06G00587-RA,AS07G02307-RA,AS04G03084-RA,AS04G03085-RA,AS01G03340-RA,AS04G00244-RA,AS11G00663-RA,AS08G00406-RA,AS04G03027-RA,AS09G00600-RA	0.00292396985262843
91	BP	GO:0071395	cellular response to jasmonic acid stimulus	AS04G00212-RA,AS06G02726-RA,AS08G00835-RA,AS03G00197-RA,AS05G00467-RA,AS03G02717-RA,AS03G00372-RA,AS04G03343-RA,AS01G00309-RA,AS06G01118-RA,AS03G03003-RA,AS03G00911-RA,AS05G01785-RA,AS09G02997-RA,AS02G03383-RA,AS10G00035-RA,AS04G01350-RA,AS09G02126-RA,AS01G02041-RA,AS01G01433-RA,AS07G03192-RA,AS11G01504-RA,AS07G01388-RA,AS11G02094-RA,AS07G01374-RA,AS04G00608-RA,AS02G00852-RA,AS04G03729-RA,AS02G03…	0.00306670621976288
92	BP	GO:0000280	nuclear division	AS04G02502-RA,AS01G01202-RA,AS01G00050-RA,AS05G00729-RA,AS05G02074-RA,AS06G00575-RA,AS07G02616-RA,AS01G03406-RA,AS05G01162-RA,AS04G01543-RA,AS08G00297-RA,AS07G01574-RA,AS06G00349-RA,AS06G00614-RA,AS03G02305-RA,AS06G03409-RA,AS06G03674-RA,AS06G02635-RA,AS03G00311-RA,AS07G00333-RA,AS05G02481-RA,AS02G00695-RA,AS10G01586-RA,AS01G03208-RA,AS05G02678-RA,AS01G00063-RA,AS11G02192-RA,AS06G02243-RA,AS09G01…	0.00336532668337042
93	MF	GO:0008236	serine-type peptidase activity	AS08G01962-RA,AS02G03358-RA,AS03G02533-RA,AS01G00783-RA,AS03G00289-RA,AS02G00712-RA,AS08G01165-RA,AS07G02877-RA,AS04G01802-RA,AS07G02405-RA,AS04G01079-RA,AS11G02106-RA,AS01G03638-RA,AS07G01657-RA,AS03G02536-RA,AS09G01985-RA,AS04G01801-RA,AS03G01125-RA,AS01G00125-RA,AS02G00748-RA,AS03G01727-RA,AS03G01247-RA,AS10G00652-RA,AS03G02535-RA,AS04G02249-RA,AS03G01447-RA,AS01G01310-RA	0.00336532668337042
94	MF	GO:0017171	serine hydrolase activity	AS08G01962-RA,AS02G03358-RA,AS03G02533-RA,AS01G00783-RA,AS03G00289-RA,AS02G00712-RA,AS08G01165-RA,AS07G02877-RA,AS04G01802-RA,AS07G02405-RA,AS04G01079-RA,AS11G02106-RA,AS01G03638-RA,AS07G01657-RA,AS03G02536-RA,AS09G01985-RA,AS04G01801-RA,AS03G01125-RA,AS01G00125-RA,AS02G00748-RA,AS03G01727-RA,AS03G01247-RA,AS10G00652-RA,AS03G02535-RA,AS04G02249-RA,AS03G01447-RA,AS01G01310-RA	0.00336532668337042
95	MF	GO:0035251	UDP-glucosyltransferase activity	AS03G00731-RA,AS05G01492-RA,AS05G02843-RA,AS06G03772-RA,AS02G03148-RA,AS06G02474-RA,AS04G02275-RA,AS08G02333-RA,AS10G00596-RA,AS07G00526-RA,AS11G00803-RA,AS10G01901-RA,AS06G00636-RA,AS06G03786-RA,AS11G01563-RA,AS06G00926-RA,AS09G02084-RA,AS01G00930-RA,AS05G03767-RA,AS05G00042-RA,AS05G01755-RA,AS04G02836-RA,AS08G03750-RA,AS08G01124-RA,AS08G01558-RA,AS10G01904-RA,AS01G02015-RA,AS02G00986-RA,AS11G02…	0.00336532668337042
96	BP	GO:1900673	olefin metabolic process	AS05G02127-RA,AS02G01929-RA,AS05G02041-RA,AS10G02023-RA,AS02G01316-RA,AS10G01495-RA,AS06G01796-RA,AS03G00205-RA,AS08G00046-RA,AS02G03823-RA,AS01G02920-RA,AS11G01206-RA,AS01G01287-RA,AS01G00602-RA,AS01G00075-RA	0.00378375881395245
97	MF	GO:0000293	ferric-chelate reductase activity	AS07G03431-RA,AS08G00008-RA,AS07G02486-RA,AS08G01875-RA,AS08G00174-RA,AS07G02428-RA,AS06G01760-RA,AS07G02429-RA	0.0038099838550594
98	MF	GO:0016723	oxidoreductase activity, acting on metal ions, NAD or NADP as acceptor	AS07G03431-RA,AS08G00008-RA,AS07G02486-RA,AS08G01875-RA,AS08G00174-RA,AS07G02428-RA,AS06G01760-RA,AS07G02429-RA	0.0038099838550594
99	BP	GO:0098813	nuclear chromosome segregation	AS04G02502-RA,AS01G00050-RA,AS07G02616-RA,AS08G00297-RA,AS02G02110-RA,AS07G01574-RA,AS06G00349-RA,AS06G00614-RA,AS03G02305-RA,AS06G03409-RA,AS06G02635-RA,AS02G00695-RA,AS10G01586-RA,AS01G03208-RA,AS05G02678-RA,AS01G00063-RA,AS01G03125-RA,AS06G02243-RA,AS01G00282-RA,AS06G03008-RA,AS02G03072-RA,AS07G02472-RA,AS06G02179-RA,AS05G02701-RA,AS04G01759-RA,AS02G02495-RA,AS10G01076-RA,AS08G02946-RA,AS11G00…	0.00384806782930978
100	BP	GO:0002239	response to oomycetes	AS08G02566-RA,AS06G01907-RA,AS08G02567-RA,AS04G01672-RA,AS07G03294-RA,AS07G03532-RA,AS02G02681-RA,AS08G00194-RA,AS08G00132-RA,AS01G02260-RA,AS08G03742-RA,AS08G01768-RA,AS11G01476-RA,AS03G01656-RA,AS09G00401-RA,AS05G00401-RA,AS11G01104-RA,AS11G01786-RA,AS01G02601-RA,AS01G03184-RA,AS02G00927-RA,AS04G00983-RA,AS09G00011-RA,AS02G00926-RA,AS06G02252-RA,AS04G00731-RA,AS03G02679-RA	0.00408457822868445
101	BP	GO:0009403	toxin biosynthetic process	AS01G00665-RA,AS04G03120-RA,AS02G02948-RA,AS02G03252-RA,AS01G00297-RA,AS01G01230-RA,AS06G02877-RA,AS03G00048-RA,AS06G01525-RA,AS04G03593-RA,AS01G03608-RA,AS01G01847-RA,AS01G00296-RA	0.00408457822868445
102	MF	GO:0010329	auxin efflux transmembrane transporter activity	AS05G02457-RA,AS11G02515-RA,AS02G03234-RA,AS06G01355-RA,AS10G00451-RA,AS03G02705-RA,AS07G01458-RA,AS01G02059-RA,AS05G02230-RA,AS06G02731-RA,AS02G01323-RA,AS10G02336-RA	0.00408457822868445
103	CC	GO:0044815	DNA packaging complex	AS06G00540-RA,AS03G00483-RA,AS01G01174-RA,AS01G01212-RA,AS01G00063-RA,AS03G00491-RA,AS02G00599-RA,AS02G00588-RA,AS05G02491-RA,AS05G01245-RA,AS07G02472-RA,AS09G02135-RA,AS11G00969-RA	0.00408457822868445
104	BP	GO:0015706	nitrate transport	AS02G01503-RA,AS08G02940-RA,AS06G02239-RA,AS11G02057-RA,AS08G01700-RA,AS03G00943-RA,AS06G02643-RA,AS01G01231-RA,AS03G01977-RA,AS02G00644-RA,AS04G02390-RA,AS10G01056-RA,AS06G02642-RA,AS08G00891-RA,AS08G00696-RA,AS01G01324-RA,AS01G01319-RA,AS08G00342-RA,AS02G00705-RA,AS07G02205-RA,AS07G01176-RA	0.004293905205587
105	BP	GO:0043934	sporulation	AS01G01202-RA,AS05G00729-RA,AS07G01874-RA,AS10G02659-RA,AS07G02837-RA,AS03G00430-RA,AS02G03464-RA,AS06G02923-RA,AS05G01995-RA,AS05G02481-RA,AS09G01994-RA,AS05G01477-RA,AS08G00923-RA,AS06G00587-RA,AS07G02307-RA,AS04G03084-RA,AS04G03085-RA,AS01G03340-RA,AS04G00244-RA,AS11G00663-RA,AS08G00406-RA,AS10G00839-RA,AS04G03027-RA,AS09G00600-RA	0.00430359788600154
106	BP	GO:1903338	regulation of cell wall organization or biogenesis	AS03G00064-RA,AS05G01661-RA,AS01G03423-RA,AS03G02305-RA,AS09G01066-RA,AS06G02635-RA,AS05G01264-RA,AS03G00690-RA,AS04G00551-RA,AS07G00220-RA,AS05G02391-RA,AS02G01948-RA,AS11G00148-RA,AS08G00494-RA,AS02G02107-RA,AS02G01081-RA	0.00475991053778261
107	BP	GO:0009699	phenylpropanoid biosynthetic process	AS03G00113-RA,AS06G01386-RA,AS06G01981-RA,AS05G03296-RA,AS07G03229-RA,AS05G01648-RA,AS05G00657-RA,AS02G01011-RA,AS07G00843-RA,AS09G00734-RA,AS08G01686-RA,AS05G01212-RA,AS01G01384-RA,AS05G01525-RA,AS01G01036-RA,AS04G00078-RA,AS04G00249-RA,AS04G00573-RA,AS07G02808-RA,AS10G01761-RA,AS01G02556-RA,AS01G01069-RA,AS11G01724-RA,AS08G02926-RA,AS06G02531-RA,AS05G01218-RA,AS06G02176-RA,AS07G03244-RA,AS11G01…	0.00504822223149315
108	BP	GO:0010089	xylem development	AS09G02717-RA,AS08G03800-RA,AS07G01189-RA,AS01G03414-RA,AS01G01903-RA,AS05G01661-RA,AS01G03423-RA,AS03G02305-RA,AS01G01891-RA,AS05G00657-RA,AS05G02371-RA,AS03G00690-RA,AS04G00551-RA,AS06G00034-RA,AS05G02391-RA,AS01G01966-RA,AS02G03541-RA,AS03G02131-RA,AS06G00017-RA,AS01G00703-RA,AS11G01541-RA,AS06G03670-RA,AS11G00148-RA	0.00515511365979598
109	BP	GO:0050776	regulation of immune response	AS08G00835-RA,AS05G03666-RA,AS02G02524-RA,AS08G02566-RA,AS05G00467-RA,AS08G02567-RA,AS06G01795-RA,AS08G01893-RA,AS07G03369-RA,AS01G03176-RA,AS07G03294-RA,AS11G02109-RA,AS11G01322-RA,AS07G00915-RA,AS05G02229-RA,AS08G02333-RA,AS09G00241-RA,AS03G01427-RA,AS02G01186-RA,AS05G02196-RA,AS02G03383-RA,AS05G02197-RA,AS02G02681-RA,AS08G00194-RA,AS06G02475-RA,AS08G00132-RA,AS03G00346-RA,AS04G00367-RA,AS01G02…	0.00535986708258034
110	BP	GO:0051321	meiotic cell cycle	AS01G01202-RA,AS05G00729-RA,AS07G01874-RA,AS10G02659-RA,AS07G01574-RA,AS03G00430-RA,AS06G03409-RA,AS02G03464-RA,AS03G00311-RA,AS07G00333-RA,AS06G02923-RA,AS05G01995-RA,AS05G02481-RA,AS10G01586-RA,AS05G02678-RA,AS11G02192-RA,AS06G02243-RA,AS09G01994-RA,AS06G03008-RA,AS02G03072-RA,AS07G02472-RA,AS06G01440-RA,AS06G02179-RA,AS05G03086-RA,AS05G01477-RA,AS08G00923-RA,AS04G01378-RA,AS02G02495-RA,AS06G00…	0.00535986708258034
111	MF	GO:0004180	carboxypeptidase activity	AS03G02533-RA,AS02G00712-RA,AS08G01165-RA,AS07G02877-RA,AS04G01802-RA,AS04G01079-RA,AS01G03638-RA,AS07G01657-RA,AS03G02536-RA,AS04G01801-RA,AS03G01125-RA,AS05G00868-RA,AS02G00748-RA,AS03G01727-RA,AS10G00652-RA,AS03G02535-RA,AS01G01310-RA	0.00571732263836614
112	CC	GO:0031226	intrinsic component of plasma membrane	AS07G01391-RA,AS03G00739-RA,AS05G01265-RA,AS05G03442-RA,AS04G00807-RA,AS06G00015-RA,AS10G00111-RA,AS03G02702-RA,AS06G00548-RA,AS04G00009-RA,AS07G02837-RA,AS11G01797-RA,AS07G01974-RA,AS03G02034-RA,AS11G00332-RA,AS05G01780-RA,AS11G00422-RA,AS08G02807-RA,AS10G00067-RA,AS10G00384-RA,AS05G03671-RA,AS02G03531-RA,AS09G00741-RA,AS02G02965-RA,AS04G03498-RA,AS03G02057-RA,AS04G03502-RA,AS08G02972-RA,AS05G00…	0.00571732263836614
113	BP	GO:1902074	response to salt	AS08G01893-RA,AS09G00323-RA,AS02G01186-RA,AS02G00255-RA,AS10G00428-RA,AS05G02133-RA,AS01G01231-RA,AS03G02439-RA,AS02G00644-RA,AS01G03321-RA,AS02G00266-RA,AS03G00479-RA,AS06G00138-RA,AS09G00201-RA	0.00571732263836614
114	BP	GO:0120255	olefinic compound biosynthetic process	AS02G00275-RA,AS05G02127-RA,AS02G01929-RA,AS09G00215-RA,AS05G01648-RA,AS05G02041-RA,AS10G02023-RA,AS02G01316-RA,AS10G01495-RA,AS06G01796-RA,AS03G00205-RA,AS08G00046-RA,AS02G03823-RA,AS04G00249-RA,AS01G02920-RA,AS06G02360-RA,AS04G00469-RA,AS11G01206-RA,AS01G03785-RA,AS01G01287-RA,AS04G00474-RA,AS01G00602-RA,AS03G00761-RA,AS01G00075-RA,AS06G02176-RA,AS08G03051-RA	0.00586409762818313
115	BP	GO:0009914	hormone transport	AS09G03024-RA,AS05G02457-RA,AS06G02985-RA,AS02G03285-RA,AS04G00055-RA,AS11G01878-RA,AS07G02771-RA,AS03G00266-RA,AS11G02515-RA,AS01G01861-RA,AS03G00202-RA,AS11G02185-RA,AS02G03234-RA,AS06G01355-RA,AS08G02210-RA,AS08G03196-RA,AS10G00451-RA,AS06G01070-RA,AS07G01198-RA,AS06G01705-RA,AS01G01402-RA,AS03G02705-RA,AS07G01458-RA,AS01G02059-RA,AS02G03541-RA,AS04G03255-RA,AS06G02964-RA,AS01G03645-RA,AS07G01…	0.00594231083037468
116	BP	GO:0009636	response to toxic substance	AS09G00319-RA,AS10G01519-RA,AS06G01386-RA,AS10G01803-RA,AS01G00044-RA,AS07G03455-RA,AS06G01981-RA,AS04G01248-RA,AS08G01893-RA,AS08G00772-RA,AS05G03296-RA,AS07G03229-RA,AS02G03785-RA,AS06G01120-RA,AS02G00147-RA,AS01G03349-RA,AS02G03531-RA,AS05G00277-RA,AS02G00114-RA,AS05G03307-RA,AS05G03275-RA,AS07G03050-RA,AS02G01186-RA,AS04G01902-RA,AS04G02137-RA,AS05G00534-RA,AS02G02434-RA,AS07G01478-RA,AS09G00…	0.00610825877331384
117	BP	GO:0010087	phloem or xylem histogenesis	AS09G02717-RA,AS06G03805-RA,AS08G03800-RA,AS07G01189-RA,AS08G00835-RA,AS11G02093-RA,AS01G03414-RA,AS01G01903-RA,AS05G01661-RA,AS01G03423-RA,AS03G02305-RA,AS04G01398-RA,AS01G01891-RA,AS05G00657-RA,AS09G01824-RA,AS05G02371-RA,AS02G01783-RA,AS03G00690-RA,AS11G01588-RA,AS04G00551-RA,AS06G00034-RA,AS05G02391-RA,AS02G03823-RA,AS01G01966-RA,AS02G03541-RA,AS07G00533-RA,AS02G00128-RA,AS01G03444-RA,AS08G01…	0.00610825877331384
118	MF	GO:0038023	signaling receptor activity	AS05G02720-RA,AS07G01556-RA,AS02G00512-RA,AS04G01674-RA,AS03G02458-RA,AS08G01535-RA,AS01G00626-RA,AS11G00878-RA,AS05G00752-RA,AS08G02876-RA,AS05G01315-RA,AS11G02236-RA,AS11G02109-RA,AS04G02901-RA,AS10G00445-RA,AS05G00754-RA,AS09G01824-RA,AS06G00568-RA,AS02G02753-RA,AS06G00406-RA,AS05G00173-RA,AS06G01199-RA,AS05G02196-RA,AS04G03361-RA,AS05G02197-RA,AS03G02650-RA,AS01G00510-RA,AS02G01498-RA,AS11G00…	0.00619199893913058
119	BP	GO:0009664	plant-type cell wall organization	AS07G00877-RA,AS09G00319-RA,AS10G01519-RA,AS06G00015-RA,AS01G00044-RA,AS06G01120-RA,AS02G00147-RA,AS10G02677-RA,AS05G00277-RA,AS09G01824-RA,AS05G03307-RA,AS04G02137-RA,AS05G00534-RA,AS05G01444-RA,AS04G02739-RA,AS04G00580-RA,AS01G00651-RA,AS04G01139-RA,AS06G01443-RA,AS05G02136-RA,AS03G01679-RA,AS08G00107-RA,AS01G03520-RA,AS04G00249-RA,AS06G03666-RA,AS02G02733-RA,AS10G01331-RA,AS05G00266-RA,AS05G03…	0.00624120111172436
120	MF	GO:0004185	serine-type carboxypeptidase activity	AS03G02533-RA,AS02G00712-RA,AS08G01165-RA,AS07G02877-RA,AS04G01802-RA,AS04G01079-RA,AS01G03638-RA,AS07G01657-RA,AS03G02536-RA,AS04G01801-RA,AS03G01125-RA,AS02G00748-RA,AS03G01727-RA,AS10G00652-RA,AS03G02535-RA,AS01G01310-RA	0.00628630232931102
121	BP	GO:0060918	auxin transport	AS09G03024-RA,AS05G02457-RA,AS06G02985-RA,AS02G03285-RA,AS11G01878-RA,AS07G02771-RA,AS03G00266-RA,AS11G02515-RA,AS01G01861-RA,AS02G03234-RA,AS06G01355-RA,AS08G02210-RA,AS08G03196-RA,AS10G00451-RA,AS06G01070-RA,AS07G01198-RA,AS06G01705-RA,AS01G01402-RA,AS03G02705-RA,AS07G01458-RA,AS01G02059-RA,AS02G03541-RA,AS04G03255-RA,AS06G02964-RA,AS01G03645-RA,AS07G01546-RA,AS05G02230-RA,AS06G02731-RA,AS01G03…	0.00628630232931102
122	BP	GO:0060560	developmental growth involved in morphogenesis	AS08G00953-RA,AS05G03442-RA,AS05G02217-RA,AS03G01361-RA,AS01G00665-RA,AS06G02985-RA,AS09G00408-RA,AS01G03145-RA,AS04G03120-RA,AS11G01878-RA,AS08G01729-RA,AS05G02324-RA,AS10G00384-RA,AS07G00170-RA,AS11G02515-RA,AS09G02751-RA,AS05G01995-RA,AS07G00050-RA,AS08G02553-RA,AS02G00105-RA,AS05G03740-RA,AS03G02945-RA,AS07G01142-RA,AS02G03234-RA,AS04G00546-RA,AS06G00838-RA,AS06G02877-RA,AS08G00706-RA,AS11G00…	0.00644814097947032
123	BP	GO:0009832	plant-type cell wall biogenesis	AS11G01454-RA,AS01G01251-RA,AS05G01492-RA,AS07G02689-RA,AS04G02428-RA,AS05G02843-RA,AS05G01661-RA,AS01G03423-RA,AS03G02305-RA,AS08G02903-RA,AS09G01066-RA,AS02G01011-RA,AS05G01264-RA,AS05G03241-RA,AS07G00843-RA,AS03G00690-RA,AS04G00551-RA,AS01G03747-RA,AS07G00220-RA,AS01G01384-RA,AS05G02391-RA,AS03G01679-RA,AS01G03520-RA,AS04G00249-RA,AS06G02964-RA,AS02G01948-RA,AS01G00062-RA,AS01G03108-RA,AS08G01…	0.00676866538041701
124	BP	GO:0042538	hyperosmotic salinity response	AS02G02274-RA,AS06G03735-RA,AS01G00044-RA,AS01G02675-RA,AS10G01807-RA,AS02G01059-RA,AS01G01182-RA,AS05G01785-RA,AS10G00413-RA,AS01G00651-RA,AS02G01478-RA,AS01G03645-RA,AS02G03761-RA,AS06G03666-RA,AS11G01460-RA,AS01G03321-RA,AS01G01188-RA,AS07G02560-RA,AS03G01878-RA,AS10G02031-RA,AS01G01847-RA	0.00676866538041701
125	BP	GO:0050801	ion homeostasis	AS09G01370-RA,AS02G01503-RA,AS05G00447-RA,AS04G02501-RA,AS07G03020-RA,AS01G01430-RA,AS11G00422-RA,AS06G00643-RA,AS06G02324-RA,AS06G00273-RA,AS05G01868-RA,AS08G02095-RA,AS08G03804-RA,AS07G00701-RA,AS09G00475-RA,AS07G00118-RA,AS11G02388-RA,AS07G02795-RA,AS09G01506-RA,AS01G03561-RA,AS02G00124-RA,AS06G02354-RA,AS08G00562-RA,AS05G03527-RA,AS03G01724-RA,AS05G02191-RA,AS07G01198-RA,AS05G00257-RA,AS04G00…	0.00736660602870007
126	BP	GO:1905177	tracheary element differentiation	AS05G01661-RA,AS01G03423-RA,AS03G00690-RA,AS04G00551-RA,AS05G02391-RA,AS02G03541-RA,AS03G02131-RA,AS11G00148-RA	0.00752552345176754
127	MF	GO:0060089	molecular transducer activity	AS05G02720-RA,AS07G01556-RA,AS02G00512-RA,AS04G01674-RA,AS04G02617-RA,AS03G02458-RA,AS08G01535-RA,AS01G00626-RA,AS11G00878-RA,AS05G00752-RA,AS08G02876-RA,AS05G01315-RA,AS11G02236-RA,AS11G02109-RA,AS04G02901-RA,AS10G00445-RA,AS05G00754-RA,AS09G01824-RA,AS06G00568-RA,AS02G02753-RA,AS06G00406-RA,AS05G00173-RA,AS06G01199-RA,AS05G02196-RA,AS04G03361-RA,AS11G00348-RA,AS05G02197-RA,AS09G01001-RA,AS03G02…	0.00809973259733576
128	BP	GO:0009741	response to brassinosteroid	AS01G02215-RA,AS06G00605-RA,AS08G00953-RA,AS02G03765-RA,AS04G02523-RA,AS01G01520-RA,AS05G00116-RA,AS08G00754-RA,AS05G01661-RA,AS08G00744-RA,AS06G03307-RA,AS11G02648-RA,AS06G01118-RA,AS09G02751-RA,AS06G01218-RA,AS02G00105-RA,AS01G03598-RA,AS06G03899-RA,AS05G03751-RA,AS05G02197-RA,AS04G01079-RA,AS01G03638-RA,AS02G01498-RA,AS06G03157-RA,AS02G01214-RA,AS08G01110-RA,AS07G00065-RA,AS03G01672-RA,AS04G00…	0.00858489973303336
129	BP	GO:0009867	jasmonic acid mediated signaling pathway	AS04G00212-RA,AS06G02726-RA,AS08G00835-RA,AS03G00197-RA,AS05G00467-RA,AS03G02717-RA,AS03G00372-RA,AS04G03343-RA,AS01G00309-RA,AS06G01118-RA,AS03G00911-RA,AS05G01785-RA,AS09G02997-RA,AS02G03383-RA,AS04G01350-RA,AS09G02126-RA,AS01G02041-RA,AS01G01433-RA,AS07G03192-RA,AS11G01504-RA,AS07G01388-RA,AS11G02094-RA,AS07G01374-RA,AS04G00608-RA,AS02G00852-RA,AS04G03729-RA,AS02G03586-RA,AS04G01928-RA,AS02G01…	0.00878069569192586
130	BP	GO:0051301	cell division	AS11G01454-RA,AS05G00455-RA,AS06G03805-RA,AS08G03255-RA,AS06G00575-RA,AS04G02560-RA,AS01G03406-RA,AS05G01162-RA,AS02G03623-RA,AS07G01874-RA,AS08G00835-RA,AS04G01543-RA,AS11G02093-RA,AS01G03414-RA,AS05G02843-RA,AS01G02730-RA,AS04G00082-RA,AS05G01372-RA,AS06G03674-RA,AS05G01080-RA,AS03G00311-RA,AS06G01118-RA,AS09G01824-RA,AS10G01586-RA,AS04G01902-RA,AS07G01478-RA,AS10G00544-RA,AS10G01716-RA,AS11G02…	0.00936514918225197
131	BP	GO:0015698	inorganic anion transport	AS07G01556-RA,AS10G00111-RA,AS03G02702-RA,AS02G01503-RA,AS08G02940-RA,AS08G01748-RA,AS07G00004-RA,AS06G00643-RA,AS06G02239-RA,AS07G02878-RA,AS07G02064-RA,AS02G00255-RA,AS03G02650-RA,AS11G02057-RA,AS02G02980-RA,AS05G00257-RA,AS08G01700-RA,AS03G00943-RA,AS06G02643-RA,AS07G00770-RA,AS10G00752-RA,AS01G01231-RA,AS03G01977-RA,AS02G02929-RA,AS02G00644-RA,AS08G01022-RA,AS04G02390-RA,AS10G01056-RA,AS04G02…	0.00942901918744826
132	BP	GO:2000652	regulation of secondary cell wall biogenesis	AS05G01661-RA,AS01G03423-RA,AS09G01066-RA,AS05G01264-RA,AS03G00690-RA,AS04G00551-RA,AS07G00220-RA,AS05G02391-RA,AS02G01948-RA,AS11G00148-RA,AS08G00494-RA,AS02G01081-RA	0.00942901918744826
133	BP	GO:0002682	regulation of immune system process	AS08G00835-RA,AS05G03666-RA,AS02G02524-RA,AS08G02566-RA,AS05G00467-RA,AS08G02567-RA,AS06G01795-RA,AS08G01893-RA,AS07G03369-RA,AS01G03176-RA,AS07G03294-RA,AS11G02109-RA,AS11G01322-RA,AS07G00915-RA,AS05G02229-RA,AS08G02333-RA,AS09G00241-RA,AS03G01427-RA,AS02G01186-RA,AS05G02196-RA,AS02G03383-RA,AS05G02197-RA,AS02G02681-RA,AS08G00194-RA,AS06G02475-RA,AS08G00132-RA,AS03G00346-RA,AS04G00367-RA,AS01G02…	0.00951222581178908
134	BP	GO:0080134	regulation of response to stress	AS08G02492-RA,AS04G00212-RA,AS02G01168-RA,AS06G02726-RA,AS05G02321-RA,AS04G03648-RA,AS01G02346-RA,AS07G01874-RA,AS10G01803-RA,AS08G00835-RA,AS01G02675-RA,AS09G01737-RA,AS02G02524-RA,AS09G02374-RA,AS08G02566-RA,AS05G00467-RA,AS08G02567-RA,AS06G01795-RA,AS08G01893-RA,AS07G03345-RA,AS07G03369-RA,AS01G03176-RA,AS01G03349-RA,AS07G03294-RA,AS03G00372-RA,AS11G01322-RA,AS05G02229-RA,AS03G00911-RA,AS08G02…	0.00967661396689811
135	BP	GO:0009556	microsporogenesis	AS01G01202-RA,AS05G00729-RA,AS07G01874-RA,AS10G02659-RA,AS03G00430-RA,AS02G03464-RA,AS05G01995-RA,AS05G02481-RA,AS09G01994-RA,AS05G01477-RA,AS06G00587-RA,AS07G02307-RA,AS01G03340-RA,AS04G00244-RA,AS11G00663-RA	0.00976857665362071
136	BP	GO:0000160	phosphorelay signal transduction system	AS07G01556-RA,AS02G00564-RA,AS04G02560-RA,AS08G00835-RA,AS04G02617-RA,AS05G00467-RA,AS02G03455-RA,AS07G02566-RA,AS11G00348-RA,AS09G01001-RA,AS03G02650-RA,AS07G01899-RA,AS09G02337-RA,AS11G01588-RA,AS02G02444-RA,AS06G00996-RA,AS11G01504-RA,AS08G01990-RA,AS07G01388-RA,AS07G03360-RA,AS01G01793-RA,AS06G00983-RA,AS02G03155-RA,AS02G02929-RA,AS04G01928-RA,AS02G01356-RA,AS03G00575-RA,AS08G00834-RA,AS06G00…	0.010357049792703
137	MF	GO:0070008	serine-type exopeptidase activity	AS03G02533-RA,AS02G00712-RA,AS08G01165-RA,AS07G02877-RA,AS04G01802-RA,AS04G01079-RA,AS01G03638-RA,AS07G01657-RA,AS03G02536-RA,AS04G01801-RA,AS03G01125-RA,AS02G00748-RA,AS03G01727-RA,AS10G00652-RA,AS03G02535-RA,AS01G01310-RA	0.011784517741996
138	BP	GO:0048588	developmental cell growth	AS05G03442-RA,AS05G02217-RA,AS03G01361-RA,AS06G02985-RA,AS09G00408-RA,AS01G03145-RA,AS11G01878-RA,AS08G01729-RA,AS05G02324-RA,AS11G02515-RA,AS05G01995-RA,AS07G00050-RA,AS08G02553-RA,AS05G03740-RA,AS03G02945-RA,AS02G03234-RA,AS10G00451-RA,AS08G01838-RA,AS05G02221-RA,AS03G01679-RA,AS03G02705-RA,AS07G01458-RA,AS06G02370-RA,AS08G03167-RA,AS07G03543-RA,AS02G01520-RA,AS05G01477-RA,AS05G02767-RA,AS05G03…	0.0120040524620058
139	BP	GO:0098754	detoxification	AS09G00319-RA,AS10G01519-RA,AS01G00044-RA,AS04G01248-RA,AS08G00772-RA,AS07G03229-RA,AS02G03785-RA,AS06G01120-RA,AS02G00147-RA,AS02G03531-RA,AS05G00277-RA,AS05G03307-RA,AS05G03275-RA,AS04G01902-RA,AS04G02137-RA,AS05G00534-RA,AS09G00946-RA,AS07G01722-RA,AS09G02506-RA,AS07G02640-RA,AS05G01444-RA,AS04G00580-RA,AS01G00651-RA,AS05G02136-RA,AS08G03167-RA,AS06G03800-RA,AS10G00938-RA,AS04G00573-RA,AS06G03…	0.0120040524620058
140	BP	GO:0003333	amino acid transmembrane transport	AS10G00735-RA,AS01G00299-RA,AS05G01326-RA,AS06G01003-RA,AS09G00475-RA,AS02G03707-RA,AS02G00798-RA,AS05G01082-RA,AS06G02156-RA,AS02G00896-RA,AS05G03527-RA,AS03G00499-RA,AS01G01402-RA,AS06G00994-RA,AS09G01080-RA,AS03G00501-RA,AS01G02472-RA,AS05G02043-RA,AS05G03476-RA,AS08G00162-RA,AS02G02233-RA,AS05G03513-RA,AS01G03662-RA,AS09G00447-RA,AS08G00850-RA,AS09G00443-RA	0.0126608053113462
141	BP	GO:0006865	amino acid transport	AS10G00735-RA,AS01G00299-RA,AS05G01326-RA,AS06G01003-RA,AS09G00475-RA,AS02G03707-RA,AS02G00798-RA,AS05G01082-RA,AS06G02156-RA,AS02G00896-RA,AS05G03527-RA,AS03G00499-RA,AS01G01402-RA,AS06G00994-RA,AS09G01080-RA,AS03G00501-RA,AS01G02472-RA,AS05G02043-RA,AS05G03476-RA,AS08G00162-RA,AS02G02233-RA,AS05G03513-RA,AS01G03662-RA,AS09G00447-RA,AS08G00850-RA,AS09G00443-RA	0.0126608053113462
142	MF	GO:0015171	amino acid transmembrane transporter activity	AS10G00735-RA,AS01G00299-RA,AS05G01326-RA,AS06G01003-RA,AS09G00475-RA,AS02G03707-RA,AS02G00798-RA,AS05G01082-RA,AS06G02156-RA,AS02G00896-RA,AS05G03527-RA,AS03G00499-RA,AS01G01402-RA,AS06G00994-RA,AS09G01080-RA,AS03G00501-RA,AS01G02472-RA,AS05G02043-RA,AS05G03476-RA,AS08G00162-RA,AS02G02233-RA,AS05G03513-RA,AS01G03662-RA,AS09G00447-RA,AS08G00850-RA,AS09G00443-RA	0.0126608053113462
143	BP	GO:0010167	response to nitrate	AS11G02611-RA,AS07G03455-RA,AS02G01503-RA,AS08G02940-RA,AS06G02239-RA,AS04G00298-RA,AS11G02057-RA,AS04G02390-RA,AS01G02770-RA,AS10G01056-RA,AS08G00891-RA,AS08G00696-RA,AS01G01324-RA,AS01G01319-RA,AS08G00342-RA,AS02G00705-RA,AS07G02205-RA	0.0131913446429752
144	BP	GO:0010143	cutin biosynthetic process	AS04G03708-RA,AS11G02539-RA,AS06G03455-RA,AS01G01392-RA,AS10G00996-RA,AS05G01705-RA,AS02G00410-RA,AS03G01393-RA,AS06G00770-RA,AS11G01840-RA,AS08G00240-RA,AS08G00949-RA,AS04G03709-RA,AS05G01016-RA,AS01G01395-RA	0.0134282040612649
145	BP	GO:0043090	amino acid import	AS09G00475-RA,AS02G00798-RA,AS05G01082-RA,AS05G03527-RA,AS03G00499-RA,AS03G00501-RA,AS05G03476-RA,AS01G03662-RA	0.0144224220013282
146	MF	GO:0004601	peroxidase activity	AS09G00319-RA,AS10G01519-RA,AS01G00044-RA,AS07G03229-RA,AS02G03785-RA,AS06G01120-RA,AS02G00147-RA,AS05G00277-RA,AS05G03307-RA,AS04G02137-RA,AS05G00534-RA,AS07G01722-RA,AS07G02640-RA,AS05G01444-RA,AS01G00651-RA,AS05G02136-RA,AS04G00573-RA,AS06G03666-RA,AS05G00266-RA,AS09G01032-RA,AS05G01557-RA,AS05G02135-RA,AS05G03189-RA	0.0146692583893436
147	MF	GO:0004675	transmembrane receptor protein serine/threonine kinase activity	AS02G00512-RA,AS03G02458-RA,AS08G01535-RA,AS01G00626-RA,AS11G00878-RA,AS05G00752-RA,AS08G02876-RA,AS05G01315-RA,AS11G02236-RA,AS11G02109-RA,AS04G02901-RA,AS10G00445-RA,AS05G00754-RA,AS06G00568-RA,AS02G02753-RA,AS06G00406-RA,AS05G00173-RA,AS06G01199-RA,AS05G02196-RA,AS04G03361-RA,AS05G02197-RA,AS02G01498-RA,AS11G00976-RA,AS02G01214-RA,AS08G00868-RA,AS04G03022-RA,AS10G01049-RA,AS08G01768-RA,AS04G00…	0.0146692583893436
148	MF	GO:0016684	oxidoreductase activity, acting on peroxide as acceptor	AS09G00319-RA,AS10G01519-RA,AS01G00044-RA,AS07G03229-RA,AS02G03785-RA,AS06G01120-RA,AS02G00147-RA,AS05G00277-RA,AS05G03307-RA,AS04G02137-RA,AS05G00534-RA,AS07G01722-RA,AS07G02640-RA,AS05G01444-RA,AS01G00651-RA,AS05G02136-RA,AS04G00573-RA,AS06G03666-RA,AS05G00266-RA,AS09G01032-RA,AS05G01557-RA,AS05G02135-RA,AS05G03189-RA	0.0146692583893436
149	CC	GO:0000786	nucleosome	AS03G00483-RA,AS01G01174-RA,AS01G01212-RA,AS03G00491-RA,AS02G00599-RA,AS02G00588-RA,AS05G02491-RA,AS05G01245-RA,AS07G02472-RA,AS09G02135-RA,AS11G00969-RA	0.0148096315269696
150	MF	GO:0008574	plus-end-directed microtubule motor activity	AS02G02423-RA,AS01G00050-RA,AS05G00566-RA,AS05G00158-RA,AS01G00532-RA,AS06G00614-RA,AS03G01883-RA,AS05G00801-RA,AS06G01428-RA,AS09G00894-RA	0.0155686824321005
151	BP	GO:0140013	meiotic nuclear division	AS01G01202-RA,AS05G00729-RA,AS07G01574-RA,AS06G03409-RA,AS03G00311-RA,AS07G00333-RA,AS05G02481-RA,AS10G01586-RA,AS11G02192-RA,AS06G02243-RA,AS09G01994-RA,AS06G03008-RA,AS02G03072-RA,AS07G02472-RA,AS06G01440-RA,AS06G02179-RA,AS05G03086-RA,AS04G01378-RA,AS02G02495-RA,AS06G00587-RA,AS07G00479-RA,AS10G01076-RA,AS06G00885-RA,AS11G02060-RA,AS08G02946-RA,AS05G01767-RA,AS01G01975-RA,AS03G02629-RA,AS09G00…	0.0160952229293301
152	BP	GO:0071369	cellular response to ethylene stimulus	AS02G00564-RA,AS04G02560-RA,AS08G00835-RA,AS05G00467-RA,AS02G03455-RA,AS07G02566-RA,AS09G02842-RA,AS09G02337-RA,AS11G01588-RA,AS02G02444-RA,AS06G00996-RA,AS07G00065-RA,AS03G01672-RA,AS11G01504-RA,AS08G01990-RA,AS07G01388-RA,AS10G01934-RA,AS01G01793-RA,AS02G03155-RA,AS05G01790-RA,AS04G01928-RA,AS02G01356-RA,AS03G00575-RA,AS08G00834-RA,AS06G00990-RA,AS06G01956-RA,AS06G03556-RA,AS08G00830-RA,AS07G02…	0.0166833775766706
153	BP	GO:0046942	carboxylic acid transport	AS10G00735-RA,AS08G00398-RA,AS01G00299-RA,AS10G00812-RA,AS05G01326-RA,AS07G03532-RA,AS06G01003-RA,AS04G00337-RA,AS03G01269-RA,AS09G00475-RA,AS02G03707-RA,AS02G00798-RA,AS02G00200-RA,AS05G01082-RA,AS06G02156-RA,AS08G00004-RA,AS02G00896-RA,AS05G03527-RA,AS03G00499-RA,AS01G01402-RA,AS05G00840-RA,AS10G01555-RA,AS06G00994-RA,AS09G01080-RA,AS08G03019-RA,AS03G01046-RA,AS03G00501-RA,AS01G02472-RA,AS08G02…	0.0171747381338829
154	BP	GO:0007059	chromosome segregation	AS04G02502-RA,AS01G00050-RA,AS07G02616-RA,AS08G00297-RA,AS02G02110-RA,AS07G01574-RA,AS06G00349-RA,AS06G00614-RA,AS03G02305-RA,AS06G03409-RA,AS06G02635-RA,AS02G00695-RA,AS10G01586-RA,AS01G03208-RA,AS05G02678-RA,AS01G00063-RA,AS01G03125-RA,AS06G02243-RA,AS01G00282-RA,AS06G03008-RA,AS02G03072-RA,AS07G02472-RA,AS06G02179-RA,AS05G02701-RA,AS04G01759-RA,AS02G02495-RA,AS10G01076-RA,AS08G02946-RA,AS11G00…	0.0174361304042176
155	CC	GO:0048046	apoplast	AS02G03347-RA,AS06G00015-RA,AS02G03285-RA,AS06G01520-RA,AS04G01576-RA,AS02G03785-RA,AS05G01209-RA,AS05G00657-RA,AS06G03307-RA,AS02G03344-RA,AS03G02786-RA,AS08G00521-RA,AS04G03498-RA,AS01G00336-RA,AS09G01201-RA,AS07G03117-RA,AS05G00991-RA,AS06G03899-RA,AS08G03380-RA,AS03G03018-RA,AS05G00573-RA,AS07G01936-RA,AS03G02194-RA,AS07G02190-RA,AS08G00706-RA,AS08G02210-RA,AS06G01521-RA,AS04G02739-RA,AS04G00…	0.0174361304042176
156	BP	GO:0120252	hydrocarbon metabolic process	AS09G03024-RA,AS05G02127-RA,AS02G01929-RA,AS02G02948-RA,AS05G02041-RA,AS10G02023-RA,AS01G00297-RA,AS02G01978-RA,AS02G01316-RA,AS10G01495-RA,AS06G01796-RA,AS03G00205-RA,AS04G00648-RA,AS08G00046-RA,AS02G03823-RA,AS01G02920-RA,AS06G01525-RA,AS11G01206-RA,AS01G01287-RA,AS10G02852-RA,AS01G00602-RA,AS01G00075-RA,AS04G03200-RA,AS01G02117-RA,AS01G00296-RA	0.0181565130777052
157	BP	GO:0055065	metal ion homeostasis	AS02G01503-RA,AS05G00447-RA,AS04G02501-RA,AS07G03020-RA,AS01G01430-RA,AS06G02324-RA,AS06G00273-RA,AS05G01868-RA,AS08G02095-RA,AS08G03804-RA,AS07G00701-RA,AS07G00118-RA,AS11G02388-RA,AS07G02795-RA,AS06G02354-RA,AS08G00562-RA,AS03G01724-RA,AS07G01198-RA,AS04G00330-RA,AS02G01214-RA,AS07G02008-RA,AS11G01276-RA,AS06G00996-RA,AS07G02955-RA,AS05G02748-RA,AS07G00898-RA,AS05G00135-RA,AS07G00098-RA,AS10G01…	0.0202801201411087
158	BP	GO:1905392	plant organ morphogenesis	AS07G01556-RA,AS05G03442-RA,AS03G01361-RA,AS09G03024-RA,AS01G03145-RA,AS04G02617-RA,AS07G02983-RA,AS02G02524-RA,AS07G02837-RA,AS07G02981-RA,AS08G02442-RA,AS02G01929-RA,AS08G01512-RA,AS07G03537-RA,AS05G02324-RA,AS10G00067-RA,AS10G00384-RA,AS05G01372-RA,AS11G02515-RA,AS07G02987-RA,AS07G01052-RA,AS09G01824-RA,AS06G00881-RA,AS01G01968-RA,AS03G02945-RA,AS07G00701-RA,AS02G03234-RA,AS08G01730-RA,AS06G00…	0.0209794250710515
159	MF	GO:0004553	hydrolase activity, hydrolyzing O-glycosyl compounds	AS02G02723-RA,AS11G01636-RA,AS11G02591-RA,AS06G00015-RA,AS06G00898-RA,AS04G00009-RA,AS11G01797-RA,AS07G03236-RA,AS03G02681-RA,AS01G02771-RA,AS06G01146-RA,AS02G03464-RA,AS10G02677-RA,AS04G01856-RA,AS09G00741-RA,AS05G01718-RA,AS08G00521-RA,AS04G03498-RA,AS01G00336-RA,AS01G00936-RA,AS08G03380-RA,AS02G02346-RA,AS02G01865-RA,AS07G03048-RA,AS03G00754-RA,AS04G02739-RA,AS04G00580-RA,AS06G03453-RA,AS11G00…	0.0211968303317141
160	MF	GO:0004805	trehalose-phosphatase activity	AS04G02216-RA,AS03G00695-RA,AS09G00123-RA,AS10G00596-RA,AS08G02149-RA,AS04G03615-RA,AS06G00547-RA	0.0211968303317141
161	MF	GO:0005342	organic acid transmembrane transporter activity	AS10G00735-RA,AS08G00398-RA,AS01G00299-RA,AS10G00812-RA,AS05G01326-RA,AS06G01003-RA,AS04G00337-RA,AS03G01269-RA,AS09G00475-RA,AS02G03707-RA,AS02G00798-RA,AS02G00200-RA,AS05G01082-RA,AS06G02156-RA,AS08G00004-RA,AS02G00896-RA,AS05G03527-RA,AS03G00499-RA,AS01G01402-RA,AS05G00840-RA,AS10G01555-RA,AS06G00994-RA,AS09G01080-RA,AS08G03019-RA,AS03G01046-RA,AS03G00501-RA,AS01G02472-RA,AS05G02043-RA,AS05G03…	0.0211968303317141
162	CC	GO:0009531	secondary cell wall	AS10G00849-RA,AS03G02305-RA,AS01G03561-RA,AS05G00809-RA,AS04G00330-RA,AS02G01214-RA,AS05G02501-RA,AS07G02417-RA,AS04G01096-RA,AS11G00521-RA,AS10G00611-RA	0.0211968303317141
163	BP	GO:0009637	response to blue light	AS01G01620-RA,AS08G01512-RA,AS06G03307-RA,AS04G02674-RA,AS06G00881-RA,AS06G03899-RA,AS02G02681-RA,AS06G01355-RA,AS08G00194-RA,AS08G00132-RA,AS08G00616-RA,AS05G03579-RA,AS02G00014-RA,AS07G03192-RA,AS07G01953-RA,AS09G02198-RA,AS11G01476-RA,AS03G01656-RA,AS02G00767-RA,AS10G02794-RA,AS06G02731-RA,AS10G01892-RA,AS11G01104-RA,AS06G01323-RA,AS03G02661-RA,AS08G01217-RA,AS08G03373-RA,AS02G00901-RA,AS08G03…	0.0211968303317141
164	MF	GO:0010328	auxin influx transmembrane transporter activity	AS11G02515-RA,AS02G03234-RA,AS06G01355-RA,AS10G00451-RA,AS01G01402-RA,AS02G01323-RA,AS05G03513-RA	0.0211968303317141
165	BP	GO:0015849	organic acid transport	AS10G00735-RA,AS08G00398-RA,AS01G00299-RA,AS10G00812-RA,AS05G01326-RA,AS07G03532-RA,AS06G01003-RA,AS04G00337-RA,AS03G01269-RA,AS09G00475-RA,AS02G03707-RA,AS02G00798-RA,AS02G00200-RA,AS05G01082-RA,AS06G02156-RA,AS08G00004-RA,AS02G00896-RA,AS05G03527-RA,AS03G00499-RA,AS01G01402-RA,AS05G00840-RA,AS10G01555-RA,AS06G00994-RA,AS09G01080-RA,AS08G03019-RA,AS03G01046-RA,AS03G00501-RA,AS01G02472-RA,AS08G02…	0.0211968303317141
166	BP	GO:0031347	regulation of defense response	AS04G00212-RA,AS06G02726-RA,AS08G00835-RA,AS09G01737-RA,AS02G02524-RA,AS09G02374-RA,AS08G02566-RA,AS05G00467-RA,AS08G02567-RA,AS06G01795-RA,AS08G01893-RA,AS07G03369-RA,AS01G03176-RA,AS07G03294-RA,AS03G00372-RA,AS11G01322-RA,AS05G02229-RA,AS03G00911-RA,AS08G02333-RA,AS09G00241-RA,AS03G01427-RA,AS02G00114-RA,AS02G01186-RA,AS07G00701-RA,AS05G02196-RA,AS05G02197-RA,AS02G02681-RA,AS01G03242-RA,AS08G00…	0.0211968303317141
167	MF	GO:0046943	carboxylic acid transmembrane transporter activity	AS10G00735-RA,AS08G00398-RA,AS01G00299-RA,AS10G00812-RA,AS05G01326-RA,AS06G01003-RA,AS04G00337-RA,AS03G01269-RA,AS09G00475-RA,AS02G03707-RA,AS02G00798-RA,AS02G00200-RA,AS05G01082-RA,AS06G02156-RA,AS08G00004-RA,AS02G00896-RA,AS05G03527-RA,AS03G00499-RA,AS01G01402-RA,AS05G00840-RA,AS10G01555-RA,AS06G00994-RA,AS09G01080-RA,AS08G03019-RA,AS03G01046-RA,AS03G00501-RA,AS01G02472-RA,AS05G02043-RA,AS05G03…	0.0211968303317141
168	MF	GO:0052634	C-19 gibberellin 2-beta-dioxygenase activity	AS01G02678-RA,AS02G03209-RA,AS02G02722-RA,AS01G03026-RA,AS06G01691-RA,AS11G02533-RA,AS01G00165-RA	0.0211968303317141
169	BP	GO:0055072	iron ion homeostasis	AS07G03020-RA,AS06G02324-RA,AS08G03804-RA,AS07G00701-RA,AS06G02354-RA,AS08G00562-RA,AS06G00996-RA,AS07G02955-RA,AS07G00898-RA,AS05G00135-RA,AS10G01934-RA,AS03G00181-RA,AS08G01875-RA,AS06G00990-RA,AS03G00666-RA,AS06G01956-RA,AS08G00174-RA,AS07G02428-RA,AS09G01065-RA,AS06G00999-RA,AS07G02429-RA	0.0211968303317141
170	BP	GO:0070370	cellular heat acclimation	AS02G03252-RA,AS09G01824-RA,AS03G00048-RA,AS09G02928-RA,AS02G01137-RA,AS02G03055-RA,AS06G01051-RA	0.0211968303317141
171	BP	GO:1903825	organic acid transmembrane transport	AS10G00735-RA,AS08G00398-RA,AS01G00299-RA,AS10G00812-RA,AS05G01326-RA,AS06G01003-RA,AS04G00337-RA,AS03G01269-RA,AS09G00475-RA,AS02G03707-RA,AS02G00798-RA,AS02G00200-RA,AS05G01082-RA,AS06G02156-RA,AS08G00004-RA,AS02G00896-RA,AS05G03527-RA,AS03G00499-RA,AS01G01402-RA,AS05G00840-RA,AS10G01555-RA,AS06G00994-RA,AS09G01080-RA,AS08G03019-RA,AS03G01046-RA,AS03G00501-RA,AS01G02472-RA,AS05G02043-RA,AS05G03…	0.0211968303317141
172	BP	GO:1905039	carboxylic acid transmembrane transport	AS10G00735-RA,AS08G00398-RA,AS01G00299-RA,AS10G00812-RA,AS05G01326-RA,AS06G01003-RA,AS04G00337-RA,AS03G01269-RA,AS09G00475-RA,AS02G03707-RA,AS02G00798-RA,AS02G00200-RA,AS05G01082-RA,AS06G02156-RA,AS08G00004-RA,AS02G00896-RA,AS05G03527-RA,AS03G00499-RA,AS01G01402-RA,AS05G00840-RA,AS10G01555-RA,AS06G00994-RA,AS09G01080-RA,AS08G03019-RA,AS03G01046-RA,AS03G00501-RA,AS01G02472-RA,AS05G02043-RA,AS05G03…	0.0211968303317141
173	BP	GO:0005991	trehalose metabolic process	AS05G00663-RA,AS05G02843-RA,AS04G02216-RA,AS03G00695-RA,AS09G00123-RA,AS10G00596-RA,AS08G02149-RA,AS10G02943-RA,AS08G01558-RA,AS04G03615-RA,AS06G00547-RA,AS04G03002-RA,AS01G01847-RA	0.0227921645714345
174	BP	GO:0007166	cell surface receptor signaling pathway	AS06G02271-RA,AS02G00512-RA,AS05G02321-RA,AS01G00783-RA,AS03G02458-RA,AS08G01535-RA,AS01G00626-RA,AS03G00295-RA,AS11G00878-RA,AS05G00752-RA,AS08G02876-RA,AS05G01315-RA,AS11G02236-RA,AS11G02109-RA,AS04G02901-RA,AS10G00445-RA,AS05G00754-RA,AS06G00568-RA,AS02G02753-RA,AS06G00406-RA,AS05G00173-RA,AS06G01199-RA,AS05G02196-RA,AS04G03361-RA,AS05G02197-RA,AS02G01498-RA,AS01G02512-RA,AS11G00976-RA,AS02G01…	0.0227921645714345
175	BP	GO:0009624	response to nematode	AS09G00933-RA,AS11G02591-RA,AS06G00575-RA,AS01G03406-RA,AS09G01737-RA,AS08G00398-RA,AS07G03020-RA,AS01G01430-RA,AS01G03349-RA,AS03G01269-RA,AS02G03707-RA,AS06G01355-RA,AS08G03684-RA,AS08G01838-RA,AS07G01198-RA,AS02G03569-RA,AS08G03133-RA,AS01G01402-RA,AS06G00932-RA,AS10G00203-RA,AS05G00135-RA,AS01G01231-RA,AS03G00320-RA,AS01G02749-RA,AS02G00644-RA,AS01G02021-RA,AS11G01724-RA,AS02G03147-RA,AS10G01…	0.0227921645714345
176	BP	GO:0010015	root morphogenesis	AS07G01556-RA,AS05G03442-RA,AS03G01361-RA,AS01G03145-RA,AS04G02617-RA,AS02G02524-RA,AS07G02837-RA,AS08G02442-RA,AS02G01929-RA,AS07G03537-RA,AS05G02324-RA,AS10G00067-RA,AS10G00384-RA,AS05G01372-RA,AS11G02515-RA,AS07G01052-RA,AS06G00881-RA,AS03G02945-RA,AS07G00701-RA,AS02G03234-RA,AS08G01730-RA,AS06G00838-RA,AS03G02650-RA,AS11G02192-RA,AS10G00143-RA,AS01G03561-RA,AS02G02476-RA,AS10G00451-RA,AS08G01…	0.0227921645714345
177	BP	GO:0016103	diterpenoid catabolic process	AS01G02678-RA,AS02G03209-RA,AS02G02722-RA,AS01G03026-RA,AS04G00741-RA,AS06G01691-RA,AS11G02533-RA,AS09G01032-RA,AS01G00165-RA	0.0227921645714345
178	BP	GO:0016107	sesquiterpenoid catabolic process	AS04G02275-RA,AS02G03651-RA,AS09G03090-RA,AS09G00373-RA,AS01G00930-RA,AS08G01124-RA,AS04G02277-RA,AS02G02180-RA	0.0227921645714345
179	CC	GO:0031225	anchored component of membrane	AS01G01251-RA,AS05G01265-RA,AS07G02689-RA,AS06G00015-RA,AS06G00548-RA,AS04G00009-RA,AS11G01797-RA,AS11G00332-RA,AS05G01780-RA,AS08G02807-RA,AS10G00384-RA,AS08G02903-RA,AS09G00741-RA,AS04G03498-RA,AS03G02942-RA,AS08G02972-RA,AS05G00991-RA,AS02G02346-RA,AS02G01865-RA,AS07G03048-RA,AS03G00754-RA,AS08G00706-RA,AS04G02739-RA,AS06G03453-RA,AS08G02145-RA,AS07G00129-RA,AS06G01937-RA,AS11G01081-RA,AS06G00…	0.0227921645714345
180	BP	GO:0043290	apocarotenoid catabolic process	AS04G02275-RA,AS02G03651-RA,AS09G03090-RA,AS09G00373-RA,AS01G00930-RA,AS08G01124-RA,AS04G02277-RA,AS02G02180-RA	0.0227921645714345
181	BP	GO:0045487	gibberellin catabolic process	AS01G02678-RA,AS02G03209-RA,AS02G02722-RA,AS01G03026-RA,AS04G00741-RA,AS06G01691-RA,AS11G02533-RA,AS09G01032-RA,AS01G00165-RA	0.0227921645714345
182	BP	GO:0046345	abscisic acid catabolic process	AS04G02275-RA,AS02G03651-RA,AS09G03090-RA,AS09G00373-RA,AS01G00930-RA,AS08G01124-RA,AS04G02277-RA,AS02G02180-RA	0.0227921645714345
183	BP	GO:1900378	positive regulation of secondary metabolite biosynthetic process	AS01G00665-RA,AS04G03120-RA,AS05G00657-RA,AS06G02877-RA,AS06G00996-RA,AS04G03593-RA,AS06G00990-RA,AS06G00999-RA	0.0227921645714345
184	BP	GO:1903047	mitotic cell cycle process	AS11G01454-RA,AS05G00455-RA,AS04G02502-RA,AS01G00050-RA,AS04G02952-RA,AS05G02074-RA,AS06G00575-RA,AS07G02616-RA,AS01G03406-RA,AS05G01162-RA,AS07G01874-RA,AS04G01543-RA,AS08G00297-RA,AS01G02730-RA,AS06G00349-RA,AS07G03537-RA,AS06G00614-RA,AS03G02305-RA,AS06G03409-RA,AS06G03674-RA,AS07G00170-RA,AS06G02635-RA,AS03G00311-RA,AS02G00695-RA,AS01G03800-RA,AS10G01586-RA,AS01G03208-RA,AS02G01509-RA,AS07G01…	0.0227921645714345
185	BP	GO:2000022	regulation of jasmonic acid mediated signaling pathway	AS04G00212-RA,AS06G02726-RA,AS03G02717-RA,AS03G00372-RA,AS01G00309-RA,AS06G01118-RA,AS03G00911-RA,AS02G03383-RA,AS09G02126-RA,AS01G01433-RA,AS11G02094-RA,AS04G03729-RA,AS07G00873-RA,AS03G01743-RA,AS05G02093-RA,AS11G01951-RA	0.0238493157209867
186	BP	GO:0000819	sister chromatid segregation	AS04G02502-RA,AS07G02616-RA,AS08G00297-RA,AS02G02110-RA,AS06G00349-RA,AS06G00614-RA,AS03G02305-RA,AS06G03409-RA,AS06G02635-RA,AS02G00695-RA,AS01G03208-RA,AS05G02678-RA,AS01G00063-RA,AS01G03125-RA,AS01G00282-RA,AS06G03008-RA,AS02G03072-RA,AS05G02701-RA,AS04G01759-RA,AS08G02946-RA,AS11G00844-RA,AS03G02629-RA,AS04G02565-RA	0.02396153719779
187	BP	GO:0048646	anatomical structure formation involved in morphogenesis	AS06G02271-RA,AS02G02274-RA,AS09G03024-RA,AS08G03255-RA,AS06G00575-RA,AS01G03406-RA,AS05G01162-RA,AS07G01874-RA,AS04G01543-RA,AS04G02617-RA,AS01G03414-RA,AS02G02524-RA,AS07G02837-RA,AS11G01797-RA,AS02G01929-RA,AS07G03537-RA,AS10G00067-RA,AS05G01372-RA,AS02G03464-RA,AS07G00170-RA,AS03G00311-RA,AS04G02955-RA,AS07G02987-RA,AS06G02923-RA,AS05G01995-RA,AS06G00881-RA,AS01G01968-RA,AS09G00123-RA,AS08G01…	0.02396153719779
188	MF	GO:0015103	inorganic anion transmembrane transporter activity	AS10G00111-RA,AS03G02702-RA,AS02G01503-RA,AS08G02940-RA,AS08G01748-RA,AS07G00004-RA,AS06G00643-RA,AS06G02239-RA,AS07G02878-RA,AS07G02064-RA,AS04G00337-RA,AS02G00255-RA,AS11G02057-RA,AS02G02980-RA,AS08G01700-RA,AS06G02643-RA,AS07G00770-RA,AS01G01231-RA,AS03G01977-RA,AS02G00644-RA,AS04G02390-RA,AS10G01056-RA,AS02G00266-RA,AS06G02642-RA,AS08G00891-RA,AS08G00696-RA,AS01G01324-RA,AS04G03420-RA,AS01G01…	0.0252467507678281
189	MF	GO:0008194	UDP-glycosyltransferase activity	AS06G02856-RA,AS03G00731-RA,AS05G01492-RA,AS07G03527-RA,AS05G02843-RA,AS06G03772-RA,AS05G00692-RA,AS02G03148-RA,AS06G02474-RA,AS04G02275-RA,AS08G02333-RA,AS10G00596-RA,AS07G00973-RA,AS07G00526-RA,AS11G00803-RA,AS10G01901-RA,AS06G00636-RA,AS06G03786-RA,AS05G01015-RA,AS11G01563-RA,AS06G00926-RA,AS09G02084-RA,AS01G00930-RA,AS05G03767-RA,AS04G00994-RA,AS05G00042-RA,AS05G01755-RA,AS04G02836-RA,AS08G03…	0.0263905667193537
190	BP	GO:0044403	biological process involved in symbiotic interaction	AS11G02611-RA,AS08G00883-RA,AS06G00575-RA,AS01G03406-RA,AS05G03528-RA,AS11G00774-RA,AS05G03529-RA,AS04G01325-RA,AS01G03176-RA,AS05G01170-RA,AS11G01322-RA,AS05G00410-RA,AS08G02333-RA,AS03G01427-RA,AS07G03117-RA,AS02G03383-RA,AS02G02681-RA,AS08G00194-RA,AS09G02445-RA,AS06G02475-RA,AS08G00132-RA,AS03G00346-RA,AS08G01768-RA,AS11G01475-RA,AS11G01476-RA,AS03G01656-RA,AS05G01896-RA,AS11G01039-RA,AS07G02…	0.0273217909113172
191	BP	GO:0009639	response to red or far red light	AS05G02217-RA,AS05G01147-RA,AS02G02471-RA,AS01G03077-RA,AS02G03623-RA,AS01G02678-RA,AS08G01512-RA,AS09G00215-RA,AS02G03209-RA,AS10G02023-RA,AS03G00372-RA,AS06G03307-RA,AS04G00327-RA,AS02G01316-RA,AS03G00911-RA,AS04G02674-RA,AS06G03899-RA,AS11G00348-RA,AS06G01355-RA,AS02G03651-RA,AS02G03773-RA,AS05G03579-RA,AS07G02008-RA,AS01G01119-RA,AS02G00014-RA,AS07G03192-RA,AS08G02779-RA,AS09G03090-RA,AS07G01…	0.0275876748038287
192	BP	GO:0045491	xylan metabolic process	AS06G02856-RA,AS08G03558-RA,AS05G01492-RA,AS07G00877-RA,AS04G02428-RA,AS05G01661-RA,AS01G02343-RA,AS08G00521-RA,AS11G01956-RA,AS06G01092-RA,AS02G02071-RA,AS05G00042-RA,AS11G01586-RA,AS03G02428-RA,AS04G00867-RA	0.0283260853248042
193	BP	GO:0010929	positive regulation of auxin mediated signaling pathway	AS03G00266-RA,AS01G00309-RA,AS06G01118-RA,AS04G03729-RA,AS01G00312-RA,AS08G01227-RA,AS09G01808-RA,AS03G01743-RA,AS07G00611-RA,AS07G01277-RA,AS05G02093-RA	0.0287627255138453
194	BP	GO:0006972	hyperosmotic response	AS02G02274-RA,AS06G03735-RA,AS01G00044-RA,AS01G02675-RA,AS10G01807-RA,AS02G01059-RA,AS01G01182-RA,AS05G01785-RA,AS10G00413-RA,AS01G00651-RA,AS02G01478-RA,AS01G03645-RA,AS02G03761-RA,AS06G03666-RA,AS11G01460-RA,AS01G03321-RA,AS01G01188-RA,AS07G02560-RA,AS03G01878-RA,AS10G02031-RA,AS07G02432-RA,AS01G01847-RA	0.0288510400796183
195	BP	GO:0009743	response to carbohydrate	AS07G01556-RA,AS04G02560-RA,AS05G02457-RA,AS07G03455-RA,AS04G00055-RA,AS05G02843-RA,AS09G00215-RA,AS03G00559-RA,AS09G00323-RA,AS07G02566-RA,AS02G03148-RA,AS02G01227-RA,AS11G02185-RA,AS03G01269-RA,AS04G00298-RA,AS03G02650-RA,AS05G00020-RA,AS02G00896-RA,AS06G03780-RA,AS07G00526-RA,AS09G02198-RA,AS06G00350-RA,AS06G00826-RA,AS06G00993-RA,AS05G02133-RA,AS02G02929-RA,AS01G01896-RA,AS09G02037-RA,AS03G00…	0.0292363556466297
196	BP	GO:0007178	transmembrane receptor protein serine/threonine kinase signaling pathway	AS02G00512-RA,AS03G02458-RA,AS08G01535-RA,AS01G00626-RA,AS11G00878-RA,AS05G00752-RA,AS08G02876-RA,AS05G01315-RA,AS11G02236-RA,AS11G02109-RA,AS04G02901-RA,AS10G00445-RA,AS05G00754-RA,AS06G00568-RA,AS02G02753-RA,AS06G00406-RA,AS05G00173-RA,AS06G01199-RA,AS05G02196-RA,AS04G03361-RA,AS05G02197-RA,AS02G01498-RA,AS11G00976-RA,AS02G01214-RA,AS08G00868-RA,AS04G03022-RA,AS10G01049-RA,AS08G01768-RA,AS04G00…	0.0312411346497454
197	CC	GO:0046658	anchored component of plasma membrane	AS05G01265-RA,AS06G00015-RA,AS06G00548-RA,AS04G00009-RA,AS11G01797-RA,AS11G00332-RA,AS05G01780-RA,AS08G02807-RA,AS10G00384-RA,AS09G00741-RA,AS04G03498-RA,AS08G02972-RA,AS05G00991-RA,AS02G02346-RA,AS02G01865-RA,AS07G03048-RA,AS03G00754-RA,AS08G00706-RA,AS04G02739-RA,AS06G03453-RA,AS08G02145-RA,AS07G00129-RA,AS06G01937-RA,AS11G01081-RA,AS06G00946-RA,AS02G00792-RA,AS10G01486-RA,AS08G00138-RA,AS07G02…	0.0348609758758557
198	BP	GO:0006828	manganese ion transport	AS07G03020-RA,AS08G03804-RA,AS07G02795-RA,AS04G02705-RA,AS07G02398-RA,AS05G02270-RA,AS10G01934-RA,AS06G01956-RA,AS05G00041-RA	0.0357440210125405
199	BP	GO:0060919	auxin influx	AS11G02515-RA,AS02G03234-RA,AS06G01355-RA,AS10G00451-RA,AS01G01402-RA,AS02G01323-RA,AS05G03513-RA	0.0369684432737979
200	MF	GO:0090447	glycerol-3-phosphate 2-O-acyltransferase activity	AS11G02539-RA,AS06G03455-RA,AS10G00996-RA,AS11G01840-RA,AS08G00240-RA,AS05G01016-RA,AS01G01395-RA	0.0369684432737979
201	MF	GO:0005381	iron ion transmembrane transporter activity	AS08G03804-RA,AS09G02842-RA,AS07G02795-RA,AS02G03569-RA,AS07G00898-RA,AS05G00135-RA,AS10G01934-RA,AS06G01956-RA	0.0372733806213275
202	BP	GO:0034755	iron ion transmembrane transport	AS08G03804-RA,AS09G02842-RA,AS07G02795-RA,AS02G03569-RA,AS07G00898-RA,AS05G00135-RA,AS10G01934-RA,AS06G01956-RA	0.0372733806213275
203	BP	GO:1901616	organic hydroxy compound catabolic process	AS08G00884-RA,AS04G02275-RA,AS09G00946-RA,AS02G03651-RA,AS09G03090-RA,AS09G00373-RA,AS10G00938-RA,AS01G00930-RA,AS07G02769-RA,AS01G03184-RA,AS08G01124-RA,AS10G02600-RA,AS04G02277-RA,AS02G02180-RA,AS02G01713-RA,AS05G01458-RA	0.0389715704781226
204	BP	GO:0048443	stamen development	AS05G03528-RA,AS08G00466-RA,AS05G03529-RA,AS04G01325-RA,AS07G03649-RA,AS05G01170-RA,AS03G00372-RA,AS10G02677-RA,AS04G00327-RA,AS05G03652-RA,AS05G00410-RA,AS03G00911-RA,AS05G00991-RA,AS01G01968-RA,AS06G00083-RA,AS06G01355-RA,AS04G01350-RA,AS07G00579-RA,AS09G00926-RA,AS07G01374-RA,AS06G02731-RA,AS07G02307-RA,AS04G00571-RA,AS06G02590-RA,AS01G03340-RA,AS07G03454-RA,AS04G00244-RA,AS11G00663-RA,AS06G03…	0.0391743720043196
205	BP	GO:0048466	androecium development	AS05G03528-RA,AS08G00466-RA,AS05G03529-RA,AS04G01325-RA,AS07G03649-RA,AS05G01170-RA,AS03G00372-RA,AS10G02677-RA,AS04G00327-RA,AS05G03652-RA,AS05G00410-RA,AS03G00911-RA,AS05G00991-RA,AS01G01968-RA,AS06G00083-RA,AS06G01355-RA,AS04G01350-RA,AS07G00579-RA,AS09G00926-RA,AS07G01374-RA,AS06G02731-RA,AS07G02307-RA,AS04G00571-RA,AS06G02590-RA,AS01G03340-RA,AS07G03454-RA,AS04G00244-RA,AS11G00663-RA,AS06G03…	0.0391743720043196
206	MF	GO:0080043	quercetin 3-O-glucosyltransferase activity	AS06G03772-RA,AS06G02474-RA,AS04G02275-RA,AS10G01901-RA,AS06G00636-RA,AS06G03786-RA,AS11G01563-RA,AS09G02084-RA,AS01G00930-RA,AS08G03750-RA,AS08G01124-RA,AS10G01904-RA,AS02G00986-RA,AS06G03787-RA,AS04G02277-RA,AS02G02180-RA,AS04G01082-RA,AS03G01636-RA,AS09G00300-RA,AS03G02763-RA,AS07G02435-RA,AS05G00930-RA,AS06G02143-RA,AS05G01242-RA,AS10G02177-RA	0.0391743720043196
207	MF	GO:0080044	quercetin 7-O-glucosyltransferase activity	AS06G03772-RA,AS06G02474-RA,AS04G02275-RA,AS10G01901-RA,AS06G00636-RA,AS06G03786-RA,AS11G01563-RA,AS09G02084-RA,AS01G00930-RA,AS08G03750-RA,AS08G01124-RA,AS10G01904-RA,AS02G00986-RA,AS06G03787-RA,AS04G02277-RA,AS02G02180-RA,AS04G01082-RA,AS03G01636-RA,AS09G00300-RA,AS03G02763-RA,AS07G02435-RA,AS05G00930-RA,AS06G02143-RA,AS05G01242-RA,AS10G02177-RA	0.0391743720043196
208	BP	GO:0000070	mitotic sister chromatid segregation	AS04G02502-RA,AS07G02616-RA,AS08G00297-RA,AS06G00349-RA,AS06G00614-RA,AS03G02305-RA,AS06G03409-RA,AS06G02635-RA,AS02G00695-RA,AS01G03208-RA,AS05G02678-RA,AS01G00063-RA,AS01G00282-RA,AS02G03072-RA,AS05G02701-RA,AS04G01759-RA,AS04G02565-RA	0.039780129589957
209	BP	GO:0002684	positive regulation of immune system process	AS08G00835-RA,AS05G00467-RA,AS07G03294-RA,AS11G01322-RA,AS05G02229-RA,AS08G02333-RA,AS09G00241-RA,AS05G02196-RA,AS02G03383-RA,AS05G02197-RA,AS01G02041-RA,AS06G02492-RA,AS02G03075-RA,AS07G03192-RA,AS07G01684-RA,AS08G01768-RA,AS08G01990-RA,AS07G01388-RA,AS05G03086-RA,AS10G00440-RA,AS02G03172-RA,AS05G00401-RA,AS04G03186-RA,AS06G00961-RA,AS06G00885-RA,AS01G02601-RA,AS08G00834-RA,AS02G02465-RA,AS11G02…	0.0398597883270444
210	BP	GO:0009825	multidimensional cell growth	AS06G02379-RA,AS08G02442-RA,AS08G02807-RA,AS03G02681-RA,AS04G00506-RA,AS07G03288-RA,AS07G00065-RA,AS03G01672-RA,AS04G03255-RA,AS02G02733-RA,AS05G00303-RA,AS06G02975-RA,AS04G00505-RA,AS09G00330-RA,AS09G00329-RA,AS01G00938-RA,AS02G00375-RA,AS07G00066-RA,AS04G02795-RA	0.0410544777076511
211	BP	GO:0055081	anion homeostasis	AS01G01430-RA,AS09G00475-RA,AS07G00118-RA,AS09G01506-RA,AS05G03527-RA,AS03G01724-RA,AS05G02191-RA,AS03G00499-RA,AS07G02008-RA,AS06G00932-RA,AS07G01374-RA,AS07G00098-RA,AS04G02666-RA,AS03G00501-RA,AS01G02021-RA,AS07G01353-RA,AS05G03476-RA,AS01G03419-RA,AS01G03662-RA	0.0410544777076511
212	MF	GO:0042578	phosphoric ester hydrolase activity	AS07G01391-RA,AS07G01556-RA,AS06G02710-RA,AS05G00663-RA,AS02G03551-RA,AS10G02659-RA,AS03G01133-RA,AS05G02843-RA,AS11G00774-RA,AS08G00884-RA,AS06G01795-RA,AS03G00430-RA,AS03G00954-RA,AS10G02389-RA,AS04G02216-RA,AS06G03032-RA,AS06G01278-RA,AS03G00695-RA,AS11G02185-RA,AS09G00123-RA,AS10G00596-RA,AS01G03661-RA,AS11G01959-RA,AS03G02650-RA,AS09G01506-RA,AS08G03386-RA,AS09G01018-RA,AS09G02943-RA,AS10G00…	0.0423791252317487
213	BP	GO:0009932	cell tip growth	AS05G02217-RA,AS06G02985-RA,AS09G00408-RA,AS11G01878-RA,AS08G01729-RA,AS10G00384-RA,AS05G01995-RA,AS07G00050-RA,AS08G02553-RA,AS05G03740-RA,AS07G01142-RA,AS08G00706-RA,AS11G00347-RA,AS08G01838-RA,AS05G02221-RA,AS03G01679-RA,AS06G02370-RA,AS08G03167-RA,AS08G02145-RA,AS07G03543-RA,AS09G00126-RA,AS02G01520-RA,AS05G01477-RA,AS05G02767-RA,AS05G03736-RA,AS04G01627-RA,AS05G02110-RA,AS10G01485-RA,AS04G01…	0.0440836097185329
214	BP	GO:0050778	positive regulation of immune response	AS08G00835-RA,AS05G00467-RA,AS07G03294-RA,AS11G01322-RA,AS05G02229-RA,AS08G02333-RA,AS09G00241-RA,AS05G02196-RA,AS02G03383-RA,AS05G02197-RA,AS01G02041-RA,AS06G02492-RA,AS02G03075-RA,AS07G03192-RA,AS07G01684-RA,AS08G01768-RA,AS08G01990-RA,AS07G01388-RA,AS05G03086-RA,AS10G00440-RA,AS02G03172-RA,AS05G00401-RA,AS04G03186-RA,AS06G00961-RA,AS06G00885-RA,AS01G02601-RA,AS08G00834-RA,AS02G02465-RA,AS01G01…	0.0440836097185329
215	BP	GO:0071446	cellular response to salicylic acid stimulus	AS06G01731-RA,AS07G03294-RA,AS01G00309-RA,AS06G01118-RA,AS01G01546-RA,AS03G03003-RA,AS05G01785-RA,AS02G03383-RA,AS02G02681-RA,AS08G00194-RA,AS10G00035-RA,AS08G00132-RA,AS11G01476-RA,AS09G00926-RA,AS03G01656-RA,AS11G01104-RA,AS04G03729-RA,AS07G03225-RA,AS07G01193-RA,AS02G00927-RA,AS03G01743-RA,AS02G00926-RA,AS05G00388-RA,AS07G02432-RA,AS05G02093-RA	0.0452672912875398
216	BP	GO:0023056	positive regulation of signaling	AS01G02215-RA,AS02G03765-RA,AS06G01731-RA,AS05G02321-RA,AS04G03648-RA,AS10G01803-RA,AS04G00055-RA,AS08G02566-RA,AS08G02567-RA,AS08G00754-RA,AS01G03176-RA,AS08G00744-RA,AS03G00266-RA,AS01G00309-RA,AS06G01118-RA,AS05G02229-RA,AS05G02197-RA,AS11G02192-RA,AS04G03214-RA,AS08G00616-RA,AS02G03063-RA,AS05G01586-RA,AS08G00576-RA,AS02G03072-RA,AS10G01751-RA,AS04G03729-RA,AS01G00312-RA,AS07G01298-RA,AS06G01…	0.045311482870709
217	BP	GO:0005992	trehalose biosynthetic process	AS05G00663-RA,AS05G02843-RA,AS04G02216-RA,AS03G00695-RA,AS09G00123-RA,AS10G00596-RA,AS08G02149-RA,AS08G01558-RA,AS04G03615-RA,AS06G00547-RA,AS04G03002-RA,AS01G01847-RA	0.0455680408166835
218	BP	GO:0048767	root hair elongation	AS05G03442-RA,AS03G01361-RA,AS01G03145-RA,AS05G02324-RA,AS11G02515-RA,AS03G02945-RA,AS02G03234-RA,AS10G00451-RA,AS08G01838-RA,AS03G02705-RA,AS07G01458-RA,AS01G00062-RA,AS04G01627-RA,AS02G03784-RA,AS02G01323-RA,AS10G00478-RA,AS08G02091-RA,AS06G01820-RA,AS09G01630-RA,AS07G02417-RA,AS10G01082-RA,AS04G02297-RA,AS11G00521-RA,AS05G00041-RA	0.046128688996874
219	BP	GO:0002697	regulation of immune effector process	AS05G03666-RA,AS01G03176-RA,AS02G02681-RA,AS08G00194-RA,AS08G00132-RA,AS02G03075-RA,AS11G01476-RA,AS03G01656-RA,AS11G01104-RA,AS08G02781-RA,AS06G00961-RA,AS11G02147-RA,AS05G01733-RA,AS02G00927-RA,AS11G02145-RA,AS02G00926-RA	0.0469681973297096
220	BP	GO:0140014	mitotic nuclear division	AS04G02502-RA,AS01G00050-RA,AS05G02074-RA,AS07G02616-RA,AS05G01162-RA,AS04G01543-RA,AS08G00297-RA,AS06G00349-RA,AS06G00614-RA,AS03G02305-RA,AS06G03409-RA,AS06G03674-RA,AS06G02635-RA,AS03G00311-RA,AS02G00695-RA,AS01G03208-RA,AS05G02678-RA,AS01G00063-RA,AS01G00282-RA,AS02G03072-RA,AS05G03086-RA,AS05G02701-RA,AS04G01759-RA,AS06G00885-RA,AS01G02941-RA,AS01G01975-RA,AS04G02565-RA,AS07G03252-RA	0.0469681973297096
221	BP	GO:0048285	organelle fission	AS05G00455-RA,AS04G02502-RA,AS01G01202-RA,AS01G00050-RA,AS05G00729-RA,AS05G02074-RA,AS06G00575-RA,AS07G02616-RA,AS01G03406-RA,AS05G01162-RA,AS04G01543-RA,AS08G00297-RA,AS07G01574-RA,AS06G00349-RA,AS10G01187-RA,AS06G00614-RA,AS03G02305-RA,AS06G03409-RA,AS06G03674-RA,AS06G02635-RA,AS03G00311-RA,AS07G00333-RA,AS05G02481-RA,AS02G00695-RA,AS10G01586-RA,AS01G03208-RA,AS05G02678-RA,AS01G00063-RA,AS11G02…	0.0472393509055542
222	BP	GO:0080167	response to karrikin	AS04G03648-RA,AS06G00898-RA,AS10G00067-RA,AS01G02771-RA,AS05G02405-RA,AS03G01269-RA,AS05G02809-RA,AS02G00798-RA,AS10G00734-RA,AS06G01070-RA,AS07G01198-RA,AS01G00520-RA,AS08G01823-RA,AS11G00772-RA,AS06G03455-RA,AS06G02360-RA,AS02G00767-RA,AS04G00469-RA,AS04G03445-RA,AS04G02252-RA,AS10G01992-RA,AS01G00004-RA,AS06G01724-RA,AS05G00078-RA,AS04G00474-RA,AS07G02769-RA,AS06G01271-RA,AS03G00525-RA,AS04G00…	0.0479627017231644
223	BP	GO:0009808	lignin metabolic process	AS03G00113-RA,AS08G00466-RA,AS07G03229-RA,AS05G00657-RA,AS05G00277-RA,AS02G01011-RA,AS07G00843-RA,AS09G00734-RA,AS08G01686-RA,AS01G01384-RA,AS05G01525-RA,AS01G01036-RA,AS04G00078-RA,AS04G00573-RA,AS05G00266-RA,AS07G02808-RA,AS05G01557-RA,AS07G03244-RA,AS06G01052-RA,AS06G03538-RA,AS05G02312-RA	0.0483846711967542
224	CC	GO:0032993	protein-DNA complex	AS07G02981-RA,AS03G00483-RA,AS01G01174-RA,AS01G01212-RA,AS05G02678-RA,AS03G00491-RA,AS02G00599-RA,AS02G00588-RA,AS10G02909-RA,AS05G02491-RA,AS05G01245-RA,AS07G02472-RA,AS06G00826-RA,AS05G00192-RA,AS11G01825-RA,AS09G02135-RA,AS02G03698-RA,AS11G01804-RA,AS11G00969-RA	0.0488931552049059
225	BP	GO:0007167	enzyme linked receptor protein signaling pathway	AS02G00512-RA,AS01G00783-RA,AS03G02458-RA,AS08G01535-RA,AS01G00626-RA,AS03G00295-RA,AS11G00878-RA,AS05G00752-RA,AS08G02876-RA,AS05G01315-RA,AS11G02236-RA,AS11G02109-RA,AS04G02901-RA,AS10G00445-RA,AS05G00754-RA,AS06G00568-RA,AS02G02753-RA,AS06G00406-RA,AS05G00173-RA,AS06G01199-RA,AS05G02196-RA,AS04G03361-RA,AS05G02197-RA,AS02G01498-RA,AS11G00976-RA,AS02G01214-RA,AS08G00868-RA,AS04G03022-RA,AS10G01…	0.0489546260724463
226	BP	GO:0009700	indole phytoalexin biosynthetic process	AS01G00665-RA,AS04G03120-RA,AS02G03252-RA,AS01G01230-RA,AS06G02877-RA,AS03G00048-RA,AS04G03593-RA,AS01G03608-RA,AS01G01847-RA	0.0489546260724463
227	BP	GO:0010120	camalexin biosynthetic process	AS01G00665-RA,AS04G03120-RA,AS02G03252-RA,AS01G01230-RA,AS06G02877-RA,AS03G00048-RA,AS04G03593-RA,AS01G03608-RA,AS01G01847-RA	0.0489546260724463
228	MF	GO:0016758	hexosyltransferase activity	AS11G01454-RA,AS04G02085-RA,AS06G02856-RA,AS03G00731-RA,AS06G02320-RA,AS01G01014-RA,AS05G01492-RA,AS03G01361-RA,AS01G01009-RA,AS01G00663-RA,AS01G03145-RA,AS07G03527-RA,AS05G02843-RA,AS01G03395-RA,AS01G02730-RA,AS06G03772-RA,AS05G02324-RA,AS05G00692-RA,AS02G03148-RA,AS06G02474-RA,AS04G02275-RA,AS08G02333-RA,AS10G00596-RA,AS07G00973-RA,AS07G00526-RA,AS01G03520-RA,AS11G00803-RA,AS10G01901-RA,AS06G00…	0.0489546260724463
229	MF	GO:0016899	oxidoreductase activity, acting on the CH-OH group of donors, oxygen as acceptor	AS08G01310-RA,AS02G03347-RA,AS02G03344-RA,AS11G01469-RA,AS02G01428-RA,AS09G02116-RA,AS09G01990-RA,AS08G01437-RA,AS02G01429-RA	0.0489546260724463
230	BP	GO:0046217	indole phytoalexin metabolic process	AS01G00665-RA,AS04G03120-RA,AS02G03252-RA,AS01G01230-RA,AS06G02877-RA,AS03G00048-RA,AS04G03593-RA,AS01G03608-RA,AS01G01847-RA	0.0489546260724463
231	BP	GO:0052317	camalexin metabolic process	AS01G00665-RA,AS04G03120-RA,AS02G03252-RA,AS01G01230-RA,AS06G02877-RA,AS03G00048-RA,AS04G03593-RA,AS01G03608-RA,AS01G01847-RA	0.0489546260724463

## Sheet: DEGs-B7vsB5 （KRGG）
No.	ID	Description	GeneRatio	BgRatio	pvalue	p.adjust	qvalue	geneID	Count	Ratio
1	ko00940	Phenylpropanoid biosynthesis	99/2361	227/14627	5.54289085687821e-23	2.1118414164706e-20	1.51116708624364e-20	AS09G00319-RA/AS06G00953-RA/AS10G01519-RA/AS06G00954-RA/AS06G01386-RA/AS01G02037-RA/AS07G00512-RA/AS01G00044-RA/AS07G00902-RA/AS06G00357-RA/AS05G03136-RA/AS05G03296-RA/AS07G03229-RA/AS06G01120-RA/AS02G00147-RA/AS02G02128-RA/AS08G03784-RA/AS01G03632-RA/AS05G00657-RA/AS02G03344-RA/AS05G00277-RA/AS03G00299-RA/AS08G03789-RA/AS05G03307-RA/AS08G01434-RA/AS08G03790-RA/AS11G00732-RA/AS04G03429-RA/AS01G02…	99	0.0419313850063532
2	ko04075	Plant hormone signal transduction	126/2361	407/14627	3.51760825725247e-14	6.70104373006596e-12	4.79505546646521e-12	AS08G00383-RA/AS07G01556-RA/AS06G02943-RA/AS04G00212-RA/AS02G00564-RA/AS07G03019-RA/AS07G01140-RA/AS06G02726-RA/AS01G00665-RA/AS08G03320-RA/AS09G00635-RA/AS02G03551-RA/AS04G02560-RA/AS08G00835-RA/AS09G01629-RA/AS04G03120-RA/AS02G00184-RA/AS10G00144-RA/AS02G00079-RA/AS03G01097-RA/AS09G01157-RA/AS09G03010-RA/AS11G01176-RA/AS03G00372-RA/AS03G02739-RA/AS10G02825-RA/AS07G02566-RA/AS04G00842-RA/AS04G00…	126	0.0533672172808132
3	ko05161	Hepatitis B	91/2361	308/14627	1.92975628424299e-09	2.45079048098859e-07	1.75370834252257e-07	AS05G01265-RA/AS01G01202-RA/AS01G01222-RA/AS11G01976-RA/AS08G02881-RA/AS01G00626-RA/AS05G03018-RA/AS05G01780-RA/AS07G03537-RA/AS11G00978-RA/AS08G01921-RA/AS11G02236-RA/AS11G02109-RA/AS07G00050-RA/AS05G00173-RA/AS02G00105-RA/AS09G00747-RA/AS10G01398-RA/AS04G02530-RA/AS04G03110-RA/AS04G03361-RA/AS11G01946-RA/AS08G01730-RA/AS05G03425-RA/AS04G00203-RA/AS11G02192-RA/AS01G02623-RA/AS05G03555-RA/AS07G00…	91	0.0385429902583651
4	ko04620	Toll-like receptor signaling pathway	85/2361	284/14627	3.34036514630327e-09	2.79028496995644e-07	1.99663988732896e-07	AS05G01265-RA/AS01G01222-RA/AS03G01023-RA/AS11G01976-RA/AS08G02881-RA/AS01G00626-RA/AS05G03018-RA/AS05G01780-RA/AS11G00978-RA/AS08G01921-RA/AS11G02236-RA/AS11G02109-RA/AS07G00050-RA/AS05G00173-RA/AS02G00105-RA/AS09G00747-RA/AS10G01398-RA/AS04G02530-RA/AS04G03110-RA/AS04G03361-RA/AS11G01946-RA/AS04G00203-RA/AS11G02192-RA/AS01G02623-RA/AS05G03555-RA/AS08G03455-RA/AS07G00133-RA/AS08G01877-RA/AS06G03…	85	0.036001694197374
5	ko05133	Pertussis	88/2361	298/14627	3.66179129915543e-09	2.79028496995644e-07	1.99663988732896e-07	AS05G01265-RA/AS01G01222-RA/AS11G01976-RA/AS08G02881-RA/AS01G00626-RA/AS05G03018-RA/AS05G01780-RA/AS11G00978-RA/AS08G01921-RA/AS11G02236-RA/AS11G02109-RA/AS07G00050-RA/AS05G00173-RA/AS02G00105-RA/AS09G00747-RA/AS10G01398-RA/AS04G02530-RA/AS04G03110-RA/AS04G03361-RA/AS11G01946-RA/AS10G00413-RA/AS04G00203-RA/AS01G02623-RA/AS05G03555-RA/AS04G01789-RA/AS07G00133-RA/AS08G01877-RA/AS06G03369-RA/AS01G02…	88	0.0372723422278695
6	ko05135	Yersinia infection	91/2361	314/14627	5.56528494098367e-09	3.15262389709942e-07	2.25591819132131e-07	AS05G01265-RA/AS01G01222-RA/AS03G01023-RA/AS11G01976-RA/AS08G02881-RA/AS01G02675-RA/AS01G00626-RA/AS05G03018-RA/AS05G01780-RA/AS11G00978-RA/AS10G01973-RA/AS08G01921-RA/AS11G02236-RA/AS11G02109-RA/AS07G00050-RA/AS05G00173-RA/AS02G00105-RA/AS09G00747-RA/AS10G01398-RA/AS04G02530-RA/AS04G03110-RA/AS04G03361-RA/AS11G01946-RA/AS04G00203-RA/AS11G02192-RA/AS01G02623-RA/AS05G03555-RA/AS07G00133-RA/AS08G01…	91	0.0385429902583651
7	ko05140	Leishmaniasis	83/2361	278/14627	5.79222238312229e-09	3.15262389709942e-07	2.25591819132131e-07	AS05G01265-RA/AS01G01222-RA/AS11G01976-RA/AS08G02881-RA/AS01G00626-RA/AS05G03018-RA/AS05G01780-RA/AS11G00978-RA/AS08G01921-RA/AS11G02236-RA/AS11G02109-RA/AS07G00050-RA/AS05G00173-RA/AS02G00105-RA/AS09G00747-RA/AS10G01398-RA/AS04G02530-RA/AS04G03110-RA/AS04G03361-RA/AS11G01946-RA/AS04G00203-RA/AS01G02623-RA/AS05G03555-RA/AS02G00664-RA/AS07G00133-RA/AS08G01877-RA/AS01G00282-RA/AS06G03369-RA/AS01G02…	83	0.035154595510377
8	ko04722	Neurotrophin signaling pathway	98/2361	348/14627	7.45794558490637e-09	3.55184658481166e-07	2.54158935064572e-07	AS05G01265-RA/AS01G01222-RA/AS03G01023-RA/AS11G01976-RA/AS08G02881-RA/AS01G02675-RA/AS01G00626-RA/AS05G03018-RA/AS05G01780-RA/AS11G00978-RA/AS08G01921-RA/AS11G02236-RA/AS11G02109-RA/AS07G00050-RA/AS05G00173-RA/AS02G00105-RA/AS09G00747-RA/AS10G01398-RA/AS02G02434-RA/AS04G02530-RA/AS04G03110-RA/AS04G03361-RA/AS11G01946-RA/AS10G00413-RA/AS04G00203-RA/AS11G02192-RA/AS01G02623-RA/AS05G03555-RA/AS04G01…	98	0.0415078356628547
9	ko05132	Salmonella infection	121/2361	465/14627	2.24025335010707e-08	9.48373918211992e-07	6.78626453424246e-07	AS05G01265-RA/AS01G01222-RA/AS02G03781-RA/AS03G01023-RA/AS11G01976-RA/AS08G02881-RA/AS11G02370-RA/AS04G00055-RA/AS04G00416-RA/AS06G01981-RA/AS01G00626-RA/AS07G02612-RA/AS04G01248-RA/AS05G03018-RA/AS05G01780-RA/AS01G02548-RA/AS11G00978-RA/AS10G00968-RA/AS08G00242-RA/AS05G00615-RA/AS07G03115-RA/AS04G01216-RA/AS08G01921-RA/AS11G02236-RA/AS11G02109-RA/AS04G03529-RA/AS07G00050-RA/AS05G00173-RA/AS02G00…	121	0.0512494705633206
[truncated: 65 more rows]

## Sheet: DEGs-B10vsB5 （GO）
No.	Category	ID	term	Genes	adj_pvalue
[truncated: 131 more rows]

## Sheet: DEGs-B10vsB5 （KRGG）
No.	ID	Description	GeneRatio	BgRatio	pvalue	p.adjust	qvalue	geneID	Count	Ratio
[truncated: 27 more rows]

[truncated: 2 more sheets: DEGs-B10vsB7 （GO）, DEGs-B10vsB7 （KRGG）]
