# Supplementary material for: Multi-omics Insights into the Effects of Region and Growth Period on the Bioactive Compounds of Angelica sinensis (Oliv.) Diels
Source: Research Square preprint supplement (doi:10.21203/rs.3.rs-7812601/v1), 2025-11-24
Supplement: Supplementary file 2 [file 6be9b207e588c9572951ec37.xlsx]

## Sheet: soil_cor_p_results
.row.names	.col.names	r	p.value	.row.id	.col.id
AK	Levistilide A	0.963	5.13173e-07	1	8
AP	Coniferylferulate	-0.826012	0.000930194	2	3
Organic_Matter	3 Butylphthalide	0.803514	0.00164108	6	7
S_NP	Ligustilide	0.789479	0.00225916	7	1
AK	Senkyunolide H	0.804196	0.00274614	1	5
AP	Ferulate	-0.778952	0.00282881	2	2
S_ACP	3 Butylphthalide	0.778952	0.00282881	9	7
Organic_Matter	Ligustilide	0.79021	0.00361681	6	1
EC	Senkyunolide A	0.762752	0.00391157	4	6
EC	Coniferylferulate	-0.755286	0.00450495	4	3
S_POD	3 Butylphthalide	0.754391	0.00458047	11	7
AK	Ligustilide	0.769231	0.00525292	1	1
S_SC	Senkyunolide A	0.762238	0.00589748	10	6
AK	Senkyunolide I	0.755245	0.00659654	1	4
S_SC	Coniferylferulate	-0.73205	0.00679293	10	3
AK	3 Butylphthalide	0.729829	0.00705009	1	7
S_POD	Ligustilide	0.748252	0.00735321	11	1
S_ACP	Senkyunolide H	0.748252	0.00735321	9	5
S_NP	3 Butylphthalide	0.727113	0.00737444	7	7
S_ACP	Senkyunolide I	0.734266	0.0090521	9	4
S_ACP	Ligustilide	0.727273	0.0100009	9	1
Organic_Matter	Senkyunolide H	0.727273	0.0100009	6	5
Organic_Matter	Levistilide A	0.687857	0.0134174	6	8
S_POD	Senkyunolide I	0.699301	0.0145393	11	4
S_POD	Senkyunolide H	0.699301	0.0145393	11	5
S_NP	Senkyunolide I	0.680706	0.0148248	7	4
AP	Senkyunolide A	0.666671	0.0178992	2	6
S_ALP	Ferulate	0.658495	0.0198921	8	2
S_SC	Ferulate	-0.671329	0.0204419	10	2
TN	Coniferylferulate	-0.654992	0.0207937	3	3
S_ALP	Senkyunolide A	-0.647987	0.0226858	8	6
Organic_Matter	Senkyunolide I	0.65035	0.0259115	6	4
EC	Ferulate	-0.636213	0.0261435	4	2
S_NP	Senkyunolide H	0.635092	0.0264915	7	5
AP	3 Butylphthalide	-0.617958	0.0322359	2	7
S_NP	Levistilide A	0.612398	0.0342781	7	8
S_POD	Levistilide A	0.610253	0.0350902	11	8
S_ALP	Coniferylferulate	0.598246	0.039892	8	3
