# Supplementary material for: Multi-omics Insights into the Effects of Region and Growth Period on the Bioactive Compounds of Angelica sinensis (Oliv.) Diels
Source: Research Square preprint supplement (doi:10.21203/rs.3.rs-7812601/v1), 2025-11-24
Supplement: Supplementary file 3 [file f1a4a2c85cc9dbf80462936d.xlsx]

## Sheet: Sheet1
id	group	sub_group	mapped(%)
B10_3	B	B10	0.717
B10_2	B	B10	0.714
B10_1	B	B10	0.717
B5_3	B	B5	0.73
B5_2	B	B5	0.701
B5_1	B	B5	0.719
B7_3	B	B7	0.715
B7_2	B	B7	0.712
B7_1	B	B7	0.711
A10_3	A	A10	0.634
A10_2	A	A10	0.644
A10_1	A	A10	0.639
A5_3	A	A5	0.715
A5_2	A	A5	0.712
A5_1	A	A5	0.711
A7_3	A	A7	0.652
A7_2	A	A7	0.71
A7_1	A	A7	0.73
